# Supplementary material for: Direct coupling of two inert CO2 molecules to form a C–C bond on the Cu0 atomic interfaces of the nitrogen-doped graphene-supported Cu4 cluster
Source: Royal Society of Chemistry journal article supplement (doi:10.1039/d3qi02000b), 2023-11-01
Supplement: d3qi02000b1.pdf [file d3qi02000b1.pdf]

## Supporting Information

### Direct Coupling of Two Inert CO<sub>2</sub> Molecules to Form C–C Bond on Cu<sup>0</sup> Atomic Interfaces of the Nitrogen–Doped Graphene-Supported Cu<sub>4</sub> Cluster

Xin-Jia Cui,<sup>a</sup> Yong-Qing Qiu,<sup>b</sup> Hong-Qiang Wang,<sup>c</sup> and Chun-Guang Liu<sup>\*a</sup>

*<sup>a</sup> Department of Chemistry, Faculty of Science, Beihua University, Jilin City,*

*132013, P. R. China*

*<sup>b</sup> Institute of Functional Material Chemistry, Faculty of Chemistry, Northeast*

*Normal University, Changchun 130024, P. R. China*

**Table S1. Cu-Cu bond lengths in the Cu<sub>4</sub>/N<sub>3</sub>GN catalyst**

|                                  | 1     | 2     | 3     | 4     | 5     |
|----------------------------------|-------|-------|-------|-------|-------|
| Cu <sub>1</sub> -Cu <sub>2</sub> | 2.398 | 2.390 | 2.316 | 2.413 | 2.037 |
| Cu <sub>1</sub> -Cu <sub>3</sub> | 2.399 | 2.389 |       | 2.404 | 2.577 |
| Cu <sub>1</sub> -Cu <sub>4</sub> | 2.405 |       | 1.897 | 2.636 | 2.540 |
| Cu <sub>2</sub> -Cu <sub>4</sub> | 2.396 | 2.408 | 2.368 | 2.290 | 2.415 |
| Cu <sub>2</sub> -Cu <sub>3</sub> | 2.382 | 2.279 |       | 2.326 | 2.338 |
| Cu <sub>3</sub> -Cu <sub>4</sub> | 2.399 | 2.375 | 1.461 |       | 2.372 |

**Table S2. Bader charges of Cu in the Cu<sub>4</sub>/N<sub>3</sub>GN catalyst**

|   | atom            | Bader charge transfer ( e ) |
|---|-----------------|-----------------------------|
| 1 | Cu <sub>1</sub> | -0.57                       |
|   | Cu <sub>2</sub> | -0.01                       |
|   | Cu <sub>3</sub> | +0.00                       |
|   | Cu <sub>4</sub> | +0.00                       |
| 2 | Cu <sub>1</sub> | -0.45                       |
|   | Cu <sub>2</sub> | -0.05                       |
|   | Cu <sub>3</sub> | -0.45                       |
|   | Cu <sub>4</sub> | +0.17                       |
| 3 | Cu <sub>1</sub> | -0.48                       |
|   | Cu <sub>2</sub> | +0.08                       |
|   | Cu <sub>3</sub> | +0.06                       |
|   | Cu <sub>4</sub> | -0.12                       |
| 4 | Cu <sub>1</sub> | -0.56                       |
|   | Cu <sub>2</sub> | +0.02                       |
|   | Cu <sub>3</sub> | +0.12                       |
|   | Cu <sub>4</sub> | -0.13                       |
| 5 | Cu <sub>1</sub> | -0.60                       |
|   | Cu <sub>2</sub> | -0.30                       |
|   | Cu <sub>3</sub> | +0.01                       |
|   | Cu <sub>4</sub> | +0.02                       |

**Table S3. Cu-O, C-O, and C-C bond lengths for adsorption of two CO<sub>2</sub>**

|                                 | coupling *CO <sub>2</sub> | isolating *CO <sub>2</sub> |
|---------------------------------|---------------------------|----------------------------|
| Cu <sub>2</sub> -O <sub>1</sub> | 1.985                     | 2.118                      |
| Cu <sub>4</sub> -O <sub>2</sub> | 1.971                     | 2.093                      |
| Cu <sub>3</sub> -O <sub>3</sub> | 1.900                     | 1.973                      |
| Cu <sub>3</sub> -C <sub>1</sub> |                           | 2.192                      |
| Cu <sub>3</sub> -C <sub>2</sub> |                           | 2.249                      |
| C <sub>1</sub> -C <sub>2</sub>  | 1.552                     |                            |
| C <sub>1</sub> -O <sub>1</sub>  | 1.287                     | 1.266                      |
| C <sub>1</sub> -O <sub>2</sub>  | 1.289                     | 1.264                      |
| C <sub>2</sub> -O <sub>3</sub>  | 1.321                     | 1.193                      |
| C <sub>2</sub> -O <sub>4</sub>  | 1.226                     | 1.193                      |

**Table S4. Bader charges of free CO<sub>2</sub>**

|   | Bader charge transfer ( e ) |
|---|-----------------------------|
| C | -2.10                       |
| O | 1.05                        |
| O | 1.04                        |

**Table S5. Bader charges of  $^*\text{CO}_2+^*\text{CO}_2\rightarrow\text{TS1}\rightarrow^*\text{OOC}\text{COO}^*$** 

|                               | atom            | Bader charge transfer ( e ) |
|-------------------------------|-----------------|-----------------------------|
| $^*\text{CO}_2+^*\text{CO}_2$ | Cu <sub>1</sub> | -0.46                       |
|                               | Cu <sub>2</sub> | -0.25                       |
|                               | Cu <sub>3</sub> | -0.44                       |
|                               | Cu <sub>4</sub> | -0.25                       |
|                               | C <sub>1</sub>  | -1.38                       |
|                               | O <sub>1</sub>  | +1.08                       |
|                               | O <sub>2</sub>  | +1.08                       |
|                               | C <sub>2</sub>  | -1.61                       |
|                               | O <sub>3</sub>  | +1.04                       |
|                               | O <sub>4</sub>  | +1.06                       |
| TS1                           | Cu <sub>1</sub> | -0.47                       |
|                               | Cu <sub>2</sub> | -0.28                       |
|                               | Cu <sub>3</sub> | -0.39                       |
|                               | Cu <sub>4</sub> | -0.29                       |
|                               | C <sub>1</sub>  | -1.47                       |
|                               | O <sub>1</sub>  | +1.01                       |
|                               | O <sub>2</sub>  | +1.11                       |
|                               | C <sub>2</sub>  | -1.72                       |
|                               | O <sub>3</sub>  | +1.07                       |
|                               | O <sub>4</sub>  | +1.05                       |
| $^*\text{OOC}\text{COO}^*$    | Cu <sub>1</sub> | -0.44                       |
|                               | Cu <sub>2</sub> | -0.30                       |
|                               | Cu <sub>3</sub> | -0.34                       |
|                               | Cu <sub>4</sub> | -0.31                       |
|                               | C <sub>1</sub>  | -1.51                       |
|                               | O <sub>1</sub>  | +1.12                       |
|                               | O <sub>2</sub>  | +1.14                       |
|                               | C <sub>2</sub>  | -1.60                       |
|                               | O <sub>3</sub>  | +1.07                       |
|                               | O <sub>4</sub>  | +1.11                       |

**Figure S1. pDOS of Cu<sub>4</sub>/N<sub>3</sub>GN adsorption-coupled CO<sub>2</sub>**

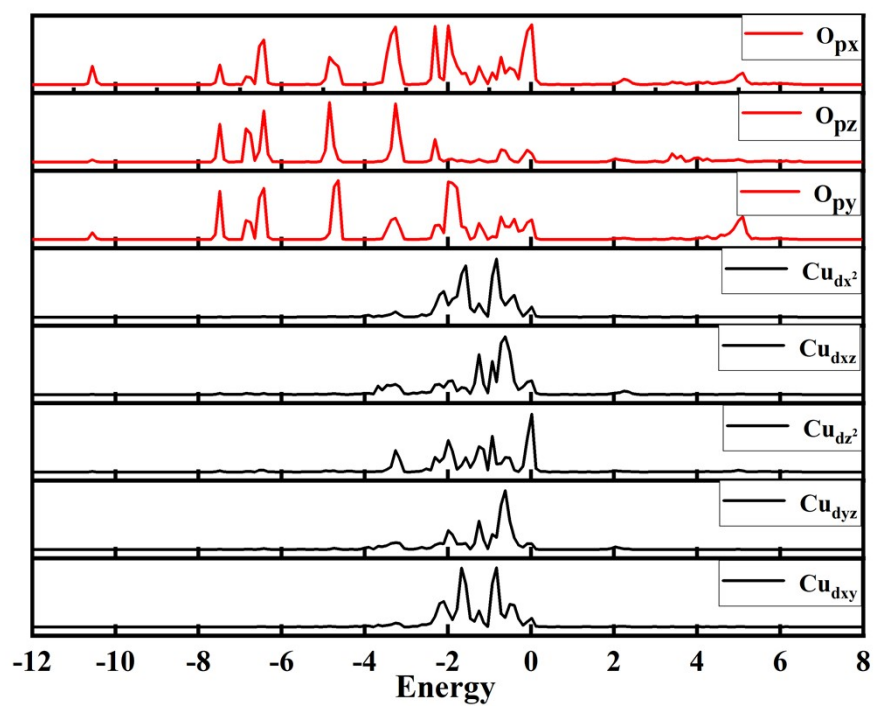

**Coordinates for all structures**

## Adsorption CO<sub>2</sub>

Structure01

top \*CO<sub>2</sub>

1.0000000000000000

14.7840003966999998 0.0000000000000000 0.0000000000000000

-7.3920001983999999 12.8033199130999993 0.0000000000000000

0.0000000000000000 0.0000000000000000 26.7110004425000014

Cu N C O

4 9 63 2

Selective dynamics

Direct

0.3883999883824316 0.6109899878387068 0.1237199976883616 F F F

0.4263576239407567 0.5474738190662165 0.1985442450979715 T T T

0.2670471302641194 0.5538343853696647 0.2018633961853226 T T T

0.4321230452805908 0.7141980029482107 0.1981434693792862 T T T

0.3273999989159151 0.6724299788206594 0.0770300030666817 F F F

0.3273600042078257 0.4895400106801233 0.0762199982880674 F F F

0.5102499723826810 0.6724500060481091 0.0761599987757577 F F F

0.9996700287274507 0.0001800000324650 0.0573600009216477 F F F

0.0003299999634265 0.3344300090962307 0.0625099986649431 F F F

0.9996899962509573 0.6666100025562471 0.0586999989901287 F F F

0.3332400024166660 0.0001599999854633 0.0586900003380535 F F F

0.6654199958038518 0.9995099902101501 0.0625599995251847 F F F

0.6666899919723832 0.3331600129459886 0.0612300001087860 F F F

0.3321700096157301 0.3312500119332853 0.0634699985367249 F F F

0.6686199903697627 0.6676899790852886 0.0635500028781806 F F F

0.9991999865008054 0.1663299948336885 0.0593199990547291 F F F

0.0001500000141448 0.5002700090658863 0.0620899982600847 F F F

0.9999099969734431 0.8333100080615523 0.0571499988286135 F F F

0.3328500091896487 0.1653199940614059 0.0589599981996258 F F F

0.3319799900125986 0.8348799943726348 0.0628399997826108 F F F

0.6658499836809995 0.1663399934903538 0.0614599995434091 F F F

0.6657000184196491 0.4994199871907909 0.0623999982923920 F F F

0.6680499911019240 0.8350800275685089 0.0631899982792987 F F F

0.1665399968694743 0.9999399781380731 0.0571300014870246 F F F

0.1647700071264779 0.3318099975501880 0.0630899965588227 F F F

0.1649599969669993 0.6678699851318157 0.0628300011305356 F F F

0.4995799959066858 0.9996899962566772 0.0621200017787373 F F F

0.5004400015054742 0.3341600000654878 0.0623699985549493 F F F

0.8335300087518434 0.0006599999888621 0.0593699999149706 F F F

0.8335000276869380 0.3339900076717370 0.0614399984580416 F F F

0.8345299959310495 0.6670100092759697 0.0590099990224289 F F F

0.1655199974769772 0.1649699956211279 0.0588000007106046 F F F

0.1689099967855014 0.5010300278786701 0.0695900022914344 F F F

|                    |                    |                    |   |   |   |
|--------------------|--------------------|--------------------|---|---|---|
| 0.1661600023717327 | 0.8336899876319350 | 0.0583200007559981 | F | F | F |
| 0.5000299811505329 | 0.1666100025210966 | 0.0600900016626156 | F | F | F |
| 0.4982599914069894 | 0.5016000270702463 | 0.0694800019188762 | F | F | F |
| 0.4988099932978187 | 0.8309299945801385 | 0.0696299970120435 | F | F | F |
| 0.8332399726153312 | 0.1666100025210966 | 0.0610099993636766 | F | F | F |
| 0.8332399726178181 | 0.4998199939886163 | 0.0600900016626156 | F | F | F |
| 0.8348900079967692 | 0.8343399763111563 | 0.0588699989124351 | F | F | F |
| 0.0547900013529556 | 0.1105799972670667 | 0.0582499988478276 | F | F | F |
| 0.0574500001527696 | 0.4450300037547379 | 0.0647099986659398 | F | F | F |
| 0.0552599988734528 | 0.7778099775364282 | 0.0577500015516321 | F | F | F |
| 0.3890799879994375 | 0.1110199987696632 | 0.0590200014557141 | F | F | F |
| 0.3847500086142546 | 0.4413599968097515 | 0.0698899999278808 | F | F | F |
| 0.3856300115637481 | 0.7774099707386029 | 0.0697999968969185 | F | F | F |
| 0.7216899990961423 | 0.1110199987696632 | 0.0616299994282770 | F | F | F |
| 0.7213600277433585 | 0.4436900019336107 | 0.0609799995887954 | F | F | F |
| 0.7239000201781849 | 0.7793800235195363 | 0.0617300011113215 | F | F | F |
| 0.0548500008969128 | 0.2779600024177142 | 0.0611100010467140 | F | F | F |
| 0.0548699982635696 | 0.6113299727824142 | 0.0609100013869721 | F | F | F |
| 0.0557399988174794 | 0.9441199898966843 | 0.0569700002542319 | F | F | F |
| 0.3894000053534441 | 0.2770200073944125 | 0.0612200014192723 | F | F | F |
| 0.3885200023536157 | 0.9449700116936768 | 0.0609200000764787 | F | F | F |
| 0.7219600081768291 | 0.2778800130081720 | 0.0612899996210956 | F | F | F |
| 0.7228400111134903 | 0.6104599833518947 | 0.0612800009690204 | F | F | F |
| 0.7218999862732431 | 0.9449999928237744 | 0.0611900016818296 | F | F | F |
| 0.2224700004002287 | 0.1112700029890163 | 0.0579399988155274 | F | F | F |
| 0.2239000052058842 | 0.4420799910817479 | 0.0698800012383671 | F | F | F |
| 0.2217099964610867 | 0.7781400084212819 | 0.0611599981631770 | F | F | F |
| 0.5554500222519394 | 0.1106600016727199 | 0.0609599985034350 | F | F | F |
| 0.5538799763018645 | 0.4459800124308089 | 0.0648500025197052 | F | F | F |
| 0.5577600002220393 | 0.7759199738370555 | 0.0699200034090950 | F | F | F |
| 0.8886299729346163 | 0.1112200022076308 | 0.0597000010326383 | F | F | F |
| 0.8891900181671417 | 0.4444000124669500 | 0.0609400011618462 | F | F | F |
| 0.8885800242332564 | 0.7773900031831715 | 0.0579899996383304 | F | F | F |
| 0.2204699963058161 | 0.2759700119173587 | 0.0616400018241308 | F | F | F |
| 0.2224200070404621 | 0.6142200231952089 | 0.0697799995553297 | F | F | F |
| 0.2220399975825629 | 0.9445899725293785 | 0.0577399991557783 | F | F | F |
| 0.5561599731237834 | 0.2784900069045193 | 0.0609700009367202 | F | F | F |
| 0.5584899783382440 | 0.6151199936777303 | 0.0699099972694697 | F | F | F |
| 0.5548200011515050 | 0.9423800111137410 | 0.0647599995261743 | F | F | F |
| 0.8888199925564066 | 0.2781499922028985 | 0.0615999996534029 | F | F | F |
| 0.8888300061197185 | 0.6107800006620749 | 0.0590399987973029 | F | F | F |
| 0.8892800212255736 | 0.9450600147559953 | 0.0582900010185554 | F | F | F |
| 0.3575077137875445 | 0.5971329887772380 | 0.2640267724848113 | T | T | T |
| 0.3825308647651620 | 0.5309151874415536 | 0.2778314712451781 | T | T | T |

0.3859859341687300 0.6891327576631655 0.2778354573819369 T T T

Structure02

bridge\_1 \*CO<sub>2</sub>

1.0000000000000000

|                     |                     |                     |
|---------------------|---------------------|---------------------|
| 14.7840003966999998 | 0.0000000000000000  | 0.0000000000000000  |
| -7.3920001983999999 | 12.8033199130999993 | 0.0000000000000000  |
| 0.0000000000000000  | 0.0000000000000000  | 26.7110004425000014 |

|    |   |    |   |
|----|---|----|---|
| Cu | N | C  | O |
| 4  | 9 | 63 | 2 |

Selective dynamics

Direct

|                    |                    |                    |   |   |   |
|--------------------|--------------------|--------------------|---|---|---|
| 0.3883999883824316 | 0.6109899878387068 | 0.1237199976883616 | F | F | F |
| 0.4822203765113383 | 0.5975345127952001 | 0.1960390056950514 | T | T | T |
| 0.3011184077288275 | 0.5525686786157155 | 0.2008433497402076 | T | T | T |
| 0.4391346619897469 | 0.7326808206077019 | 0.1937054152811114 | T | T | T |
| 0.3273999989159151 | 0.6724299788206594 | 0.0770300030666817 | F | F | F |
| 0.3273600042078257 | 0.4895400106801233 | 0.0762199982880674 | F | F | F |
| 0.5102499723826810 | 0.6724500060481091 | 0.0761599987757577 | F | F | F |
| 0.9996700287274507 | 0.0001800000324650 | 0.0573600009216477 | F | F | F |
| 0.0003299999634265 | 0.3344300090962307 | 0.0625099986649431 | F | F | F |
| 0.9996899962509573 | 0.6666100025562471 | 0.0586999989901287 | F | F | F |
| 0.3332400024166660 | 0.0001599999854633 | 0.0586900003380535 | F | F | F |
| 0.6654199958038518 | 0.9995099902101501 | 0.0625599995251847 | F | F | F |
| 0.6666899919723832 | 0.3331600129459886 | 0.0612300001087860 | F | F | F |
| 0.3321700096157301 | 0.3312500119332853 | 0.0634699985367249 | F | F | F |
| 0.6686199903697627 | 0.6676899790852886 | 0.0635500028781806 | F | F | F |
| 0.9991999865008054 | 0.1663299948336885 | 0.0593199990547291 | F | F | F |
| 0.0001500000141448 | 0.5002700090658863 | 0.0620899982600847 | F | F | F |
| 0.9999099969734431 | 0.8333100080615523 | 0.0571499988286135 | F | F | F |
| 0.3328500091896487 | 0.1653199940614059 | 0.0589599981996258 | F | F | F |
| 0.3319799900125986 | 0.8348799943726348 | 0.0628399997826108 | F | F | F |
| 0.6658499836809995 | 0.1663399934903538 | 0.0614599995434091 | F | F | F |
| 0.6657000184196491 | 0.4994199871907909 | 0.0623999982923920 | F | F | F |
| 0.6680499911019240 | 0.8350800275685089 | 0.0631899982792987 | F | F | F |
| 0.1665399968694743 | 0.9999399781380731 | 0.0571300014870246 | F | F | F |
| 0.1647700071264779 | 0.3318099975501880 | 0.0630899965588227 | F | F | F |
| 0.1649599969669993 | 0.6678699851318157 | 0.0628300011305356 | F | F | F |
| 0.4995799959066858 | 0.9996899962566772 | 0.0621200017787373 | F | F | F |
| 0.5004400015054742 | 0.3341600000654878 | 0.0623699985549493 | F | F | F |
| 0.8335300087518434 | 0.0006599999888621 | 0.0593699999149706 | F | F | F |
| 0.8335000276869380 | 0.3339900076717370 | 0.0614399984580416 | F | F | F |
| 0.8345299959310495 | 0.6670100092759697 | 0.0590099990224289 | F | F | F |
| 0.1655199974769772 | 0.1649699956211279 | 0.0588000007106046 | F | F | F |



|                    |                    |                    |   |   |   |
|--------------------|--------------------|--------------------|---|---|---|
| 0.1689099967855014 | 0.5010300278786701 | 0.0695900022914344 | F | F | F |
| 0.1661600023717327 | 0.8336899876319350 | 0.0583200007559981 | F | F | F |
| 0.5000299811505329 | 0.1666100025210966 | 0.0600900016626156 | F | F | F |
| 0.4982599914069894 | 0.5016000270702463 | 0.0694800019188762 | F | F | F |
| 0.4988099932978187 | 0.8309299945801385 | 0.0696299970120435 | F | F | F |
| 0.8332399726153312 | 0.1666100025210966 | 0.0610099993636766 | F | F | F |
| 0.8332399726178181 | 0.4998199939886163 | 0.0600900016626156 | F | F | F |
| 0.8348900079967692 | 0.8343399763111563 | 0.0588699989124351 | F | F | F |
| 0.0547900013529556 | 0.1105799972670667 | 0.0582499988478276 | F | F | F |
| 0.0574500001527696 | 0.4450300037547379 | 0.0647099986659398 | F | F | F |
| 0.0552599988734528 | 0.7778099775364282 | 0.0577500015516321 | F | F | F |
| 0.3890799879994375 | 0.1110199987696632 | 0.0590200014557141 | F | F | F |
| 0.3847500086142546 | 0.4413599968097515 | 0.0698899999278808 | F | F | F |
| 0.3856300115637481 | 0.7774099707386029 | 0.0697999968969185 | F | F | F |
| 0.7216899990961423 | 0.1110199987696632 | 0.0616299994282770 | F | F | F |
| 0.7213600277433585 | 0.4436900019336107 | 0.0609799995887954 | F | F | F |
| 0.7239000201781849 | 0.7793800235195363 | 0.0617300011113215 | F | F | F |
| 0.0548500008969128 | 0.2779600024177142 | 0.0611100010467140 | F | F | F |
| 0.0548699982635696 | 0.6113299727824142 | 0.0609100013869721 | F | F | F |
| 0.0557399988174794 | 0.9441199898966843 | 0.0569700002542319 | F | F | F |
| 0.3894000053534441 | 0.2770200073944125 | 0.0612200014192723 | F | F | F |
| 0.3885200023536157 | 0.9449700116936768 | 0.0609200000764787 | F | F | F |
| 0.7219600081768291 | 0.2778800130081720 | 0.0612899996210956 | F | F | F |
| 0.7228400111134903 | 0.6104599833518947 | 0.0612800009690204 | F | F | F |
| 0.7218999862732431 | 0.9449999928237744 | 0.0611900016818296 | F | F | F |
| 0.2224700004002287 | 0.1112700029890163 | 0.0579399988155274 | F | F | F |
| 0.2239000052058842 | 0.4420799910817479 | 0.0698800012383671 | F | F | F |
| 0.2217099964610867 | 0.7781400084212819 | 0.0611599981631770 | F | F | F |
| 0.5554500222519394 | 0.1106600016727199 | 0.0609599985034350 | F | F | F |
| 0.5538799763018645 | 0.4459800124308089 | 0.0648500025197052 | F | F | F |
| 0.5577600002220393 | 0.7759199738370555 | 0.0699200034090950 | F | F | F |
| 0.8886299729346163 | 0.1112200022076308 | 0.0597000010326383 | F | F | F |
| 0.8891900181671417 | 0.4444000124669500 | 0.0609400011618462 | F | F | F |
| 0.8885800242332564 | 0.7773900031831715 | 0.0579899996383304 | F | F | F |
| 0.2204699963058161 | 0.2759700119173587 | 0.0616400018241308 | F | F | F |
| 0.2224200070404621 | 0.6142200231952089 | 0.0697799995553297 | F | F | F |
| 0.2220399975825629 | 0.9445899725293785 | 0.0577399991557783 | F | F | F |
| 0.5561599731237834 | 0.2784900069045193 | 0.0609700009367202 | F | F | F |
| 0.5584899783382440 | 0.6151199936777303 | 0.0699099972694697 | F | F | F |
| 0.5548200011515050 | 0.9423800111137410 | 0.0647599995261743 | F | F | F |
| 0.8888199925564066 | 0.2781499922028985 | 0.0615999996534029 | F | F | F |
| 0.8888300061197185 | 0.6107800006620749 | 0.0590399987973029 | F | F | F |
| 0.8892800212255736 | 0.9450600147559953 | 0.0582900010185554 | F | F | F |
| 0.6341300207347729 | 0.7899104456327791 | 0.2322628232421513 | T | T | T |

|                    |                    |                    |   |   |   |
|--------------------|--------------------|--------------------|---|---|---|
| 0.6206813083023545 | 0.7002040860292090 | 0.2254721286069125 | T | T | T |
| 0.5802179545228394 | 0.8309327150276271 | 0.2214168883868043 | T | T | T |

Structure03

bridge\_2 \*CO<sub>2</sub>

1.0000000000000000

|                     |                    |                    |
|---------------------|--------------------|--------------------|
| 14.7840003966999998 | 0.0000000000000000 | 0.0000000000000000 |
|---------------------|--------------------|--------------------|

|                     |                     |                    |
|---------------------|---------------------|--------------------|
| -7.3920001983999999 | 12.8033199130999993 | 0.0000000000000000 |
|---------------------|---------------------|--------------------|

|                    |                    |                     |
|--------------------|--------------------|---------------------|
| 0.0000000000000000 | 0.0000000000000000 | 26.7110004425000014 |
|--------------------|--------------------|---------------------|

|    |   |   |   |
|----|---|---|---|
| Cu | N | C | O |
|----|---|---|---|

|   |   |    |   |
|---|---|----|---|
| 4 | 9 | 63 | 2 |
|---|---|----|---|

Selective dynamics

Direct

|                    |                    |                    |   |   |   |
|--------------------|--------------------|--------------------|---|---|---|
| 0.3883999883824316 | 0.6109899878387068 | 0.1237199976883616 | F | F | F |
| 0.4364075533999533 | 0.5863636306467944 | 0.2041944210453363 | T | T | T |
| 0.2540604252755503 | 0.5583107747392347 | 0.1917155789935699 | T | T | T |
| 0.4047019336697154 | 0.7263775214784599 | 0.1937993020270143 | T | T | T |
| 0.3273999989159151 | 0.6724299788206594 | 0.0770300030666817 | F | F | F |
| 0.3273600042078257 | 0.4895400106801233 | 0.0762199982880674 | F | F | F |
| 0.5102499723826810 | 0.6724500060481091 | 0.0761599987757577 | F | F | F |
| 0.9996700287274507 | 0.0001800000324650 | 0.0573600009216477 | F | F | F |
| 0.0003299999634265 | 0.3344300090962307 | 0.0625099986649431 | F | F | F |
| 0.9996899962509573 | 0.6666100025562471 | 0.0586999989901287 | F | F | F |
| 0.3332400024166660 | 0.0001599999854633 | 0.0586900003380535 | F | F | F |
| 0.6654199958038518 | 0.9995099902101501 | 0.0625599995251847 | F | F | F |
| 0.6666899919723832 | 0.3331600129459886 | 0.0612300001087860 | F | F | F |
| 0.3321700096157301 | 0.3312500119332853 | 0.0634699985367249 | F | F | F |
| 0.6686199903697627 | 0.6676899790852886 | 0.0635500028781806 | F | F | F |
| 0.9991999865008054 | 0.1663299948336885 | 0.0593199990547291 | F | F | F |
| 0.0001500000141448 | 0.5002700090658863 | 0.0620899982600847 | F | F | F |
| 0.9999099969734431 | 0.8333100080615523 | 0.0571499988286135 | F | F | F |
| 0.3328500091896487 | 0.1653199940614059 | 0.0589599981996258 | F | F | F |
| 0.3319799900125986 | 0.8348799943726348 | 0.0628399997826108 | F | F | F |
| 0.6658499836809995 | 0.1663399934903538 | 0.0614599995434091 | F | F | F |
| 0.6657000184196491 | 0.4994199871907909 | 0.0623999982923920 | F | F | F |
| 0.6680499911019240 | 0.8350800275685089 | 0.0631899982792987 | F | F | F |
| 0.1665399968694743 | 0.9999399781380731 | 0.0571300014870246 | F | F | F |
| 0.1647700071264779 | 0.3318099975501880 | 0.0630899965588227 | F | F | F |
| 0.1649599969669993 | 0.6678699851318157 | 0.0628300011305356 | F | F | F |
| 0.4995799959066858 | 0.9996899962566772 | 0.0621200017787373 | F | F | F |
| 0.5004400015054742 | 0.3341600000654878 | 0.0623699985549493 | F | F | F |
| 0.8335300087518434 | 0.0006599999888621 | 0.0593699999149706 | F | F | F |
| 0.8335000276869380 | 0.3339900076717370 | 0.0614399984580416 | F | F | F |
| 0.8345299959310495 | 0.6670100092759697 | 0.0590099990224289 | F | F | F |

|                    |                    |                    |   |   |   |
|--------------------|--------------------|--------------------|---|---|---|
| 0.1655199974769772 | 0.1649699956211279 | 0.0588000007106046 | F | F | F |
| 0.1689099967855014 | 0.5010300278786701 | 0.0695900022914344 | F | F | F |
| 0.1661600023717327 | 0.8336899876319350 | 0.0583200007559981 | F | F | F |
| 0.5000299811505329 | 0.1666100025210966 | 0.0600900016626156 | F | F | F |
| 0.4982599914069894 | 0.5016000270702463 | 0.0694800019188762 | F | F | F |
| 0.4988099932978187 | 0.8309299945801385 | 0.0696299970120435 | F | F | F |
| 0.8332399726153312 | 0.1666100025210966 | 0.0610099993636766 | F | F | F |
| 0.8332399726178181 | 0.4998199939886163 | 0.0600900016626156 | F | F | F |
| 0.8348900079967692 | 0.8343399763111563 | 0.0588699989124351 | F | F | F |
| 0.0547900013529556 | 0.1105799972670667 | 0.0582499988478276 | F | F | F |
| 0.0574500001527696 | 0.4450300037547379 | 0.0647099986659398 | F | F | F |
| 0.0552599988734528 | 0.7778099775364282 | 0.0577500015516321 | F | F | F |
| 0.3890799879994375 | 0.1110199987696632 | 0.0590200014557141 | F | F | F |
| 0.3847500086142546 | 0.4413599968097515 | 0.0698899999278808 | F | F | F |
| 0.3856300115637481 | 0.7774099707386029 | 0.0697999968969185 | F | F | F |
| 0.7216899990961423 | 0.1110199987696632 | 0.0616299994282770 | F | F | F |
| 0.7213600277433585 | 0.4436900019336107 | 0.0609799995887954 | F | F | F |
| 0.7239000201781849 | 0.7793800235195363 | 0.0617300011113215 | F | F | F |
| 0.0548500008969128 | 0.2779600024177142 | 0.0611100010467140 | F | F | F |
| 0.0548699982635696 | 0.6113299727824142 | 0.0609100013869721 | F | F | F |
| 0.0557399988174794 | 0.9441199898966843 | 0.0569700002542319 | F | F | F |
| 0.3894000053534441 | 0.2770200073944125 | 0.0612200014192723 | F | F | F |
| 0.3885200023536157 | 0.9449700116936768 | 0.0609200000764787 | F | F | F |
| 0.7219600081768291 | 0.2778800130081720 | 0.0612899996210956 | F | F | F |
| 0.7228400111134903 | 0.6104599833518947 | 0.0612800009690204 | F | F | F |
| 0.7218999862732431 | 0.9449999928237744 | 0.0611900016818296 | F | F | F |
| 0.2224700004002287 | 0.1112700029890163 | 0.0579399988155274 | F | F | F |
| 0.2239000052058842 | 0.4420799910817479 | 0.0698800012383671 | F | F | F |
| 0.2217099964610867 | 0.7781400084212819 | 0.0611599981631770 | F | F | F |
| 0.5554500222519394 | 0.1106600016727199 | 0.0609599985034350 | F | F | F |
| 0.5538799763018645 | 0.4459800124308089 | 0.0648500025197052 | F | F | F |
| 0.5577600002220393 | 0.7759199738370555 | 0.0699200034090950 | F | F | F |
| 0.8886299729346163 | 0.1112200022076308 | 0.0597000010326383 | F | F | F |
| 0.8891900181671417 | 0.4444000124669500 | 0.0609400011618462 | F | F | F |
| 0.8885800242332564 | 0.7773900031831715 | 0.0579899996383304 | F | F | F |
| 0.2204699963058161 | 0.2759700119173587 | 0.0616400018241308 | F | F | F |
| 0.2224200070404621 | 0.6142200231952089 | 0.0697799995553297 | F | F | F |
| 0.2220399975825629 | 0.9445899725293785 | 0.0577399991557783 | F | F | F |
| 0.5561599731237834 | 0.2784900069045193 | 0.0609700009367202 | F | F | F |
| 0.5584899783382440 | 0.6151199936777303 | 0.0699099972694697 | F | F | F |
| 0.5548200011515050 | 0.9423800111137410 | 0.0647599995261743 | F | F | F |
| 0.8888199925564066 | 0.2781499922028985 | 0.0615999996534029 | F | F | F |
| 0.8888300061197185 | 0.6107800006620749 | 0.0590399987973029 | F | F | F |
| 0.8892800212255736 | 0.9450600147559953 | 0.0582900010185554 | F | F | F |

|                    |                    |                    |   |   |   |
|--------------------|--------------------|--------------------|---|---|---|
| 0.2098806839371564 | 0.6630792876389731 | 0.2046980423611053 | T | T | T |
| 0.1169978103616417 | 0.6366372208396635 | 0.2069188060611769 | T | T | T |
| 0.2922232051911843 | 0.7552416165351375 | 0.2083870903421970 | T | T | T |

Structure04

coupling 2\*CO<sub>2</sub>

1.0000000000000000

|                     |                     |                     |
|---------------------|---------------------|---------------------|
| 14.7840003966999998 | 0.0000000000000000  | 0.0000000000000000  |
| -7.3920001983999999 | 12.8033199130999993 | 0.0000000000000000  |
| 0.0000000000000000  | 0.0000000000000000  | 26.7110004425000014 |

|    |   |    |   |
|----|---|----|---|
| Cu | N | C  | O |
| 4  | 9 | 64 | 4 |

Selective dynamics

Direct

|                    |                    |                    |   |   |   |
|--------------------|--------------------|--------------------|---|---|---|
| 0.3883999883824316 | 0.6109899878387068 | 0.1237199976883616 | F | F | F |
| 0.4219440486818910 | 0.5547522153667719 | 0.2038763826159971 | T | T | T |
| 0.2626138365440060 | 0.5584184169059828 | 0.1912656587350748 | T | T | T |
| 0.4293465988007806 | 0.7182224807812869 | 0.1984071614492052 | T | T | T |
| 0.3273999989159151 | 0.6724299788206594 | 0.0770300030666817 | F | F | F |
| 0.3273600042078257 | 0.4895400106801233 | 0.0762199982880674 | F | F | F |
| 0.5102499723826810 | 0.6724500060481091 | 0.0761599987757577 | F | F | F |
| 0.9996700287274507 | 0.0001800000324650 | 0.0573600009216477 | F | F | F |
| 0.0003299999634265 | 0.3344300090962307 | 0.0625099986649431 | F | F | F |
| 0.9996899962509573 | 0.6666100025562471 | 0.0586999989901287 | F | F | F |
| 0.3332400024166660 | 0.0001599999854633 | 0.0586900003380535 | F | F | F |
| 0.6654199958038518 | 0.9995099902101501 | 0.0625599995251847 | F | F | F |
| 0.6666899919723832 | 0.3331600129459886 | 0.0612300001087860 | F | F | F |
| 0.3321700096157301 | 0.3312500119332853 | 0.0634699985367249 | F | F | F |
| 0.6686199903697627 | 0.6676899790852886 | 0.0635500028781806 | F | F | F |
| 0.9991999865008054 | 0.1663299948336885 | 0.0593199990547291 | F | F | F |
| 0.0001500000141448 | 0.5002700090658863 | 0.0620899982600847 | F | F | F |
| 0.9999099969734431 | 0.8333100080615523 | 0.0571499988286135 | F | F | F |
| 0.3328500091896487 | 0.1653199940614059 | 0.0589599981996258 | F | F | F |
| 0.3319799900125986 | 0.8348799943726348 | 0.0628399997826108 | F | F | F |
| 0.6658499836809995 | 0.1663399934903538 | 0.0614599995434091 | F | F | F |
| 0.6657000184196491 | 0.4994199871907909 | 0.0623999982923920 | F | F | F |
| 0.6680499911019240 | 0.8350800275685089 | 0.0631899982792987 | F | F | F |
| 0.1665399968694743 | 0.9999399781380731 | 0.0571300014870246 | F | F | F |
| 0.1647700071264779 | 0.3318099975501880 | 0.0630899965588227 | F | F | F |
| 0.1649599969669993 | 0.6678699851318157 | 0.0628300011305356 | F | F | F |
| 0.4995799959066858 | 0.9996899962566772 | 0.0621200017787373 | F | F | F |
| 0.5004400015054742 | 0.3341600000654878 | 0.0623699985549493 | F | F | F |
| 0.8335300087518434 | 0.0006599999888621 | 0.0593699999149706 | F | F | F |
| 0.8335000276869380 | 0.3339900076717370 | 0.0614399984580416 | F | F | F |

|                    |                    |                    |   |   |   |
|--------------------|--------------------|--------------------|---|---|---|
| 0.8345299959310495 | 0.6670100092759697 | 0.0590099990224289 | F | F | F |
| 0.1655199974769772 | 0.1649699956211279 | 0.0588000007106046 | F | F | F |
| 0.1689099967855014 | 0.5010300278786701 | 0.0695900022914344 | F | F | F |
| 0.1661600023717327 | 0.8336899876319350 | 0.0583200007559981 | F | F | F |
| 0.5000299811505329 | 0.1666100025210966 | 0.0600900016626156 | F | F | F |
| 0.4982599914069894 | 0.5016000270702463 | 0.0694800019188762 | F | F | F |
| 0.4988099932978187 | 0.8309299945801385 | 0.0696299970120435 | F | F | F |
| 0.8332399726153312 | 0.1666100025210966 | 0.0610099993636766 | F | F | F |
| 0.8332399726178181 | 0.4998199939886163 | 0.0600900016626156 | F | F | F |
| 0.8348900079967692 | 0.8343399763111563 | 0.0588699989124351 | F | F | F |
| 0.0547900013529556 | 0.1105799972670667 | 0.0582499988478276 | F | F | F |
| 0.0574500001527696 | 0.4450300037547379 | 0.0647099986659398 | F | F | F |
| 0.0552599988734528 | 0.7778099775364282 | 0.0577500015516321 | F | F | F |
| 0.3890799879994375 | 0.1110199987696632 | 0.0590200014557141 | F | F | F |
| 0.3847500086142546 | 0.4413599968097515 | 0.0698899999278808 | F | F | F |
| 0.3856300115637481 | 0.7774099707386029 | 0.0697999968969185 | F | F | F |
| 0.7216899990961423 | 0.1110199987696632 | 0.0616299994282770 | F | F | F |
| 0.7213600277433585 | 0.4436900019336107 | 0.0609799995887954 | F | F | F |
| 0.7239000201781849 | 0.7793800235195363 | 0.0617300011113215 | F | F | F |
| 0.0548500008969128 | 0.2779600024177142 | 0.0611100010467140 | F | F | F |
| 0.0548699982635696 | 0.6113299727824142 | 0.0609100013869721 | F | F | F |
| 0.0557399988174794 | 0.9441199898966843 | 0.0569700002542319 | F | F | F |
| 0.3894000053534441 | 0.2770200073944125 | 0.0612200014192723 | F | F | F |
| 0.3885200023536157 | 0.9449700116936768 | 0.0609200000764787 | F | F | F |
| 0.7219600081768291 | 0.2778800130081720 | 0.0612899996210956 | F | F | F |
| 0.7228400111134903 | 0.6104599833518947 | 0.0612800009690204 | F | F | F |
| 0.7218999862732431 | 0.9449999928237744 | 0.0611900016818296 | F | F | F |
| 0.2224700004002287 | 0.1112700029890163 | 0.0579399988155274 | F | F | F |
| 0.2239000052058842 | 0.4420799910817479 | 0.0698800012383671 | F | F | F |
| 0.2217099964610867 | 0.7781400084212819 | 0.0611599981631770 | F | F | F |
| 0.5554500222519394 | 0.1106600016727199 | 0.0609599985034350 | F | F | F |
| 0.5538799763018645 | 0.4459800124308089 | 0.0648500025197052 | F | F | F |
| 0.5577600002220393 | 0.7759199738370555 | 0.0699200034090950 | F | F | F |
| 0.8886299729346163 | 0.1112200022076308 | 0.0597000010326383 | F | F | F |
| 0.8891900181671417 | 0.4444000124669500 | 0.0609400011618462 | F | F | F |
| 0.8885800242332564 | 0.7773900031831715 | 0.0579899996383304 | F | F | F |
| 0.2204699963058161 | 0.2759700119173587 | 0.0616400018241308 | F | F | F |
| 0.2224200070404621 | 0.6142200231952089 | 0.0697799995553297 | F | F | F |
| 0.2220399975825629 | 0.9445899725293785 | 0.0577399991557783 | F | F | F |
| 0.5561599731237834 | 0.2784900069045193 | 0.0609700009367202 | F | F | F |
| 0.5584899783382440 | 0.6151199936777303 | 0.0699099972694697 | F | F | F |
| 0.5548200011515050 | 0.9423800111137410 | 0.0647599995261743 | F | F | F |
| 0.8888199925564066 | 0.2781499922028985 | 0.0615999996534029 | F | F | F |
| 0.8888300061197185 | 0.6107800006620749 | 0.0590399987973029 | F | F | F |

|                    |                    |                    |   |   |   |
|--------------------|--------------------|--------------------|---|---|---|
| 0.8892800212255736 | 0.9450600147559953 | 0.0582900010185554 | F | F | F |
| 0.3557476400662427 | 0.6158820486624966 | 0.2803304365619118 | T | T | T |
| 0.2370335143260362 | 0.5620238295267281 | 0.2917485378645543 | T | T | T |
| 0.3964987989048830 | 0.5569850176505055 | 0.2767058069961230 | T | T | T |
| 0.4033613624782468 | 0.7146272850715478 | 0.2709550098945275 | T | T | T |
| 0.1809730989878906 | 0.5301498394310152 | 0.2502896859822238 | T | T | T |
| 0.2036424437726740 | 0.5524614299344457 | 0.3345754713435170 | T | T | T |

Structure05

isolating \*CO<sub>2</sub>

1.0000000000000000

|                     |                     |                     |
|---------------------|---------------------|---------------------|
| 14.7840003966999998 | 0.0000000000000000  | 0.0000000000000000  |
| -7.3920001983999999 | 12.8033199130999993 | 0.0000000000000000  |
| 0.0000000000000000  | 0.0000000000000000  | 26.7110004425000014 |

|    |   |    |   |
|----|---|----|---|
| Cu | N | C  | O |
| 4  | 9 | 64 | 4 |

Selective dynamics

Direct

|                    |                    |                    |   |   |   |
|--------------------|--------------------|--------------------|---|---|---|
| 0.3883999883824316 | 0.6109899878387068 | 0.1237199976883616 | F | F | F |
| 0.4130632493383450 | 0.5404670479457077 | 0.1991811343395985 | T | T | T |
| 0.2537897738593287 | 0.5483782282608972 | 0.2120833744654479 | T | T | T |
| 0.4209896441899800 | 0.7074902778854264 | 0.1991783261762778 | T | T | T |
| 0.3273999989159151 | 0.6724299788206594 | 0.0770300030666817 | F | F | F |
| 0.3273600042078257 | 0.4895400106801233 | 0.0762199982880674 | F | F | F |
| 0.5102499723826810 | 0.6724500060481091 | 0.0761599987757577 | F | F | F |
| 0.9996700287274507 | 0.0001800000324650 | 0.0573600009216477 | F | F | F |
| 0.0003299999634265 | 0.3344300090962307 | 0.0625099986649431 | F | F | F |
| 0.9996899962509573 | 0.6666100025562471 | 0.0586999989901287 | F | F | F |
| 0.3332400024166660 | 0.0001599999854633 | 0.0586900003380535 | F | F | F |
| 0.6654199958038518 | 0.9995099902101501 | 0.0625599995251847 | F | F | F |
| 0.6666899919723832 | 0.3331600129459886 | 0.0612300001087860 | F | F | F |
| 0.3321700096157301 | 0.3312500119332853 | 0.0634699985367249 | F | F | F |
| 0.6686199903697627 | 0.6676899790852886 | 0.0635500028781806 | F | F | F |
| 0.9991999865008054 | 0.1663299948336885 | 0.0593199990547291 | F | F | F |
| 0.0001500000141448 | 0.5002700090658863 | 0.0620899982600847 | F | F | F |
| 0.9999099969734431 | 0.8333100080615523 | 0.0571499988286135 | F | F | F |
| 0.3328500091896487 | 0.1653199940614059 | 0.0589599981996258 | F | F | F |
| 0.3319799900125986 | 0.8348799943726348 | 0.0628399997826108 | F | F | F |
| 0.6658499836809995 | 0.1663399934903538 | 0.0614599995434091 | F | F | F |
| 0.6657000184196491 | 0.4994199871907909 | 0.0623999982923920 | F | F | F |
| 0.6680499911019240 | 0.8350800275685089 | 0.0631899982792987 | F | F | F |
| 0.1665399968694743 | 0.9999399781380731 | 0.0571300014870246 | F | F | F |
| 0.1647700071264779 | 0.3318099975501880 | 0.0630899965588227 | F | F | F |
| 0.1649599969669993 | 0.6678699851318157 | 0.0628300011305356 | F | F | F |

|                    |                    |                    |   |   |   |
|--------------------|--------------------|--------------------|---|---|---|
| 0.4995799959066858 | 0.9996899962566772 | 0.0621200017787373 | F | F | F |
| 0.5004400015054742 | 0.3341600000654878 | 0.0623699985549493 | F | F | F |
| 0.8335300087518434 | 0.0006599999888621 | 0.0593699999149706 | F | F | F |
| 0.8335000276869380 | 0.3339900076717370 | 0.0614399984580416 | F | F | F |
| 0.8345299959310495 | 0.6670100092759697 | 0.0590099990224289 | F | F | F |
| 0.1655199974769772 | 0.1649699956211279 | 0.0588000007106046 | F | F | F |
| 0.1689099967855014 | 0.5010300278786701 | 0.0695900022914344 | F | F | F |
| 0.1661600023717327 | 0.8336899876319350 | 0.0583200007559981 | F | F | F |
| 0.5000299811505329 | 0.1666100025210966 | 0.0600900016626156 | F | F | F |
| 0.4982599914069894 | 0.5016000270702463 | 0.0694800019188762 | F | F | F |
| 0.4988099932978187 | 0.8309299945801385 | 0.0696299970120435 | F | F | F |
| 0.8332399726153312 | 0.1666100025210966 | 0.0610099993636766 | F | F | F |
| 0.8332399726178181 | 0.4998199939886163 | 0.0600900016626156 | F | F | F |
| 0.8348900079967692 | 0.8343399763111563 | 0.0588699989124351 | F | F | F |
| 0.0547900013529556 | 0.1105799972670667 | 0.0582499988478276 | F | F | F |
| 0.0574500001527696 | 0.4450300037547379 | 0.0647099986659398 | F | F | F |
| 0.0552599988734528 | 0.7778099775364282 | 0.0577500015516321 | F | F | F |
| 0.3890799879994375 | 0.1110199987696632 | 0.0590200014557141 | F | F | F |
| 0.3847500086142546 | 0.4413599968097515 | 0.0698899999278808 | F | F | F |
| 0.3856300115637481 | 0.7774099707386029 | 0.0697999968969185 | F | F | F |
| 0.7216899990961423 | 0.1110199987696632 | 0.0616299994282770 | F | F | F |
| 0.7213600277433585 | 0.4436900019336107 | 0.0609799995887954 | F | F | F |
| 0.7239000201781849 | 0.7793800235195363 | 0.0617300011113215 | F | F | F |
| 0.0548500008969128 | 0.2779600024177142 | 0.0611100010467140 | F | F | F |
| 0.0548699982635696 | 0.6113299727824142 | 0.0609100013869721 | F | F | F |
| 0.0557399988174794 | 0.9441199898966843 | 0.0569700002542319 | F | F | F |
| 0.3894000053534441 | 0.2770200073944125 | 0.0612200014192723 | F | F | F |
| 0.3885200023536157 | 0.9449700116936768 | 0.0609200000764787 | F | F | F |
| 0.7219600081768291 | 0.2778800130081720 | 0.0612899996210956 | F | F | F |
| 0.7228400111134903 | 0.6104599833518947 | 0.0612800009690204 | F | F | F |
| 0.7218999862732431 | 0.9449999928237744 | 0.0611900016818296 | F | F | F |
| 0.2224700004002287 | 0.1112700029890163 | 0.0579399988155274 | F | F | F |
| 0.2239000052058842 | 0.4420799910817479 | 0.0698800012383671 | F | F | F |
| 0.2217099964610867 | 0.7781400084212819 | 0.0611599981631770 | F | F | F |
| 0.5554500222519394 | 0.1106600016727199 | 0.0609599985034350 | F | F | F |
| 0.5538799763018645 | 0.4459800124308089 | 0.0648500025197052 | F | F | F |
| 0.5577600002220393 | 0.7759199738370555 | 0.0699200034090950 | F | F | F |
| 0.8886299729346163 | 0.1112200022076308 | 0.0597000010326383 | F | F | F |
| 0.8891900181671417 | 0.4444000124669500 | 0.0609400011618462 | F | F | F |
| 0.8885800242332564 | 0.7773900031831715 | 0.0579899996383304 | F | F | F |
| 0.2204699963058161 | 0.2759700119173587 | 0.0616400018241308 | F | F | F |
| 0.2224200070404621 | 0.6142200231952089 | 0.0697799995553297 | F | F | F |
| 0.2220399975825629 | 0.9445899725293785 | 0.0577399991557783 | F | F | F |
| 0.5561599731237834 | 0.2784900069045193 | 0.0609700009367202 | F | F | F |

|                    |                    |                    |   |   |   |
|--------------------|--------------------|--------------------|---|---|---|
| 0.5584899783382440 | 0.6151199936777303 | 0.0699099972694697 | F | F | F |
| 0.5548200011515050 | 0.9423800111137410 | 0.0647599995261743 | F | F | F |
| 0.8888199925564066 | 0.2781499922028985 | 0.0615999996534029 | F | F | F |
| 0.8888300061197185 | 0.6107800006620749 | 0.0590399987973029 | F | F | F |
| 0.8892800212255736 | 0.9450600147559953 | 0.0582900010185554 | F | F | F |
| 0.3627751542427797 | 0.5994684373837431 | 0.2654256050762394 | T | T | T |
| 0.1083634201029452 | 0.4820485276278713 | 0.2359058856000218 | T | T | T |
| 0.3901710702524694 | 0.5338765571957554 | 0.2783010718968291 | T | T | T |
| 0.3997058658420994 | 0.6946057215195208 | 0.2778644595818222 | T | T | T |
| 0.1014817532874559 | 0.4770341815633291 | 0.1886418327368359 | T | T | T |
| 0.0586792694994209 | 0.4605463584714972 | 0.2740705975539928 | T | T | T |

## CO<sub>2</sub> dimerization

Structure01

\*CO<sub>2</sub>+\*CO<sub>2</sub>

1.0000000000000000

|                     |                     |                     |
|---------------------|---------------------|---------------------|
| 14.7840003966999998 | 0.0000000000000000  | 0.0000000000000000  |
| -7.3920001983999999 | 12.8033199130999993 | 0.0000000000000000  |
| 0.0000000000000000  | 0.0000000000000000  | 26.7110004425000014 |

|    |   |    |   |
|----|---|----|---|
| Cu | N | C  | O |
| 4  | 9 | 64 | 4 |

Selective dynamics

Direct

|                    |                    |                    |   |   |   |
|--------------------|--------------------|--------------------|---|---|---|
| 0.3883999883824316 | 0.6109899878387068 | 0.1237199976883616 | F | F | F |
| 0.4130632493383450 | 0.5404670479457077 | 0.1991811343395985 | T | T | T |
| 0.2537897738593287 | 0.5483782282608972 | 0.2120833744654479 | T | T | T |
| 0.4209896441899800 | 0.7074902778854264 | 0.1991783261762778 | T | T | T |
| 0.3273999989159151 | 0.6724299788206594 | 0.0770300030666817 | F | F | F |
| 0.3273600042078257 | 0.4895400106801233 | 0.0762199982880674 | F | F | F |
| 0.5102499723826810 | 0.6724500060481091 | 0.0761599987757577 | F | F | F |
| 0.9996700287274507 | 0.0001800000324650 | 0.0573600009216477 | F | F | F |
| 0.0003299999634265 | 0.3344300090962307 | 0.0625099986649431 | F | F | F |
| 0.9996899962509573 | 0.6666100025562471 | 0.0586999989901287 | F | F | F |
| 0.3332400024166660 | 0.0001599999854633 | 0.0586900003380535 | F | F | F |
| 0.6654199958038518 | 0.9995099902101501 | 0.0625599995251847 | F | F | F |
| 0.6666899919723832 | 0.3331600129459886 | 0.0612300001087860 | F | F | F |
| 0.3321700096157301 | 0.3312500119332853 | 0.0634699985367249 | F | F | F |
| 0.6686199903697627 | 0.6676899790852886 | 0.0635500028781806 | F | F | F |
| 0.9991999865008054 | 0.1663299948336885 | 0.0593199990547291 | F | F | F |
| 0.0001500000141448 | 0.5002700090658863 | 0.0620899982600847 | F | F | F |
| 0.9999099969734431 | 0.8333100080615523 | 0.0571499988286135 | F | F | F |
| 0.3328500091896487 | 0.1653199940614059 | 0.0589599981996258 | F | F | F |
| 0.3319799900125986 | 0.8348799943726348 | 0.0628399997826108 | F | F | F |
| 0.6658499836809995 | 0.1663399934903538 | 0.0614599995434091 | F | F | F |



|                    |                    |                    |   |   |   |
|--------------------|--------------------|--------------------|---|---|---|
| 0.6657000184196491 | 0.4994199871907909 | 0.0623999982923920 | F | F | F |
| 0.6680499911019240 | 0.8350800275685089 | 0.0631899982792987 | F | F | F |
| 0.1665399968694743 | 0.9999399781380731 | 0.0571300014870246 | F | F | F |
| 0.1647700071264779 | 0.3318099975501880 | 0.0630899965588227 | F | F | F |
| 0.1649599969669993 | 0.6678699851318157 | 0.0628300011305356 | F | F | F |
| 0.4995799959066858 | 0.9996899962566772 | 0.0621200017787373 | F | F | F |
| 0.5004400015054742 | 0.3341600000654878 | 0.0623699985549493 | F | F | F |
| 0.8335300087518434 | 0.0006599999888621 | 0.0593699999149706 | F | F | F |
| 0.8335000276869380 | 0.3339900076717370 | 0.0614399984580416 | F | F | F |
| 0.8345299959310495 | 0.6670100092759697 | 0.0590099990224289 | F | F | F |
| 0.1655199974769772 | 0.1649699956211279 | 0.0588000007106046 | F | F | F |
| 0.1689099967855014 | 0.5010300278786701 | 0.0695900022914344 | F | F | F |
| 0.1661600023717327 | 0.8336899876319350 | 0.0583200007559981 | F | F | F |
| 0.5000299811505329 | 0.1666100025210966 | 0.0600900016626156 | F | F | F |
| 0.4982599914069894 | 0.5016000270702463 | 0.0694800019188762 | F | F | F |
| 0.4988099932978187 | 0.8309299945801385 | 0.0696299970120435 | F | F | F |
| 0.8332399726153312 | 0.1666100025210966 | 0.0610099993636766 | F | F | F |
| 0.8332399726178181 | 0.4998199939886163 | 0.0600900016626156 | F | F | F |
| 0.8348900079967692 | 0.8343399763111563 | 0.0588699989124351 | F | F | F |
| 0.0547900013529556 | 0.1105799972670667 | 0.0582499988478276 | F | F | F |
| 0.0574500001527696 | 0.4450300037547379 | 0.0647099986659398 | F | F | F |
| 0.0552599988734528 | 0.7778099775364282 | 0.0577500015516321 | F | F | F |
| 0.3890799879994375 | 0.1110199987696632 | 0.0590200014557141 | F | F | F |
| 0.3847500086142546 | 0.4413599968097515 | 0.0698899999278808 | F | F | F |
| 0.3856300115637481 | 0.7774099707386029 | 0.0697999968969185 | F | F | F |
| 0.7216899990961423 | 0.1110199987696632 | 0.0616299994282770 | F | F | F |
| 0.7213600277433585 | 0.4436900019336107 | 0.0609799995887954 | F | F | F |
| 0.7239000201781849 | 0.7793800235195363 | 0.0617300011113215 | F | F | F |
| 0.0548500008969128 | 0.2779600024177142 | 0.0611100010467140 | F | F | F |
| 0.0548699982635696 | 0.6113299727824142 | 0.0609100013869721 | F | F | F |
| 0.0557399988174794 | 0.9441199898966843 | 0.0569700002542319 | F | F | F |
| 0.3894000053534441 | 0.2770200073944125 | 0.0612200014192723 | F | F | F |
| 0.3885200023536157 | 0.9449700116936768 | 0.0609200000764787 | F | F | F |
| 0.7219600081768291 | 0.2778800130081720 | 0.0612899996210956 | F | F | F |
| 0.7228400111134903 | 0.6104599833518947 | 0.0612800009690204 | F | F | F |
| 0.7218999862732431 | 0.9449999928237744 | 0.0611900016818296 | F | F | F |
| 0.2224700004002287 | 0.1112700029890163 | 0.0579399988155274 | F | F | F |
| 0.2239000052058842 | 0.4420799910817479 | 0.0698800012383671 | F | F | F |
| 0.2217099964610867 | 0.7781400084212819 | 0.0611599981631770 | F | F | F |
| 0.5554500222519394 | 0.1106600016727199 | 0.0609599985034350 | F | F | F |
| 0.5538799763018645 | 0.4459800124308089 | 0.0648500025197052 | F | F | F |
| 0.5577600002220393 | 0.7759199738370555 | 0.0699200034090950 | F | F | F |
| 0.8886299729346163 | 0.1112200022076308 | 0.0597000010326383 | F | F | F |
| 0.8891900181671417 | 0.4444000124669500 | 0.0609400011618462 | F | F | F |

|                    |                    |                    |   |   |   |
|--------------------|--------------------|--------------------|---|---|---|
| 0.8885800242332564 | 0.7773900031831715 | 0.0579899996383304 | F | F | F |
| 0.2204699963058161 | 0.2759700119173587 | 0.0616400018241308 | F | F | F |
| 0.2224200070404621 | 0.6142200231952089 | 0.0697799995553297 | F | F | F |
| 0.2220399975825629 | 0.9445899725293785 | 0.0577399991557783 | F | F | F |
| 0.5561599731237834 | 0.2784900069045193 | 0.0609700009367202 | F | F | F |
| 0.5584899783382440 | 0.6151199936777303 | 0.0699099972694697 | F | F | F |
| 0.5548200011515050 | 0.9423800111137410 | 0.0647599995261743 | F | F | F |
| 0.8888199925564066 | 0.2781499922028985 | 0.0615999996534029 | F | F | F |
| 0.8888300061197185 | 0.6107800006620749 | 0.0590399987973029 | F | F | F |
| 0.8892800212255736 | 0.9450600147559953 | 0.0582900010185554 | F | F | F |
| 0.3627751542427797 | 0.5994684373837431 | 0.2654256050762394 | T | T | T |
| 0.1083634201029452 | 0.4820485276278713 | 0.2359058856000218 | T | T | T |
| 0.3901710702524694 | 0.5338765571957554 | 0.2783010718968291 | T | T | T |
| 0.3997058658420994 | 0.6946057215195208 | 0.2778644595818222 | T | T | T |
| 0.1014817532874559 | 0.4770341815633291 | 0.1886418327368359 | T | T | T |
| 0.0586792694994209 | 0.4605463584714972 | 0.2740705975539928 | T | T | T |

## Structure02

### TS1

1.0000000000000000

|                     |                     |                     |
|---------------------|---------------------|---------------------|
| 14.7840003966999998 | 0.0000000000000000  | 0.0000000000000000  |
| -7.3920001983999999 | 12.8033199130999993 | 0.0000000000000000  |
| 0.0000000000000000  | 0.0000000000000000  | 26.7110004425000014 |

|    |   |    |   |
|----|---|----|---|
| Cu | N | C  | O |
| 4  | 9 | 64 | 4 |

Selective dynamics

Direct

|                    |                    |                    |   |   |   |
|--------------------|--------------------|--------------------|---|---|---|
| 0.3883999883824316 | 0.6109899878387210 | 0.1237199976883616 | F | F | F |
| 0.4437601182100437 | 0.5579066858586401 | 0.1966699662415579 | F | F | F |
| 0.2898544608250617 | 0.5672253428407856 | 0.2056218852015377 | F | F | F |
| 0.4499852471488808 | 0.7248041598066877 | 0.1950994867346481 | F | F | F |
| 0.3273999989159151 | 0.6724299788206594 | 0.0770300030666817 | F | F | F |
| 0.3273600042078257 | 0.4895400106801375 | 0.0762199982880674 | F | F | F |
| 0.5102499723826810 | 0.6724500060481091 | 0.0761599987757577 | F | F | F |
| 0.9996700287274507 | 0.0001800000324650 | 0.0573600009216477 | F | F | F |
| 0.000329999634265  | 0.3344300090962307 | 0.0625099986649431 | F | F | F |
| 0.9996899962509573 | 0.6666100025562471 | 0.0586999989901287 | F | F | F |
| 0.3332400024166660 | 0.000159999854633  | 0.0586900003380535 | F | F | F |
| 0.6654199958038518 | 0.9995099902101856 | 0.0625599995251847 | F | F | F |
| 0.6666899919723832 | 0.3331600129459886 | 0.0612300001087860 | F | F | F |
| 0.3321700096157301 | 0.3312500119332853 | 0.0634699985367249 | F | F | F |
| 0.6686199903697627 | 0.6676899790852886 | 0.0635500028781806 | F | F | F |
| 0.9991999865008054 | 0.1663299948336885 | 0.0593199990547291 | F | F | F |
| 0.0001500000141377 | 0.5002700090658863 | 0.0620899982600847 | F | F | F |

|                    |                    |                    |   |   |   |
|--------------------|--------------------|--------------------|---|---|---|
| 0.9999099969734573 | 0.8333100080615807 | 0.0571499988286135 | F | F | F |
| 0.3328500091896487 | 0.1653199940614059 | 0.0589599981996258 | F | F | F |
| 0.3319799900125986 | 0.8348799943726704 | 0.0628399997826108 | F | F | F |
| 0.6658499836809995 | 0.1663399934903538 | 0.0614599995434091 | F | F | F |
| 0.6657000184196491 | 0.4994199871908052 | 0.0623999982923920 | F | F | F |
| 0.6680499911019240 | 0.8350800275685231 | 0.0631899982792987 | F | F | F |
| 0.1665399968694743 | 0.9999399781381086 | 0.0571300014870246 | F | F | F |
| 0.1647700071264779 | 0.3318099975501880 | 0.0630899965588227 | F | F | F |
| 0.1649599969669993 | 0.6678699851318157 | 0.0628300011305356 | F | F | F |
| 0.4995799959066929 | 0.9996899962567127 | 0.0621200017787373 | F | F | F |
| 0.5004400015054742 | 0.3341600000654878 | 0.0623699985549493 | F | F | F |
| 0.8335300087518434 | 0.0006599999888621 | 0.0593699999149706 | F | F | F |
| 0.8335000276869380 | 0.3339900076717370 | 0.0614399984580416 | F | F | F |
| 0.8345299959310495 | 0.6670100092759697 | 0.0590099990224289 | F | F | F |
| 0.1655199974769772 | 0.1649699956211279 | 0.0588000007106046 | F | F | F |
| 0.1689099967855014 | 0.5010300278786701 | 0.0695900022914344 | F | F | F |
| 0.1661600023717327 | 0.8336899876319563 | 0.0583200007559981 | F | F | F |
| 0.5000299811505329 | 0.1666100025210966 | 0.0600900016626156 | F | F | F |
| 0.4982599914069894 | 0.5016000270702463 | 0.0694800019188762 | F | F | F |
| 0.4988099932978258 | 0.8309299945801669 | 0.0696299970120435 | F | F | F |
| 0.8332399726153312 | 0.1666100025210966 | 0.0610099993636766 | F | F | F |
| 0.8332399726178252 | 0.4998199939886305 | 0.0600900016626156 | F | F | F |
| 0.8348900079967692 | 0.8343399763111918 | 0.0588699989124351 | F | F | F |
| 0.0547900013529556 | 0.1105799972670667 | 0.0582499988478276 | F | F | F |
| 0.0574500001527696 | 0.4450300037547379 | 0.0647099986659398 | F | F | F |
| 0.0552599988734528 | 0.7778099775364282 | 0.0577500015516321 | F | F | F |
| 0.3890799879994375 | 0.1110199987696632 | 0.0590200014557141 | F | F | F |
| 0.3847500086142546 | 0.4413599968097657 | 0.0698899999278808 | F | F | F |
| 0.3856300115637481 | 0.7774099707386029 | 0.0697999968969185 | F | F | F |
| 0.7216899990961423 | 0.1110199987696632 | 0.0616299994282770 | F | F | F |
| 0.7213600277433585 | 0.4436900019336107 | 0.0609799995887954 | F | F | F |
| 0.7239000201781849 | 0.7793800235195363 | 0.0617300011113215 | F | F | F |
| 0.0548500008969128 | 0.2779600024177142 | 0.0611100010467140 | F | F | F |
| 0.0548699982635696 | 0.6113299727824142 | 0.0609100013869721 | F | F | F |
| 0.0557399988174794 | 0.9441199898967128 | 0.0569700002542319 | F | F | F |
| 0.3894000053534441 | 0.2770200073944125 | 0.0612200014192723 | F | F | F |
| 0.3885200023536157 | 0.9449700116937123 | 0.0609200000764787 | F | F | F |
| 0.7219600081768291 | 0.2778800130081720 | 0.0612899996210956 | F | F | F |
| 0.7228400111134903 | 0.6104599833518947 | 0.0612800009690204 | F | F | F |
| 0.7218999862732431 | 0.9449999928238029 | 0.0611900016818296 | F | F | F |
| 0.2224700004002287 | 0.1112700029890163 | 0.0579399988155274 | F | F | F |
| 0.2239000052058842 | 0.4420799910817479 | 0.0698800012383671 | F | F | F |
| 0.2217099964610725 | 0.7781400084212819 | 0.0611599981631770 | F | F | F |
| 0.5554500222519394 | 0.1106600016727199 | 0.0609599985034350 | F | F | F |

|                    |                    |                    |   |   |   |
|--------------------|--------------------|--------------------|---|---|---|
| 0.5538799763018645 | 0.4459800124308231 | 0.0648500025197052 | F | F | F |
| 0.5577600002220393 | 0.7759199738370555 | 0.0699200034090950 | F | F | F |
| 0.8886299729346234 | 0.1112200022076308 | 0.0597000010326383 | F | F | F |
| 0.8891900181671417 | 0.4444000124669572 | 0.0609400011618462 | F | F | F |
| 0.8885800242332564 | 0.7773900031831715 | 0.0579899996383304 | F | F | F |
| 0.2204699963058161 | 0.2759700119173587 | 0.0616400018241308 | F | F | F |
| 0.2224200070404621 | 0.6142200231952089 | 0.0697799995553297 | F | F | F |
| 0.2220399975825629 | 0.9445899725294069 | 0.0577399991557783 | F | F | F |
| 0.5561599731237834 | 0.2784900069045193 | 0.0609700009367202 | F | F | F |
| 0.5584899783382440 | 0.6151199936777516 | 0.0699099972694697 | F | F | F |
| 0.5548200011515050 | 0.9423800111137766 | 0.0647599995261743 | F | F | F |
| 0.8888199925564066 | 0.2781499922028985 | 0.0615999996534029 | F | F | F |
| 0.8888300061197185 | 0.6107800006620820 | 0.0590399987973029 | F | F | F |
| 0.8892800212255736 | 0.9450600147560309 | 0.0582900010185554 | F | F | F |
| 0.3797151105396921 | 0.6165647666226590 | 0.2683879413302606 | T | T | T |
| 0.2079003005197819 | 0.5376565749846804 | 0.2723896381117470 | T | T | T |
| 0.4152520047169119 | 0.5573292322294208 | 0.2807407331367386 | T | T | T |
| 0.4229849988294987 | 0.7154558331090541 | 0.2748137446142707 | T | T | T |
| 0.1414365836324620 | 0.5030840951580302 | 0.2364916953614937 | T | T | T |
| 0.1958760278762881 | 0.5372449102603768 | 0.3174449834473679 | T | T | T |

### Structure03

\*OCCO\*O\*

1.0000000000000000

|                     |                     |                     |
|---------------------|---------------------|---------------------|
| 14.7840003966999998 | 0.0000000000000000  | 0.0000000000000000  |
| -7.3920001983999999 | 12.8033199130999993 | 0.0000000000000000  |
| 0.0000000000000000  | 0.0000000000000000  | 26.7110004425000014 |

|    |   |    |   |
|----|---|----|---|
| Cu | N | C  | O |
| 4  | 9 | 64 | 4 |

Selective dynamics

Direct

|                    |                    |                    |   |   |   |
|--------------------|--------------------|--------------------|---|---|---|
| 0.3883999883824316 | 0.6109899878387068 | 0.1237199976883616 | F | F | F |
| 0.4219440486818910 | 0.5547522153667719 | 0.2038763826159971 | T | T | T |
| 0.2626138365440060 | 0.5584184169059828 | 0.1912656587350748 | T | T | T |
| 0.4293465988007806 | 0.7182224807812869 | 0.1984071614492052 | T | T | T |
| 0.3273999989159151 | 0.6724299788206594 | 0.0770300030666817 | F | F | F |
| 0.3273600042078257 | 0.4895400106801233 | 0.0762199982880674 | F | F | F |
| 0.5102499723826810 | 0.6724500060481091 | 0.0761599987757577 | F | F | F |
| 0.9996700287274507 | 0.0001800000324650 | 0.0573600009216477 | F | F | F |
| 0.0003299999634265 | 0.3344300090962307 | 0.0625099986649431 | F | F | F |
| 0.9996899962509573 | 0.6666100025562471 | 0.0586999989901287 | F | F | F |
| 0.3332400024166660 | 0.0001599999854633 | 0.0586900003380535 | F | F | F |
| 0.6654199958038518 | 0.9995099902101501 | 0.0625599995251847 | F | F | F |
| 0.6666899919723832 | 0.3331600129459886 | 0.0612300001087860 | F | F | F |

|                    |                    |                    |   |   |   |
|--------------------|--------------------|--------------------|---|---|---|
| 0.3321700096157301 | 0.3312500119332853 | 0.0634699985367249 | F | F | F |
| 0.6686199903697627 | 0.6676899790852886 | 0.0635500028781806 | F | F | F |
| 0.9991999865008054 | 0.1663299948336885 | 0.0593199990547291 | F | F | F |
| 0.0001500000141448 | 0.5002700090658863 | 0.0620899982600847 | F | F | F |
| 0.9999099969734431 | 0.8333100080615523 | 0.0571499988286135 | F | F | F |
| 0.3328500091896487 | 0.1653199940614059 | 0.0589599981996258 | F | F | F |
| 0.3319799900125986 | 0.8348799943726348 | 0.0628399997826108 | F | F | F |
| 0.6658499836809995 | 0.1663399934903538 | 0.0614599995434091 | F | F | F |
| 0.6657000184196491 | 0.4994199871907909 | 0.0623999982923920 | F | F | F |
| 0.6680499911019240 | 0.8350800275685089 | 0.0631899982792987 | F | F | F |
| 0.1665399968694743 | 0.9999399781380731 | 0.0571300014870246 | F | F | F |
| 0.1647700071264779 | 0.3318099975501880 | 0.0630899965588227 | F | F | F |
| 0.1649599969669993 | 0.6678699851318157 | 0.0628300011305356 | F | F | F |
| 0.4995799959066858 | 0.9996899962566772 | 0.0621200017787373 | F | F | F |
| 0.5004400015054742 | 0.3341600000654878 | 0.0623699985549493 | F | F | F |
| 0.8335300087518434 | 0.0006599999888621 | 0.0593699999149706 | F | F | F |
| 0.8335000276869380 | 0.3339900076717370 | 0.0614399984580416 | F | F | F |
| 0.8345299959310495 | 0.6670100092759697 | 0.0590099990224289 | F | F | F |
| 0.1655199974769772 | 0.1649699956211279 | 0.0588000007106046 | F | F | F |
| 0.1689099967855014 | 0.5010300278786701 | 0.0695900022914344 | F | F | F |
| 0.1661600023717327 | 0.8336899876319350 | 0.0583200007559981 | F | F | F |
| 0.5000299811505329 | 0.1666100025210966 | 0.0600900016626156 | F | F | F |
| 0.4982599914069894 | 0.5016000270702463 | 0.0694800019188762 | F | F | F |
| 0.4988099932978187 | 0.8309299945801385 | 0.0696299970120435 | F | F | F |
| 0.8332399726153312 | 0.1666100025210966 | 0.0610099993636766 | F | F | F |
| 0.8332399726178181 | 0.4998199939886163 | 0.0600900016626156 | F | F | F |
| 0.8348900079967692 | 0.8343399763111563 | 0.0588699989124351 | F | F | F |
| 0.0547900013529556 | 0.1105799972670667 | 0.0582499988478276 | F | F | F |
| 0.0574500001527696 | 0.4450300037547379 | 0.0647099986659398 | F | F | F |
| 0.0552599988734528 | 0.7778099775364282 | 0.0577500015516321 | F | F | F |
| 0.3890799879994375 | 0.1110199987696632 | 0.0590200014557141 | F | F | F |
| 0.3847500086142546 | 0.4413599968097515 | 0.0698899999278808 | F | F | F |
| 0.3856300115637481 | 0.7774099707386029 | 0.0697999968969185 | F | F | F |
| 0.7216899990961423 | 0.1110199987696632 | 0.0616299994282770 | F | F | F |
| 0.7213600277433585 | 0.4436900019336107 | 0.0609799995887954 | F | F | F |
| 0.7239000201781849 | 0.7793800235195363 | 0.0617300011113215 | F | F | F |
| 0.0548500008969128 | 0.2779600024177142 | 0.0611100010467140 | F | F | F |
| 0.0548699982635696 | 0.6113299727824142 | 0.0609100013869721 | F | F | F |
| 0.0557399988174794 | 0.9441199898966843 | 0.0569700002542319 | F | F | F |
| 0.3894000053534441 | 0.2770200073944125 | 0.0612200014192723 | F | F | F |
| 0.3885200023536157 | 0.9449700116936768 | 0.0609200000764787 | F | F | F |
| 0.7219600081768291 | 0.2778800130081720 | 0.0612899996210956 | F | F | F |
| 0.7228400111134903 | 0.6104599833518947 | 0.0612800009690204 | F | F | F |
| 0.7218999862732431 | 0.9449999928237744 | 0.0611900016818296 | F | F | F |

|                    |                    |                    |   |   |   |
|--------------------|--------------------|--------------------|---|---|---|
| 0.2224700004002287 | 0.1112700029890163 | 0.0579399988155274 | F | F | F |
| 0.2239000052058842 | 0.4420799910817479 | 0.0698800012383671 | F | F | F |
| 0.2217099964610867 | 0.7781400084212819 | 0.0611599981631770 | F | F | F |
| 0.5554500222519394 | 0.1106600016727199 | 0.0609599985034350 | F | F | F |
| 0.5538799763018645 | 0.4459800124308089 | 0.0648500025197052 | F | F | F |
| 0.5577600002220393 | 0.7759199738370555 | 0.0699200034090950 | F | F | F |
| 0.8886299729346163 | 0.1112200022076308 | 0.0597000010326383 | F | F | F |
| 0.8891900181671417 | 0.4444000124669500 | 0.0609400011618462 | F | F | F |
| 0.8885800242332564 | 0.7773900031831715 | 0.0579899996383304 | F | F | F |
| 0.2204699963058161 | 0.2759700119173587 | 0.0616400018241308 | F | F | F |
| 0.2224200070404621 | 0.6142200231952089 | 0.0697799995553297 | F | F | F |
| 0.2220399975825629 | 0.9445899725293785 | 0.0577399991557783 | F | F | F |
| 0.5561599731237834 | 0.2784900069045193 | 0.0609700009367202 | F | F | F |
| 0.5584899783382440 | 0.6151199936777303 | 0.0699099972694697 | F | F | F |
| 0.5548200011515050 | 0.9423800111137410 | 0.0647599995261743 | F | F | F |
| 0.8888199925564066 | 0.2781499922028985 | 0.0615999996534029 | F | F | F |
| 0.8888300061197185 | 0.6107800006620749 | 0.0590399987973029 | F | F | F |
| 0.8892800212255736 | 0.9450600147559953 | 0.0582900010185554 | F | F | F |
| 0.3557476400662427 | 0.6158820486624966 | 0.2803304365619118 | T | T | T |
| 0.2370335143260362 | 0.5620238295267281 | 0.2917485378645543 | T | T | T |
| 0.3964987989048830 | 0.5569850176505055 | 0.2767058069961230 | T | T | T |
| 0.4033613624782468 | 0.7146272850715478 | 0.2709550098945275 | T | T | T |
| 0.1809730989878906 | 0.5301498394310152 | 0.2502896859822238 | T | T | T |
| 0.2036424437726740 | 0.5524614299344457 | 0.3345754713435170 | T | T | T |

Structure04

\*COOH+\*CO

1.0000000000000000

|                     |                     |                     |
|---------------------|---------------------|---------------------|
| 14.7840003966999998 | 0.0000000000000000  | 0.0000000000000000  |
| -7.3920001983999999 | 12.8033199130999993 | 0.0000000000000000  |
| 0.0000000000000000  | 0.0000000000000000  | 26.7110004425000014 |

| Cu | N | C  | O | H |
|----|---|----|---|---|
| 4  | 9 | 64 | 3 | 1 |

Selective dynamics

Direct

|                    |                    |                    |   |   |   |
|--------------------|--------------------|--------------------|---|---|---|
| 0.3883999883824316 | 0.6109899878387068 | 0.1237199976883616 | F | F | F |
| 0.4194435754205023 | 0.5699419560612911 | 0.2037902427895011 | T | T | T |
| 0.2491401905902602 | 0.5743747468857173 | 0.1971328957503611 | T | T | T |
| 0.4258965216696888 | 0.7303776783533019 | 0.1927621871198655 | T | T | T |
| 0.3273999989159151 | 0.6724299788206594 | 0.0770300030666817 | F | F | F |
| 0.3273600042078257 | 0.4895400106801233 | 0.0762199982880674 | F | F | F |
| 0.5102499723826810 | 0.6724500060481091 | 0.0761599987757577 | F | F | F |
| 0.9996700287274507 | 0.0001800000324650 | 0.0573600009216477 | F | F | F |
| 0.0003299999634265 | 0.3344300090962307 | 0.0625099986649431 | F | F | F |

|                    |                    |                    |   |   |   |
|--------------------|--------------------|--------------------|---|---|---|
| 0.9996899962509573 | 0.6666100025562471 | 0.0586999989901287 | F | F | F |
| 0.3332400024166660 | 0.0001599999854633 | 0.0586900003380535 | F | F | F |
| 0.6654199958038518 | 0.9995099902101501 | 0.0625599995251847 | F | F | F |
| 0.6666899919723832 | 0.3331600129459886 | 0.0612300001087860 | F | F | F |
| 0.3321700096157301 | 0.3312500119332853 | 0.0634699985367249 | F | F | F |
| 0.6686199903697627 | 0.6676899790852886 | 0.0635500028781806 | F | F | F |
| 0.9991999865008054 | 0.1663299948336885 | 0.0593199990547291 | F | F | F |
| 0.0001500000141448 | 0.5002700090658863 | 0.0620899982600847 | F | F | F |
| 0.9999099969734431 | 0.8333100080615523 | 0.0571499988286135 | F | F | F |
| 0.3328500091896487 | 0.1653199940614059 | 0.0589599981996258 | F | F | F |
| 0.3319799900125986 | 0.8348799943726348 | 0.0628399997826108 | F | F | F |
| 0.6658499836809995 | 0.1663399934903538 | 0.0614599995434091 | F | F | F |
| 0.6657000184196491 | 0.4994199871907909 | 0.0623999982923920 | F | F | F |
| 0.6680499911019240 | 0.8350800275685089 | 0.0631899982792987 | F | F | F |
| 0.1665399968694743 | 0.9999399781380731 | 0.0571300014870246 | F | F | F |
| 0.1647700071264779 | 0.3318099975501880 | 0.0630899965588227 | F | F | F |
| 0.1649599969669993 | 0.6678699851318157 | 0.0628300011305356 | F | F | F |
| 0.4995799959066858 | 0.9996899962566772 | 0.0621200017787373 | F | F | F |
| 0.5004400015054742 | 0.3341600000654878 | 0.0623699985549493 | F | F | F |
| 0.8335300087518434 | 0.0006599999888621 | 0.0593699999149706 | F | F | F |
| 0.8335000276869380 | 0.3339900076717370 | 0.0614399984580416 | F | F | F |
| 0.8345299959310495 | 0.6670100092759697 | 0.0590099990224289 | F | F | F |
| 0.1655199974769772 | 0.1649699956211279 | 0.0588000007106046 | F | F | F |
| 0.1689099967855014 | 0.5010300278786701 | 0.0695900022914344 | F | F | F |
| 0.1661600023717327 | 0.8336899876319350 | 0.0583200007559981 | F | F | F |
| 0.5000299811505329 | 0.1666100025210966 | 0.0600900016626156 | F | F | F |
| 0.4982599914069894 | 0.5016000270702463 | 0.0694800019188762 | F | F | F |
| 0.4988099932978187 | 0.8309299945801385 | 0.0696299970120435 | F | F | F |
| 0.8332399726153312 | 0.1666100025210966 | 0.0610099993636766 | F | F | F |
| 0.8332399726178181 | 0.4998199939886163 | 0.0600900016626156 | F | F | F |
| 0.8348900079967692 | 0.8343399763111563 | 0.0588699989124351 | F | F | F |
| 0.0547900013529556 | 0.1105799972670667 | 0.0582499988478276 | F | F | F |
| 0.0574500001527696 | 0.4450300037547379 | 0.0647099986659398 | F | F | F |
| 0.0552599988734528 | 0.7778099775364282 | 0.0577500015516321 | F | F | F |
| 0.3890799879994375 | 0.1110199987696632 | 0.0590200014557141 | F | F | F |
| 0.3847500086142546 | 0.4413599968097515 | 0.0698899999278808 | F | F | F |
| 0.3856300115637481 | 0.7774099707386029 | 0.0697999968969185 | F | F | F |
| 0.7216899990961423 | 0.1110199987696632 | 0.0616299994282770 | F | F | F |
| 0.7213600277433585 | 0.4436900019336107 | 0.0609799995887954 | F | F | F |
| 0.7239000201781849 | 0.7793800235195363 | 0.0617300011113215 | F | F | F |
| 0.0548500008969128 | 0.2779600024177142 | 0.0611100010467140 | F | F | F |
| 0.0548699982635696 | 0.6113299727824142 | 0.0609100013869721 | F | F | F |
| 0.0557399988174794 | 0.9441199898966843 | 0.0569700002542319 | F | F | F |
| 0.3894000053534441 | 0.2770200073944125 | 0.0612200014192723 | F | F | F |

|                    |                    |                    |   |   |   |
|--------------------|--------------------|--------------------|---|---|---|
| 0.3885200023536157 | 0.9449700116936768 | 0.0609200000764787 | F | F | F |
| 0.7219600081768291 | 0.2778800130081720 | 0.0612899996210956 | F | F | F |
| 0.7228400111134903 | 0.6104599833518947 | 0.0612800009690204 | F | F | F |
| 0.7218999862732431 | 0.9449999928237744 | 0.0611900016818296 | F | F | F |
| 0.2224700004002287 | 0.1112700029890163 | 0.0579399988155274 | F | F | F |
| 0.2239000052058842 | 0.4420799910817479 | 0.0698800012383671 | F | F | F |
| 0.2217099964610867 | 0.7781400084212819 | 0.0611599981631770 | F | F | F |
| 0.5554500222519394 | 0.1106600016727199 | 0.0609599985034350 | F | F | F |
| 0.5538799763018645 | 0.4459800124308089 | 0.0648500025197052 | F | F | F |
| 0.5577600002220393 | 0.7759199738370555 | 0.0699200034090950 | F | F | F |
| 0.8886299729346163 | 0.1112200022076308 | 0.0597000010326383 | F | F | F |
| 0.8891900181671417 | 0.4444000124669500 | 0.0609400011618462 | F | F | F |
| 0.8885800242332564 | 0.7773900031831715 | 0.0579899996383304 | F | F | F |
| 0.2204699963058161 | 0.2759700119173587 | 0.0616400018241308 | F | F | F |
| 0.2224200070404621 | 0.6142200231952089 | 0.0697799995553297 | F | F | F |
| 0.2220399975825629 | 0.9445899725293785 | 0.0577399991557783 | F | F | F |
| 0.5561599731237834 | 0.2784900069045193 | 0.0609700009367202 | F | F | F |
| 0.5584899783382440 | 0.6151199936777303 | 0.0699099972694697 | F | F | F |
| 0.5548200011515050 | 0.9423800111137410 | 0.0647599995261743 | F | F | F |
| 0.8888199925564066 | 0.2781499922028985 | 0.0615999996534029 | F | F | F |
| 0.8888300061197185 | 0.6107800006620749 | 0.0590399987973029 | F | F | F |
| 0.8892800212255736 | 0.9450600147559953 | 0.0582900010185554 | F | F | F |
| 0.2512913469874277 | 0.7083657963829614 | 0.2030720509774867 | T | T | T |
| 0.1682652591796102 | 0.4398806584497523 | 0.2176490469425374 | T | T | T |
| 0.1641422988813062 | 0.7163056247206658 | 0.2022188663724570 | T | T | T |
| 0.3369114664149034 | 0.7937841949308904 | 0.2087195677416377 | T | T | T |
| 0.1185112183437692 | 0.3546425180885628 | 0.2315548725629460 | T | T | T |
| 0.1864688670402007 | 0.7912625211492346 | 0.2059464258464727 | T | T | T |

#### Structure05

TS2

1.0000000000000000

|                     |                     |                     |
|---------------------|---------------------|---------------------|
| 14.7840003966999998 | 0.0000000000000000  | 0.0000000000000000  |
| -7.3920001983999999 | 12.8033199130999993 | 0.0000000000000000  |
| 0.0000000000000000  | 0.0000000000000000  | 26.7110004425000014 |

Cu N C O H

4 9 64 3 1

Selective dynamics

Direct

|                    |                    |                    |   |   |   |
|--------------------|--------------------|--------------------|---|---|---|
| 0.3883999883824316 | 0.6109899878387077 | 0.1237199976883616 | F | F | F |
| 0.4518971469782195 | 0.5923770422226484 | 0.2007220966570020 | T | T | T |
| 0.2674350215855189 | 0.5407983721852475 | 0.1931805678975612 | T | T | T |
| 0.4023312067743161 | 0.7212075299707955 | 0.1943196812184122 | T | T | T |
| 0.3273999989159152 | 0.6724299788206597 | 0.0770300030666817 | F | F | F |



|                    |                    |                    |   |   |   |
|--------------------|--------------------|--------------------|---|---|---|
| 0.3273600042078258 | 0.4895400106801239 | 0.0762199982880674 | F | F | F |
| 0.5102499723826811 | 0.6724500060481094 | 0.0761599987757577 | F | F | F |
| 0.9996700286598070 | 0.0001800000324650 | 0.0573600009216477 | F | F | F |
| 0.0003299999634263 | 0.3344300090962307 | 0.0625099986649431 | F | F | F |
| 0.9996899962509573 | 0.6666100025562472 | 0.0586999989901287 | F | F | F |
| 0.3332400024166660 | 0.0001599999854633 | 0.0586900003380535 | F | F | F |
| 0.6654199958038518 | 0.9995099902101511 | 0.0625599995251847 | F | F | F |
| 0.6666899919723832 | 0.3331600129459886 | 0.0612300001087860 | F | F | F |
| 0.3321700096157301 | 0.3312500119332855 | 0.0634699985367248 | F | F | F |
| 0.6686199903697628 | 0.6676899790852888 | 0.0635500028781806 | F | F | F |
| 0.9991999865008060 | 0.1663299948336886 | 0.0593199990547290 | F | F | F |
| 0.0001500000141445 | 0.5002700090658865 | 0.0620899982600846 | F | F | F |
| 0.9999099969734440 | 0.8333100080615534 | 0.0571499988286135 | F | F | F |
| 0.3328500091896487 | 0.1653199940614059 | 0.0589599981996258 | F | F | F |
| 0.3319799900125986 | 0.8348799943726359 | 0.0628399997826108 | F | F | F |
| 0.6658499836809995 | 0.1663399934903538 | 0.0614599995434091 | F | F | F |
| 0.6657000184196491 | 0.4994199871907915 | 0.0623999982923919 | F | F | F |
| 0.6680499911019241 | 0.8350800275685100 | 0.0631899982792987 | F | F | F |
| 0.1665399968694743 | 0.9999399781380742 | 0.0571300014870246 | F | F | F |
| 0.1647700071264779 | 0.3318099975501881 | 0.0630899965588227 | F | F | F |
| 0.1649599969669993 | 0.6678699851318157 | 0.0628300011305356 | F | F | F |
| 0.4995799959066861 | 0.9996899962566783 | 0.0621200017787373 | F | F | F |
| 0.5004400015054742 | 0.3341600000654880 | 0.0623699985549493 | F | F | F |
| 0.8335300088194800 | 0.0006599999888621 | 0.0593699999149706 | F | F | F |
| 0.8335000276869380 | 0.3339900076717370 | 0.0614399984580416 | F | F | F |
| 0.8345299959310500 | 0.6670100092759701 | 0.0590099990224289 | F | F | F |
| 0.1655199974769772 | 0.1649699956211280 | 0.0588000007106046 | F | F | F |
| 0.1689099967855014 | 0.5010300278786706 | 0.0695900022914344 | F | F | F |
| 0.1661600023717328 | 0.8336899876319361 | 0.0583200007559981 | F | F | F |
| 0.5000299811505329 | 0.1666100025210966 | 0.0600900016626156 | F | F | F |
| 0.4982599914069894 | 0.5016000270702463 | 0.0694800019188762 | F | F | F |
| 0.4988099932978191 | 0.8309299945801396 | 0.0696299970120435 | F | F | F |
| 0.8332399726153312 | 0.1666100025210966 | 0.0610099993636766 | F | F | F |
| 0.8332399726178185 | 0.4998199939886169 | 0.0600900016626156 | F | F | F |
| 0.8348900079967697 | 0.8343399763111574 | 0.0588699989124350 | F | F | F |
| 0.0547900013529557 | 0.1105799972670668 | 0.0582499988478275 | F | F | F |
| 0.0574500001527696 | 0.4450300037547384 | 0.0647099986659398 | F | F | F |
| 0.0552599988734528 | 0.7778099775364286 | 0.0577500015516321 | F | F | F |
| 0.3890799879994377 | 0.1110199987696633 | 0.0590200014557141 | F | F | F |
| 0.3847500086142550 | 0.4413599968097520 | 0.0698899999278808 | F | F | F |
| 0.3856300115637483 | 0.7774099707386032 | 0.0697999968969185 | F | F | F |
| 0.7216899990961426 | 0.1110199987696633 | 0.0616299994282770 | F | F | F |
| 0.7213600277433585 | 0.4436900019336107 | 0.0609799995887954 | F | F | F |
| 0.7239000201781849 | 0.7793800235195367 | 0.0617300011113215 | F | F | F |

|                    |                    |                    |   |   |   |
|--------------------|--------------------|--------------------|---|---|---|
| 0.0548500008969129 | 0.2779600024177144 | 0.0611100010467140 | F | F | F |
| 0.0548699982635698 | 0.6113299727824151 | 0.0609100013869721 | F | F | F |
| 0.0557399988174794 | 0.9441199898966854 | 0.0569700002542319 | F | F | F |
| 0.3894000053534442 | 0.2770200073944125 | 0.0612200014192723 | F | F | F |
| 0.3885200023536159 | 0.9449700116936779 | 0.0609200000764787 | F | F | F |
| 0.7219600081768291 | 0.2778800130081721 | 0.0612899996210956 | F | F | F |
| 0.7228400111134907 | 0.6104599833518950 | 0.0612800009690204 | F | F | F |
| 0.7218999862732431 | 0.9449999928237756 | 0.0611900016818296 | F | F | F |
| 0.2224700004002289 | 0.1112700029890165 | 0.0579399988155273 | F | F | F |
| 0.2239000052058842 | 0.4420799910817479 | 0.0698800012383671 | F | F | F |
| 0.2217099964610869 | 0.7781400084212831 | 0.0611599981631770 | F | F | F |
| 0.5554500222519395 | 0.1106600016727201 | 0.0609599985034350 | F | F | F |
| 0.5538799763018651 | 0.4459800124308094 | 0.0648500025197052 | F | F | F |
| 0.5577600002220393 | 0.7759199738370555 | 0.0699200034090950 | F | F | F |
| 0.8886299729346168 | 0.1112200022076310 | 0.0597000010326383 | F | F | F |
| 0.8891900181671419 | 0.4444000124669506 | 0.0609400011618462 | F | F | F |
| 0.8885800242332567 | 0.7773900031831716 | 0.0579899996383304 | F | F | F |
| 0.2204699963058162 | 0.2759700119173589 | 0.0616400018241308 | F | F | F |
| 0.2224200070404621 | 0.6142200231952091 | 0.0697799995553297 | F | F | F |
| 0.2220399975825631 | 0.9445899725293796 | 0.0577399991557783 | F | F | F |
| 0.5561599731237840 | 0.2784900069045197 | 0.0609700009367202 | F | F | F |
| 0.5584899783382440 | 0.6151199936777312 | 0.0699099972694697 | F | F | F |
| 0.5548200011515050 | 0.9423800111137421 | 0.0647599995261743 | F | F | F |
| 0.8888199925564066 | 0.2781499922028985 | 0.0615999996534029 | F | F | F |
| 0.8888300061197190 | 0.6107800006620758 | 0.0590399987973029 | F | F | F |
| 0.8892800212255745 | 0.9450600147559964 | 0.0582900010185554 | F | F | F |
| 0.2120288951984161 | 0.6956400733089452 | 0.2246478788902254 | T | T | T |
| 0.1373183703388037 | 0.5186518937677744 | 0.2130369630257955 | T | T | T |
| 0.1494332207370978 | 0.7281810877394075 | 0.2431380499186550 | T | T | T |
| 0.3077881256752899 | 0.7666655336248981 | 0.2185892020863577 | T | T | T |
| 0.0472809218436042 | 0.4711466936633407 | 0.2209013741665392 | T | T | T |
| 0.1913717391142257 | 0.8054791742113288 | 0.2482744945118217 | T | T | T |

Structure06

\*COCOOH

1.0000000000000000

14.7840003966999998 0.0000000000000000 0.0000000000000000

-7.3920001983999999 12.8033199130999993 0.0000000000000000

0.0000000000000000 0.0000000000000000 26.7110004425000014

Cu N C O H

4 9 64 3 1

Selective dynamics

Direct

0.3883999883824316 0.6109899878387068 0.1237199976883616 F F F

|                    |                    |                    |   |   |   |
|--------------------|--------------------|--------------------|---|---|---|
| 0.4392763547480729 | 0.5871994149137666 | 0.2029226725689758 | T | T | T |
| 0.2549012784927376 | 0.5458141485975589 | 0.1921547915995275 | T | T | T |
| 0.3955564715646387 | 0.7199252836255121 | 0.1935084037277833 | T | T | T |
| 0.3273999989159151 | 0.6724299788206594 | 0.0770300030666817 | F | F | F |
| 0.3273600042078257 | 0.4895400106801233 | 0.0762199982880674 | F | F | F |
| 0.5102499723826810 | 0.6724500060481091 | 0.0761599987757577 | F | F | F |
| 0.9996700287274507 | 0.0001800000324650 | 0.0573600009216477 | F | F | F |
| 0.0003299999634265 | 0.3344300090962307 | 0.0625099986649431 | F | F | F |
| 0.9996899962509573 | 0.6666100025562471 | 0.0586999989901287 | F | F | F |
| 0.3332400024166660 | 0.0001599999854633 | 0.0586900003380535 | F | F | F |
| 0.6654199958038518 | 0.9995099902101501 | 0.0625599995251847 | F | F | F |
| 0.6666899919723832 | 0.3331600129459886 | 0.0612300001087860 | F | F | F |
| 0.3321700096157301 | 0.3312500119332853 | 0.0634699985367249 | F | F | F |
| 0.6686199903697627 | 0.6676899790852886 | 0.0635500028781806 | F | F | F |
| 0.9991999865008054 | 0.1663299948336885 | 0.0593199990547291 | F | F | F |
| 0.0001500000141448 | 0.5002700090658863 | 0.0620899982600847 | F | F | F |
| 0.9999099969734431 | 0.8333100080615523 | 0.0571499988286135 | F | F | F |
| 0.3328500091896487 | 0.1653199940614059 | 0.0589599981996258 | F | F | F |
| 0.3319799900125986 | 0.8348799943726348 | 0.0628399997826108 | F | F | F |
| 0.6658499836809995 | 0.1663399934903538 | 0.0614599995434091 | F | F | F |
| 0.6657000184196491 | 0.4994199871907909 | 0.0623999982923920 | F | F | F |
| 0.6680499911019240 | 0.8350800275685089 | 0.0631899982792987 | F | F | F |
| 0.1665399968694743 | 0.9999399781380731 | 0.0571300014870246 | F | F | F |
| 0.1647700071264779 | 0.3318099975501880 | 0.0630899965588227 | F | F | F |
| 0.1649599969669993 | 0.6678699851318157 | 0.0628300011305356 | F | F | F |
| 0.4995799959066858 | 0.9996899962566772 | 0.0621200017787373 | F | F | F |
| 0.5004400015054742 | 0.3341600000654878 | 0.0623699985549493 | F | F | F |
| 0.8335300087518434 | 0.0006599999888621 | 0.0593699999149706 | F | F | F |
| 0.8335000276869380 | 0.3339900076717370 | 0.0614399984580416 | F | F | F |
| 0.8345299959310495 | 0.6670100092759697 | 0.0590099990224289 | F | F | F |
| 0.1655199974769772 | 0.1649699956211279 | 0.0588000007106046 | F | F | F |
| 0.1689099967855014 | 0.5010300278786701 | 0.0695900022914344 | F | F | F |
| 0.1661600023717327 | 0.8336899876319350 | 0.0583200007559981 | F | F | F |
| 0.5000299811505329 | 0.1666100025210966 | 0.0600900016626156 | F | F | F |
| 0.4982599914069894 | 0.5016000270702463 | 0.0694800019188762 | F | F | F |
| 0.4988099932978187 | 0.8309299945801385 | 0.0696299970120435 | F | F | F |
| 0.8332399726153312 | 0.1666100025210966 | 0.0610099993636766 | F | F | F |
| 0.8332399726178181 | 0.4998199939886163 | 0.0600900016626156 | F | F | F |
| 0.8348900079967692 | 0.8343399763111563 | 0.0588699989124351 | F | F | F |
| 0.0547900013529556 | 0.1105799972670667 | 0.0582499988478276 | F | F | F |
| 0.0574500001527696 | 0.4450300037547379 | 0.0647099986659398 | F | F | F |
| 0.0552599988734528 | 0.7778099775364282 | 0.0577500015516321 | F | F | F |
| 0.3890799879994375 | 0.1110199987696632 | 0.0590200014557141 | F | F | F |
| 0.3847500086142546 | 0.4413599968097515 | 0.0698899999278808 | F | F | F |

|                    |                    |                    |   |   |   |
|--------------------|--------------------|--------------------|---|---|---|
| 0.3856300115637481 | 0.7774099707386029 | 0.0697999968969185 | F | F | F |
| 0.7216899990961423 | 0.1110199987696632 | 0.0616299994282770 | F | F | F |
| 0.7213600277433585 | 0.4436900019336107 | 0.0609799995887954 | F | F | F |
| 0.7239000201781849 | 0.7793800235195363 | 0.0617300011113215 | F | F | F |
| 0.0548500008969128 | 0.2779600024177142 | 0.0611100010467140 | F | F | F |
| 0.0548699982635696 | 0.6113299727824142 | 0.0609100013869721 | F | F | F |
| 0.0557399988174794 | 0.9441199898966843 | 0.0569700002542319 | F | F | F |
| 0.3894000053534441 | 0.2770200073944125 | 0.0612200014192723 | F | F | F |
| 0.3885200023536157 | 0.9449700116936768 | 0.0609200000764787 | F | F | F |
| 0.7219600081768291 | 0.2778800130081720 | 0.0612899996210956 | F | F | F |
| 0.7228400111134903 | 0.6104599833518947 | 0.0612800009690204 | F | F | F |
| 0.7218999862732431 | 0.9449999928237744 | 0.0611900016818296 | F | F | F |
| 0.2224700004002287 | 0.1112700029890163 | 0.0579399988155274 | F | F | F |
| 0.2239000052058842 | 0.4420799910817479 | 0.0698800012383671 | F | F | F |
| 0.2217099964610867 | 0.7781400084212819 | 0.0611599981631770 | F | F | F |
| 0.5554500222519394 | 0.1106600016727199 | 0.0609599985034350 | F | F | F |
| 0.5538799763018645 | 0.4459800124308089 | 0.0648500025197052 | F | F | F |
| 0.5577600002220393 | 0.7759199738370555 | 0.0699200034090950 | F | F | F |
| 0.8886299729346163 | 0.1112200022076308 | 0.0597000010326383 | F | F | F |
| 0.8891900181671417 | 0.4444000124669500 | 0.0609400011618462 | F | F | F |
| 0.8885800242332564 | 0.7773900031831715 | 0.0579899996383304 | F | F | F |
| 0.2204699963058161 | 0.2759700119173587 | 0.0616400018241308 | F | F | F |
| 0.2224200070404621 | 0.6142200231952089 | 0.0697799995553297 | F | F | F |
| 0.2220399975825629 | 0.9445899725293785 | 0.0577399991557783 | F | F | F |
| 0.5561599731237834 | 0.2784900069045193 | 0.0609700009367202 | F | F | F |
| 0.5584899783382440 | 0.6151199936777303 | 0.0699099972694697 | F | F | F |
| 0.5548200011515050 | 0.9423800111137410 | 0.0647599995261743 | F | F | F |
| 0.8888199925564066 | 0.2781499922028985 | 0.0615999996534029 | F | F | F |
| 0.8888300061197185 | 0.6107800006620749 | 0.0590399987973029 | F | F | F |
| 0.8892800212255736 | 0.9450600147559953 | 0.0582900010185554 | F | F | F |
| 0.2088287830413699 | 0.7003187949977605 | 0.2303902374282455 | T | T | T |
| 0.1537691786619513 | 0.5862454691995360 | 0.2089870368740852 | T | T | T |
| 0.1482721773847495 | 0.7251563785214857 | 0.2573880307082777 | T | T | T |
| 0.3045348490384225 | 0.7649918373858182 | 0.2258485648841843 | T | T | T |
| 0.0596701366558077 | 0.5453396633676229 | 0.2003968774719356 | T | T | T |
| 0.1924655303617271 | 0.7957854727406499 | 0.2709554667151666 | T | T | T |

Structure07

\*CO+CO

1.0000000000000000

14.7840003966999998 0.0000000000000000 0.0000000000000000

-7.3920001983999999 12.8033199130999993 0.0000000000000000

0.0000000000000000 0.0000000000000000 26.7110004425000014

Cu N C O

## Selective dynamics

## Direct

|                    |                    |                    |   |   |   |
|--------------------|--------------------|--------------------|---|---|---|
| 0.3883999883824316 | 0.6109899878387068 | 0.1237199976883616 | F | F | F |
| 0.3638925409506603 | 0.5125976375899015 | 0.1977741039769680 | T | T | T |
| 0.3151486538953924 | 0.6421226622622641 | 0.2007716926592291 | T | T | T |
| 0.4951503331375004 | 0.7024050506691387 | 0.1943721553173900 | T | T | T |
| 0.3273999989159151 | 0.6724299788206594 | 0.0770300030666817 | F | F | F |
| 0.3273600042078257 | 0.4895400106801233 | 0.0762199982880674 | F | F | F |
| 0.5102499723826810 | 0.6724500060481091 | 0.0761599987757577 | F | F | F |
| 0.9996700287274507 | 0.0001800000324650 | 0.0573600009216477 | F | F | F |
| 0.0003299999634265 | 0.3344300090962307 | 0.0625099986649431 | F | F | F |
| 0.9996899962509573 | 0.6666100025562471 | 0.0586999989901287 | F | F | F |
| 0.3332400024166660 | 0.0001599999854633 | 0.0586900003380535 | F | F | F |
| 0.6654199958038518 | 0.9995099902101501 | 0.0625599995251847 | F | F | F |
| 0.6666899919723832 | 0.3331600129459886 | 0.0612300001087860 | F | F | F |
| 0.3321700096157301 | 0.3312500119332853 | 0.0634699985367249 | F | F | F |
| 0.6686199903697627 | 0.6676899790852886 | 0.0635500028781806 | F | F | F |
| 0.9991999865008054 | 0.1663299948336885 | 0.0593199990547291 | F | F | F |
| 0.0001500000141448 | 0.5002700090658863 | 0.0620899982600847 | F | F | F |
| 0.9999099969734431 | 0.8333100080615523 | 0.0571499988286135 | F | F | F |
| 0.3328500091896487 | 0.1653199940614059 | 0.0589599981996258 | F | F | F |
| 0.3319799900125986 | 0.8348799943726348 | 0.0628399997826108 | F | F | F |
| 0.6658499836809995 | 0.1663399934903538 | 0.0614599995434091 | F | F | F |
| 0.6657000184196491 | 0.4994199871907909 | 0.0623999982923920 | F | F | F |
| 0.6680499911019240 | 0.8350800275685089 | 0.0631899982792987 | F | F | F |
| 0.1665399968694743 | 0.9999399781380731 | 0.0571300014870246 | F | F | F |
| 0.1647700071264779 | 0.3318099975501880 | 0.0630899965588227 | F | F | F |
| 0.1649599969669993 | 0.6678699851318157 | 0.0628300011305356 | F | F | F |
| 0.4995799959066858 | 0.9996899962566772 | 0.0621200017787373 | F | F | F |
| 0.5004400015054742 | 0.3341600000654878 | 0.0623699985549493 | F | F | F |
| 0.8335300087518434 | 0.0006599999888621 | 0.0593699999149706 | F | F | F |
| 0.8335000276869380 | 0.3339900076717370 | 0.0614399984580416 | F | F | F |
| 0.8345299959310495 | 0.6670100092759697 | 0.0590099990224289 | F | F | F |
| 0.1655199974769772 | 0.1649699956211279 | 0.0588000007106046 | F | F | F |
| 0.1689099967855014 | 0.5010300278786701 | 0.0695900022914344 | F | F | F |
| 0.1661600023717327 | 0.8336899876319350 | 0.0583200007559981 | F | F | F |
| 0.5000299811505329 | 0.1666100025210966 | 0.0600900016626156 | F | F | F |
| 0.4982599914069894 | 0.5016000270702463 | 0.0694800019188762 | F | F | F |
| 0.4988099932978187 | 0.8309299945801385 | 0.0696299970120435 | F | F | F |
| 0.8332399726153312 | 0.1666100025210966 | 0.0610099993636766 | F | F | F |
| 0.8332399726178181 | 0.4998199939886163 | 0.0600900016626156 | F | F | F |
| 0.8348900079967692 | 0.8343399763111563 | 0.0588699989124351 | F | F | F |
| 0.0547900013529556 | 0.1105799972670667 | 0.0582499988478276 | F | F | F |

|                     |                    |                    |   |   |   |
|---------------------|--------------------|--------------------|---|---|---|
| 0.0574500001527696  | 0.4450300037547379 | 0.0647099986659398 | F | F | F |
| 0.0552599988734528  | 0.7778099775364282 | 0.0577500015516321 | F | F | F |
| 0.3890799879994375  | 0.1110199987696632 | 0.0590200014557141 | F | F | F |
| 0.3847500086142546  | 0.4413599968097515 | 0.0698899999278808 | F | F | F |
| 0.3856300115637481  | 0.7774099707386029 | 0.0697999968969185 | F | F | F |
| 0.7216899990961423  | 0.1110199987696632 | 0.0616299994282770 | F | F | F |
| 0.7213600277433585  | 0.4436900019336107 | 0.0609799995887954 | F | F | F |
| 0.7239000201781849  | 0.7793800235195363 | 0.0617300011113215 | F | F | F |
| 0.0548500008969128  | 0.2779600024177142 | 0.0611100010467140 | F | F | F |
| 0.0548699982635696  | 0.6113299727824142 | 0.0609100013869721 | F | F | F |
| 0.0557399988174794  | 0.9441199898966843 | 0.0569700002542319 | F | F | F |
| 0.3894000053534441  | 0.2770200073944125 | 0.0612200014192723 | F | F | F |
| 0.3885200023536157  | 0.9449700116936768 | 0.0609200000764787 | F | F | F |
| 0.7219600081768291  | 0.2778800130081720 | 0.0612899996210956 | F | F | F |
| 0.7228400111134903  | 0.6104599833518947 | 0.0612800009690204 | F | F | F |
| 0.7218999862732431  | 0.9449999928237744 | 0.0611900016818296 | F | F | F |
| 0.2224700004002287  | 0.1112700029890163 | 0.0579399988155274 | F | F | F |
| 0.2239000052058842  | 0.4420799910817479 | 0.0698800012383671 | F | F | F |
| 0.2217099964610867  | 0.7781400084212819 | 0.0611599981631770 | F | F | F |
| 0.5554500222519394  | 0.1106600016727199 | 0.0609599985034350 | F | F | F |
| 0.5538799763018645  | 0.4459800124308089 | 0.0648500025197052 | F | F | F |
| 0.5577600002220393  | 0.7759199738370555 | 0.0699200034090950 | F | F | F |
| 0.8886299729346163  | 0.1112200022076308 | 0.0597000010326383 | F | F | F |
| 0.8891900181671417  | 0.4444000124669500 | 0.0609400011618462 | F | F | F |
| 0.8885800242332564  | 0.7773900031831715 | 0.0579899996383304 | F | F | F |
| 0.2204699963058161  | 0.2759700119173587 | 0.0616400018241308 | F | F | F |
| 0.2224200070404621  | 0.6142200231952089 | 0.0697799995553297 | F | F | F |
| 0.2220399975825629  | 0.9445899725293785 | 0.0577399991557783 | F | F | F |
| 0.5561599731237834  | 0.2784900069045193 | 0.0609700009367202 | F | F | F |
| 0.5584899783382440  | 0.6151199936777303 | 0.0699099972694697 | F | F | F |
| 0.5548200011515050  | 0.9423800111137410 | 0.0647599995261743 | F | F | F |
| 0.8888199925564066  | 0.2781499922028985 | 0.0615999996534029 | F | F | F |
| 0.8888300061197185  | 0.6107800006620749 | 0.0590399987973029 | F | F | F |
| 0.8892800212255736  | 0.9450600147559953 | 0.0582900010185554 | F | F | F |
| 0.2359551044404608  | 0.6804506305026675 | 0.2354967805960252 | T | T | T |
| -0.0639337260118251 | 0.5544420656126509 | 0.2553012964990847 | T | T | T |
| 0.1883745436856193  | 0.7064626983966146 | 0.2602060994290081 | T | T | T |
| -0.0587600414728097 | 0.4975928056005482 | 0.2825832978229738 | T | T | T |

Structure08

TS3

1.0000000000000000

|                     |                     |                    |
|---------------------|---------------------|--------------------|
| 14.7840003966999998 | 0.0000000000000000  | 0.0000000000000000 |
| -7.3920001983999999 | 12.8033199130999993 | 0.0000000000000000 |

0.0000000000000000 0.0000000000000000 26.7110004425000014

Cu N C O  
4 9 64 2

Selective dynamics

Direct

|                    |                    |                    |   |   |   |
|--------------------|--------------------|--------------------|---|---|---|
| 0.3883999883824316 | 0.6109899878387068 | 0.1237199976883616 | F | F | F |
| 0.4489117563020457 | 0.5817316770612990 | 0.1996420919717892 | F | F | F |
| 0.2705662548140850 | 0.5546454786882364 | 0.1973916292034801 | F | F | F |
| 0.4262892306244197 | 0.7279849648576970 | 0.1966085434091127 | F | F | F |
| 0.3273999989159151 | 0.6724299788206594 | 0.0770300030666817 | F | F | F |
| 0.3273600042078257 | 0.4895400106801233 | 0.0762199982880674 | F | F | F |
| 0.5102499723826810 | 0.6724500060481091 | 0.0761599987757577 | F | F | F |
| 0.9996700286598070 | 0.0001800000324650 | 0.0573600009216477 | F | F | F |
| 0.0003299999634265 | 0.3344300090962307 | 0.0625099986649431 | F | F | F |
| 0.9996899962509573 | 0.6666100025562471 | 0.0586999989901287 | F | F | F |
| 0.3332400024166660 | 0.0001599999854633 | 0.0586900003380535 | F | F | F |
| 0.6654199958038518 | 0.9995099902101501 | 0.0625599995251847 | F | F | F |
| 0.6666899919723832 | 0.3331600129459886 | 0.0612300001087860 | F | F | F |
| 0.3321700096157301 | 0.3312500119332853 | 0.0634699985367249 | F | F | F |
| 0.6686199903697627 | 0.6676899790852886 | 0.0635500028781806 | F | F | F |
| 0.9991999865008054 | 0.1663299948336885 | 0.0593199990547291 | F | F | F |
| 0.0001500000141448 | 0.5002700090658863 | 0.0620899982600847 | F | F | F |
| 0.9999099969734431 | 0.8333100080615523 | 0.0571499988286135 | F | F | F |
| 0.3328500091896487 | 0.1653199940614059 | 0.0589599981996258 | F | F | F |
| 0.3319799900125986 | 0.8348799943726348 | 0.0628399997826108 | F | F | F |
| 0.6658499836809995 | 0.1663399934903538 | 0.0614599995434091 | F | F | F |
| 0.6657000184196491 | 0.4994199871907909 | 0.0623999982923920 | F | F | F |
| 0.6680499911019240 | 0.8350800275685089 | 0.0631899982792987 | F | F | F |
| 0.1665399968694743 | 0.9999399781380731 | 0.0571300014870246 | F | F | F |
| 0.1647700071264779 | 0.3318099975501880 | 0.0630899965588227 | F | F | F |
| 0.1649599969669993 | 0.6678699851318157 | 0.0628300011305356 | F | F | F |
| 0.4995799959066858 | 0.9996899962566772 | 0.0621200017787373 | F | F | F |
| 0.5004400015054742 | 0.3341600000654878 | 0.0623699985549493 | F | F | F |
| 0.8335300088194799 | 0.0006599999888621 | 0.0593699999149706 | F | F | F |
| 0.8335000276869380 | 0.3339900076717370 | 0.0614399984580416 | F | F | F |
| 0.8345299959310495 | 0.6670100092759697 | 0.0590099990224289 | F | F | F |
| 0.1655199974769772 | 0.1649699956211279 | 0.0588000007106046 | F | F | F |
| 0.1689099967855014 | 0.5010300278786701 | 0.0695900022914344 | F | F | F |
| 0.1661600023717327 | 0.8336899876319350 | 0.0583200007559981 | F | F | F |
| 0.5000299811505329 | 0.1666100025210966 | 0.0600900016626156 | F | F | F |
| 0.4982599914069894 | 0.5016000270702463 | 0.0694800019188762 | F | F | F |
| 0.4988099932978187 | 0.8309299945801385 | 0.0696299970120435 | F | F | F |
| 0.8332399726153312 | 0.1666100025210966 | 0.0610099993636766 | F | F | F |
| 0.8332399726178181 | 0.4998199939886163 | 0.0600900016626156 | F | F | F |

|                    |                    |                    |   |   |   |
|--------------------|--------------------|--------------------|---|---|---|
| 0.8348900079967692 | 0.8343399763111563 | 0.0588699989124351 | F | F | F |
| 0.0547900013529556 | 0.1105799972670667 | 0.0582499988478276 | F | F | F |
| 0.0574500001527696 | 0.4450300037547379 | 0.0647099986659398 | F | F | F |
| 0.0552599988734528 | 0.7778099775364282 | 0.0577500015516321 | F | F | F |
| 0.3890799879994375 | 0.1110199987696632 | 0.0590200014557141 | F | F | F |
| 0.3847500086142546 | 0.4413599968097515 | 0.0698899999278808 | F | F | F |
| 0.3856300115637481 | 0.7774099707386029 | 0.0697999968969185 | F | F | F |
| 0.7216899990961423 | 0.1110199987696632 | 0.0616299994282770 | F | F | F |
| 0.7213600277433585 | 0.4436900019336107 | 0.0609799995887954 | F | F | F |
| 0.7239000201781849 | 0.7793800235195363 | 0.0617300011113215 | F | F | F |
| 0.0548500008969128 | 0.2779600024177142 | 0.0611100010467140 | F | F | F |
| 0.0548699982635696 | 0.6113299727824142 | 0.0609100013869721 | F | F | F |
| 0.0557399988174794 | 0.9441199898966843 | 0.0569700002542319 | F | F | F |
| 0.3894000053534441 | 0.2770200073944125 | 0.0612200014192723 | F | F | F |
| 0.3885200023536157 | 0.9449700116936768 | 0.0609200000764787 | F | F | F |
| 0.7219600081768291 | 0.2778800130081720 | 0.0612899996210956 | F | F | F |
| 0.7228400111134903 | 0.6104599833518947 | 0.0612800009690204 | F | F | F |
| 0.7218999862732431 | 0.9449999928237744 | 0.0611900016818296 | F | F | F |
| 0.2224700004002287 | 0.1112700029890163 | 0.0579399988155274 | F | F | F |
| 0.2239000052058842 | 0.4420799910817479 | 0.0698800012383671 | F | F | F |
| 0.2217099964610867 | 0.7781400084212819 | 0.0611599981631770 | F | F | F |
| 0.5554500222519394 | 0.1106600016727199 | 0.0609599985034350 | F | F | F |
| 0.5538799763018645 | 0.4459800124308089 | 0.0648500025197052 | F | F | F |
| 0.5577600002220393 | 0.7759199738370555 | 0.0699200034090950 | F | F | F |
| 0.8886299729346163 | 0.1112200022076308 | 0.0597000010326383 | F | F | F |
| 0.8891900181671417 | 0.4444000124669500 | 0.0609400011618462 | F | F | F |
| 0.8885800242332564 | 0.7773900031831715 | 0.0579899996383304 | F | F | F |
| 0.2204699963058161 | 0.2759700119173587 | 0.0616400018241308 | F | F | F |
| 0.2224200070404621 | 0.6142200231952089 | 0.0697799995553297 | F | F | F |
| 0.2220399975825629 | 0.9445899725293785 | 0.0577399991557783 | F | F | F |
| 0.5561599731237834 | 0.2784900069045193 | 0.0609700009367202 | F | F | F |
| 0.5584899783382440 | 0.6151199936777303 | 0.0699099972694697 | F | F | F |
| 0.5548200011515050 | 0.9423800111137410 | 0.0647599995261743 | F | F | F |
| 0.8888199925564066 | 0.2781499922028985 | 0.0615999996534029 | F | F | F |
| 0.8888300061197185 | 0.6107800006620749 | 0.0590399987973029 | F | F | F |
| 0.8892800212255736 | 0.9450600147559953 | 0.0582900010185554 | F | F | F |
| 0.2500824388295015 | 0.6358385212003128 | 0.2518488221540522 | T | T | T |
| 0.1068863693949993 | 0.6093613104221021 | 0.2633630969810881 | T | T | T |
| 0.3177573835008118 | 0.7303548347981490 | 0.2446344012485255 | T | T | T |
| 0.0356535336474408 | 0.5461245870179142 | 0.2914118030418267 | T | T | T |

Structure09

\*OCCO

1.00000000000000



|                     |                     |                     |
|---------------------|---------------------|---------------------|
| 14.7840003966999998 | 0.0000000000000000  | 0.0000000000000000  |
| -7.3920001983999999 | 12.8033199130999993 | 0.0000000000000000  |
| 0.0000000000000000  | 0.0000000000000000  | 26.7110004425000014 |

|    |   |    |   |
|----|---|----|---|
| Cu | N | C  | O |
| 4  | 9 | 64 | 2 |

Selective dynamics

Direct

|                    |                    |                    |   |   |   |
|--------------------|--------------------|--------------------|---|---|---|
| 0.3883999883824316 | 0.6109899878387068 | 0.1237199976883616 | F | F | F |
| 0.4424428128097739 | 0.5754195930843953 | 0.1998533104227568 | T | T | T |
| 0.2704923047599229 | 0.5589630320675921 | 0.1990504019288104 | T | T | T |
| 0.4266642009364209 | 0.7279665069881117 | 0.1964385658164190 | T | T | T |
| 0.3273999989159151 | 0.6724299788206594 | 0.0770300030666817 | F | F | F |
| 0.3273600042078257 | 0.4895400106801233 | 0.0762199982880674 | F | F | F |
| 0.5102499723826810 | 0.6724500060481091 | 0.0761599987757577 | F | F | F |
| 0.9996700287274507 | 0.0001800000324650 | 0.0573600009216477 | F | F | F |
| 0.0003299999634265 | 0.3344300090962307 | 0.0625099986649431 | F | F | F |
| 0.9996899962509573 | 0.6666100025562471 | 0.0586999989901287 | F | F | F |
| 0.3332400024166660 | 0.0001599999854633 | 0.0586900003380535 | F | F | F |
| 0.6654199958038518 | 0.9995099902101501 | 0.0625599995251847 | F | F | F |
| 0.6666899919723832 | 0.3331600129459886 | 0.0612300001087860 | F | F | F |
| 0.3321700096157301 | 0.3312500119332853 | 0.0634699985367249 | F | F | F |
| 0.6686199903697627 | 0.6676899790852886 | 0.0635500028781806 | F | F | F |
| 0.9991999865008054 | 0.1663299948336885 | 0.0593199990547291 | F | F | F |
| 0.0001500000141448 | 0.5002700090658863 | 0.0620899982600847 | F | F | F |
| 0.9999099969734431 | 0.8333100080615523 | 0.0571499988286135 | F | F | F |
| 0.3328500091896487 | 0.1653199940614059 | 0.0589599981996258 | F | F | F |
| 0.3319799900125986 | 0.8348799943726348 | 0.0628399997826108 | F | F | F |
| 0.6658499836809995 | 0.1663399934903538 | 0.0614599995434091 | F | F | F |
| 0.6657000184196491 | 0.4994199871907909 | 0.0623999982923920 | F | F | F |
| 0.6680499911019240 | 0.8350800275685089 | 0.0631899982792987 | F | F | F |
| 0.1665399968694743 | 0.9999399781380731 | 0.0571300014870246 | F | F | F |
| 0.1647700071264779 | 0.3318099975501880 | 0.0630899965588227 | F | F | F |
| 0.1649599969669993 | 0.6678699851318157 | 0.0628300011305356 | F | F | F |
| 0.4995799959066858 | 0.9996899962566772 | 0.0621200017787373 | F | F | F |
| 0.5004400015054742 | 0.3341600000654878 | 0.0623699985549493 | F | F | F |
| 0.8335300087518434 | 0.0006599999888621 | 0.0593699999149706 | F | F | F |
| 0.8335000276869380 | 0.3339900076717370 | 0.0614399984580416 | F | F | F |
| 0.8345299959310495 | 0.6670100092759697 | 0.0590099990224289 | F | F | F |
| 0.1655199974769772 | 0.1649699956211279 | 0.0588000007106046 | F | F | F |
| 0.1689099967855014 | 0.5010300278786701 | 0.0695900022914344 | F | F | F |
| 0.1661600023717327 | 0.8336899876319350 | 0.0583200007559981 | F | F | F |
| 0.5000299811505329 | 0.1666100025210966 | 0.0600900016626156 | F | F | F |
| 0.4982599914069894 | 0.5016000270702463 | 0.0694800019188762 | F | F | F |
| 0.4988099932978187 | 0.8309299945801385 | 0.0696299970120435 | F | F | F |

|                    |                    |                    |   |   |   |
|--------------------|--------------------|--------------------|---|---|---|
| 0.8332399726153312 | 0.1666100025210966 | 0.0610099993636766 | F | F | F |
| 0.8332399726178181 | 0.4998199939886163 | 0.0600900016626156 | F | F | F |
| 0.8348900079967692 | 0.8343399763111563 | 0.0588699989124351 | F | F | F |
| 0.0547900013529556 | 0.1105799972670667 | 0.0582499988478276 | F | F | F |
| 0.0574500001527696 | 0.4450300037547379 | 0.0647099986659398 | F | F | F |
| 0.0552599988734528 | 0.7778099775364282 | 0.0577500015516321 | F | F | F |
| 0.3890799879994375 | 0.1110199987696632 | 0.0590200014557141 | F | F | F |
| 0.3847500086142546 | 0.4413599968097515 | 0.069889999278808  | F | F | F |
| 0.3856300115637481 | 0.7774099707386029 | 0.0697999968969185 | F | F | F |
| 0.7216899990961423 | 0.1110199987696632 | 0.0616299994282770 | F | F | F |
| 0.7213600277433585 | 0.4436900019336107 | 0.0609799995887954 | F | F | F |
| 0.7239000201781849 | 0.7793800235195363 | 0.0617300011113215 | F | F | F |
| 0.0548500008969128 | 0.2779600024177142 | 0.0611100010467140 | F | F | F |
| 0.0548699982635696 | 0.6113299727824142 | 0.0609100013869721 | F | F | F |
| 0.0557399988174794 | 0.9441199898966843 | 0.0569700002542319 | F | F | F |
| 0.3894000053534441 | 0.2770200073944125 | 0.0612200014192723 | F | F | F |
| 0.3885200023536157 | 0.9449700116936768 | 0.0609200000764787 | F | F | F |
| 0.7219600081768291 | 0.2778800130081720 | 0.0612899996210956 | F | F | F |
| 0.7228400111134903 | 0.6104599833518947 | 0.0612800009690204 | F | F | F |
| 0.7218999862732431 | 0.9449999928237744 | 0.0611900016818296 | F | F | F |
| 0.2224700004002287 | 0.1112700029890163 | 0.0579399988155274 | F | F | F |
| 0.2239000052058842 | 0.4420799910817479 | 0.0698800012383671 | F | F | F |
| 0.2217099964610867 | 0.7781400084212819 | 0.0611599981631770 | F | F | F |
| 0.5554500222519394 | 0.1106600016727199 | 0.0609599985034350 | F | F | F |
| 0.5538799763018645 | 0.4459800124308089 | 0.0648500025197052 | F | F | F |
| 0.5577600002220393 | 0.7759199738370555 | 0.0699200034090950 | F | F | F |
| 0.8886299729346163 | 0.1112200022076308 | 0.0597000010326383 | F | F | F |
| 0.8891900181671417 | 0.4444000124669500 | 0.0609400011618462 | F | F | F |
| 0.8885800242332564 | 0.7773900031831715 | 0.0579899996383304 | F | F | F |
| 0.2204699963058161 | 0.2759700119173587 | 0.0616400018241308 | F | F | F |
| 0.2224200070404621 | 0.6142200231952089 | 0.0697799995553297 | F | F | F |
| 0.2220399975825629 | 0.9445899725293785 | 0.0577399991557783 | F | F | F |
| 0.5561599731237834 | 0.2784900069045193 | 0.0609700009367202 | F | F | F |
| 0.5584899783382440 | 0.6151199936777303 | 0.0699099972694697 | F | F | F |
| 0.5548200011515050 | 0.9423800111137410 | 0.0647599995261743 | F | F | F |
| 0.8888199925564066 | 0.2781499922028985 | 0.0615999996534029 | F | F | F |
| 0.8888300061197185 | 0.6107800006620749 | 0.0590399987973029 | F | F | F |
| 0.8892800212255736 | 0.9450600147559953 | 0.0582900010185554 | F | F | F |
| 0.2502057181502524 | 0.6591067215280279 | 0.2365414843399728 | T | T | T |
| 0.1570903035946044 | 0.6174449004251451 | 0.2582169716147137 | T | T | T |
| 0.3334703260707893 | 0.7544864580509788 | 0.2365834810972113 | T | T | T |
| 0.0701122243907576 | 0.5669319946521808 | 0.2740837045240614 | T | T | T |

Structure10

\*OCHO+CO

1.0000000000000000

|                     |                     |                     |
|---------------------|---------------------|---------------------|
| 14.7840003966999998 | 0.0000000000000000  | 0.0000000000000000  |
| -7.3920001983999999 | 12.8033199130999993 | 0.0000000000000000  |
| 0.0000000000000000  | 0.0000000000000000  | 26.7110004425000014 |

|    |   |    |   |   |
|----|---|----|---|---|
| Cu | N | C  | O | H |
| 4  | 9 | 64 | 3 | 1 |

Selective dynamics

Direct

|                    |                    |                    |   |   |   |
|--------------------|--------------------|--------------------|---|---|---|
| 0.3883999883824316 | 0.6109899878387068 | 0.1237199976883616 | F | F | F |
| 0.4801292302763676 | 0.6727473991699738 | 0.2007558694714578 | T | T | T |
| 0.3126228867497272 | 0.5216193722785052 | 0.2001477051711841 | T | T | T |
| 0.3290414438176519 | 0.6885182970674119 | 0.1897143673496114 | T | T | T |
| 0.3273999989159151 | 0.6724299788206594 | 0.0770300030666817 | F | F | F |
| 0.3273600042078257 | 0.4895400106801233 | 0.0762199982880674 | F | F | F |
| 0.5102499723826810 | 0.6724500060481091 | 0.0761599987757577 | F | F | F |
| 0.9996700287274507 | 0.0001800000324650 | 0.0573600009216477 | F | F | F |
| 0.0003299999634265 | 0.3344300090962307 | 0.0625099986649431 | F | F | F |
| 0.9996899962509573 | 0.6666100025562471 | 0.0586999989901287 | F | F | F |
| 0.3332400024166660 | 0.0001599999854633 | 0.0586900003380535 | F | F | F |
| 0.6654199958038518 | 0.9995099902101501 | 0.0625599995251847 | F | F | F |
| 0.6666899919723832 | 0.3331600129459886 | 0.0612300001087860 | F | F | F |
| 0.3321700096157301 | 0.3312500119332853 | 0.0634699985367249 | F | F | F |
| 0.6686199903697627 | 0.6676899790852886 | 0.0635500028781806 | F | F | F |
| 0.9991999865008054 | 0.1663299948336885 | 0.0593199990547291 | F | F | F |
| 0.0001500000141448 | 0.5002700090658863 | 0.0620899982600847 | F | F | F |
| 0.9999099969734431 | 0.8333100080615523 | 0.0571499988286135 | F | F | F |
| 0.3328500091896487 | 0.1653199940614059 | 0.0589599981996258 | F | F | F |
| 0.3319799900125986 | 0.8348799943726348 | 0.0628399997826108 | F | F | F |
| 0.6658499836809995 | 0.1663399934903538 | 0.0614599995434091 | F | F | F |
| 0.6657000184196491 | 0.4994199871907909 | 0.0623999982923920 | F | F | F |
| 0.6680499911019240 | 0.8350800275685089 | 0.0631899982792987 | F | F | F |
| 0.1665399968694743 | 0.9999399781380731 | 0.0571300014870246 | F | F | F |
| 0.1647700071264779 | 0.3318099975501880 | 0.0630899965588227 | F | F | F |
| 0.1649599969669993 | 0.6678699851318157 | 0.0628300011305356 | F | F | F |
| 0.4995799959066858 | 0.9996899962566772 | 0.0621200017787373 | F | F | F |
| 0.5004400015054742 | 0.3341600000654878 | 0.0623699985549493 | F | F | F |
| 0.8335300087518434 | 0.0006599999888621 | 0.0593699999149706 | F | F | F |
| 0.8335000276869380 | 0.3339900076717370 | 0.0614399984580416 | F | F | F |
| 0.8345299959310495 | 0.6670100092759697 | 0.0590099990224289 | F | F | F |
| 0.1655199974769772 | 0.1649699956211279 | 0.0588000007106046 | F | F | F |
| 0.1689099967855014 | 0.5010300278786701 | 0.0695900022914344 | F | F | F |
| 0.1661600023717327 | 0.8336899876319350 | 0.0583200007559981 | F | F | F |
| 0.5000299811505329 | 0.1666100025210966 | 0.0600900016626156 | F | F | F |

|                    |                    |                    |   |   |   |
|--------------------|--------------------|--------------------|---|---|---|
| 0.4982599914069894 | 0.5016000270702463 | 0.0694800019188762 | F | F | F |
| 0.4988099932978187 | 0.8309299945801385 | 0.0696299970120435 | F | F | F |
| 0.8332399726153312 | 0.1666100025210966 | 0.0610099993636766 | F | F | F |
| 0.8332399726178181 | 0.4998199939886163 | 0.0600900016626156 | F | F | F |
| 0.8348900079967692 | 0.8343399763111563 | 0.0588699989124351 | F | F | F |
| 0.0547900013529556 | 0.1105799972670667 | 0.0582499988478276 | F | F | F |
| 0.0574500001527696 | 0.4450300037547379 | 0.0647099986659398 | F | F | F |
| 0.0552599988734528 | 0.7778099775364282 | 0.0577500015516321 | F | F | F |
| 0.3890799879994375 | 0.1110199987696632 | 0.0590200014557141 | F | F | F |
| 0.3847500086142546 | 0.4413599968097515 | 0.0698899999278808 | F | F | F |
| 0.3856300115637481 | 0.7774099707386029 | 0.0697999968969185 | F | F | F |
| 0.7216899990961423 | 0.1110199987696632 | 0.0616299994282770 | F | F | F |
| 0.7213600277433585 | 0.4436900019336107 | 0.0609799995887954 | F | F | F |
| 0.7239000201781849 | 0.7793800235195363 | 0.0617300011113215 | F | F | F |
| 0.0548500008969128 | 0.2779600024177142 | 0.0611100010467140 | F | F | F |
| 0.0548699982635696 | 0.6113299727824142 | 0.0609100013869721 | F | F | F |
| 0.0557399988174794 | 0.9441199898966843 | 0.0569700002542319 | F | F | F |
| 0.3894000053534441 | 0.2770200073944125 | 0.0612200014192723 | F | F | F |
| 0.3885200023536157 | 0.9449700116936768 | 0.0609200000764787 | F | F | F |
| 0.7219600081768291 | 0.2778800130081720 | 0.0612899996210956 | F | F | F |
| 0.7228400111134903 | 0.6104599833518947 | 0.0612800009690204 | F | F | F |
| 0.7218999862732431 | 0.9449999928237744 | 0.0611900016818296 | F | F | F |
| 0.2224700004002287 | 0.1112700029890163 | 0.0579399988155274 | F | F | F |
| 0.2239000052058842 | 0.4420799910817479 | 0.0698800012383671 | F | F | F |
| 0.2217099964610867 | 0.7781400084212819 | 0.0611599981631770 | F | F | F |
| 0.5554500222519394 | 0.1106600016727199 | 0.0609599985034350 | F | F | F |
| 0.5538799763018645 | 0.4459800124308089 | 0.0648500025197052 | F | F | F |
| 0.5577600002220393 | 0.7759199738370555 | 0.0699200034090950 | F | F | F |
| 0.8886299729346163 | 0.1112200022076308 | 0.0597000010326383 | F | F | F |
| 0.8891900181671417 | 0.4444000124669500 | 0.0609400011618462 | F | F | F |
| 0.8885800242332564 | 0.7773900031831715 | 0.0579899996383304 | F | F | F |
| 0.2204699963058161 | 0.2759700119173587 | 0.0616400018241308 | F | F | F |
| 0.2224200070404621 | 0.6142200231952089 | 0.0697799995553297 | F | F | F |
| 0.2220399975825629 | 0.9445899725293785 | 0.0577399991557783 | F | F | F |
| 0.5561599731237834 | 0.2784900069045193 | 0.0609700009367202 | F | F | F |
| 0.5584899783382440 | 0.6151199936777303 | 0.0699099972694697 | F | F | F |
| 0.5548200011515050 | 0.9423800111137410 | 0.0647599995261743 | F | F | F |
| 0.8888199925564066 | 0.2781499922028985 | 0.0615999996534029 | F | F | F |
| 0.8888300061197185 | 0.6107800006620749 | 0.0590399987973029 | F | F | F |
| 0.8892800212255736 | 0.9450600147559953 | 0.0582900010185554 | F | F | F |
| 0.1641662991338774 | 0.7357471035186246 | 0.1940053667639016 | T | T | T |
| 0.1896429024492453 | 0.7750210843058722 | 0.3271400540938331 | T | T | T |
| 0.1204728881041825 | 0.7832348679552322 | 0.1791653036793025 | T | T | T |
| 0.2639123852282966 | 0.7681246656118482 | 0.1884378894305946 | T | T | T |

|                    |                    |                    |   |   |   |
|--------------------|--------------------|--------------------|---|---|---|
| 0.2060611975331726 | 0.8581903551751553 | 0.3341615647505596 | T | T | T |
| 0.1183084097391353 | 0.6595383494428355 | 0.2140336378916995 | T | T | T |

Structure11

TS4

1.0000000000000000

|                     |                    |                    |
|---------------------|--------------------|--------------------|
| 14.7840003966999998 | 0.0000000000000000 | 0.0000000000000000 |
|---------------------|--------------------|--------------------|

|                     |                     |                    |
|---------------------|---------------------|--------------------|
| -7.3920001983999999 | 12.8033199130999993 | 0.0000000000000000 |
|---------------------|---------------------|--------------------|

|                    |                    |                     |
|--------------------|--------------------|---------------------|
| 0.0000000000000000 | 0.0000000000000000 | 26.7110004425000014 |
|--------------------|--------------------|---------------------|

|    |   |    |   |   |
|----|---|----|---|---|
| Cu | N | C  | O | H |
| 4  | 9 | 64 | 3 | 1 |

Selective dynamics

Direct

|                    |                    |                    |   |   |   |
|--------------------|--------------------|--------------------|---|---|---|
| 0.3883999883824319 | 0.6109899878387083 | 0.1237199976883616 | F | F | F |
| 0.4673142199894835 | 0.6198586308743931 | 0.2017965136632612 | T | T | T |
| 0.2826011107511517 | 0.5289011567062322 | 0.1958920871254385 | T | T | T |
| 0.3769073237911778 | 0.7150634162597528 | 0.1954033274950313 | T | T | T |
| 0.3273999989159152 | 0.6724299788206597 | 0.0770300030666817 | F | F | F |
| 0.3273600042078260 | 0.4895400106801243 | 0.0762199982880674 | F | F | F |
| 0.5102499723826811 | 0.6724500060481094 | 0.0761599987757577 | F | F | F |
| 0.9996700286598081 | 0.0001800000324650 | 0.0573600009216477 | F | F | F |
| 0.0003299999634262 | 0.3344300090962307 | 0.0625099986649431 | F | F | F |
| 0.9996899962509580 | 0.6666100025562472 | 0.0586999989901287 | F | F | F |
| 0.3332400024166660 | 0.0001599999854633 | 0.0586900003380535 | F | F | F |
| 0.6654199958038519 | 0.9995099902101519 | 0.0625599995251847 | F | F | F |
| 0.6666899919723834 | 0.3331600129459886 | 0.0612300001087860 | F | F | F |
| 0.3321700096157302 | 0.3312500119332855 | 0.0634699985367248 | F | F | F |
| 0.6686199903697627 | 0.6676899790852888 | 0.0635500028781806 | F | F | F |
| 0.9991999865008062 | 0.1663299948336886 | 0.0593199990547290 | F | F | F |
| 0.0001500000141444 | 0.5002700090658865 | 0.0620899982600846 | F | F | F |
| 0.9999099969734443 | 0.8333100080615541 | 0.0571499988286135 | F | F | F |
| 0.3328500091896487 | 0.1653199940614059 | 0.0589599981996258 | F | F | F |
| 0.3319799900125990 | 0.8348799943726366 | 0.0628399997826108 | F | F | F |
| 0.6658499836809995 | 0.1663399934903538 | 0.0614599995434091 | F | F | F |
| 0.6657000184196500 | 0.4994199871907919 | 0.0623999982923919 | F | F | F |
| 0.6680499911019246 | 0.8350800275685106 | 0.0631899982792987 | F | F | F |
| 0.1665399968694743 | 0.9999399781380749 | 0.0571300014870246 | F | F | F |
| 0.1647700071264776 | 0.3318099975501881 | 0.0630899965588227 | F | F | F |
| 0.1649599969669993 | 0.6678699851318157 | 0.0628300011305356 | F | F | F |
| 0.4995799959066861 | 0.9996899962566790 | 0.0621200017787373 | F | F | F |
| 0.5004400015054744 | 0.3341600000654880 | 0.0623699985549493 | F | F | F |
| 0.8335300088194799 | 0.0006599999888621 | 0.0593699999149706 | F | F | F |
| 0.8335000276869382 | 0.3339900076717370 | 0.0614399984580416 | F | F | F |
| 0.8345299959310497 | 0.6670100092759701 | 0.0590099990224289 | F | F | F |

|                    |                    |                    |   |   |   |
|--------------------|--------------------|--------------------|---|---|---|
| 0.1655199974769772 | 0.1649699956211280 | 0.0588000007106046 | F | F | F |
| 0.1689099967855015 | 0.5010300278786706 | 0.0695900022914344 | F | F | F |
| 0.1661600023717328 | 0.8336899876319368 | 0.0583200007559981 | F | F | F |
| 0.5000299811505329 | 0.1666100025210966 | 0.0600900016626156 | F | F | F |
| 0.4982599914069894 | 0.5016000270702463 | 0.0694800019188762 | F | F | F |
| 0.4988099932978192 | 0.8309299945801403 | 0.0696299970120435 | F | F | F |
| 0.8332399726153312 | 0.1666100025210966 | 0.0610099993636766 | F | F | F |
| 0.8332399726178190 | 0.4998199939886173 | 0.0600900016626156 | F | F | F |
| 0.8348900079967702 | 0.8343399763111581 | 0.0588699989124350 | F | F | F |
| 0.0547900013529557 | 0.1105799972670669 | 0.0582499988478275 | F | F | F |
| 0.0574500001527695 | 0.4450300037547388 | 0.0647099986659398 | F | F | F |
| 0.0552599988734522 | 0.7778099775364286 | 0.0577500015516321 | F | F | F |
| 0.3890799879994379 | 0.1110199987696634 | 0.0590200014557141 | F | F | F |
| 0.3847500086142551 | 0.4413599968097524 | 0.0698899999278808 | F | F | F |
| 0.3856300115637482 | 0.7774099707386032 | 0.0697999968969185 | F | F | F |
| 0.7216899990961428 | 0.1110199987696634 | 0.0616299994282770 | F | F | F |
| 0.7213600277433585 | 0.4436900019336107 | 0.0609799995887954 | F | F | F |
| 0.7239000201781851 | 0.7793800235195367 | 0.0617300011113215 | F | F | F |
| 0.0548500008969130 | 0.2779600024177144 | 0.0611100010467140 | F | F | F |
| 0.0548699982635697 | 0.6113299727824156 | 0.0609100013869721 | F | F | F |
| 0.0557399988174792 | 0.9441199898966861 | 0.0569700002542319 | F | F | F |
| 0.3894000053534443 | 0.2770200073944125 | 0.0612200014192723 | F | F | F |
| 0.3885200023536159 | 0.9449700116936787 | 0.0609200000764787 | F | F | F |
| 0.7219600081768296 | 0.2778800130081721 | 0.0612899996210956 | F | F | F |
| 0.7228400111134917 | 0.6104599833518950 | 0.0612800009690204 | F | F | F |
| 0.7218999862732436 | 0.9449999928237762 | 0.0611900016818296 | F | F | F |
| 0.2224700004002289 | 0.1112700029890166 | 0.0579399988155273 | F | F | F |
| 0.2239000052058842 | 0.4420799910817479 | 0.0698800012383671 | F | F | F |
| 0.2217099964610868 | 0.7781400084212837 | 0.0611599981631770 | F | F | F |
| 0.5554500222519398 | 0.1106600016727202 | 0.0609599985034350 | F | F | F |
| 0.5538799763018648 | 0.4459800124308098 | 0.0648500025197052 | F | F | F |
| 0.5577600002220393 | 0.7759199738370555 | 0.0699200034090950 | F | F | F |
| 0.8886299729346173 | 0.1112200022076311 | 0.0597000010326383 | F | F | F |
| 0.8891900181671427 | 0.4444000124669510 | 0.0609400011618462 | F | F | F |
| 0.8885800242332579 | 0.7773900031831716 | 0.0579899996383304 | F | F | F |
| 0.2204699963058162 | 0.2759700119173589 | 0.0616400018241308 | F | F | F |
| 0.2224200070404621 | 0.6142200231952091 | 0.0697799995553297 | F | F | F |
| 0.2220399975825630 | 0.9445899725293803 | 0.0577399991557783 | F | F | F |
| 0.5561599731237837 | 0.2784900069045198 | 0.0609700009367202 | F | F | F |
| 0.5584899783382445 | 0.6151199936777317 | 0.0699099972694697 | F | F | F |
| 0.5548200011515053 | 0.9423800111137428 | 0.0647599995261743 | F | F | F |
| 0.8888199925564068 | 0.2781499922028985 | 0.0615999996534029 | F | F | F |
| 0.8888300061197194 | 0.6107800006620764 | 0.0590399987973029 | F | F | F |
| 0.8892800212255747 | 0.9450600147559971 | 0.0582900010185554 | F | F | F |

|                    |                    |                    |   |   |   |
|--------------------|--------------------|--------------------|---|---|---|
| 0.1849855348392153 | 0.7031063000584467 | 0.2167702792629285 | T | T | T |
| 0.2220597702647501 | 0.7697231602052578 | 0.2680554506305453 | T | T | T |
| 0.1197784749956156 | 0.7105075152600379 | 0.1902281213725944 | T | T | T |
| 0.3026235479062593 | 0.7835619589735356 | 0.2124670856195736 | T | T | T |
| 0.2414085715374152 | 0.8378451132126570 | 0.2957790004621877 | T | T | T |
| 0.1761244139296485 | 0.6236592279113035 | 0.2239259324226130 | T | T | T |

Structure12

\*OCOCHO

1.0000000000000000

|                     |                     |                     |
|---------------------|---------------------|---------------------|
| 14.7840003966999998 | 0.0000000000000000  | 0.0000000000000000  |
| -7.3920001983999999 | 12.8033199130999993 | 0.0000000000000000  |
| 0.0000000000000000  | 0.0000000000000000  | 26.7110004425000014 |

|    |   |    |   |   |
|----|---|----|---|---|
| Cu | N | C  | O | H |
| 4  | 9 | 64 | 3 | 1 |

Selective dynamics

Direct

|                    |                    |                    |   |   |   |
|--------------------|--------------------|--------------------|---|---|---|
| 0.3883999883824316 | 0.6109899878387068 | 0.1237199976883616 | F | F | F |
| 0.4484384266647232 | 0.5858773804468611 | 0.2008905794273000 | T | T | T |
| 0.2706367918087608 | 0.5452029298293490 | 0.1941422901103948 | T | T | T |
| 0.4059417710759569 | 0.7214819242549124 | 0.1963902397400545 | T | T | T |
| 0.3273999989159151 | 0.6724299788206594 | 0.0770300030666817 | F | F | F |
| 0.3273600042078257 | 0.4895400106801233 | 0.0762199982880674 | F | F | F |
| 0.5102499723826810 | 0.6724500060481091 | 0.0761599987757577 | F | F | F |
| 0.9996700287274507 | 0.0001800000324650 | 0.0573600009216477 | F | F | F |
| 0.0003299999634265 | 0.3344300090962307 | 0.0625099986649431 | F | F | F |
| 0.9996899962509573 | 0.6666100025562471 | 0.0586999989901287 | F | F | F |
| 0.3332400024166660 | 0.0001599999854633 | 0.0586900003380535 | F | F | F |
| 0.6654199958038518 | 0.9995099902101501 | 0.0625599995251847 | F | F | F |
| 0.6666899919723832 | 0.3331600129459886 | 0.0612300001087860 | F | F | F |
| 0.3321700096157301 | 0.3312500119332853 | 0.0634699985367249 | F | F | F |
| 0.6686199903697627 | 0.6676899790852886 | 0.0635500028781806 | F | F | F |
| 0.9991999865008054 | 0.1663299948336885 | 0.0593199990547291 | F | F | F |
| 0.0001500000141448 | 0.5002700090658863 | 0.0620899982600847 | F | F | F |
| 0.9999099969734431 | 0.8333100080615523 | 0.0571499988286135 | F | F | F |
| 0.3328500091896487 | 0.1653199940614059 | 0.0589599981996258 | F | F | F |
| 0.3319799900125986 | 0.8348799943726348 | 0.0628399997826108 | F | F | F |
| 0.6658499836809995 | 0.1663399934903538 | 0.0614599995434091 | F | F | F |
| 0.6657000184196491 | 0.4994199871907909 | 0.0623999982923920 | F | F | F |
| 0.6680499911019240 | 0.8350800275685089 | 0.0631899982792987 | F | F | F |
| 0.1665399968694743 | 0.9999399781380731 | 0.0571300014870246 | F | F | F |
| 0.1647700071264779 | 0.3318099975501880 | 0.0630899965588227 | F | F | F |
| 0.1649599969669993 | 0.6678699851318157 | 0.0628300011305356 | F | F | F |
| 0.4995799959066858 | 0.9996899962566772 | 0.0621200017787373 | F | F | F |

|                    |                    |                    |   |   |   |
|--------------------|--------------------|--------------------|---|---|---|
| 0.5004400015054742 | 0.3341600000654878 | 0.0623699985549493 | F | F | F |
| 0.8335300087518434 | 0.0006599999888621 | 0.0593699999149706 | F | F | F |
| 0.8335000276869380 | 0.3339900076717370 | 0.0614399984580416 | F | F | F |
| 0.8345299959310495 | 0.6670100092759697 | 0.0590099990224289 | F | F | F |
| 0.1655199974769772 | 0.1649699956211279 | 0.0588000007106046 | F | F | F |
| 0.1689099967855014 | 0.5010300278786701 | 0.0695900022914344 | F | F | F |
| 0.1661600023717327 | 0.8336899876319350 | 0.0583200007559981 | F | F | F |
| 0.5000299811505329 | 0.1666100025210966 | 0.0600900016626156 | F | F | F |
| 0.4982599914069894 | 0.5016000270702463 | 0.0694800019188762 | F | F | F |
| 0.4988099932978187 | 0.8309299945801385 | 0.0696299970120435 | F | F | F |
| 0.8332399726153312 | 0.1666100025210966 | 0.0610099993636766 | F | F | F |
| 0.8332399726178181 | 0.4998199939886163 | 0.0600900016626156 | F | F | F |
| 0.8348900079967692 | 0.8343399763111563 | 0.0588699989124351 | F | F | F |
| 0.0547900013529556 | 0.1105799972670667 | 0.0582499988478276 | F | F | F |
| 0.0574500001527696 | 0.4450300037547379 | 0.0647099986659398 | F | F | F |
| 0.0552599988734528 | 0.7778099775364282 | 0.0577500015516321 | F | F | F |
| 0.3890799879994375 | 0.1110199987696632 | 0.0590200014557141 | F | F | F |
| 0.3847500086142546 | 0.4413599968097515 | 0.0698899999278808 | F | F | F |
| 0.3856300115637481 | 0.7774099707386029 | 0.0697999968969185 | F | F | F |
| 0.7216899990961423 | 0.1110199987696632 | 0.0616299994282770 | F | F | F |
| 0.7213600277433585 | 0.4436900019336107 | 0.0609799995887954 | F | F | F |
| 0.7239000201781849 | 0.7793800235195363 | 0.0617300011113215 | F | F | F |
| 0.0548500008969128 | 0.2779600024177142 | 0.0611100010467140 | F | F | F |
| 0.0548699982635696 | 0.6113299727824142 | 0.0609100013869721 | F | F | F |
| 0.0557399988174794 | 0.9441199898966843 | 0.0569700002542319 | F | F | F |
| 0.3894000053534441 | 0.2770200073944125 | 0.0612200014192723 | F | F | F |
| 0.3885200023536157 | 0.9449700116936768 | 0.0609200000764787 | F | F | F |
| 0.7219600081768291 | 0.2778800130081720 | 0.0612899996210956 | F | F | F |
| 0.7228400111134903 | 0.6104599833518947 | 0.0612800009690204 | F | F | F |
| 0.7218999862732431 | 0.9449999928237744 | 0.0611900016818296 | F | F | F |
| 0.2224700004002287 | 0.1112700029890163 | 0.0579399988155274 | F | F | F |
| 0.2239000052058842 | 0.4420799910817479 | 0.0698800012383671 | F | F | F |
| 0.2217099964610867 | 0.7781400084212819 | 0.0611599981631770 | F | F | F |
| 0.5554500222519394 | 0.1106600016727199 | 0.0609599985034350 | F | F | F |
| 0.5538799763018645 | 0.4459800124308089 | 0.0648500025197052 | F | F | F |
| 0.5577600002220393 | 0.7759199738370555 | 0.0699200034090950 | F | F | F |
| 0.8886299729346163 | 0.1112200022076308 | 0.0597000010326383 | F | F | F |
| 0.8891900181671417 | 0.4444000124669500 | 0.0609400011618462 | F | F | F |
| 0.8885800242332564 | 0.7773900031831715 | 0.0579899996383304 | F | F | F |
| 0.2204699963058161 | 0.2759700119173587 | 0.0616400018241308 | F | F | F |
| 0.2224200070404621 | 0.6142200231952089 | 0.0697799995553297 | F | F | F |
| 0.2220399975825629 | 0.9445899725293785 | 0.0577399991557783 | F | F | F |
| 0.5561599731237834 | 0.2784900069045193 | 0.0609700009367202 | F | F | F |
| 0.5584899783382440 | 0.6151199936777303 | 0.0699099972694697 | F | F | F |



|                    |                    |                    |   |   |   |
|--------------------|--------------------|--------------------|---|---|---|
| 0.5548200011515050 | 0.9423800111137410 | 0.0647599995261743 | F | F | F |
| 0.8888199925564066 | 0.2781499922028985 | 0.0615999996534029 | F | F | F |
| 0.8888300061197185 | 0.6107800006620749 | 0.0590399987973029 | F | F | F |
| 0.8892800212255736 | 0.9450600147559953 | 0.0582900010185554 | F | F | F |
| 0.1920234004016005 | 0.6861713845792677 | 0.2190348645460142 | T | T | T |
| 0.2791764400576177 | 0.7864742698689012 | 0.2440163029151038 | T | T | T |
| 0.1236460289363406 | 0.6806745038432190 | 0.1920532461285731 | T | T | T |
| 0.3735379275672392 | 0.8134449210074440 | 0.2295009383318054 | T | T | T |
| 0.2527195269597287 | 0.8313467761420120 | 0.2742353443830129 | T | T | T |
| 0.1977498643598479 | 0.6111423255433798 | 0.2275473327118529 | T | T | T |

### Structure13

#### TS5

1.0000000000000000

|                     |                     |                     |
|---------------------|---------------------|---------------------|
| 14.7840003966999998 | 0.0000000000000000  | 0.0000000000000000  |
| -7.3920001983999999 | 12.8033199130999993 | 0.0000000000000000  |
| 0.0000000000000000  | 0.0000000000000000  | 26.7110004425000014 |

|    |   |    |   |
|----|---|----|---|
| Cu | N | C  | O |
| 4  | 9 | 64 | 4 |

Selective dynamics

Direct

|                    |                    |                    |   |   |   |
|--------------------|--------------------|--------------------|---|---|---|
| 0.3883999883824316 | 0.6109899878387214 | 0.1237199976883616 | F | F | F |
| 0.4581397746374792 | 0.5603408990063095 | 0.1906225778131222 | T | T | T |
| 0.2856181612898299 | 0.5260941954779479 | 0.2057416463605923 | T | T | T |
| 0.4272675537958449 | 0.7054042705927115 | 0.1998820519943147 | T | T | T |
| 0.3273999989159152 | 0.6724299788206597 | 0.0770300030666817 | F | F | F |
| 0.3273600042078263 | 0.4895400106801452 | 0.0762199982880674 | F | F | F |
| 0.5102499723826811 | 0.6724500060481094 | 0.0761599987757577 | F | F | F |
| 0.9996700287274507 | 0.0001800000324650 | 0.0573600009216477 | F | F | F |
| 0.0003299999634263 | 0.3344300090962307 | 0.0625099986649431 | F | F | F |
| 0.9996899962509573 | 0.6666100025562472 | 0.0586999989901287 | F | F | F |
| 0.3332400024166660 | 0.0001599999854633 | 0.0586900003380535 | F | F | F |
| 0.6654199958038518 | 0.9995099902101866 | 0.0625599995251847 | F | F | F |
| 0.6666899919723832 | 0.3331600129459886 | 0.0612300001087860 | F | F | F |
| 0.3321700096157301 | 0.3312500119332855 | 0.0634699985367248 | F | F | F |
| 0.6686199903697628 | 0.6676899790852888 | 0.0635500028781806 | F | F | F |
| 0.9991999865008060 | 0.1663299948336886 | 0.0593199990547290 | F | F | F |
| 0.0001500000141334 | 0.5002700090658865 | 0.0620899982600846 | F | F | F |
| 0.9999099969734652 | 0.8333100080615888 | 0.0571499988286135 | F | F | F |
| 0.3328500091896487 | 0.1653199940614059 | 0.0589599981996258 | F | F | F |
| 0.3319799900125986 | 0.8348799943726715 | 0.0628399997826108 | F | F | F |
| 0.6658499836809995 | 0.1663399934903538 | 0.0614599995434091 | F | F | F |
| 0.6657000184196504 | 0.4994199871908128 | 0.0623999982923919 | F | F | F |
| 0.6680499911019240 | 0.8350800275685243 | 0.0631899982792987 | F | F | F |

|                    |                    |                    |   |   |   |
|--------------------|--------------------|--------------------|---|---|---|
| 0.1665399968694744 | 0.9999399781381098 | 0.0571300014870246 | F | F | F |
| 0.1647700071264779 | 0.3318099975501881 | 0.0630899965588227 | F | F | F |
| 0.1649599969669993 | 0.6678699851318157 | 0.0628300011305356 | F | F | F |
| 0.4995799959066893 | 0.9996899962567138 | 0.0621200017787373 | F | F | F |
| 0.5004400015054742 | 0.3341600000654880 | 0.0623699985549493 | F | F | F |
| 0.8335300087518440 | 0.0006599999888621 | 0.0593699999149706 | F | F | F |
| 0.8335000276869380 | 0.3339900076717370 | 0.0614399984580416 | F | F | F |
| 0.8345299959310500 | 0.6670100092759701 | 0.0590099990224289 | F | F | F |
| 0.1655199974769772 | 0.1649699956211280 | 0.0588000007106046 | F | F | F |
| 0.1689099967855014 | 0.5010300278786706 | 0.0695900022914344 | F | F | F |
| 0.1661600023717327 | 0.8336899876319591 | 0.0583200007559981 | F | F | F |
| 0.5000299811505329 | 0.1666100025210966 | 0.0600900016626156 | F | F | F |
| 0.4982599914069894 | 0.5016000270702463 | 0.0694800019188762 | F | F | F |
| 0.4988099932978204 | 0.8309299945801666 | 0.0696299970120435 | F | F | F |
| 0.8332399726153312 | 0.1666100025210966 | 0.0610099993636766 | F | F | F |
| 0.8332399726178293 | 0.4998199939886382 | 0.0600900016626156 | F | F | F |
| 0.8348900079967698 | 0.8343399763111928 | 0.0588699989124350 | F | F | F |
| 0.0547900013529561 | 0.1105799972670686 | 0.0582499988478275 | F | F | F |
| 0.0574500001527694 | 0.4450300037547393 | 0.0647099986659398 | F | F | F |
| 0.0552599988734528 | 0.7778099775364286 | 0.0577500015516321 | F | F | F |
| 0.3890799879994401 | 0.1110199987696651 | 0.0590200014557141 | F | F | F |
| 0.3847500086142550 | 0.4413599968097733 | 0.0698899999278808 | F | F | F |
| 0.3856300115637483 | 0.7774099707386032 | 0.0697999968969185 | F | F | F |
| 0.7216899990961438 | 0.1110199987696651 | 0.0616299994282770 | F | F | F |
| 0.7213600277433585 | 0.4436900019336107 | 0.0609799995887954 | F | F | F |
| 0.7239000201781849 | 0.7793800235195367 | 0.0617300011113215 | F | F | F |
| 0.0548500008969129 | 0.2779600024177144 | 0.0611100010467140 | F | F | F |
| 0.0548699982635698 | 0.6113299727824170 | 0.0609100013869721 | F | F | F |
| 0.0557399988174794 | 0.9441199898967209 | 0.0569700002542319 | F | F | F |
| 0.3894000053534442 | 0.2770200073944125 | 0.0612200014192723 | F | F | F |
| 0.3885200023536164 | 0.9449700116937133 | 0.0609200000764787 | F | F | F |
| 0.7219600081768291 | 0.2778800130081721 | 0.0612899996210956 | F | F | F |
| 0.7228400111134907 | 0.6104599833518950 | 0.0612800009690204 | F | F | F |
| 0.7218999862732441 | 0.9449999928238111 | 0.0611900016818296 | F | F | F |
| 0.2224700004002299 | 0.1112700029890182 | 0.0579399988155273 | F | F | F |
| 0.2239000052058842 | 0.4420799910817479 | 0.0698800012383671 | F | F | F |
| 0.2217099964610742 | 0.7781400084212852 | 0.0611599981631770 | F | F | F |
| 0.5554500222519416 | 0.1106600016727218 | 0.0609599985034350 | F | F | F |
| 0.5538799763018654 | 0.4459800124308307 | 0.0648500025197052 | F | F | F |
| 0.5577600002220393 | 0.7759199738370555 | 0.0699200034090950 | F | F | F |
| 0.8886299729346283 | 0.1112200022076328 | 0.0597000010326383 | F | F | F |
| 0.8891900181671419 | 0.4444000124669573 | 0.0609400011618462 | F | F | F |
| 0.8885800242332567 | 0.7773900031831716 | 0.0579899996383304 | F | F | F |
| 0.2204699963058162 | 0.2759700119173589 | 0.0616400018241308 | F | F | F |

|                    |                    |                    |   |   |   |
|--------------------|--------------------|--------------------|---|---|---|
| 0.2224200070404621 | 0.6142200231952091 | 0.0697799995553297 | F | F | F |
| 0.2220399975825631 | 0.9445899725294151 | 0.0577399991557783 | F | F | F |
| 0.5561599731237840 | 0.2784900069045198 | 0.0609700009367202 | F | F | F |
| 0.5584899783382440 | 0.6151199936777521 | 0.0699099972694697 | F | F | F |
| 0.5548200011515050 | 0.9423800111137777 | 0.0647599995261743 | F | F | F |
| 0.8888199925564066 | 0.2781499922028985 | 0.0615999996534029 | F | F | F |
| 0.8888300061197190 | 0.6107800006620824 | 0.0590399987973029 | F | F | F |
| 0.8892800212255745 | 0.9450600147560320 | 0.0582900010185554 | F | F | F |
| 0.3062054898363181 | 0.7030361767420877 | 0.2682240953917274 | T | T | T |
| 0.2561395663395236 | 0.6363601544545424 | 0.2194827067313799 | T | T | T |
| 0.2522091740869952 | 0.6903404436430746 | 0.3057426919552981 | T | T | T |
| 0.4044853701729892 | 0.7685384393311556 | 0.2612904619621569 | T | T | T |
| 0.2424294477953431 | 0.3991967814923780 | 0.2242392278865521 | T | T | T |
| 0.1867141525050759 | 0.6421449414135512 | 0.1971157947276627 | T | T | T |

### Structure14

\*O<sub>3</sub>+\*CO<sub>2</sub>\*

1.0000000000000000

|                     |                     |                     |
|---------------------|---------------------|---------------------|
| 14.7840003966999998 | 0.0000000000000000  | 0.0000000000000000  |
| -7.3920001983999999 | 12.8033199130999993 | 0.0000000000000000  |
| 0.0000000000000000  | 0.0000000000000000  | 26.7110004425000014 |

Cu N C O  
4 9 64 4

Selective dynamics

Direct

|                    |                    |                    |   |   |   |
|--------------------|--------------------|--------------------|---|---|---|
| 0.3883999883824316 | 0.6109899878387068 | 0.1237199976883616 | F | F | F |
| 0.4312258063663581 | 0.5449092408217646 | 0.1972897752262702 | T | T | T |
| 0.2615849237317285 | 0.5440090536885697 | 0.2011994219733609 | T | T | T |
| 0.4226888265521631 | 0.7086030148445142 | 0.2000004834173896 | T | T | T |
| 0.3273999989159151 | 0.6724299788206594 | 0.0770300030666817 | F | F | F |
| 0.3273600042078257 | 0.4895400106801233 | 0.0762199982880674 | F | F | F |
| 0.5102499723826810 | 0.6724500060481091 | 0.0761599987757577 | F | F | F |
| 0.9996700287274507 | 0.0001800000324650 | 0.0573600009216477 | F | F | F |
| 0.0003299999634265 | 0.3344300090962307 | 0.0625099986649431 | F | F | F |
| 0.9996899962509573 | 0.6666100025562471 | 0.0586999989901287 | F | F | F |
| 0.3332400024166660 | 0.0001599999854633 | 0.0586900003380535 | F | F | F |
| 0.6654199958038518 | 0.9995099902101501 | 0.0625599995251847 | F | F | F |
| 0.6666899919723832 | 0.3331600129459886 | 0.0612300001087860 | F | F | F |
| 0.3321700096157301 | 0.3312500119332853 | 0.0634699985367249 | F | F | F |
| 0.6686199903697627 | 0.6676899790852886 | 0.0635500028781806 | F | F | F |
| 0.9991999865008054 | 0.1663299948336885 | 0.0593199990547291 | F | F | F |
| 0.0001500000141448 | 0.5002700090658863 | 0.0620899982600847 | F | F | F |
| 0.9999099969734431 | 0.8333100080615523 | 0.0571499988286135 | F | F | F |
| 0.3328500091896487 | 0.1653199940614059 | 0.0589599981996258 | F | F | F |

|                    |                    |                    |   |   |   |
|--------------------|--------------------|--------------------|---|---|---|
| 0.3319799900125986 | 0.8348799943726348 | 0.0628399997826108 | F | F | F |
| 0.6658499836809995 | 0.1663399934903538 | 0.0614599995434091 | F | F | F |
| 0.6657000184196491 | 0.4994199871907909 | 0.0623999982923920 | F | F | F |
| 0.6680499911019240 | 0.8350800275685089 | 0.0631899982792987 | F | F | F |
| 0.1665399968694743 | 0.9999399781380731 | 0.0571300014870246 | F | F | F |
| 0.1647700071264779 | 0.3318099975501880 | 0.0630899965588227 | F | F | F |
| 0.1649599969669993 | 0.6678699851318157 | 0.0628300011305356 | F | F | F |
| 0.4995799959066858 | 0.9996899962566772 | 0.0621200017787373 | F | F | F |
| 0.5004400015054742 | 0.3341600000654878 | 0.0623699985549493 | F | F | F |
| 0.8335300087518434 | 0.0006599999888621 | 0.0593699999149706 | F | F | F |
| 0.8335000276869380 | 0.3339900076717370 | 0.0614399984580416 | F | F | F |
| 0.8345299959310495 | 0.6670100092759697 | 0.0590099990224289 | F | F | F |
| 0.1655199974769772 | 0.1649699956211279 | 0.0588000007106046 | F | F | F |
| 0.1689099967855014 | 0.5010300278786701 | 0.0695900022914344 | F | F | F |
| 0.1661600023717327 | 0.8336899876319350 | 0.0583200007559981 | F | F | F |
| 0.5000299811505329 | 0.1666100025210966 | 0.0600900016626156 | F | F | F |
| 0.4982599914069894 | 0.5016000270702463 | 0.0694800019188762 | F | F | F |
| 0.4988099932978187 | 0.8309299945801385 | 0.0696299970120435 | F | F | F |
| 0.8332399726153312 | 0.1666100025210966 | 0.0610099993636766 | F | F | F |
| 0.8332399726178181 | 0.4998199939886163 | 0.0600900016626156 | F | F | F |
| 0.8348900079967692 | 0.8343399763111563 | 0.0588699989124351 | F | F | F |
| 0.0547900013529556 | 0.1105799972670667 | 0.0582499988478276 | F | F | F |
| 0.0574500001527696 | 0.4450300037547379 | 0.0647099986659398 | F | F | F |
| 0.0552599988734528 | 0.7778099775364282 | 0.0577500015516321 | F | F | F |
| 0.3890799879994375 | 0.1110199987696632 | 0.0590200014557141 | F | F | F |
| 0.3847500086142546 | 0.4413599968097515 | 0.0698899999278808 | F | F | F |
| 0.3856300115637481 | 0.7774099707386029 | 0.0697999968969185 | F | F | F |
| 0.7216899990961423 | 0.1110199987696632 | 0.0616299994282770 | F | F | F |
| 0.7213600277433585 | 0.4436900019336107 | 0.0609799995887954 | F | F | F |
| 0.7239000201781849 | 0.7793800235195363 | 0.0617300011113215 | F | F | F |
| 0.0548500008969128 | 0.2779600024177142 | 0.0611100010467140 | F | F | F |
| 0.0548699982635696 | 0.6113299727824142 | 0.0609100013869721 | F | F | F |
| 0.0557399988174794 | 0.9441199898966843 | 0.0569700002542319 | F | F | F |
| 0.3894000053534441 | 0.2770200073944125 | 0.0612200014192723 | F | F | F |
| 0.3885200023536157 | 0.9449700116936768 | 0.0609200000764787 | F | F | F |
| 0.7219600081768291 | 0.2778800130081720 | 0.0612899996210956 | F | F | F |
| 0.7228400111134903 | 0.6104599833518947 | 0.0612800009690204 | F | F | F |
| 0.7218999862732431 | 0.9449999928237744 | 0.0611900016818296 | F | F | F |
| 0.2224700004002287 | 0.1112700029890163 | 0.0579399988155274 | F | F | F |
| 0.2239000052058842 | 0.4420799910817479 | 0.0698800012383671 | F | F | F |
| 0.2217099964610867 | 0.7781400084212819 | 0.0611599981631770 | F | F | F |
| 0.5554500222519394 | 0.1106600016727199 | 0.0609599985034350 | F | F | F |
| 0.5538799763018645 | 0.4459800124308089 | 0.0648500025197052 | F | F | F |
| 0.5577600002220393 | 0.7759199738370555 | 0.0699200034090950 | F | F | F |

|                    |                    |                    |   |   |   |
|--------------------|--------------------|--------------------|---|---|---|
| 0.8886299729346163 | 0.1112200022076308 | 0.0597000010326383 | F | F | F |
| 0.8891900181671417 | 0.4444000124669500 | 0.0609400011618462 | F | F | F |
| 0.8885800242332564 | 0.7773900031831715 | 0.0579899996383304 | F | F | F |
| 0.2204699963058161 | 0.2759700119173587 | 0.0616400018241308 | F | F | F |
| 0.2224200070404621 | 0.6142200231952089 | 0.0697799995553297 | F | F | F |
| 0.2220399975825629 | 0.9445899725293785 | 0.0577399991557783 | F | F | F |
| 0.5561599731237834 | 0.2784900069045193 | 0.0609700009367202 | F | F | F |
| 0.5584899783382440 | 0.6151199936777303 | 0.0699099972694697 | F | F | F |
| 0.5548200011515050 | 0.9423800111137410 | 0.0647599995261743 | F | F | F |
| 0.8888199925564066 | 0.2781499922028985 | 0.0615999996534029 | F | F | F |
| 0.8888300061197185 | 0.6107800006620749 | 0.0590399987973029 | F | F | F |
| 0.8892800212255736 | 0.9450600147559953 | 0.0582900010185554 | F | F | F |
| 0.2728756054005387 | 0.7356598060840628 | 0.2437348330254357 | T | T | T |
| 0.2151021237643997 | 0.6430533361053821 | 0.2035664547537805 | T | T | T |
| 0.2186688667939253 | 0.7500420900270921 | 0.2737204236291947 | T | T | T |
| 0.3734274570476822 | 0.7859060072629069 | 0.2381391663396365 | T | T | T |
| 0.2980515281770629 | 0.4444791386902827 | 0.2059899239174974 | T | T | T |
| 0.1506450888077651 | 0.6441787372038281 | 0.1754795260371914 | T | T | T |

Structure15

\*O<sub>2</sub>+\*COCOO\*

1.0000000000000000

|                     |                     |                     |
|---------------------|---------------------|---------------------|
| 14.7840003966999998 | 0.0000000000000000  | 0.0000000000000000  |
| -7.3920001983999999 | 12.8033199130999993 | 0.0000000000000000  |
| 0.0000000000000000  | 0.0000000000000000  | 26.7110004425000014 |

Cu N C O  
4 9 64 4

Selective dynamics

Direct

|                    |                    |                    |   |   |   |
|--------------------|--------------------|--------------------|---|---|---|
| 0.3883999883824316 | 0.6109899878387068 | 0.1237199976883616 | F | F | F |
| 0.3865129165322657 | 0.5056742038813115 | 0.1945195358867301 | T | T | T |
| 0.2632350212094252 | 0.5834357145345279 | 0.1973237877890122 | T | T | T |
| 0.4590127600777317 | 0.6919769112837684 | 0.2043504199379414 | T | T | T |
| 0.3273999989159151 | 0.6724299788206594 | 0.0770300030666817 | F | F | F |
| 0.3273600042078257 | 0.4895400106801233 | 0.0762199982880674 | F | F | F |
| 0.5102499723826810 | 0.6724500060481091 | 0.0761599987757577 | F | F | F |
| 0.9996700287274507 | 0.0001800000324650 | 0.0573600009216477 | F | F | F |
| 0.0003299999634265 | 0.3344300090962307 | 0.0625099986649431 | F | F | F |
| 0.9996899962509573 | 0.6666100025562471 | 0.0586999989901287 | F | F | F |
| 0.3332400024166660 | 0.0001599999854633 | 0.0586900003380535 | F | F | F |
| 0.6654199958038518 | 0.9995099902101501 | 0.0625599995251847 | F | F | F |
| 0.6666899919723832 | 0.3331600129459886 | 0.0612300001087860 | F | F | F |
| 0.3321700096157301 | 0.3312500119332853 | 0.0634699985367249 | F | F | F |
| 0.6686199903697627 | 0.6676899790852886 | 0.0635500028781806 | F | F | F |

|                    |                    |                    |   |   |   |
|--------------------|--------------------|--------------------|---|---|---|
| 0.9991999865008054 | 0.1663299948336885 | 0.0593199990547291 | F | F | F |
| 0.0001500000141448 | 0.5002700090658863 | 0.0620899982600847 | F | F | F |
| 0.9999099969734431 | 0.8333100080615523 | 0.0571499988286135 | F | F | F |
| 0.3328500091896487 | 0.1653199940614059 | 0.0589599981996258 | F | F | F |
| 0.3319799900125986 | 0.8348799943726348 | 0.0628399997826108 | F | F | F |
| 0.6658499836809995 | 0.1663399934903538 | 0.0614599995434091 | F | F | F |
| 0.6657000184196491 | 0.4994199871907909 | 0.0623999982923920 | F | F | F |
| 0.6680499911019240 | 0.8350800275685089 | 0.0631899982792987 | F | F | F |
| 0.1665399968694743 | 0.9999399781380731 | 0.0571300014870246 | F | F | F |
| 0.1647700071264779 | 0.3318099975501880 | 0.0630899965588227 | F | F | F |
| 0.1649599969669993 | 0.6678699851318157 | 0.0628300011305356 | F | F | F |
| 0.4995799959066858 | 0.9996899962566772 | 0.0621200017787373 | F | F | F |
| 0.5004400015054742 | 0.3341600000654878 | 0.0623699985549493 | F | F | F |
| 0.8335300087518434 | 0.0006599999888621 | 0.0593699999149706 | F | F | F |
| 0.8335000276869380 | 0.3339900076717370 | 0.0614399984580416 | F | F | F |
| 0.8345299959310495 | 0.6670100092759697 | 0.0590099990224289 | F | F | F |
| 0.1655199974769772 | 0.1649699956211279 | 0.0588000007106046 | F | F | F |
| 0.1689099967855014 | 0.5010300278786701 | 0.0695900022914344 | F | F | F |
| 0.1661600023717327 | 0.8336899876319350 | 0.0583200007559981 | F | F | F |
| 0.5000299811505329 | 0.1666100025210966 | 0.0600900016626156 | F | F | F |
| 0.4982599914069894 | 0.5016000270702463 | 0.0694800019188762 | F | F | F |
| 0.4988099932978187 | 0.8309299945801385 | 0.0696299970120435 | F | F | F |
| 0.8332399726153312 | 0.1666100025210966 | 0.0610099993636766 | F | F | F |
| 0.8332399726178181 | 0.4998199939886163 | 0.0600900016626156 | F | F | F |
| 0.8348900079967692 | 0.8343399763111563 | 0.0588699989124351 | F | F | F |
| 0.0547900013529556 | 0.1105799972670667 | 0.0582499988478276 | F | F | F |
| 0.0574500001527696 | 0.4450300037547379 | 0.0647099986659398 | F | F | F |
| 0.0552599988734528 | 0.7778099775364282 | 0.0577500015516321 | F | F | F |
| 0.3890799879994375 | 0.1110199987696632 | 0.0590200014557141 | F | F | F |
| 0.3847500086142546 | 0.4413599968097515 | 0.0698899999278808 | F | F | F |
| 0.3856300115637481 | 0.7774099707386029 | 0.0697999968969185 | F | F | F |
| 0.7216899990961423 | 0.1110199987696632 | 0.0616299994282770 | F | F | F |
| 0.7213600277433585 | 0.4436900019336107 | 0.0609799995887954 | F | F | F |
| 0.7239000201781849 | 0.7793800235195363 | 0.0617300011113215 | F | F | F |
| 0.0548500008969128 | 0.2779600024177142 | 0.0611100010467140 | F | F | F |
| 0.0548699982635696 | 0.6113299727824142 | 0.0609100013869721 | F | F | F |
| 0.0557399988174794 | 0.9441199898966843 | 0.0569700002542319 | F | F | F |
| 0.3894000053534441 | 0.2770200073944125 | 0.0612200014192723 | F | F | F |
| 0.3885200023536157 | 0.9449700116936768 | 0.0609200000764787 | F | F | F |
| 0.7219600081768291 | 0.2778800130081720 | 0.0612899996210956 | F | F | F |
| 0.7228400111134903 | 0.6104599833518947 | 0.0612800009690204 | F | F | F |
| 0.7218999862732431 | 0.9449999928237744 | 0.0611900016818296 | F | F | F |
| 0.2224700004002287 | 0.1112700029890163 | 0.0579399988155274 | F | F | F |
| 0.2239000052058842 | 0.4420799910817479 | 0.0698800012383671 | F | F | F |

|                    |                     |                    |   |   |   |
|--------------------|---------------------|--------------------|---|---|---|
| 0.2217099964610867 | 0.7781400084212819  | 0.0611599981631770 | F | F | F |
| 0.5554500222519394 | 0.1106600016727199  | 0.0609599985034350 | F | F | F |
| 0.5538799763018645 | 0.4459800124308089  | 0.0648500025197052 | F | F | F |
| 0.5577600002220393 | 0.7759199738370555  | 0.0699200034090950 | F | F | F |
| 0.8886299729346163 | 0.1112200022076308  | 0.0597000010326383 | F | F | F |
| 0.8891900181671417 | 0.4444000124669500  | 0.0609400011618462 | F | F | F |
| 0.8885800242332564 | 0.7773900031831715  | 0.0579899996383304 | F | F | F |
| 0.2204699963058161 | 0.2759700119173587  | 0.0616400018241308 | F | F | F |
| 0.2224200070404621 | 0.6142200231952089  | 0.0697799995553297 | F | F | F |
| 0.2220399975825629 | 0.9445899725293785  | 0.0577399991557783 | F | F | F |
| 0.5561599731237834 | 0.2784900069045193  | 0.0609700009367202 | F | F | F |
| 0.5584899783382440 | 0.6151199936777303  | 0.0699099972694697 | F | F | F |
| 0.5548200011515050 | 0.94238001111137410 | 0.0647599995261743 | F | F | F |
| 0.8888199925564066 | 0.2781499922028985  | 0.0615999996534029 | F | F | F |
| 0.8888300061197185 | 0.6107800006620749  | 0.0590399987973029 | F | F | F |
| 0.8892800212255736 | 0.9450600147559953  | 0.0582900010185554 | F | F | F |
| 0.2728503678423365 | 0.3942813413870608  | 0.2304382966602358 | T | T | T |
| 0.1670685360430287 | 0.3657006025170011  | 0.2011912592016913 | T | T | T |
| 0.2718468927000408 | 0.3590270892422520  | 0.2712753139988570 | T | T | T |
| 0.3556065173844535 | 0.7217427069880971  | 0.1991467667283167 | T | T | T |
| 0.1531800089325983 | 0.4439900177943749  | 0.1932058966149539 | T | T | T |
| 0.1118098066859614 | 0.2740864783757456  | 0.1884560781635788 | T | T | T |

### Structure16

\*O<sub>4</sub>+\*COCOO\*

1.0000000000000000

|                     |                     |                     |   |
|---------------------|---------------------|---------------------|---|
| 14.7840003966999998 | 0.0000000000000000  | 0.0000000000000000  |   |
| -7.3920001983999999 | 12.8033199130999993 | 0.0000000000000000  |   |
| 0.0000000000000000  | 0.0000000000000000  | 26.7110004425000014 |   |
| Cu                  | N                   | C                   | O |
| 4                   | 9                   | 64                  | 4 |

### Selective dynamics

Direct

|                    |                    |                    |   |   |   |
|--------------------|--------------------|--------------------|---|---|---|
| 0.3883999883824316 | 0.6109899878387068 | 0.1237199976883616 | F | F | F |
| 0.5052683435153659 | 0.6529751588608614 | 0.2207541814528568 | T | T | T |
| 0.3205785551253504 | 0.5775996235236369 | 0.2181803039154686 | T | T | T |
| 0.4007423593829499 | 0.7470998527927413 | 0.1771352364416578 | T | T | T |
| 0.3273999989159151 | 0.6724299788206594 | 0.0770300030666817 | F | F | F |
| 0.3273600042078257 | 0.4895400106801233 | 0.0762199982880674 | F | F | F |
| 0.5102499723826810 | 0.6724500060481091 | 0.0761599987757577 | F | F | F |
| 0.9996700287274507 | 0.0001800000324650 | 0.0573600009216477 | F | F | F |
| 0.0003299999634265 | 0.3344300090962307 | 0.0625099986649431 | F | F | F |
| 0.9996899962509573 | 0.6666100025562471 | 0.0586999989901287 | F | F | F |
| 0.3332400024166660 | 0.0001599999854633 | 0.0586900003380535 | F | F | F |

|                    |                    |                    |   |   |   |
|--------------------|--------------------|--------------------|---|---|---|
| 0.6654199958038518 | 0.9995099902101501 | 0.0625599995251847 | F | F | F |
| 0.6666899919723832 | 0.3331600129459886 | 0.0612300001087860 | F | F | F |
| 0.3321700096157301 | 0.3312500119332853 | 0.0634699985367249 | F | F | F |
| 0.6686199903697627 | 0.6676899790852886 | 0.0635500028781806 | F | F | F |
| 0.9991999865008054 | 0.1663299948336885 | 0.0593199990547291 | F | F | F |
| 0.0001500000141448 | 0.5002700090658863 | 0.0620899982600847 | F | F | F |
| 0.9999099969734431 | 0.8333100080615523 | 0.0571499988286135 | F | F | F |
| 0.3328500091896487 | 0.1653199940614059 | 0.0589599981996258 | F | F | F |
| 0.3319799900125986 | 0.8348799943726348 | 0.0628399997826108 | F | F | F |
| 0.6658499836809995 | 0.1663399934903538 | 0.0614599995434091 | F | F | F |
| 0.6657000184196491 | 0.4994199871907909 | 0.0623999982923920 | F | F | F |
| 0.6680499911019240 | 0.8350800275685089 | 0.0631899982792987 | F | F | F |
| 0.1665399968694743 | 0.9999399781380731 | 0.0571300014870246 | F | F | F |
| 0.1647700071264779 | 0.3318099975501880 | 0.0630899965588227 | F | F | F |
| 0.1649599969669993 | 0.6678699851318157 | 0.0628300011305356 | F | F | F |
| 0.4995799959066858 | 0.9996899962566772 | 0.0621200017787373 | F | F | F |
| 0.5004400015054742 | 0.3341600000654878 | 0.0623699985549493 | F | F | F |
| 0.8335300087518434 | 0.0006599999888621 | 0.0593699999149706 | F | F | F |
| 0.8335000276869380 | 0.3339900076717370 | 0.0614399984580416 | F | F | F |
| 0.8345299959310495 | 0.6670100092759697 | 0.0590099990224289 | F | F | F |
| 0.1655199974769772 | 0.1649699956211279 | 0.0588000007106046 | F | F | F |
| 0.1689099967855014 | 0.5010300278786701 | 0.0695900022914344 | F | F | F |
| 0.1661600023717327 | 0.8336899876319350 | 0.0583200007559981 | F | F | F |
| 0.5000299811505329 | 0.1666100025210966 | 0.0600900016626156 | F | F | F |
| 0.4982599914069894 | 0.5016000270702463 | 0.0694800019188762 | F | F | F |
| 0.4988099932978187 | 0.8309299945801385 | 0.0696299970120435 | F | F | F |
| 0.8332399726153312 | 0.1666100025210966 | 0.0610099993636766 | F | F | F |
| 0.8332399726178181 | 0.4998199939886163 | 0.0600900016626156 | F | F | F |
| 0.8348900079967692 | 0.8343399763111563 | 0.0588699989124351 | F | F | F |
| 0.0547900013529556 | 0.1105799972670667 | 0.0582499988478276 | F | F | F |
| 0.0574500001527696 | 0.4450300037547379 | 0.0647099986659398 | F | F | F |
| 0.0552599988734528 | 0.7778099775364282 | 0.0577500015516321 | F | F | F |
| 0.3890799879994375 | 0.1110199987696632 | 0.0590200014557141 | F | F | F |
| 0.3847500086142546 | 0.4413599968097515 | 0.0698899999278808 | F | F | F |
| 0.3856300115637481 | 0.7774099707386029 | 0.0697999968969185 | F | F | F |
| 0.7216899990961423 | 0.1110199987696632 | 0.0616299994282770 | F | F | F |
| 0.7213600277433585 | 0.4436900019336107 | 0.0609799995887954 | F | F | F |
| 0.7239000201781849 | 0.7793800235195363 | 0.0617300011113215 | F | F | F |
| 0.0548500008969128 | 0.2779600024177142 | 0.0611100010467140 | F | F | F |
| 0.0548699982635696 | 0.6113299727824142 | 0.0609100013869721 | F | F | F |
| 0.0557399988174794 | 0.9441199898966843 | 0.0569700002542319 | F | F | F |
| 0.3894000053534441 | 0.2770200073944125 | 0.0612200014192723 | F | F | F |
| 0.3885200023536157 | 0.9449700116936768 | 0.0609200000764787 | F | F | F |
| 0.7219600081768291 | 0.2778800130081720 | 0.0612899996210956 | F | F | F |



|                    |                    |                    |   |   |   |
|--------------------|--------------------|--------------------|---|---|---|
| 0.7228400111134903 | 0.6104599833518947 | 0.0612800009690204 | F | F | F |
| 0.7218999862732431 | 0.9449999928237744 | 0.0611900016818296 | F | F | F |
| 0.2224700004002287 | 0.1112700029890163 | 0.0579399988155274 | F | F | F |
| 0.2239000052058842 | 0.4420799910817479 | 0.0698800012383671 | F | F | F |
| 0.2217099964610867 | 0.7781400084212819 | 0.0611599981631770 | F | F | F |
| 0.5554500222519394 | 0.1106600016727199 | 0.0609599985034350 | F | F | F |
| 0.5538799763018645 | 0.4459800124308089 | 0.0648500025197052 | F | F | F |
| 0.5577600002220393 | 0.7759199738370555 | 0.0699200034090950 | F | F | F |
| 0.8886299729346163 | 0.1112200022076308 | 0.0597000010326383 | F | F | F |
| 0.8891900181671417 | 0.4444000124669500 | 0.0609400011618462 | F | F | F |
| 0.8885800242332564 | 0.7773900031831715 | 0.0579899996383304 | F | F | F |
| 0.2204699963058161 | 0.2759700119173587 | 0.0616400018241308 | F | F | F |
| 0.2224200070404621 | 0.6142200231952089 | 0.0697799995553297 | F | F | F |
| 0.2220399975825629 | 0.9445899725293785 | 0.0577399991557783 | F | F | F |
| 0.5561599731237834 | 0.2784900069045193 | 0.0609700009367202 | F | F | F |
| 0.5584899783382440 | 0.6151199936777303 | 0.0699099972694697 | F | F | F |
| 0.5548200011515050 | 0.9423800111137410 | 0.0647599995261743 | F | F | F |
| 0.8888199925564066 | 0.2781499922028985 | 0.0615999996534029 | F | F | F |
| 0.8888300061197185 | 0.6107800006620749 | 0.0590399987973029 | F | F | F |
| 0.8892800212255736 | 0.9450600147559953 | 0.0582900010185554 | F | F | F |
| 0.4513645489139435 | 0.7693414382566065 | 0.2595263419464637 | T | T | T |
| 0.3406590650953982 | 0.6721536586174632 | 0.2726025806558124 | T | T | T |
| 0.5339910969164949 | 0.7639174910679084 | 0.2685583643000584 | T | T | T |
| 0.4478358928858323 | 0.8433286427586468 | 0.2361236229244619 | T | T | T |
| 0.2928713882491008 | 0.6650779949115996 | 0.3107268935974568 | T | T | T |
| 0.4119170789406781 | 0.5448143066493412 | 0.1799878814886793 | T | T | T |

### Structure17

\*O<sub>1</sub>+\*COCOO\*

1.0000000000000000

|                     |                     |                     |
|---------------------|---------------------|---------------------|
| 14.7840003966999998 | 0.0000000000000000  | 0.0000000000000000  |
| -7.3920001983999999 | 12.8033199130999993 | 0.0000000000000000  |
| 0.0000000000000000  | 0.0000000000000000  | 26.7110004425000014 |

Cu    N    C    O  
4      9    64    4

### Selective dynamics

Direct

|                    |                    |                    |   |   |   |
|--------------------|--------------------|--------------------|---|---|---|
| 0.3883999883824316 | 0.6109899878387068 | 0.1237199976883616 | F | F | F |
| 0.4255349698356273 | 0.5234668917697988 | 0.1966439159803162 | T | T | T |
| 0.2715629082360690 | 0.5477226671641934 | 0.1935580706425726 | T | T | T |
| 0.4433499715848465 | 0.6894773806607613 | 0.2051921777557635 | T | T | T |
| 0.3273999989159151 | 0.6724299788206594 | 0.0770300030666817 | F | F | F |
| 0.3273600042078257 | 0.4895400106801233 | 0.0762199982880674 | F | F | F |
| 0.5102499723826810 | 0.6724500060481091 | 0.0761599987757577 | F | F | F |

|                    |                    |                    |   |   |   |
|--------------------|--------------------|--------------------|---|---|---|
| 0.9996700287274507 | 0.0001800000324650 | 0.0573600009216477 | F | F | F |
| 0.0003299999634265 | 0.3344300090962307 | 0.0625099986649431 | F | F | F |
| 0.9996899962509573 | 0.6666100025562471 | 0.0586999989901287 | F | F | F |
| 0.3332400024166660 | 0.0001599999854633 | 0.0586900003380535 | F | F | F |
| 0.6654199958038518 | 0.9995099902101501 | 0.0625599995251847 | F | F | F |
| 0.6666899919723832 | 0.3331600129459886 | 0.0612300001087860 | F | F | F |
| 0.3321700096157301 | 0.3312500119332853 | 0.0634699985367249 | F | F | F |
| 0.6686199903697627 | 0.6676899790852886 | 0.0635500028781806 | F | F | F |
| 0.9991999865008054 | 0.1663299948336885 | 0.0593199990547291 | F | F | F |
| 0.0001500000141448 | 0.5002700090658863 | 0.0620899982600847 | F | F | F |
| 0.9999099969734431 | 0.8333100080615523 | 0.0571499988286135 | F | F | F |
| 0.3328500091896487 | 0.1653199940614059 | 0.0589599981996258 | F | F | F |
| 0.3319799900125986 | 0.8348799943726348 | 0.0628399997826108 | F | F | F |
| 0.6658499836809995 | 0.1663399934903538 | 0.0614599995434091 | F | F | F |
| 0.6657000184196491 | 0.4994199871907909 | 0.0623999982923920 | F | F | F |
| 0.6680499911019240 | 0.8350800275685089 | 0.0631899982792987 | F | F | F |
| 0.1665399968694743 | 0.9999399781380731 | 0.0571300014870246 | F | F | F |
| 0.1647700071264779 | 0.3318099975501880 | 0.0630899965588227 | F | F | F |
| 0.1649599969669993 | 0.6678699851318157 | 0.0628300011305356 | F | F | F |
| 0.4995799959066858 | 0.9996899962566772 | 0.0621200017787373 | F | F | F |
| 0.5004400015054742 | 0.3341600000654878 | 0.0623699985549493 | F | F | F |
| 0.8335300087518434 | 0.0006599999888621 | 0.0593699999149706 | F | F | F |
| 0.8335000276869380 | 0.3339900076717370 | 0.0614399984580416 | F | F | F |
| 0.8345299959310495 | 0.6670100092759697 | 0.0590099990224289 | F | F | F |
| 0.1655199974769772 | 0.1649699956211279 | 0.0588000007106046 | F | F | F |
| 0.1689099967855014 | 0.5010300278786701 | 0.0695900022914344 | F | F | F |
| 0.1661600023717327 | 0.8336899876319350 | 0.0583200007559981 | F | F | F |
| 0.5000299811505329 | 0.1666100025210966 | 0.0600900016626156 | F | F | F |
| 0.4982599914069894 | 0.5016000270702463 | 0.0694800019188762 | F | F | F |
| 0.4988099932978187 | 0.8309299945801385 | 0.0696299970120435 | F | F | F |
| 0.8332399726153312 | 0.1666100025210966 | 0.0610099993636766 | F | F | F |
| 0.8332399726178181 | 0.4998199939886163 | 0.0600900016626156 | F | F | F |
| 0.8348900079967692 | 0.8343399763111563 | 0.0588699989124351 | F | F | F |
| 0.0547900013529556 | 0.1105799972670667 | 0.0582499988478276 | F | F | F |
| 0.0574500001527696 | 0.4450300037547379 | 0.0647099986659398 | F | F | F |
| 0.0552599988734528 | 0.7778099775364282 | 0.0577500015516321 | F | F | F |
| 0.3890799879994375 | 0.1110199987696632 | 0.0590200014557141 | F | F | F |
| 0.3847500086142546 | 0.4413599968097515 | 0.0698899999278808 | F | F | F |
| 0.3856300115637481 | 0.7774099707386029 | 0.0697999968969185 | F | F | F |
| 0.7216899990961423 | 0.1110199987696632 | 0.0616299994282770 | F | F | F |
| 0.7213600277433585 | 0.4436900019336107 | 0.0609799995887954 | F | F | F |
| 0.7239000201781849 | 0.7793800235195363 | 0.0617300011113215 | F | F | F |
| 0.0548500008969128 | 0.2779600024177142 | 0.0611100010467140 | F | F | F |
| 0.0548699982635696 | 0.6113299727824142 | 0.0609100013869721 | F | F | F |

|                    |                    |                    |   |   |   |
|--------------------|--------------------|--------------------|---|---|---|
| 0.0557399988174794 | 0.9441199898966843 | 0.0569700002542319 | F | F | F |
| 0.3894000053534441 | 0.2770200073944125 | 0.0612200014192723 | F | F | F |
| 0.3885200023536157 | 0.9449700116936768 | 0.0609200000764787 | F | F | F |
| 0.7219600081768291 | 0.2778800130081720 | 0.0612899996210956 | F | F | F |
| 0.7228400111134903 | 0.6104599833518947 | 0.0612800009690204 | F | F | F |
| 0.7218999862732431 | 0.9449999928237744 | 0.0611900016818296 | F | F | F |
| 0.2224700004002287 | 0.1112700029890163 | 0.0579399988155274 | F | F | F |
| 0.2239000052058842 | 0.4420799910817479 | 0.0698800012383671 | F | F | F |
| 0.2217099964610867 | 0.7781400084212819 | 0.0611599981631770 | F | F | F |
| 0.5554500222519394 | 0.1106600016727199 | 0.0609599985034350 | F | F | F |
| 0.5538799763018645 | 0.4459800124308089 | 0.0648500025197052 | F | F | F |
| 0.5577600002220393 | 0.7759199738370555 | 0.0699200034090950 | F | F | F |
| 0.8886299729346163 | 0.1112200022076308 | 0.0597000010326383 | F | F | F |
| 0.8891900181671417 | 0.4444000124669500 | 0.0609400011618462 | F | F | F |
| 0.8885800242332564 | 0.7773900031831715 | 0.0579899996383304 | F | F | F |
| 0.2204699963058161 | 0.2759700119173587 | 0.0616400018241308 | F | F | F |
| 0.2224200070404621 | 0.6142200231952089 | 0.0697799995553297 | F | F | F |
| 0.2220399975825629 | 0.9445899725293785 | 0.0577399991557783 | F | F | F |
| 0.5561599731237834 | 0.2784900069045193 | 0.0609700009367202 | F | F | F |
| 0.5584899783382440 | 0.6151199936777303 | 0.0699099972694697 | F | F | F |
| 0.5548200011515050 | 0.9423800111137410 | 0.0647599995261743 | F | F | F |
| 0.8888199925564066 | 0.2781499922028985 | 0.0615999996534029 | F | F | F |
| 0.8888300061197185 | 0.6107800006620749 | 0.0590399987973029 | F | F | F |
| 0.8892800212255736 | 0.9450600147559953 | 0.0582900010185554 | F | F | F |
| 0.4197405106566217 | 0.5771280711957104 | 0.2642402472677715 | T | T | T |
| 0.3024118232024054 | 0.5072515296351555 | 0.2886697714780911 | T | T | T |
| 0.4406067674506771 | 0.4275614935587548 | 0.1694874648613622 | T | T | T |
| 0.4958963076659514 | 0.6335299141939407 | 0.2894508277360004 | T | T | T |
| 0.2272743353379022 | 0.4960545555977966 | 0.2600360259860531 | T | T | T |
| 0.3008370964315632 | 0.4751781221879634 | 0.3309085579706980 | T | T | T |

### Formation of ethane

Structure01

\*OH+\*COCOO\*

1.0000000000000000

|                     |                     |                     |
|---------------------|---------------------|---------------------|
| 14.7840003966999998 | 0.0000000000000000  | 0.0000000000000000  |
| -7.3920001983999999 | 12.8033199130999993 | 0.0000000000000000  |
| 0.0000000000000000  | 0.0000000000000000  | 26.7110004425000014 |

| Cu | N | C  | O | H |
|----|---|----|---|---|
| 4  | 9 | 64 | 4 | 1 |

Selective dynamics

Direct

|                    |                    |                    |   |   |   |
|--------------------|--------------------|--------------------|---|---|---|
| 0.3883999883824316 | 0.6109899878387068 | 0.1237199976883616 | F | F | F |
| 0.3714566102558433 | 0.5270735896249249 | 0.2004776891079399 | T | T | T |

|                    |                    |                    |   |   |   |
|--------------------|--------------------|--------------------|---|---|---|
| 0.2218673323105973 | 0.5345025627548590 | 0.2357200479872127 | T | T | T |
| 0.3791990746686262 | 0.6915308211467057 | 0.1986018289717798 | T | T | T |
| 0.3273999989159151 | 0.6724299788206594 | 0.0770300030666817 | F | F | F |
| 0.3273600042078257 | 0.4895400106801233 | 0.0762199982880674 | F | F | F |
| 0.5102499723826810 | 0.6724500060481091 | 0.0761599987757577 | F | F | F |
| 0.9996700287274507 | 0.0001800000324650 | 0.0573600009216477 | F | F | F |
| 0.0003299999634265 | 0.3344300090962307 | 0.0625099986649431 | F | F | F |
| 0.9996899962509573 | 0.6666100025562471 | 0.0586999989901287 | F | F | F |
| 0.3332400024166660 | 0.000159999854633  | 0.0586900003380535 | F | F | F |
| 0.6654199958038518 | 0.9995099902101501 | 0.0625599995251847 | F | F | F |
| 0.6666899919723832 | 0.3331600129459886 | 0.0612300001087860 | F | F | F |
| 0.3321700096157301 | 0.3312500119332853 | 0.0634699985367249 | F | F | F |
| 0.6686199903697627 | 0.6676899790852886 | 0.0635500028781806 | F | F | F |
| 0.9991999865008054 | 0.1663299948336885 | 0.0593199990547291 | F | F | F |
| 0.0001500000141448 | 0.5002700090658863 | 0.0620899982600847 | F | F | F |
| 0.9999099969734431 | 0.8333100080615523 | 0.0571499988286135 | F | F | F |
| 0.3328500091896487 | 0.1653199940614059 | 0.0589599981996258 | F | F | F |
| 0.3319799900125986 | 0.8348799943726348 | 0.0628399997826108 | F | F | F |
| 0.6658499836809995 | 0.1663399934903538 | 0.0614599995434091 | F | F | F |
| 0.6657000184196491 | 0.4994199871907909 | 0.0623999982923920 | F | F | F |
| 0.6680499911019240 | 0.8350800275685089 | 0.0631899982792987 | F | F | F |
| 0.1665399968694743 | 0.9999399781380731 | 0.0571300014870246 | F | F | F |
| 0.1647700071264779 | 0.3318099975501880 | 0.0630899965588227 | F | F | F |
| 0.1649599969669993 | 0.6678699851318157 | 0.0628300011305356 | F | F | F |
| 0.4995799959066858 | 0.9996899962566772 | 0.0621200017787373 | F | F | F |
| 0.5004400015054742 | 0.3341600000654878 | 0.0623699985549493 | F | F | F |
| 0.8335300087518434 | 0.0006599999888621 | 0.0593699999149706 | F | F | F |
| 0.8335000276869380 | 0.3339900076717370 | 0.0614399984580416 | F | F | F |
| 0.8345299959310495 | 0.6670100092759697 | 0.0590099990224289 | F | F | F |
| 0.1655199974769772 | 0.1649699956211279 | 0.0588000007106046 | F | F | F |
| 0.1689099967855014 | 0.5010300278786701 | 0.0695900022914344 | F | F | F |
| 0.1661600023717327 | 0.8336899876319350 | 0.0583200007559981 | F | F | F |
| 0.5000299811505329 | 0.1666100025210966 | 0.0600900016626156 | F | F | F |
| 0.4982599914069894 | 0.5016000270702463 | 0.0694800019188762 | F | F | F |
| 0.4988099932978187 | 0.8309299945801385 | 0.0696299970120435 | F | F | F |
| 0.8332399726153312 | 0.1666100025210966 | 0.0610099993636766 | F | F | F |
| 0.8332399726178181 | 0.4998199939886163 | 0.0600900016626156 | F | F | F |
| 0.8348900079967692 | 0.8343399763111563 | 0.0588699989124351 | F | F | F |
| 0.0547900013529556 | 0.1105799972670667 | 0.0582499988478276 | F | F | F |
| 0.0574500001527696 | 0.4450300037547379 | 0.0647099986659398 | F | F | F |
| 0.0552599988734528 | 0.7778099775364282 | 0.0577500015516321 | F | F | F |
| 0.3890799879994375 | 0.1110199987696632 | 0.0590200014557141 | F | F | F |
| 0.3847500086142546 | 0.4413599968097515 | 0.0698899999278808 | F | F | F |
| 0.3856300115637481 | 0.7774099707386029 | 0.0697999968969185 | F | F | F |

|                    |                    |                    |   |   |   |
|--------------------|--------------------|--------------------|---|---|---|
| 0.7216899990961423 | 0.1110199987696632 | 0.0616299994282770 | F | F | F |
| 0.7213600277433585 | 0.4436900019336107 | 0.0609799995887954 | F | F | F |
| 0.7239000201781849 | 0.7793800235195363 | 0.0617300011113215 | F | F | F |
| 0.0548500008969128 | 0.2779600024177142 | 0.0611100010467140 | F | F | F |
| 0.0548699982635696 | 0.6113299727824142 | 0.0609100013869721 | F | F | F |
| 0.0557399988174794 | 0.9441199898966843 | 0.0569700002542319 | F | F | F |
| 0.3894000053534441 | 0.2770200073944125 | 0.0612200014192723 | F | F | F |
| 0.3885200023536157 | 0.9449700116936768 | 0.0609200000764787 | F | F | F |
| 0.7219600081768291 | 0.2778800130081720 | 0.0612899996210956 | F | F | F |
| 0.7228400111134903 | 0.6104599833518947 | 0.0612800009690204 | F | F | F |
| 0.7218999862732431 | 0.9449999928237744 | 0.0611900016818296 | F | F | F |
| 0.2224700004002287 | 0.1112700029890163 | 0.0579399988155274 | F | F | F |
| 0.2239000052058842 | 0.4420799910817479 | 0.0698800012383671 | F | F | F |
| 0.2217099964610867 | 0.7781400084212819 | 0.0611599981631770 | F | F | F |
| 0.5554500222519394 | 0.1106600016727199 | 0.0609599985034350 | F | F | F |
| 0.5538799763018645 | 0.4459800124308089 | 0.0648500025197052 | F | F | F |
| 0.5577600002220393 | 0.7759199738370555 | 0.0699200034090950 | F | F | F |
| 0.8886299729346163 | 0.1112200022076308 | 0.0597000010326383 | F | F | F |
| 0.8891900181671417 | 0.4444000124669500 | 0.0609400011618462 | F | F | F |
| 0.8885800242332564 | 0.7773900031831715 | 0.0579899996383304 | F | F | F |
| 0.2204699963058161 | 0.2759700119173587 | 0.0616400018241308 | F | F | F |
| 0.2224200070404621 | 0.6142200231952089 | 0.0697799995553297 | F | F | F |
| 0.2220399975825629 | 0.9445899725293785 | 0.0577399991557783 | F | F | F |
| 0.5561599731237834 | 0.2784900069045193 | 0.0609700009367202 | F | F | F |
| 0.5584899783382440 | 0.6151199936777303 | 0.0699099972694697 | F | F | F |
| 0.5548200011515050 | 0.9423800111137410 | 0.0647599995261743 | F | F | F |
| 0.8888199925564066 | 0.2781499922028985 | 0.0615999996534029 | F | F | F |
| 0.8888300061197185 | 0.6107800006620749 | 0.0590399987973029 | F | F | F |
| 0.8892800212255736 | 0.9450600147559953 | 0.0582900010185554 | F | F | F |
| 0.2462780865779847 | 0.7423413606072835 | 0.2481434568304300 | T | T | T |
| 0.1754692297092953 | 0.6299769708222100 | 0.2228884911719542 | T | T | T |
| 0.2053103749249202 | 0.7755906121668406 | 0.2769135519973289 | T | T | T |
| 0.3417845143576998 | 0.7830653405473434 | 0.2330586206833405 | T | T | T |
| 0.2604245928409378 | 0.4299007441001556 | 0.2454170873525329 | T | T | T |
| 0.1053600400863437 | 0.6143067943158190 | 0.1941131176869226 | T | T | T |
| 0.2804075159314572 | 0.4224771167421625 | 0.2792600622342633 | T | T | T |

Structure02

\*O+\*COHCOO\*

1.0000000000000000

14.7840003966999998 0.0000000000000000 0.0000000000000000

-7.3920001983999999 12.8033199130999993 0.0000000000000000

0.0000000000000000 0.0000000000000000 26.7110004425000014

Cu N C O H

## Selective dynamics

## Direct

|                    |                    |                    |   |   |   |
|--------------------|--------------------|--------------------|---|---|---|
| 0.3883999883824316 | 0.6109899878387068 | 0.1237199976883616 | F | F | F |
| 0.4292643375304163 | 0.5614405418000726 | 0.2012633584870474 | T | T | T |
| 0.2465836420423261 | 0.5451195135895908 | 0.2068910158474755 | T | T | T |
| 0.4142640749574460 | 0.7156575538309156 | 0.1968908974222325 | T | T | T |
| 0.3273999989159151 | 0.6724299788206594 | 0.0770300030666817 | F | F | F |
| 0.3273600042078257 | 0.4895400106801233 | 0.0762199982880674 | F | F | F |
| 0.5102499723826810 | 0.6724500060481091 | 0.0761599987757577 | F | F | F |
| 0.9996700287274507 | 0.0001800000324650 | 0.0573600009216477 | F | F | F |
| 0.0003299999634265 | 0.3344300090962307 | 0.0625099986649431 | F | F | F |
| 0.9996899962509573 | 0.6666100025562471 | 0.0586999989901287 | F | F | F |
| 0.3332400024166660 | 0.0001599999854633 | 0.0586900003380535 | F | F | F |
| 0.6654199958038518 | 0.9995099902101501 | 0.0625599995251847 | F | F | F |
| 0.6666899919723832 | 0.3331600129459886 | 0.0612300001087860 | F | F | F |
| 0.3321700096157301 | 0.3312500119332853 | 0.0634699985367249 | F | F | F |
| 0.6686199903697627 | 0.6676899790852886 | 0.0635500028781806 | F | F | F |
| 0.9991999865008054 | 0.1663299948336885 | 0.0593199990547291 | F | F | F |
| 0.0001500000141448 | 0.5002700090658863 | 0.0620899982600847 | F | F | F |
| 0.9999099969734431 | 0.8333100080615523 | 0.0571499988286135 | F | F | F |
| 0.3328500091896487 | 0.1653199940614059 | 0.0589599981996258 | F | F | F |
| 0.3319799900125986 | 0.8348799943726348 | 0.0628399997826108 | F | F | F |
| 0.6658499836809995 | 0.1663399934903538 | 0.0614599995434091 | F | F | F |
| 0.6657000184196491 | 0.4994199871907909 | 0.0623999982923920 | F | F | F |
| 0.6680499911019240 | 0.8350800275685089 | 0.0631899982792987 | F | F | F |
| 0.1665399968694743 | 0.9999399781380731 | 0.0571300014870246 | F | F | F |
| 0.1647700071264779 | 0.3318099975501880 | 0.0630899965588227 | F | F | F |
| 0.1649599969669993 | 0.6678699851318157 | 0.0628300011305356 | F | F | F |
| 0.4995799959066858 | 0.9996899962566772 | 0.0621200017787373 | F | F | F |
| 0.5004400015054742 | 0.3341600000654878 | 0.0623699985549493 | F | F | F |
| 0.8335300087518434 | 0.0006599999888621 | 0.0593699999149706 | F | F | F |
| 0.8335000276869380 | 0.3339900076717370 | 0.0614399984580416 | F | F | F |
| 0.8345299959310495 | 0.6670100092759697 | 0.0590099990224289 | F | F | F |
| 0.1655199974769772 | 0.1649699956211279 | 0.0588000007106046 | F | F | F |
| 0.1689099967855014 | 0.5010300278786701 | 0.0695900022914344 | F | F | F |
| 0.1661600023717327 | 0.8336899876319350 | 0.0583200007559981 | F | F | F |
| 0.5000299811505329 | 0.1666100025210966 | 0.0600900016626156 | F | F | F |
| 0.4982599914069894 | 0.5016000270702463 | 0.0694800019188762 | F | F | F |
| 0.4988099932978187 | 0.8309299945801385 | 0.0696299970120435 | F | F | F |
| 0.8332399726153312 | 0.1666100025210966 | 0.0610099993636766 | F | F | F |
| 0.8332399726178181 | 0.4998199939886163 | 0.0600900016626156 | F | F | F |
| 0.8348900079967692 | 0.8343399763111563 | 0.0588699989124351 | F | F | F |
| 0.0547900013529556 | 0.1105799972670667 | 0.0582499988478276 | F | F | F |

|                    |                    |                    |   |   |   |
|--------------------|--------------------|--------------------|---|---|---|
| 0.0574500001527696 | 0.4450300037547379 | 0.0647099986659398 | F | F | F |
| 0.0552599988734528 | 0.7778099775364282 | 0.0577500015516321 | F | F | F |
| 0.3890799879994375 | 0.1110199987696632 | 0.0590200014557141 | F | F | F |
| 0.3847500086142546 | 0.4413599968097515 | 0.0698899999278808 | F | F | F |
| 0.3856300115637481 | 0.7774099707386029 | 0.0697999968969185 | F | F | F |
| 0.7216899990961423 | 0.1110199987696632 | 0.0616299994282770 | F | F | F |
| 0.7213600277433585 | 0.4436900019336107 | 0.0609799995887954 | F | F | F |
| 0.7239000201781849 | 0.7793800235195363 | 0.0617300011113215 | F | F | F |
| 0.0548500008969128 | 0.2779600024177142 | 0.0611100010467140 | F | F | F |
| 0.0548699982635696 | 0.6113299727824142 | 0.0609100013869721 | F | F | F |
| 0.0557399988174794 | 0.9441199898966843 | 0.0569700002542319 | F | F | F |
| 0.3894000053534441 | 0.2770200073944125 | 0.0612200014192723 | F | F | F |
| 0.3885200023536157 | 0.9449700116936768 | 0.0609200000764787 | F | F | F |
| 0.7219600081768291 | 0.2778800130081720 | 0.0612899996210956 | F | F | F |
| 0.7228400111134903 | 0.6104599833518947 | 0.0612800009690204 | F | F | F |
| 0.7218999862732431 | 0.9449999928237744 | 0.0611900016818296 | F | F | F |
| 0.2224700004002287 | 0.1112700029890163 | 0.0579399988155274 | F | F | F |
| 0.2239000052058842 | 0.4420799910817479 | 0.0698800012383671 | F | F | F |
| 0.2217099964610867 | 0.7781400084212819 | 0.0611599981631770 | F | F | F |
| 0.5554500222519394 | 0.1106600016727199 | 0.0609599985034350 | F | F | F |
| 0.5538799763018645 | 0.4459800124308089 | 0.0648500025197052 | F | F | F |
| 0.5577600002220393 | 0.7759199738370555 | 0.0699200034090950 | F | F | F |
| 0.8886299729346163 | 0.1112200022076308 | 0.0597000010326383 | F | F | F |
| 0.8891900181671417 | 0.4444000124669500 | 0.0609400011618462 | F | F | F |
| 0.8885800242332564 | 0.7773900031831715 | 0.0579899996383304 | F | F | F |
| 0.2204699963058161 | 0.2759700119173587 | 0.0616400018241308 | F | F | F |
| 0.2224200070404621 | 0.6142200231952089 | 0.0697799995553297 | F | F | F |
| 0.2220399975825629 | 0.9445899725293785 | 0.0577399991557783 | F | F | F |
| 0.5561599731237834 | 0.2784900069045193 | 0.0609700009367202 | F | F | F |
| 0.5584899783382440 | 0.6151199936777303 | 0.0699099972694697 | F | F | F |
| 0.5548200011515050 | 0.9423800111137410 | 0.0647599995261743 | F | F | F |
| 0.8888199925564066 | 0.2781499922028985 | 0.0615999996534029 | F | F | F |
| 0.8888300061197185 | 0.6107800006620749 | 0.0590399987973029 | F | F | F |
| 0.8892800212255736 | 0.9450600147559953 | 0.0582900010185554 | F | F | F |
| 0.2555785862986244 | 0.7526446229234259 | 0.2196294146145316 | T | T | T |
| 0.1904025070377952 | 0.6313111725727818 | 0.2119749395937614 | T | T | T |
| 0.1987308116729467 | 0.7932347413817423 | 0.2245724714953405 | T | T | T |
| 0.3552650713670634 | 0.7993960379171750 | 0.2196250255697241 | T | T | T |
| 0.2980048068482301 | 0.4590197047090880 | 0.2115912537271659 | T | T | T |
| 0.0929005506723124 | 0.6071592939649597 | 0.2113521272374785 | T | T | T |
| 0.1020139451745427 | 0.6827537977124361 | 0.2175667574226754 | T | T | T |

Structure03

\*O+\*COCOHO\*

1.0000000000000000

|                     |                     |                     |
|---------------------|---------------------|---------------------|
| 14.7840003966999998 | 0.0000000000000000  | 0.0000000000000000  |
| -7.3920001983999999 | 12.8033199130999993 | 0.0000000000000000  |
| 0.0000000000000000  | 0.0000000000000000  | 26.7110004425000014 |

|    |   |    |   |   |
|----|---|----|---|---|
| Cu | N | C  | O | H |
| 4  | 9 | 64 | 4 | 1 |

Selective dynamics

Direct

|                    |                    |                    |   |   |   |
|--------------------|--------------------|--------------------|---|---|---|
| 0.3883999883824316 | 0.6109899878387068 | 0.1237199976883616 | F | F | F |
| 0.4255267361371969 | 0.5415605846833658 | 0.1967699970402015 | T | T | T |
| 0.2532799917805850 | 0.5386279555802610 | 0.2031073453959872 | T | T | T |
| 0.4214084647470115 | 0.7029413204526451 | 0.2011404993047044 | T | T | T |
| 0.3273999989159151 | 0.6724299788206594 | 0.0770300030666817 | F | F | F |
| 0.3273600042078257 | 0.4895400106801233 | 0.0762199982880674 | F | F | F |
| 0.5102499723826810 | 0.6724500060481091 | 0.0761599987757577 | F | F | F |
| 0.9996700287274507 | 0.0001800000324650 | 0.0573600009216477 | F | F | F |
| 0.0003299999634265 | 0.3344300090962307 | 0.0625099986649431 | F | F | F |
| 0.9996899962509573 | 0.6666100025562471 | 0.0586999989901287 | F | F | F |
| 0.3332400024166660 | 0.000159999854633  | 0.0586900003380535 | F | F | F |
| 0.6654199958038518 | 0.9995099902101501 | 0.0625599995251847 | F | F | F |
| 0.6666899919723832 | 0.3331600129459886 | 0.0612300001087860 | F | F | F |
| 0.3321700096157301 | 0.3312500119332853 | 0.0634699985367249 | F | F | F |
| 0.6686199903697627 | 0.6676899790852886 | 0.0635500028781806 | F | F | F |
| 0.9991999865008054 | 0.1663299948336885 | 0.0593199990547291 | F | F | F |
| 0.0001500000141448 | 0.5002700090658863 | 0.0620899982600847 | F | F | F |
| 0.9999099969734431 | 0.8333100080615523 | 0.0571499988286135 | F | F | F |
| 0.3328500091896487 | 0.1653199940614059 | 0.0589599981996258 | F | F | F |
| 0.3319799900125986 | 0.8348799943726348 | 0.0628399997826108 | F | F | F |
| 0.6658499836809995 | 0.1663399934903538 | 0.0614599995434091 | F | F | F |
| 0.6657000184196491 | 0.4994199871907909 | 0.0623999982923920 | F | F | F |
| 0.6680499911019240 | 0.8350800275685089 | 0.0631899982792987 | F | F | F |
| 0.1665399968694743 | 0.9999399781380731 | 0.0571300014870246 | F | F | F |
| 0.1647700071264779 | 0.3318099975501880 | 0.0630899965588227 | F | F | F |
| 0.1649599969669993 | 0.6678699851318157 | 0.0628300011305356 | F | F | F |
| 0.4995799959066858 | 0.9996899962566772 | 0.0621200017787373 | F | F | F |
| 0.5004400015054742 | 0.3341600000654878 | 0.0623699985549493 | F | F | F |
| 0.8335300087518434 | 0.0006599999888621 | 0.0593699999149706 | F | F | F |
| 0.8335000276869380 | 0.3339900076717370 | 0.0614399984580416 | F | F | F |
| 0.8345299959310495 | 0.6670100092759697 | 0.0590099990224289 | F | F | F |
| 0.1655199974769772 | 0.1649699956211279 | 0.0588000007106046 | F | F | F |
| 0.1689099967855014 | 0.5010300278786701 | 0.0695900022914344 | F | F | F |
| 0.1661600023717327 | 0.8336899876319350 | 0.0583200007559981 | F | F | F |
| 0.5000299811505329 | 0.1666100025210966 | 0.0600900016626156 | F | F | F |
| 0.4982599914069894 | 0.5016000270702463 | 0.0694800019188762 | F | F | F |



|                    |                    |                    |   |   |   |
|--------------------|--------------------|--------------------|---|---|---|
| 0.4988099932978187 | 0.8309299945801385 | 0.0696299970120435 | F | F | F |
| 0.8332399726153312 | 0.1666100025210966 | 0.0610099993636766 | F | F | F |
| 0.8332399726178181 | 0.4998199939886163 | 0.0600900016626156 | F | F | F |
| 0.8348900079967692 | 0.8343399763111563 | 0.0588699989124351 | F | F | F |
| 0.0547900013529556 | 0.1105799972670667 | 0.0582499988478276 | F | F | F |
| 0.0574500001527696 | 0.4450300037547379 | 0.0647099986659398 | F | F | F |
| 0.0552599988734528 | 0.7778099775364282 | 0.0577500015516321 | F | F | F |
| 0.3890799879994375 | 0.1110199987696632 | 0.0590200014557141 | F | F | F |
| 0.3847500086142546 | 0.4413599968097515 | 0.069889999278808  | F | F | F |
| 0.3856300115637481 | 0.7774099707386029 | 0.0697999968969185 | F | F | F |
| 0.7216899990961423 | 0.1110199987696632 | 0.0616299994282770 | F | F | F |
| 0.7213600277433585 | 0.4436900019336107 | 0.0609799995887954 | F | F | F |
| 0.7239000201781849 | 0.7793800235195363 | 0.0617300011113215 | F | F | F |
| 0.0548500008969128 | 0.2779600024177142 | 0.0611100010467140 | F | F | F |
| 0.0548699982635696 | 0.6113299727824142 | 0.0609100013869721 | F | F | F |
| 0.0557399988174794 | 0.9441199898966843 | 0.0569700002542319 | F | F | F |
| 0.3894000053534441 | 0.2770200073944125 | 0.0612200014192723 | F | F | F |
| 0.3885200023536157 | 0.9449700116936768 | 0.0609200000764787 | F | F | F |
| 0.7219600081768291 | 0.2778800130081720 | 0.0612899996210956 | F | F | F |
| 0.7228400111134903 | 0.6104599833518947 | 0.0612800009690204 | F | F | F |
| 0.7218999862732431 | 0.9449999928237744 | 0.0611900016818296 | F | F | F |
| 0.2224700004002287 | 0.1112700029890163 | 0.0579399988155274 | F | F | F |
| 0.2239000052058842 | 0.4420799910817479 | 0.0698800012383671 | F | F | F |
| 0.2217099964610867 | 0.7781400084212819 | 0.0611599981631770 | F | F | F |
| 0.5554500222519394 | 0.1106600016727199 | 0.0609599985034350 | F | F | F |
| 0.5538799763018645 | 0.4459800124308089 | 0.0648500025197052 | F | F | F |
| 0.5577600002220393 | 0.7759199738370555 | 0.0699200034090950 | F | F | F |
| 0.8886299729346163 | 0.1112200022076308 | 0.0597000010326383 | F | F | F |
| 0.8891900181671417 | 0.4444000124669500 | 0.0609400011618462 | F | F | F |
| 0.8885800242332564 | 0.7773900031831715 | 0.0579899996383304 | F | F | F |
| 0.2204699963058161 | 0.2759700119173587 | 0.0616400018241308 | F | F | F |
| 0.2224200070404621 | 0.6142200231952089 | 0.0697799995553297 | F | F | F |
| 0.2220399975825629 | 0.9445899725293785 | 0.0577399991557783 | F | F | F |
| 0.5561599731237834 | 0.2784900069045193 | 0.0609700009367202 | F | F | F |
| 0.5584899783382440 | 0.6151199936777303 | 0.0699099972694697 | F | F | F |
| 0.5548200011515050 | 0.9423800111137410 | 0.0647599995261743 | F | F | F |
| 0.8888199925564066 | 0.2781499922028985 | 0.0615999996534029 | F | F | F |
| 0.8888300061197185 | 0.6107800006620749 | 0.0590399987973029 | F | F | F |
| 0.8892800212255736 | 0.9450600147559953 | 0.0582900010185554 | F | F | F |
| 0.2664438831933977 | 0.7251764035901523 | 0.2441085671795784 | T | T | T |
| 0.2023283716520420 | 0.6330663717095328 | 0.2074249930842372 | T | T | T |
| 0.2110389807302811 | 0.7474444676981015 | 0.2761141471328670 | T | T | T |
| 0.3640274973099358 | 0.7729180907457915 | 0.2455350620510486 | T | T | T |
| 0.2929509802928963 | 0.4417161738148161 | 0.2069263139812764 | T | T | T |

|                    |                    |                    |   |   |   |
|--------------------|--------------------|--------------------|---|---|---|
| 0.1305318655746122 | 0.6347803938156686 | 0.1846109890087974 | T | T | T |
| 0.2596412823714759 | 0.8026849501845299 | 0.2989127851594443 | T | T | T |

Structure04

\*O+\*COCOO\*H

1.0000000000000000

|                     |                     |                     |   |   |
|---------------------|---------------------|---------------------|---|---|
| 14.7840003966999998 | 0.0000000000000000  | 0.0000000000000000  |   |   |
| -7.3920001983999999 | 12.8033199130999993 | 0.0000000000000000  |   |   |
| 0.0000000000000000  | 0.0000000000000000  | 26.7110004425000014 |   |   |
| Cu                  | N                   | C                   | O | H |
| 4                   | 9                   | 64                  | 4 | 1 |

Selective dynamics

Direct

|                    |                    |                    |   |   |   |
|--------------------|--------------------|--------------------|---|---|---|
| 0.3883999883824316 | 0.6109899878387068 | 0.1237199976883616 | F | F | F |
| 0.4150602001668953 | 0.5355584838289628 | 0.1975483387405438 | T | T | T |
| 0.2494243634890037 | 0.5452552157959992 | 0.2045747502793446 | T | T | T |
| 0.4214789876631598 | 0.7018617769138300 | 0.2008971018376761 | T | T | T |
| 0.3273999989159151 | 0.6724299788206594 | 0.0770300030666817 | F | F | F |
| 0.3273600042078257 | 0.4895400106801233 | 0.0762199982880674 | F | F | F |
| 0.5102499723826810 | 0.6724500060481091 | 0.0761599987757577 | F | F | F |
| 0.9996700287274507 | 0.0001800000324650 | 0.0573600009216477 | F | F | F |
| 0.0003299999634265 | 0.3344300090962307 | 0.0625099986649431 | F | F | F |
| 0.9996899962509573 | 0.6666100025562471 | 0.0586999989901287 | F | F | F |
| 0.3332400024166660 | 0.0001599999854633 | 0.0586900003380535 | F | F | F |
| 0.6654199958038518 | 0.9995099902101501 | 0.0625599995251847 | F | F | F |
| 0.6666899919723832 | 0.3331600129459886 | 0.0612300001087860 | F | F | F |
| 0.3321700096157301 | 0.3312500119332853 | 0.0634699985367249 | F | F | F |
| 0.6686199903697627 | 0.6676899790852886 | 0.0635500028781806 | F | F | F |
| 0.9991999865008054 | 0.1663299948336885 | 0.0593199990547291 | F | F | F |
| 0.0001500000141448 | 0.5002700090658863 | 0.0620899982600847 | F | F | F |
| 0.9999099969734431 | 0.8333100080615523 | 0.0571499988286135 | F | F | F |
| 0.3328500091896487 | 0.1653199940614059 | 0.0589599981996258 | F | F | F |
| 0.3319799900125986 | 0.8348799943726348 | 0.0628399997826108 | F | F | F |
| 0.6658499836809995 | 0.1663399934903538 | 0.0614599995434091 | F | F | F |
| 0.6657000184196491 | 0.4994199871907909 | 0.0623999982923920 | F | F | F |
| 0.6680499911019240 | 0.8350800275685089 | 0.0631899982792987 | F | F | F |
| 0.1665399968694743 | 0.9999399781380731 | 0.0571300014870246 | F | F | F |
| 0.1647700071264779 | 0.3318099975501880 | 0.0630899965588227 | F | F | F |
| 0.1649599969669993 | 0.6678699851318157 | 0.0628300011305356 | F | F | F |
| 0.4995799959066858 | 0.9996899962566772 | 0.0621200017787373 | F | F | F |
| 0.5004400015054742 | 0.3341600000654878 | 0.0623699985549493 | F | F | F |
| 0.8335300087518434 | 0.0006599999888621 | 0.0593699999149706 | F | F | F |
| 0.8335000276869380 | 0.3339900076717370 | 0.0614399984580416 | F | F | F |
| 0.8345299959310495 | 0.6670100092759697 | 0.0590099990224289 | F | F | F |

|                    |                    |                    |   |   |   |
|--------------------|--------------------|--------------------|---|---|---|
| 0.1655199974769772 | 0.1649699956211279 | 0.0588000007106046 | F | F | F |
| 0.1689099967855014 | 0.5010300278786701 | 0.0695900022914344 | F | F | F |
| 0.1661600023717327 | 0.8336899876319350 | 0.0583200007559981 | F | F | F |
| 0.5000299811505329 | 0.1666100025210966 | 0.0600900016626156 | F | F | F |
| 0.4982599914069894 | 0.5016000270702463 | 0.0694800019188762 | F | F | F |
| 0.4988099932978187 | 0.8309299945801385 | 0.0696299970120435 | F | F | F |
| 0.8332399726153312 | 0.1666100025210966 | 0.0610099993636766 | F | F | F |
| 0.8332399726178181 | 0.4998199939886163 | 0.0600900016626156 | F | F | F |
| 0.8348900079967692 | 0.8343399763111563 | 0.0588699989124351 | F | F | F |
| 0.0547900013529556 | 0.1105799972670667 | 0.0582499988478276 | F | F | F |
| 0.0574500001527696 | 0.4450300037547379 | 0.0647099986659398 | F | F | F |
| 0.0552599988734528 | 0.7778099775364282 | 0.0577500015516321 | F | F | F |
| 0.3890799879994375 | 0.1110199987696632 | 0.0590200014557141 | F | F | F |
| 0.3847500086142546 | 0.4413599968097515 | 0.0698899999278808 | F | F | F |
| 0.3856300115637481 | 0.7774099707386029 | 0.0697999968969185 | F | F | F |
| 0.7216899990961423 | 0.1110199987696632 | 0.0616299994282770 | F | F | F |
| 0.7213600277433585 | 0.4436900019336107 | 0.0609799995887954 | F | F | F |
| 0.7239000201781849 | 0.7793800235195363 | 0.0617300011113215 | F | F | F |
| 0.0548500008969128 | 0.2779600024177142 | 0.0611100010467140 | F | F | F |
| 0.0548699982635696 | 0.6113299727824142 | 0.0609100013869721 | F | F | F |
| 0.0557399988174794 | 0.9441199898966843 | 0.0569700002542319 | F | F | F |
| 0.3894000053534441 | 0.2770200073944125 | 0.0612200014192723 | F | F | F |
| 0.3885200023536157 | 0.9449700116936768 | 0.0609200000764787 | F | F | F |
| 0.7219600081768291 | 0.2778800130081720 | 0.0612899996210956 | F | F | F |
| 0.7228400111134903 | 0.6104599833518947 | 0.0612800009690204 | F | F | F |
| 0.7218999862732431 | 0.9449999928237744 | 0.0611900016818296 | F | F | F |
| 0.2224700004002287 | 0.1112700029890163 | 0.0579399988155274 | F | F | F |
| 0.2239000052058842 | 0.4420799910817479 | 0.0698800012383671 | F | F | F |
| 0.2217099964610867 | 0.7781400084212819 | 0.0611599981631770 | F | F | F |
| 0.5554500222519394 | 0.1106600016727199 | 0.0609599985034350 | F | F | F |
| 0.5538799763018645 | 0.4459800124308089 | 0.0648500025197052 | F | F | F |
| 0.5577600002220393 | 0.7759199738370555 | 0.0699200034090950 | F | F | F |
| 0.8886299729346163 | 0.1112200022076308 | 0.0597000010326383 | F | F | F |
| 0.8891900181671417 | 0.4444000124669500 | 0.0609400011618462 | F | F | F |
| 0.8885800242332564 | 0.7773900031831715 | 0.0579899996383304 | F | F | F |
| 0.2204699963058161 | 0.2759700119173587 | 0.0616400018241308 | F | F | F |
| 0.2224200070404621 | 0.6142200231952089 | 0.0697799995553297 | F | F | F |
| 0.2220399975825629 | 0.9445899725293785 | 0.0577399991557783 | F | F | F |
| 0.5561599731237834 | 0.2784900069045193 | 0.0609700009367202 | F | F | F |
| 0.5584899783382440 | 0.6151199936777303 | 0.0699099972694697 | F | F | F |
| 0.5548200011515050 | 0.9423800111137410 | 0.0647599995261743 | F | F | F |
| 0.8888199925564066 | 0.2781499922028985 | 0.0615999996534029 | F | F | F |
| 0.8888300061197185 | 0.6107800006620749 | 0.0590399987973029 | F | F | F |
| 0.8892800212255736 | 0.9450600147559953 | 0.0582900010185554 | F | F | F |

|                    |                    |                    |   |   |   |
|--------------------|--------------------|--------------------|---|---|---|
| 0.2570455295574100 | 0.7315352087970968 | 0.2474075273010531 | T | T | T |
| 0.2030901010923983 | 0.6435401323186570 | 0.2074223926504169 | T | T | T |
| 0.2177210404703336 | 0.7539894922208076 | 0.2812194936968699 | T | T | T |
| 0.3675160060192329 | 0.7826379395863604 | 0.2427793955435083 | T | T | T |
| 0.2808801450357156 | 0.4424208208861491 | 0.2089378214285442 | T | T | T |
| 0.1333126210473032 | 0.6453452085852105 | 0.1827880298757486 | T | T | T |
| 0.3981343348050791 | 0.8312854882649211 | 0.2709781170499010 | T | T | T |

Structure05

H<sub>2</sub>O+\*CO<sub>2</sub>O\*

1.0000000000000000

|                     |                     |                     |
|---------------------|---------------------|---------------------|
| 14.7840003966999998 | 0.0000000000000000  | 0.0000000000000000  |
| -7.3920001983999999 | 12.8033199130999993 | 0.0000000000000000  |
| 0.0000000000000000  | 0.0000000000000000  | 26.7110004425000014 |

|    |   |    |   |   |
|----|---|----|---|---|
| Cu | N | C  | O | H |
| 4  | 9 | 64 | 4 | 2 |

Selective dynamics

Direct

|                    |                    |                    |   |   |   |
|--------------------|--------------------|--------------------|---|---|---|
| 0.3883999883824316 | 0.6109899878387068 | 0.1237199976883616 | F | F | F |
| 0.4029891197574968 | 0.5515904807421702 | 0.2037213529820064 | T | T | T |
| 0.2551231649439090 | 0.5836550828197735 | 0.1888494869619322 | T | T | T |
| 0.4278820185028208 | 0.7232511342480794 | 0.1956772066382537 | T | T | T |
| 0.3273999989159151 | 0.6724299788206594 | 0.0770300030666817 | F | F | F |
| 0.3273600042078257 | 0.4895400106801233 | 0.0762199982880674 | F | F | F |
| 0.5102499723826810 | 0.6724500060481091 | 0.0761599987757577 | F | F | F |
| 0.9996700287274507 | 0.0001800000324650 | 0.0573600009216477 | F | F | F |
| 0.0003299999634265 | 0.3344300090962307 | 0.0625099986649431 | F | F | F |
| 0.9996899962509573 | 0.6666100025562471 | 0.0586999989901287 | F | F | F |
| 0.3332400024166660 | 0.0001599999854633 | 0.0586900003380535 | F | F | F |
| 0.6654199958038518 | 0.9995099902101501 | 0.0625599995251847 | F | F | F |
| 0.6666899919723832 | 0.3331600129459886 | 0.0612300001087860 | F | F | F |
| 0.3321700096157301 | 0.3312500119332853 | 0.0634699985367249 | F | F | F |
| 0.6686199903697627 | 0.6676899790852886 | 0.0635500028781806 | F | F | F |
| 0.9991999865008054 | 0.1663299948336885 | 0.0593199990547291 | F | F | F |
| 0.0001500000141448 | 0.5002700090658863 | 0.0620899982600847 | F | F | F |
| 0.9999099969734431 | 0.8333100080615523 | 0.0571499988286135 | F | F | F |
| 0.3328500091896487 | 0.1653199940614059 | 0.0589599981996258 | F | F | F |
| 0.3319799900125986 | 0.8348799943726348 | 0.0628399997826108 | F | F | F |
| 0.6658499836809995 | 0.1663399934903538 | 0.0614599995434091 | F | F | F |
| 0.6657000184196491 | 0.4994199871907909 | 0.0623999982923920 | F | F | F |
| 0.6680499911019240 | 0.8350800275685089 | 0.0631899982792987 | F | F | F |
| 0.1665399968694743 | 0.9999399781380731 | 0.0571300014870246 | F | F | F |
| 0.1647700071264779 | 0.3318099975501880 | 0.0630899965588227 | F | F | F |
| 0.1649599969669993 | 0.6678699851318157 | 0.0628300011305356 | F | F | F |

|                    |                    |                    |   |   |   |
|--------------------|--------------------|--------------------|---|---|---|
| 0.4995799959066858 | 0.9996899962566772 | 0.0621200017787373 | F | F | F |
| 0.5004400015054742 | 0.3341600000654878 | 0.0623699985549493 | F | F | F |
| 0.8335300087518434 | 0.0006599999888621 | 0.0593699999149706 | F | F | F |
| 0.8335000276869380 | 0.3339900076717370 | 0.0614399984580416 | F | F | F |
| 0.8345299959310495 | 0.6670100092759697 | 0.0590099990224289 | F | F | F |
| 0.1655199974769772 | 0.1649699956211279 | 0.0588000007106046 | F | F | F |
| 0.1689099967855014 | 0.5010300278786701 | 0.0695900022914344 | F | F | F |
| 0.1661600023717327 | 0.8336899876319350 | 0.0583200007559981 | F | F | F |
| 0.5000299811505329 | 0.1666100025210966 | 0.0600900016626156 | F | F | F |
| 0.4982599914069894 | 0.5016000270702463 | 0.0694800019188762 | F | F | F |
| 0.4988099932978187 | 0.8309299945801385 | 0.0696299970120435 | F | F | F |
| 0.8332399726153312 | 0.1666100025210966 | 0.0610099993636766 | F | F | F |
| 0.8332399726178181 | 0.4998199939886163 | 0.0600900016626156 | F | F | F |
| 0.8348900079967692 | 0.8343399763111563 | 0.0588699989124351 | F | F | F |
| 0.0547900013529556 | 0.1105799972670667 | 0.0582499988478276 | F | F | F |
| 0.0574500001527696 | 0.4450300037547379 | 0.0647099986659398 | F | F | F |
| 0.0552599988734528 | 0.7778099775364282 | 0.0577500015516321 | F | F | F |
| 0.3890799879994375 | 0.1110199987696632 | 0.0590200014557141 | F | F | F |
| 0.3847500086142546 | 0.4413599968097515 | 0.0698899999278808 | F | F | F |
| 0.3856300115637481 | 0.7774099707386029 | 0.0697999968969185 | F | F | F |
| 0.7216899990961423 | 0.1110199987696632 | 0.0616299994282770 | F | F | F |
| 0.7213600277433585 | 0.4436900019336107 | 0.0609799995887954 | F | F | F |
| 0.7239000201781849 | 0.7793800235195363 | 0.0617300011113215 | F | F | F |
| 0.0548500008969128 | 0.2779600024177142 | 0.0611100010467140 | F | F | F |
| 0.0548699982635696 | 0.6113299727824142 | 0.0609100013869721 | F | F | F |
| 0.0557399988174794 | 0.9441199898966843 | 0.0569700002542319 | F | F | F |
| 0.3894000053534441 | 0.2770200073944125 | 0.0612200014192723 | F | F | F |
| 0.3885200023536157 | 0.9449700116936768 | 0.0609200000764787 | F | F | F |
| 0.7219600081768291 | 0.2778800130081720 | 0.0612899996210956 | F | F | F |
| 0.7228400111134903 | 0.6104599833518947 | 0.0612800009690204 | F | F | F |
| 0.7218999862732431 | 0.9449999928237744 | 0.0611900016818296 | F | F | F |
| 0.2224700004002287 | 0.1112700029890163 | 0.0579399988155274 | F | F | F |
| 0.2239000052058842 | 0.4420799910817479 | 0.0698800012383671 | F | F | F |
| 0.2217099964610867 | 0.7781400084212819 | 0.0611599981631770 | F | F | F |
| 0.5554500222519394 | 0.1106600016727199 | 0.0609599985034350 | F | F | F |
| 0.5538799763018645 | 0.4459800124308089 | 0.0648500025197052 | F | F | F |
| 0.5577600002220393 | 0.7759199738370555 | 0.0699200034090950 | F | F | F |
| 0.8886299729346163 | 0.1112200022076308 | 0.0597000010326383 | F | F | F |
| 0.8891900181671417 | 0.4444000124669500 | 0.0609400011618462 | F | F | F |
| 0.8885800242332564 | 0.7773900031831715 | 0.0579899996383304 | F | F | F |
| 0.2204699963058161 | 0.2759700119173587 | 0.0616400018241308 | F | F | F |
| 0.2224200070404621 | 0.6142200231952089 | 0.0697799995553297 | F | F | F |
| 0.2220399975825629 | 0.9445899725293785 | 0.0577399991557783 | F | F | F |
| 0.5561599731237834 | 0.2784900069045193 | 0.0609700009367202 | F | F | F |

|                    |                    |                    |   |   |   |
|--------------------|--------------------|--------------------|---|---|---|
| 0.5584899783382440 | 0.6151199936777303 | 0.0699099972694697 | F | F | F |
| 0.5548200011515050 | 0.9423800111137410 | 0.0647599995261743 | F | F | F |
| 0.8888199925564066 | 0.2781499922028985 | 0.0615999996534029 | F | F | F |
| 0.8888300061197185 | 0.6107800006620749 | 0.0590399987973029 | F | F | F |
| 0.8892800212255736 | 0.9450600147559953 | 0.0582900010185554 | F | F | F |
| 0.2891806880887716 | 0.7680229736162495 | 0.2446055557731249 | T | T | T |
| 0.2112145448801344 | 0.6831918846769983 | 0.2054103447888077 | T | T | T |
| 0.2518628728910036 | 0.7879568005812000 | 0.2810492878634420 | T | T | T |
| 0.3872223431990577 | 0.8072994271507136 | 0.2325448151204587 | T | T | T |
| 0.4098000172348972 | 0.4600732338561034 | 0.2595487974129741 | T | T | T |
| 0.1488986840046229 | 0.6978047189711518 | 0.1821028903616505 | T | T | T |
| 0.3738978953573376 | 0.4620084622695895 | 0.2897960452478970 | T | T | T |
| 0.3826914873861658 | 0.3864898088105544 | 0.2519147454035002 | T | T | T |

Structure06

\*OH+\*COHCOO\*

1.0000000000000000

|                     |                     |                     |
|---------------------|---------------------|---------------------|
| 14.7840003966999998 | 0.0000000000000000  | 0.0000000000000000  |
| -7.3920001983999999 | 12.8033199130999993 | 0.0000000000000000  |
| 0.0000000000000000  | 0.0000000000000000  | 26.7110004425000014 |

| Cu | N | C  | O | H |
|----|---|----|---|---|
| 4  | 9 | 64 | 4 | 2 |

Selective dynamics

Direct

|                    |                    |                    |   |   |   |
|--------------------|--------------------|--------------------|---|---|---|
| 0.3883999883824316 | 0.6109899878387068 | 0.1237199976883616 | F | F | F |
| 0.3601365527586912 | 0.5480908065740444 | 0.2066817769952869 | T | T | T |
| 0.2351739346962962 | 0.5729030563291452 | 0.2638945980739705 | T | T | T |
| 0.3503723595906915 | 0.6963555694716778 | 0.1892786190575972 | T | T | T |
| 0.327399989159151  | 0.6724299788206594 | 0.0770300030666817 | F | F | F |
| 0.3273600042078257 | 0.4895400106801233 | 0.0762199982880674 | F | F | F |
| 0.5102499723826810 | 0.6724500060481091 | 0.0761599987757577 | F | F | F |
| 0.9996700287274507 | 0.0001800000324650 | 0.0573600009216477 | F | F | F |
| 0.0003299999634265 | 0.3344300090962307 | 0.0625099986649431 | F | F | F |
| 0.9996899962509573 | 0.6666100025562471 | 0.0586999989901287 | F | F | F |
| 0.3332400024166660 | 0.0001599999854633 | 0.0586900003380535 | F | F | F |
| 0.6654199958038518 | 0.9995099902101501 | 0.0625599995251847 | F | F | F |
| 0.6666899919723832 | 0.3331600129459886 | 0.0612300001087860 | F | F | F |
| 0.3321700096157301 | 0.3312500119332853 | 0.0634699985367249 | F | F | F |
| 0.6686199903697627 | 0.6676899790852886 | 0.0635500028781806 | F | F | F |
| 0.9991999865008054 | 0.1663299948336885 | 0.0593199990547291 | F | F | F |
| 0.0001500000141448 | 0.5002700090658863 | 0.0620899982600847 | F | F | F |
| 0.9999099969734431 | 0.8333100080615523 | 0.0571499988286135 | F | F | F |
| 0.3328500091896487 | 0.1653199940614059 | 0.0589599981996258 | F | F | F |
| 0.3319799900125986 | 0.8348799943726348 | 0.0628399997826108 | F | F | F |

|                    |                    |                    |   |   |   |
|--------------------|--------------------|--------------------|---|---|---|
| 0.6658499836809995 | 0.1663399934903538 | 0.0614599995434091 | F | F | F |
| 0.6657000184196491 | 0.4994199871907909 | 0.0623999982923920 | F | F | F |
| 0.6680499911019240 | 0.8350800275685089 | 0.0631899982792987 | F | F | F |
| 0.1665399968694743 | 0.9999399781380731 | 0.0571300014870246 | F | F | F |
| 0.1647700071264779 | 0.3318099975501880 | 0.0630899965588227 | F | F | F |
| 0.1649599969669993 | 0.6678699851318157 | 0.0628300011305356 | F | F | F |
| 0.4995799959066858 | 0.9996899962566772 | 0.0621200017787373 | F | F | F |
| 0.5004400015054742 | 0.3341600000654878 | 0.0623699985549493 | F | F | F |
| 0.8335300087518434 | 0.0006599999888621 | 0.0593699999149706 | F | F | F |
| 0.8335000276869380 | 0.3339900076717370 | 0.0614399984580416 | F | F | F |
| 0.8345299959310495 | 0.6670100092759697 | 0.0590099990224289 | F | F | F |
| 0.1655199974769772 | 0.1649699956211279 | 0.0588000007106046 | F | F | F |
| 0.1689099967855014 | 0.5010300278786701 | 0.0695900022914344 | F | F | F |
| 0.1661600023717327 | 0.8336899876319350 | 0.0583200007559981 | F | F | F |
| 0.5000299811505329 | 0.1666100025210966 | 0.0600900016626156 | F | F | F |
| 0.4982599914069894 | 0.5016000270702463 | 0.0694800019188762 | F | F | F |
| 0.4988099932978187 | 0.8309299945801385 | 0.0696299970120435 | F | F | F |
| 0.8332399726153312 | 0.1666100025210966 | 0.0610099993636766 | F | F | F |
| 0.8332399726178181 | 0.4998199939886163 | 0.0600900016626156 | F | F | F |
| 0.8348900079967692 | 0.8343399763111563 | 0.0588699989124351 | F | F | F |
| 0.0547900013529556 | 0.1105799972670667 | 0.0582499988478276 | F | F | F |
| 0.0574500001527696 | 0.4450300037547379 | 0.0647099986659398 | F | F | F |
| 0.0552599988734528 | 0.7778099775364282 | 0.0577500015516321 | F | F | F |
| 0.3890799879994375 | 0.1110199987696632 | 0.0590200014557141 | F | F | F |
| 0.3847500086142546 | 0.4413599968097515 | 0.0698899999278808 | F | F | F |
| 0.3856300115637481 | 0.7774099707386029 | 0.0697999968969185 | F | F | F |
| 0.7216899990961423 | 0.1110199987696632 | 0.0616299994282770 | F | F | F |
| 0.7213600277433585 | 0.4436900019336107 | 0.0609799995887954 | F | F | F |
| 0.7239000201781849 | 0.7793800235195363 | 0.0617300011113215 | F | F | F |
| 0.0548500008969128 | 0.2779600024177142 | 0.0611100010467140 | F | F | F |
| 0.0548699982635696 | 0.6113299727824142 | 0.0609100013869721 | F | F | F |
| 0.0557399988174794 | 0.9441199898966843 | 0.0569700002542319 | F | F | F |
| 0.3894000053534441 | 0.2770200073944125 | 0.0612200014192723 | F | F | F |
| 0.3885200023536157 | 0.9449700116936768 | 0.0609200000764787 | F | F | F |
| 0.7219600081768291 | 0.2778800130081720 | 0.0612899996210956 | F | F | F |
| 0.7228400111134903 | 0.6104599833518947 | 0.0612800009690204 | F | F | F |
| 0.7218999862732431 | 0.9449999928237744 | 0.0611900016818296 | F | F | F |
| 0.2224700004002287 | 0.1112700029890163 | 0.0579399988155274 | F | F | F |
| 0.2239000052058842 | 0.4420799910817479 | 0.0698800012383671 | F | F | F |
| 0.2217099964610867 | 0.7781400084212819 | 0.0611599981631770 | F | F | F |
| 0.5554500222519394 | 0.1106600016727199 | 0.0609599985034350 | F | F | F |
| 0.5538799763018645 | 0.4459800124308089 | 0.0648500025197052 | F | F | F |
| 0.5577600002220393 | 0.7759199738370555 | 0.0699200034090950 | F | F | F |
| 0.8886299729346163 | 0.1112200022076308 | 0.0597000010326383 | F | F | F |

|                    |                    |                    |   |   |   |
|--------------------|--------------------|--------------------|---|---|---|
| 0.8891900181671417 | 0.4444000124669500 | 0.0609400011618462 | F | F | F |
| 0.8885800242332564 | 0.7773900031831715 | 0.0579899996383304 | F | F | F |
| 0.2204699963058161 | 0.2759700119173587 | 0.0616400018241308 | F | F | F |
| 0.2224200070404621 | 0.6142200231952089 | 0.0697799995553297 | F | F | F |
| 0.2220399975825629 | 0.9445899725293785 | 0.0577399991557783 | F | F | F |
| 0.5561599731237834 | 0.2784900069045193 | 0.0609700009367202 | F | F | F |
| 0.5584899783382440 | 0.6151199936777303 | 0.0699099972694697 | F | F | F |
| 0.5548200011515050 | 0.9423800111137410 | 0.0647599995261743 | F | F | F |
| 0.8888199925564066 | 0.2781499922028985 | 0.0615999996534029 | F | F | F |
| 0.8888300061197185 | 0.6107800006620749 | 0.0590399987973029 | F | F | F |
| 0.8892800212255736 | 0.9450600147559953 | 0.0582900010185554 | F | F | F |
| 0.2147342179308109 | 0.7555941700337186 | 0.2270465478450666 | T | T | T |
| 0.1713827089748150 | 0.6516202127872168 | 0.2572236460402670 | T | T | T |
| 0.1535560760484673 | 0.7919089224581932 | 0.2269901476802675 | T | T | T |
| 0.3025969502818148 | 0.7925655534436001 | 0.2047401734361715 | T | T | T |
| 0.2943749658232392 | 0.4859291238773017 | 0.2707122222426989 | T | T | T |
| 0.0775962233054554 | 0.6268825711748679 | 0.2713367400886015 | T | T | T |
| 0.0737423968677643 | 0.6921893817210865 | 0.2572390865463273 | T | T | T |
| 0.3418627358593778 | 0.5024963934203127 | 0.2988633268111212 | T | T | T |

Structure07

\*OH+\*COCOHO\*

1.0000000000000000

|                     |                     |                     |
|---------------------|---------------------|---------------------|
| 14.7840003966999998 | 0.0000000000000000  | 0.0000000000000000  |
| -7.3920001983999999 | 12.8033199130999993 | 0.0000000000000000  |
| 0.0000000000000000  | 0.0000000000000000  | 26.7110004425000014 |

|    |   |    |   |   |
|----|---|----|---|---|
| Cu | N | C  | O | H |
| 4  | 9 | 64 | 4 | 2 |

Selective dynamics

Direct

|                    |                    |                    |   |   |   |
|--------------------|--------------------|--------------------|---|---|---|
| 0.3883999883824316 | 0.6109899878387068 | 0.1237199976883616 | F | F | F |
| 0.3491402456532064 | 0.5181851970131287 | 0.1995173431759683 | T | T | T |
| 0.2041997530193716 | 0.5238204329011008 | 0.2439730878501593 | T | T | T |
| 0.3653131592555764 | 0.6832372571867946 | 0.1984853668063657 | T | T | T |
| 0.3273999989159151 | 0.6724299788206594 | 0.0770300030666817 | F | F | F |
| 0.3273600042078257 | 0.4895400106801233 | 0.0762199982880674 | F | F | F |
| 0.5102499723826810 | 0.6724500060481091 | 0.0761599987757577 | F | F | F |
| 0.9996700287274507 | 0.0001800000324650 | 0.0573600009216477 | F | F | F |
| 0.0003299999634265 | 0.3344300090962307 | 0.0625099986649431 | F | F | F |
| 0.9996899962509573 | 0.6666100025562471 | 0.0586999989901287 | F | F | F |
| 0.3332400024166660 | 0.0001599999854633 | 0.0586900003380535 | F | F | F |
| 0.6654199958038518 | 0.9995099902101501 | 0.0625599995251847 | F | F | F |
| 0.6666899919723832 | 0.3331600129459886 | 0.0612300001087860 | F | F | F |
| 0.3321700096157301 | 0.3312500119332853 | 0.0634699985367249 | F | F | F |



|                    |                    |                    |   |   |   |
|--------------------|--------------------|--------------------|---|---|---|
| 0.6686199903697627 | 0.6676899790852886 | 0.0635500028781806 | F | F | F |
| 0.9991999865008054 | 0.1663299948336885 | 0.0593199990547291 | F | F | F |
| 0.0001500000141448 | 0.5002700090658863 | 0.0620899982600847 | F | F | F |
| 0.9999099969734431 | 0.8333100080615523 | 0.0571499988286135 | F | F | F |
| 0.3328500091896487 | 0.1653199940614059 | 0.0589599981996258 | F | F | F |
| 0.3319799900125986 | 0.8348799943726348 | 0.0628399997826108 | F | F | F |
| 0.6658499836809995 | 0.1663399934903538 | 0.0614599995434091 | F | F | F |
| 0.6657000184196491 | 0.4994199871907909 | 0.0623999982923920 | F | F | F |
| 0.6680499911019240 | 0.8350800275685089 | 0.0631899982792987 | F | F | F |
| 0.1665399968694743 | 0.9999399781380731 | 0.0571300014870246 | F | F | F |
| 0.1647700071264779 | 0.3318099975501880 | 0.0630899965588227 | F | F | F |
| 0.1649599969669993 | 0.6678699851318157 | 0.0628300011305356 | F | F | F |
| 0.4995799959066858 | 0.9996899962566772 | 0.0621200017787373 | F | F | F |
| 0.5004400015054742 | 0.3341600000654878 | 0.0623699985549493 | F | F | F |
| 0.8335300087518434 | 0.0006599999888621 | 0.0593699999149706 | F | F | F |
| 0.8335000276869380 | 0.3339900076717370 | 0.0614399984580416 | F | F | F |
| 0.8345299959310495 | 0.6670100092759697 | 0.0590099990224289 | F | F | F |
| 0.1655199974769772 | 0.1649699956211279 | 0.0588000007106046 | F | F | F |
| 0.1689099967855014 | 0.5010300278786701 | 0.0695900022914344 | F | F | F |
| 0.1661600023717327 | 0.8336899876319350 | 0.0583200007559981 | F | F | F |
| 0.5000299811505329 | 0.1666100025210966 | 0.0600900016626156 | F | F | F |
| 0.4982599914069894 | 0.5016000270702463 | 0.0694800019188762 | F | F | F |
| 0.4988099932978187 | 0.8309299945801385 | 0.0696299970120435 | F | F | F |
| 0.8332399726153312 | 0.1666100025210966 | 0.0610099993636766 | F | F | F |
| 0.8332399726178181 | 0.4998199939886163 | 0.0600900016626156 | F | F | F |
| 0.8348900079967692 | 0.8343399763111563 | 0.0588699989124351 | F | F | F |
| 0.0547900013529556 | 0.1105799972670667 | 0.0582499988478276 | F | F | F |
| 0.0574500001527696 | 0.4450300037547379 | 0.0647099986659398 | F | F | F |
| 0.0552599988734528 | 0.7778099775364282 | 0.0577500015516321 | F | F | F |
| 0.3890799879994375 | 0.1110199987696632 | 0.0590200014557141 | F | F | F |
| 0.3847500086142546 | 0.4413599968097515 | 0.0698899999278808 | F | F | F |
| 0.3856300115637481 | 0.7774099707386029 | 0.0697999968969185 | F | F | F |
| 0.7216899990961423 | 0.1110199987696632 | 0.0616299994282770 | F | F | F |
| 0.7213600277433585 | 0.4436900019336107 | 0.0609799995887954 | F | F | F |
| 0.7239000201781849 | 0.7793800235195363 | 0.0617300011113215 | F | F | F |
| 0.0548500008969128 | 0.2779600024177142 | 0.0611100010467140 | F | F | F |
| 0.0548699982635696 | 0.6113299727824142 | 0.0609100013869721 | F | F | F |
| 0.0557399988174794 | 0.9441199898966843 | 0.0569700002542319 | F | F | F |
| 0.3894000053534441 | 0.2770200073944125 | 0.0612200014192723 | F | F | F |
| 0.3885200023536157 | 0.9449700116936768 | 0.0609200000764787 | F | F | F |
| 0.7219600081768291 | 0.2778800130081720 | 0.0612899996210956 | F | F | F |
| 0.7228400111134903 | 0.6104599833518947 | 0.0612800009690204 | F | F | F |
| 0.7218999862732431 | 0.9449999928237744 | 0.0611900016818296 | F | F | F |
| 0.2224700004002287 | 0.1112700029890163 | 0.0579399988155274 | F | F | F |

|                    |                    |                    |   |   |   |
|--------------------|--------------------|--------------------|---|---|---|
| 0.2239000052058842 | 0.4420799910817479 | 0.0698800012383671 | F | F | F |
| 0.2217099964610867 | 0.7781400084212819 | 0.0611599981631770 | F | F | F |
| 0.5554500222519394 | 0.1106600016727199 | 0.0609599985034350 | F | F | F |
| 0.5538799763018645 | 0.4459800124308089 | 0.0648500025197052 | F | F | F |
| 0.5577600002220393 | 0.7759199738370555 | 0.0699200034090950 | F | F | F |
| 0.8886299729346163 | 0.1112200022076308 | 0.0597000010326383 | F | F | F |
| 0.8891900181671417 | 0.4444000124669500 | 0.0609400011618462 | F | F | F |
| 0.8885800242332564 | 0.7773900031831715 | 0.0579899996383304 | F | F | F |
| 0.2204699963058161 | 0.2759700119173587 | 0.0616400018241308 | F | F | F |
| 0.2224200070404621 | 0.6142200231952089 | 0.0697799995553297 | F | F | F |
| 0.2220399975825629 | 0.9445899725293785 | 0.0577399991557783 | F | F | F |
| 0.5561599731237834 | 0.2784900069045193 | 0.0609700009367202 | F | F | F |
| 0.5584899783382440 | 0.6151199936777303 | 0.0699099972694697 | F | F | F |
| 0.5548200011515050 | 0.9423800111137410 | 0.0647599995261743 | F | F | F |
| 0.8888199925564066 | 0.2781499922028985 | 0.0615999996534029 | F | F | F |
| 0.8888300061197185 | 0.6107800006620749 | 0.0590399987973029 | F | F | F |
| 0.8892800212255736 | 0.9450600147559953 | 0.0582900010185554 | F | F | F |
| 0.2350812760573652 | 0.7307031950963534 | 0.2509772692670386 | T | T | T |
| 0.1570348092405540 | 0.6188344866868898 | 0.2336960751118864 | T | T | T |
| 0.1986060014243289 | 0.7772278099822137 | 0.2812287487636634 | T | T | T |
| 0.3296467544009953 | 0.7749407138502522 | 0.2392620122640766 | T | T | T |
| 0.2475368363175162 | 0.4214505456315076 | 0.2475980211128612 | T | T | T |
| 0.0803333210467089 | 0.6064947447048440 | 0.2092604320221075 | T | T | T |
| 0.2767782979325688 | 0.4185393075950032 | 0.2798116678693891 | T | T | T |
| 0.2575394205225174 | 0.8454708696413644 | 0.2910982473069549 | T | T | T |

Structure08

\*OH+\*COCOO\*H

1.0000000000000000

|                     |                     |                     |
|---------------------|---------------------|---------------------|
| 14.7840003966999998 | 0.0000000000000000  | 0.0000000000000000  |
| -7.3920001983999999 | 12.8033199130999993 | 0.0000000000000000  |
| 0.0000000000000000  | 0.0000000000000000  | 26.7110004425000014 |

|    |   |    |   |   |
|----|---|----|---|---|
| Cu | N | C  | O | H |
| 4  | 9 | 64 | 4 | 2 |

Selective dynamics

Direct

|                    |                    |                    |   |   |   |
|--------------------|--------------------|--------------------|---|---|---|
| 0.3883999883824316 | 0.6109899878387068 | 0.1237199976883616 | F | F | F |
| 0.3457723918583348 | 0.5195599439098252 | 0.2005635609097721 | T | T | T |
| 0.2022005384552982 | 0.5310752156823808 | 0.2430872965550784 | T | T | T |
| 0.3657072310709852 | 0.6854321731994477 | 0.1976026595973593 | T | T | T |
| 0.3273999989159151 | 0.6724299788206594 | 0.0770300030666817 | F | F | F |
| 0.3273600042078257 | 0.4895400106801233 | 0.0762199982880674 | F | F | F |
| 0.5102499723826810 | 0.6724500060481091 | 0.0761599987757577 | F | F | F |
| 0.9996700287274507 | 0.0001800000324650 | 0.0573600009216477 | F | F | F |

|                    |                    |                    |   |   |   |
|--------------------|--------------------|--------------------|---|---|---|
| 0.0003299999634265 | 0.3344300090962307 | 0.0625099986649431 | F | F | F |
| 0.9996899962509573 | 0.6666100025562471 | 0.0586999989901287 | F | F | F |
| 0.3332400024166660 | 0.0001599999854633 | 0.0586900003380535 | F | F | F |
| 0.6654199958038518 | 0.9995099902101501 | 0.0625599995251847 | F | F | F |
| 0.6666899919723832 | 0.3331600129459886 | 0.0612300001087860 | F | F | F |
| 0.3321700096157301 | 0.3312500119332853 | 0.0634699985367249 | F | F | F |
| 0.6686199903697627 | 0.6676899790852886 | 0.0635500028781806 | F | F | F |
| 0.9991999865008054 | 0.1663299948336885 | 0.0593199990547291 | F | F | F |
| 0.0001500000141448 | 0.5002700090658863 | 0.0620899982600847 | F | F | F |
| 0.9999099969734431 | 0.8333100080615523 | 0.0571499988286135 | F | F | F |
| 0.3328500091896487 | 0.1653199940614059 | 0.0589599981996258 | F | F | F |
| 0.3319799900125986 | 0.8348799943726348 | 0.0628399997826108 | F | F | F |
| 0.6658499836809995 | 0.1663399934903538 | 0.0614599995434091 | F | F | F |
| 0.6657000184196491 | 0.4994199871907909 | 0.0623999982923920 | F | F | F |
| 0.6680499911019240 | 0.8350800275685089 | 0.0631899982792987 | F | F | F |
| 0.1665399968694743 | 0.9999399781380731 | 0.0571300014870246 | F | F | F |
| 0.1647700071264779 | 0.3318099975501880 | 0.0630899965588227 | F | F | F |
| 0.1649599969669993 | 0.6678699851318157 | 0.0628300011305356 | F | F | F |
| 0.4995799959066858 | 0.9996899962566772 | 0.0621200017787373 | F | F | F |
| 0.5004400015054742 | 0.3341600000654878 | 0.0623699985549493 | F | F | F |
| 0.8335300087518434 | 0.0006599999888621 | 0.0593699999149706 | F | F | F |
| 0.8335000276869380 | 0.3339900076717370 | 0.0614399984580416 | F | F | F |
| 0.8345299959310495 | 0.6670100092759697 | 0.0590099990224289 | F | F | F |
| 0.1655199974769772 | 0.1649699956211279 | 0.0588000007106046 | F | F | F |
| 0.1689099967855014 | 0.5010300278786701 | 0.0695900022914344 | F | F | F |
| 0.1661600023717327 | 0.8336899876319350 | 0.0583200007559981 | F | F | F |
| 0.5000299811505329 | 0.1666100025210966 | 0.0600900016626156 | F | F | F |
| 0.4982599914069894 | 0.5016000270702463 | 0.0694800019188762 | F | F | F |
| 0.4988099932978187 | 0.8309299945801385 | 0.0696299970120435 | F | F | F |
| 0.8332399726153312 | 0.1666100025210966 | 0.0610099993636766 | F | F | F |
| 0.8332399726178181 | 0.4998199939886163 | 0.0600900016626156 | F | F | F |
| 0.8348900079967692 | 0.8343399763111563 | 0.0588699989124351 | F | F | F |
| 0.0547900013529556 | 0.1105799972670667 | 0.0582499988478276 | F | F | F |
| 0.0574500001527696 | 0.4450300037547379 | 0.0647099986659398 | F | F | F |
| 0.0552599988734528 | 0.7778099775364282 | 0.0577500015516321 | F | F | F |
| 0.3890799879994375 | 0.1110199987696632 | 0.0590200014557141 | F | F | F |
| 0.3847500086142546 | 0.4413599968097515 | 0.0698899999278808 | F | F | F |
| 0.3856300115637481 | 0.7774099707386029 | 0.0697999968969185 | F | F | F |
| 0.7216899990961423 | 0.1110199987696632 | 0.0616299994282770 | F | F | F |
| 0.7213600277433585 | 0.4436900019336107 | 0.0609799995887954 | F | F | F |
| 0.7239000201781849 | 0.7793800235195363 | 0.0617300011113215 | F | F | F |
| 0.0548500008969128 | 0.2779600024177142 | 0.0611100010467140 | F | F | F |
| 0.0548699982635696 | 0.6113299727824142 | 0.0609100013869721 | F | F | F |
| 0.0557399988174794 | 0.9441199898966843 | 0.0569700002542319 | F | F | F |

|                    |                    |                    |   |   |   |
|--------------------|--------------------|--------------------|---|---|---|
| 0.3894000053534441 | 0.2770200073944125 | 0.0612200014192723 | F | F | F |
| 0.3885200023536157 | 0.9449700116936768 | 0.0609200000764787 | F | F | F |
| 0.7219600081768291 | 0.2778800130081720 | 0.0612899996210956 | F | F | F |
| 0.7228400111134903 | 0.6104599833518947 | 0.0612800009690204 | F | F | F |
| 0.7218999862732431 | 0.9449999928237744 | 0.0611900016818296 | F | F | F |
| 0.2224700004002287 | 0.1112700029890163 | 0.0579399988155274 | F | F | F |
| 0.2239000052058842 | 0.4420799910817479 | 0.0698800012383671 | F | F | F |
| 0.2217099964610867 | 0.7781400084212819 | 0.0611599981631770 | F | F | F |
| 0.5554500222519394 | 0.1106600016727199 | 0.0609599985034350 | F | F | F |
| 0.5538799763018645 | 0.4459800124308089 | 0.0648500025197052 | F | F | F |
| 0.5577600002220393 | 0.7759199738370555 | 0.0699200034090950 | F | F | F |
| 0.8886299729346163 | 0.1112200022076308 | 0.0597000010326383 | F | F | F |
| 0.8891900181671417 | 0.4444000124669500 | 0.0609400011618462 | F | F | F |
| 0.8885800242332564 | 0.7773900031831715 | 0.0579899996383304 | F | F | F |
| 0.2204699963058161 | 0.2759700119173587 | 0.0616400018241308 | F | F | F |
| 0.2224200070404621 | 0.6142200231952089 | 0.0697799995553297 | F | F | F |
| 0.2220399975825629 | 0.9445899725293785 | 0.0577399991557783 | F | F | F |
| 0.5561599731237834 | 0.2784900069045193 | 0.0609700009367202 | F | F | F |
| 0.5584899783382440 | 0.6151199936777303 | 0.0699099972694697 | F | F | F |
| 0.5548200011515050 | 0.9423800111137410 | 0.0647599995261743 | F | F | F |
| 0.8888199925564066 | 0.2781499922028985 | 0.0615999996534029 | F | F | F |
| 0.8888300061197185 | 0.6107800006620749 | 0.0590399987973029 | F | F | F |
| 0.8892800212255736 | 0.9450600147559953 | 0.0582900010185554 | F | F | F |
| 0.2251040722829709 | 0.7358173140657215 | 0.2554523712898639 | T | T | T |
| 0.1574150098459592 | 0.6274568709159160 | 0.2309982293367944 | T | T | T |
| 0.2035097920982849 | 0.7771405361773478 | 0.2887542348953171 | T | T | T |
| 0.3286346338053759 | 0.7828187300786131 | 0.2365447448862285 | T | T | T |
| 0.2415070909368721 | 0.4258008085862168 | 0.2482623135459354 | T | T | T |
| 0.0847047860555301 | 0.6158109576213924 | 0.2036910615180158 | T | T | T |
| 0.2683736346138429 | 0.4214371305210587 | 0.2808947544634058 | T | T | T |
| 0.3731437242005118 | 0.8453859137977791 | 0.2565010647450537 | T | T | T |

### Structure09

\*COCOO\*

1.0000000000000000

|                     |                     |                     |
|---------------------|---------------------|---------------------|
| 14.7840003966999998 | 0.0000000000000000  | 0.0000000000000000  |
| -7.3920001983999999 | 12.8033199130999993 | 0.0000000000000000  |
| 0.0000000000000000  | 0.0000000000000000  | 26.7110004425000014 |

Cu N C O  
4 9 64 3

Selective dynamics

Direct

|                    |                    |                    |   |   |   |
|--------------------|--------------------|--------------------|---|---|---|
| 0.3883999883824316 | 0.6109899878387068 | 0.1237199976883616 | F | F | F |
| 0.4236768266358624 | 0.5645346432278657 | 0.2020598536475759 | F | F | F |

|                    |                    |                    |   |   |   |
|--------------------|--------------------|--------------------|---|---|---|
| 0.2639509989035602 | 0.5801479599939583 | 0.1935216703132738 | F | F | F |
| 0.4340973036528339 | 0.7283825546935816 | 0.1963555277731004 | F | F | F |
| 0.3273999989159151 | 0.6724299788206594 | 0.0770300030666817 | F | F | F |
| 0.3273600042078257 | 0.4895400106801233 | 0.0762199982880674 | F | F | F |
| 0.5102499723826810 | 0.6724500060481091 | 0.0761599987757577 | F | F | F |
| 0.9996700287274507 | 0.0001800000324650 | 0.0573600009216477 | F | F | F |
| 0.0003299999634265 | 0.3344300090962307 | 0.0625099986649431 | F | F | F |
| 0.9996899962509573 | 0.6666100025562471 | 0.0586999989901287 | F | F | F |
| 0.3332400024166660 | 0.000159999854633  | 0.0586900003380535 | F | F | F |
| 0.6654199958038518 | 0.9995099902101501 | 0.0625599995251847 | F | F | F |
| 0.6666899919723832 | 0.3331600129459886 | 0.0612300001087860 | F | F | F |
| 0.3321700096157301 | 0.3312500119332853 | 0.0634699985367249 | F | F | F |
| 0.6686199903697627 | 0.6676899790852886 | 0.0635500028781806 | F | F | F |
| 0.9991999865008054 | 0.1663299948336885 | 0.0593199990547291 | F | F | F |
| 0.0001500000141448 | 0.5002700090658863 | 0.0620899982600847 | F | F | F |
| 0.9999099969734431 | 0.8333100080615523 | 0.0571499988286135 | F | F | F |
| 0.3328500091896487 | 0.1653199940614059 | 0.0589599981996258 | F | F | F |
| 0.3319799900125986 | 0.8348799943726348 | 0.0628399997826108 | F | F | F |
| 0.6658499836809995 | 0.1663399934903538 | 0.0614599995434091 | F | F | F |
| 0.6657000184196491 | 0.4994199871907909 | 0.0623999982923920 | F | F | F |
| 0.6680499911019240 | 0.8350800275685089 | 0.0631899982792987 | F | F | F |
| 0.1665399968694743 | 0.9999399781380731 | 0.0571300014870246 | F | F | F |
| 0.1647700071264779 | 0.3318099975501880 | 0.0630899965588227 | F | F | F |
| 0.1649599969669993 | 0.6678699851318157 | 0.0628300011305356 | F | F | F |
| 0.4995799959066858 | 0.9996899962566772 | 0.0621200017787373 | F | F | F |
| 0.5004400015054742 | 0.3341600000654878 | 0.0623699985549493 | F | F | F |
| 0.8335300087518434 | 0.0006599999888621 | 0.0593699999149706 | F | F | F |
| 0.8335000276869380 | 0.3339900076717370 | 0.0614399984580416 | F | F | F |
| 0.8345299959310495 | 0.6670100092759697 | 0.0590099990224289 | F | F | F |
| 0.1655199974769772 | 0.1649699956211279 | 0.0588000007106046 | F | F | F |
| 0.1689099967855014 | 0.5010300278786701 | 0.0695900022914344 | F | F | F |
| 0.1661600023717327 | 0.8336899876319350 | 0.0583200007559981 | F | F | F |
| 0.5000299811505329 | 0.1666100025210966 | 0.0600900016626156 | F | F | F |
| 0.4982599914069894 | 0.5016000270702463 | 0.0694800019188762 | F | F | F |
| 0.4988099932978187 | 0.8309299945801385 | 0.0696299970120435 | F | F | F |
| 0.8332399726153312 | 0.1666100025210966 | 0.0610099993636766 | F | F | F |
| 0.8332399726178181 | 0.4998199939886163 | 0.0600900016626156 | F | F | F |
| 0.8348900079967692 | 0.8343399763111563 | 0.0588699989124351 | F | F | F |
| 0.0547900013529556 | 0.1105799972670667 | 0.0582499988478276 | F | F | F |
| 0.0574500001527696 | 0.4450300037547379 | 0.0647099986659398 | F | F | F |
| 0.0552599988734528 | 0.7778099775364282 | 0.0577500015516321 | F | F | F |
| 0.3890799879994375 | 0.1110199987696632 | 0.0590200014557141 | F | F | F |
| 0.3847500086142546 | 0.4413599968097515 | 0.0698899999278808 | F | F | F |
| 0.3856300115637481 | 0.7774099707386029 | 0.0697999968969185 | F | F | F |

|                    |                    |                    |   |   |   |
|--------------------|--------------------|--------------------|---|---|---|
| 0.7216899990961423 | 0.1110199987696632 | 0.0616299994282770 | F | F | F |
| 0.7213600277433585 | 0.4436900019336107 | 0.0609799995887954 | F | F | F |
| 0.7239000201781849 | 0.7793800235195363 | 0.0617300011113215 | F | F | F |
| 0.0548500008969128 | 0.2779600024177142 | 0.0611100010467140 | F | F | F |
| 0.0548699982635696 | 0.6113299727824142 | 0.0609100013869721 | F | F | F |
| 0.0557399988174794 | 0.9441199898966843 | 0.0569700002542319 | F | F | F |
| 0.3894000053534441 | 0.2770200073944125 | 0.0612200014192723 | F | F | F |
| 0.3885200023536157 | 0.9449700116936768 | 0.0609200000764787 | F | F | F |
| 0.7219600081768291 | 0.2778800130081720 | 0.0612899996210956 | F | F | F |
| 0.7228400111134903 | 0.6104599833518947 | 0.0612800009690204 | F | F | F |
| 0.7218999862732431 | 0.9449999928237744 | 0.0611900016818296 | F | F | F |
| 0.2224700004002287 | 0.1112700029890163 | 0.0579399988155274 | F | F | F |
| 0.2239000052058842 | 0.4420799910817479 | 0.0698800012383671 | F | F | F |
| 0.2217099964610867 | 0.7781400084212819 | 0.0611599981631770 | F | F | F |
| 0.5554500222519394 | 0.1106600016727199 | 0.0609599985034350 | F | F | F |
| 0.5538799763018645 | 0.4459800124308089 | 0.0648500025197052 | F | F | F |
| 0.5577600002220393 | 0.7759199738370555 | 0.0699200034090950 | F | F | F |
| 0.8886299729346163 | 0.1112200022076308 | 0.0597000010326383 | F | F | F |
| 0.8891900181671417 | 0.4444000124669500 | 0.0609400011618462 | F | F | F |
| 0.8885800242332564 | 0.7773900031831715 | 0.0579899996383304 | F | F | F |
| 0.2204699963058161 | 0.2759700119173587 | 0.0616400018241308 | F | F | F |
| 0.2224200070404621 | 0.6142200231952089 | 0.0697799995553297 | F | F | F |
| 0.2220399975825629 | 0.9445899725293785 | 0.0577399991557783 | F | F | F |
| 0.5561599731237834 | 0.2784900069045193 | 0.0609700009367202 | F | F | F |
| 0.5584899783382440 | 0.6151199936777303 | 0.0699099972694697 | F | F | F |
| 0.5548200011515050 | 0.9423800111137410 | 0.0647599995261743 | F | F | F |
| 0.8888199925564066 | 0.2781499922028985 | 0.0615999996534029 | F | F | F |
| 0.8888300061197185 | 0.6107800006620749 | 0.0590399987973029 | F | F | F |
| 0.8892800212255736 | 0.9450600147559953 | 0.0582900010185554 | F | F | F |
| 0.2907546463969766 | 0.7711606188764364 | 0.2404475979300429 | T | T | T |
| 0.2157360134614024 | 0.6790097944889339 | 0.2037949122865967 | T | T | T |
| 0.2519863227255215 | 0.7943196024726262 | 0.2750620291922985 | T | T | T |
| 0.3893280555106315 | 0.8132782287471301 | 0.2284748761498960 | T | T | T |
| 0.1506503247452358 | 0.6858822291068593 | 0.1782023433406097 | T | T | T |

### Structure10

\*CHOCOO\*

1.0000000000000000

|                     |                     |                     |
|---------------------|---------------------|---------------------|
| 14.7840003966999998 | 0.0000000000000000  | 0.0000000000000000  |
| -7.3920001983999999 | 12.8033199130999993 | 0.0000000000000000  |
| 0.0000000000000000  | 0.0000000000000000  | 26.7110004425000014 |

| Cu | N | C  | O | H |
|----|---|----|---|---|
| 4  | 9 | 64 | 3 | 1 |

Selective dynamics

Direct

|                    |                    |                    |   |   |   |
|--------------------|--------------------|--------------------|---|---|---|
| 0.3883999883824316 | 0.6109899878387068 | 0.1237199976883616 | F | F | F |
| 0.4333828095814956 | 0.5762234667229466 | 0.2023366127165808 | T | T | T |
| 0.2707930774006564 | 0.5760697913715350 | 0.1936935855474118 | T | T | T |
| 0.4298718240502113 | 0.7350902309472035 | 0.1929590627153832 | T | T | T |
| 0.3273999989159151 | 0.6724299788206594 | 0.0770300030666817 | F | F | F |
| 0.3273600042078257 | 0.4895400106801233 | 0.0762199982880674 | F | F | F |
| 0.5102499723826810 | 0.6724500060481091 | 0.0761599987757577 | F | F | F |
| 0.9996700287274507 | 0.0001800000324650 | 0.0573600009216477 | F | F | F |
| 0.0003299999634265 | 0.3344300090962307 | 0.0625099986649431 | F | F | F |
| 0.9996899962509573 | 0.6666100025562471 | 0.0586999989901287 | F | F | F |
| 0.3332400024166660 | 0.0001599999854633 | 0.0586900003380535 | F | F | F |
| 0.6654199958038518 | 0.9995099902101501 | 0.0625599995251847 | F | F | F |
| 0.6666899919723832 | 0.3331600129459886 | 0.0612300001087860 | F | F | F |
| 0.3321700096157301 | 0.3312500119332853 | 0.0634699985367249 | F | F | F |
| 0.6686199903697627 | 0.6676899790852886 | 0.0635500028781806 | F | F | F |
| 0.9991999865008054 | 0.1663299948336885 | 0.0593199990547291 | F | F | F |
| 0.0001500000141448 | 0.5002700090658863 | 0.0620899982600847 | F | F | F |
| 0.9999099969734431 | 0.8333100080615523 | 0.0571499988286135 | F | F | F |
| 0.3328500091896487 | 0.1653199940614059 | 0.0589599981996258 | F | F | F |
| 0.3319799900125986 | 0.8348799943726348 | 0.0628399997826108 | F | F | F |
| 0.6658499836809995 | 0.1663399934903538 | 0.0614599995434091 | F | F | F |
| 0.6657000184196491 | 0.4994199871907909 | 0.0623999982923920 | F | F | F |
| 0.6680499911019240 | 0.8350800275685089 | 0.0631899982792987 | F | F | F |
| 0.1665399968694743 | 0.9999399781380731 | 0.0571300014870246 | F | F | F |
| 0.1647700071264779 | 0.3318099975501880 | 0.0630899965588227 | F | F | F |
| 0.1649599969669993 | 0.6678699851318157 | 0.0628300011305356 | F | F | F |
| 0.4995799959066858 | 0.9996899962566772 | 0.0621200017787373 | F | F | F |
| 0.5004400015054742 | 0.3341600000654878 | 0.0623699985549493 | F | F | F |
| 0.8335300087518434 | 0.0006599999888621 | 0.0593699999149706 | F | F | F |
| 0.8335000276869380 | 0.3339900076717370 | 0.0614399984580416 | F | F | F |
| 0.8345299959310495 | 0.6670100092759697 | 0.0590099990224289 | F | F | F |
| 0.1655199974769772 | 0.1649699956211279 | 0.0588000007106046 | F | F | F |
| 0.1689099967855014 | 0.5010300278786701 | 0.0695900022914344 | F | F | F |
| 0.1661600023717327 | 0.8336899876319350 | 0.0583200007559981 | F | F | F |
| 0.5000299811505329 | 0.1666100025210966 | 0.0600900016626156 | F | F | F |
| 0.4982599914069894 | 0.5016000270702463 | 0.0694800019188762 | F | F | F |
| 0.4988099932978187 | 0.8309299945801385 | 0.0696299970120435 | F | F | F |
| 0.8332399726153312 | 0.1666100025210966 | 0.0610099993636766 | F | F | F |
| 0.8332399726178181 | 0.4998199939886163 | 0.0600900016626156 | F | F | F |
| 0.8348900079967692 | 0.8343399763111563 | 0.0588699989124351 | F | F | F |
| 0.0547900013529556 | 0.1105799972670667 | 0.0582499988478276 | F | F | F |
| 0.0574500001527696 | 0.4450300037547379 | 0.0647099986659398 | F | F | F |
| 0.0552599988734528 | 0.7778099775364282 | 0.0577500015516321 | F | F | F |

|                    |                    |                    |   |   |   |
|--------------------|--------------------|--------------------|---|---|---|
| 0.3890799879994375 | 0.1110199987696632 | 0.0590200014557141 | F | F | F |
| 0.3847500086142546 | 0.4413599968097515 | 0.0698899999278808 | F | F | F |
| 0.3856300115637481 | 0.7774099707386029 | 0.0697999968969185 | F | F | F |
| 0.7216899990961423 | 0.1110199987696632 | 0.0616299994282770 | F | F | F |
| 0.7213600277433585 | 0.4436900019336107 | 0.0609799995887954 | F | F | F |
| 0.7239000201781849 | 0.7793800235195363 | 0.0617300011113215 | F | F | F |
| 0.0548500008969128 | 0.2779600024177142 | 0.0611100010467140 | F | F | F |
| 0.0548699982635696 | 0.6113299727824142 | 0.0609100013869721 | F | F | F |
| 0.0557399988174794 | 0.9441199898966843 | 0.0569700002542319 | F | F | F |
| 0.3894000053534441 | 0.2770200073944125 | 0.0612200014192723 | F | F | F |
| 0.3885200023536157 | 0.9449700116936768 | 0.0609200000764787 | F | F | F |
| 0.7219600081768291 | 0.2778800130081720 | 0.0612899996210956 | F | F | F |
| 0.7228400111134903 | 0.6104599833518947 | 0.0612800009690204 | F | F | F |
| 0.7218999862732431 | 0.9449999928237744 | 0.0611900016818296 | F | F | F |
| 0.2224700004002287 | 0.1112700029890163 | 0.0579399988155274 | F | F | F |
| 0.2239000052058842 | 0.4420799910817479 | 0.0698800012383671 | F | F | F |
| 0.2217099964610867 | 0.7781400084212819 | 0.0611599981631770 | F | F | F |
| 0.5554500222519394 | 0.1106600016727199 | 0.0609599985034350 | F | F | F |
| 0.5538799763018645 | 0.4459800124308089 | 0.0648500025197052 | F | F | F |
| 0.5577600002220393 | 0.7759199738370555 | 0.0699200034090950 | F | F | F |
| 0.8886299729346163 | 0.1112200022076308 | 0.0597000010326383 | F | F | F |
| 0.8891900181671417 | 0.4444000124669500 | 0.0609400011618462 | F | F | F |
| 0.8885800242332564 | 0.7773900031831715 | 0.0579899996383304 | F | F | F |
| 0.2204699963058161 | 0.2759700119173587 | 0.0616400018241308 | F | F | F |
| 0.2224200070404621 | 0.6142200231952089 | 0.0697799995553297 | F | F | F |
| 0.2220399975825629 | 0.9445899725293785 | 0.0577399991557783 | F | F | F |
| 0.5561599731237834 | 0.2784900069045193 | 0.0609700009367202 | F | F | F |
| 0.5584899783382440 | 0.6151199936777303 | 0.0699099972694697 | F | F | F |
| 0.5548200011515050 | 0.9423800111137410 | 0.0647599995261743 | F | F | F |
| 0.8888199925564066 | 0.2781499922028985 | 0.0615999996534029 | F | F | F |
| 0.8888300061197185 | 0.6107800006620749 | 0.0590399987973029 | F | F | F |
| 0.8892800212255736 | 0.9450600147559953 | 0.0582900010185554 | F | F | F |
| 0.2990035404637406 | 0.7855635279190334 | 0.2420136555383855 | T | T | T |
| 0.2161660012239930 | 0.6837161522606909 | 0.2165943322584861 | T | T | T |
| 0.2646371901586270 | 0.8213208434152196 | 0.2734804926089576 | T | T | T |
| 0.3959003018966486 | 0.8249465948140762 | 0.2279624531193454 | T | T | T |
| 0.1563189036457325 | 0.6789896244037669 | 0.1833529420568641 | T | T | T |
| 0.1965116207394271 | 0.6068625707080392 | 0.2391027884736013 | T | T | T |

Structure11

\*COHCOO\*

1.0000000000000000

|                     |                     |                    |
|---------------------|---------------------|--------------------|
| 14.7840003966999998 | 0.0000000000000000  | 0.0000000000000000 |
| -7.3920001983999999 | 12.8033199130999993 | 0.0000000000000000 |



0.0000000000000000 0.0000000000000000 26.7110004425000014  
 Cu N C O H  
 4 9 64 3 1

Selective dynamics

Direct

|                    |                    |                    |   |   |   |
|--------------------|--------------------|--------------------|---|---|---|
| 0.3883999883824316 | 0.6109899878387068 | 0.1237199976883616 | F | F | F |
| 0.4204736966994110 | 0.5679530334351377 | 0.2031313131018552 | T | T | T |
| 0.2636345458552100 | 0.5829557931111325 | 0.1922217715003129 | T | T | T |
| 0.4315400607218217 | 0.7331313909294259 | 0.1945862278575122 | T | T | T |
| 0.3273999989159151 | 0.6724299788206594 | 0.0770300030666817 | F | F | F |
| 0.3273600042078257 | 0.4895400106801233 | 0.0762199982880674 | F | F | F |
| 0.5102499723826810 | 0.6724500060481091 | 0.0761599987757577 | F | F | F |
| 0.9996700287274507 | 0.0001800000324650 | 0.0573600009216477 | F | F | F |
| 0.0003299999634265 | 0.3344300090962307 | 0.0625099986649431 | F | F | F |
| 0.9996899962509573 | 0.6666100025562471 | 0.0586999989901287 | F | F | F |
| 0.3332400024166660 | 0.0001599999854633 | 0.0586900003380535 | F | F | F |
| 0.6654199958038518 | 0.9995099902101501 | 0.0625599995251847 | F | F | F |
| 0.6666899919723832 | 0.3331600129459886 | 0.0612300001087860 | F | F | F |
| 0.3321700096157301 | 0.3312500119332853 | 0.0634699985367249 | F | F | F |
| 0.6686199903697627 | 0.6676899790852886 | 0.0635500028781806 | F | F | F |
| 0.9991999865008054 | 0.1663299948336885 | 0.0593199990547291 | F | F | F |
| 0.0001500000141448 | 0.5002700090658863 | 0.0620899982600847 | F | F | F |
| 0.9999099969734431 | 0.8333100080615523 | 0.0571499988286135 | F | F | F |
| 0.3328500091896487 | 0.1653199940614059 | 0.0589599981996258 | F | F | F |
| 0.3319799900125986 | 0.8348799943726348 | 0.0628399997826108 | F | F | F |
| 0.6658499836809995 | 0.1663399934903538 | 0.0614599995434091 | F | F | F |
| 0.6657000184196491 | 0.4994199871907909 | 0.0623999982923920 | F | F | F |
| 0.6680499911019240 | 0.8350800275685089 | 0.0631899982792987 | F | F | F |
| 0.1665399968694743 | 0.9999399781380731 | 0.0571300014870246 | F | F | F |
| 0.1647700071264779 | 0.3318099975501880 | 0.0630899965588227 | F | F | F |
| 0.1649599969669993 | 0.6678699851318157 | 0.0628300011305356 | F | F | F |
| 0.4995799959066858 | 0.9996899962566772 | 0.0621200017787373 | F | F | F |
| 0.5004400015054742 | 0.3341600000654878 | 0.0623699985549493 | F | F | F |
| 0.8335300087518434 | 0.0006599999888621 | 0.0593699999149706 | F | F | F |
| 0.8335000276869380 | 0.3339900076717370 | 0.0614399984580416 | F | F | F |
| 0.8345299959310495 | 0.6670100092759697 | 0.0590099990224289 | F | F | F |
| 0.1655199974769772 | 0.1649699956211279 | 0.0588000007106046 | F | F | F |
| 0.1689099967855014 | 0.5010300278786701 | 0.0695900022914344 | F | F | F |
| 0.1661600023717327 | 0.8336899876319350 | 0.0583200007559981 | F | F | F |
| 0.5000299811505329 | 0.1666100025210966 | 0.0600900016626156 | F | F | F |
| 0.4982599914069894 | 0.5016000270702463 | 0.0694800019188762 | F | F | F |
| 0.4988099932978187 | 0.8309299945801385 | 0.0696299970120435 | F | F | F |
| 0.8332399726153312 | 0.1666100025210966 | 0.0610099993636766 | F | F | F |
| 0.8332399726178181 | 0.4998199939886163 | 0.0600900016626156 | F | F | F |

|                    |                    |                    |   |   |   |
|--------------------|--------------------|--------------------|---|---|---|
| 0.8348900079967692 | 0.8343399763111563 | 0.0588699989124351 | F | F | F |
| 0.0547900013529556 | 0.1105799972670667 | 0.0582499988478276 | F | F | F |
| 0.0574500001527696 | 0.4450300037547379 | 0.0647099986659398 | F | F | F |
| 0.0552599988734528 | 0.7778099775364282 | 0.0577500015516321 | F | F | F |
| 0.3890799879994375 | 0.1110199987696632 | 0.0590200014557141 | F | F | F |
| 0.3847500086142546 | 0.4413599968097515 | 0.0698899999278808 | F | F | F |
| 0.3856300115637481 | 0.7774099707386029 | 0.0697999968969185 | F | F | F |
| 0.7216899990961423 | 0.1110199987696632 | 0.0616299994282770 | F | F | F |
| 0.7213600277433585 | 0.4436900019336107 | 0.0609799995887954 | F | F | F |
| 0.7239000201781849 | 0.7793800235195363 | 0.0617300011113215 | F | F | F |
| 0.0548500008969128 | 0.2779600024177142 | 0.0611100010467140 | F | F | F |
| 0.0548699982635696 | 0.6113299727824142 | 0.0609100013869721 | F | F | F |
| 0.0557399988174794 | 0.9441199898966843 | 0.0569700002542319 | F | F | F |
| 0.3894000053534441 | 0.2770200073944125 | 0.0612200014192723 | F | F | F |
| 0.3885200023536157 | 0.9449700116936768 | 0.0609200000764787 | F | F | F |
| 0.7219600081768291 | 0.2778800130081720 | 0.0612899996210956 | F | F | F |
| 0.7228400111134903 | 0.6104599833518947 | 0.0612800009690204 | F | F | F |
| 0.7218999862732431 | 0.9449999928237744 | 0.0611900016818296 | F | F | F |
| 0.2224700004002287 | 0.1112700029890163 | 0.0579399988155274 | F | F | F |
| 0.2239000052058842 | 0.4420799910817479 | 0.0698800012383671 | F | F | F |
| 0.2217099964610867 | 0.7781400084212819 | 0.0611599981631770 | F | F | F |
| 0.5554500222519394 | 0.1106600016727199 | 0.0609599985034350 | F | F | F |
| 0.5538799763018645 | 0.4459800124308089 | 0.0648500025197052 | F | F | F |
| 0.5577600002220393 | 0.7759199738370555 | 0.0699200034090950 | F | F | F |
| 0.8886299729346163 | 0.1112200022076308 | 0.0597000010326383 | F | F | F |
| 0.8891900181671417 | 0.4444000124669500 | 0.0609400011618462 | F | F | F |
| 0.8885800242332564 | 0.7773900031831715 | 0.0579899996383304 | F | F | F |
| 0.2204699963058161 | 0.2759700119173587 | 0.0616400018241308 | F | F | F |
| 0.2224200070404621 | 0.6142200231952089 | 0.0697799995553297 | F | F | F |
| 0.2220399975825629 | 0.9445899725293785 | 0.0577399991557783 | F | F | F |
| 0.5561599731237834 | 0.2784900069045193 | 0.0609700009367202 | F | F | F |
| 0.5584899783382440 | 0.6151199936777303 | 0.0699099972694697 | F | F | F |
| 0.5548200011515050 | 0.9423800111137410 | 0.0647599995261743 | F | F | F |
| 0.8888199925564066 | 0.2781499922028985 | 0.0615999996534029 | F | F | F |
| 0.8888300061197185 | 0.6107800006620749 | 0.0590399987973029 | F | F | F |
| 0.8892800212255736 | 0.9450600147559953 | 0.0582900010185554 | F | F | F |
| 0.2816380039418779 | 0.7815363502306251 | 0.2251629753663784 | T | T | T |
| 0.2065539088655358 | 0.6630256223464523 | 0.2155029501412639 | T | T | T |
| 0.2354565328556875 | 0.8293529011565257 | 0.2387776523933187 | T | T | T |
| 0.3808146869931752 | 0.8216524372790116 | 0.2186552762685050 | T | T | T |
| 0.1115669718157311 | 0.6441349374831299 | 0.2235740199999607 | T | T | T |
| 0.1261524862456659 | 0.7187217733602632 | 0.2340913502465348 | T | T | T |

Structure12

\*COCOHO

1.0000000000000000

|                     |                     |                     |
|---------------------|---------------------|---------------------|
| 14.7840003966999998 | 0.0000000000000000  | 0.0000000000000000  |
| -7.3920001983999999 | 12.8033199130999993 | 0.0000000000000000  |
| 0.0000000000000000  | 0.0000000000000000  | 26.7110004425000014 |

|    |   |    |   |   |
|----|---|----|---|---|
| Cu | N | C  | O | H |
| 4  | 9 | 64 | 3 | 1 |

Selective dynamics

Direct

|                    |                    |                    |   |   |   |
|--------------------|--------------------|--------------------|---|---|---|
| 0.3883999883824316 | 0.6109899878387068 | 0.1237199976883616 | F | F | F |
| 0.4126199972623939 | 0.5592125754825639 | 0.2026376551529347 | T | T | T |
| 0.2597880995553786 | 0.5848804217130356 | 0.1910270942122813 | T | T | T |
| 0.4332180547806771 | 0.7280627165179313 | 0.1945831683595277 | T | T | T |
| 0.3273999989159151 | 0.6724299788206594 | 0.0770300030666817 | F | F | F |
| 0.3273600042078257 | 0.4895400106801233 | 0.0762199982880674 | F | F | F |
| 0.5102499723826810 | 0.6724500060481091 | 0.0761599987757577 | F | F | F |
| 0.9996700287274507 | 0.0001800000324650 | 0.0573600009216477 | F | F | F |
| 0.0003299999634265 | 0.3344300090962307 | 0.0625099986649431 | F | F | F |
| 0.9996899962509573 | 0.6666100025562471 | 0.0586999989901287 | F | F | F |
| 0.3332400024166660 | 0.0001599999854633 | 0.0586900003380535 | F | F | F |
| 0.6654199958038518 | 0.9995099902101501 | 0.0625599995251847 | F | F | F |
| 0.6666899919723832 | 0.3331600129459886 | 0.0612300001087860 | F | F | F |
| 0.3321700096157301 | 0.3312500119332853 | 0.0634699985367249 | F | F | F |
| 0.6686199903697627 | 0.6676899790852886 | 0.0635500028781806 | F | F | F |
| 0.9991999865008054 | 0.1663299948336885 | 0.0593199990547291 | F | F | F |
| 0.0001500000141448 | 0.5002700090658863 | 0.0620899982600847 | F | F | F |
| 0.9999099969734431 | 0.8333100080615523 | 0.0571499988286135 | F | F | F |
| 0.3328500091896487 | 0.1653199940614059 | 0.0589599981996258 | F | F | F |
| 0.3319799900125986 | 0.8348799943726348 | 0.0628399997826108 | F | F | F |
| 0.6658499836809995 | 0.1663399934903538 | 0.0614599995434091 | F | F | F |
| 0.6657000184196491 | 0.4994199871907909 | 0.0623999982923920 | F | F | F |
| 0.6680499911019240 | 0.8350800275685089 | 0.0631899982792987 | F | F | F |
| 0.1665399968694743 | 0.9999399781380731 | 0.0571300014870246 | F | F | F |
| 0.1647700071264779 | 0.3318099975501880 | 0.0630899965588227 | F | F | F |
| 0.1649599969669993 | 0.6678699851318157 | 0.0628300011305356 | F | F | F |
| 0.4995799959066858 | 0.9996899962566772 | 0.0621200017787373 | F | F | F |
| 0.5004400015054742 | 0.3341600000654878 | 0.0623699985549493 | F | F | F |
| 0.8335300087518434 | 0.0006599999888621 | 0.0593699999149706 | F | F | F |
| 0.8335000276869380 | 0.3339900076717370 | 0.0614399984580416 | F | F | F |
| 0.8345299959310495 | 0.6670100092759697 | 0.0590099990224289 | F | F | F |
| 0.1655199974769772 | 0.1649699956211279 | 0.0588000007106046 | F | F | F |
| 0.1689099967855014 | 0.5010300278786701 | 0.0695900022914344 | F | F | F |
| 0.1661600023717327 | 0.8336899876319350 | 0.0583200007559981 | F | F | F |
| 0.5000299811505329 | 0.1666100025210966 | 0.0600900016626156 | F | F | F |

|                    |                    |                    |   |   |   |
|--------------------|--------------------|--------------------|---|---|---|
| 0.4982599914069894 | 0.5016000270702463 | 0.0694800019188762 | F | F | F |
| 0.4988099932978187 | 0.8309299945801385 | 0.0696299970120435 | F | F | F |
| 0.8332399726153312 | 0.1666100025210966 | 0.0610099993636766 | F | F | F |
| 0.8332399726178181 | 0.4998199939886163 | 0.0600900016626156 | F | F | F |
| 0.8348900079967692 | 0.8343399763111563 | 0.0588699989124351 | F | F | F |
| 0.0547900013529556 | 0.1105799972670667 | 0.0582499988478276 | F | F | F |
| 0.0574500001527696 | 0.4450300037547379 | 0.0647099986659398 | F | F | F |
| 0.0552599988734528 | 0.7778099775364282 | 0.0577500015516321 | F | F | F |
| 0.3890799879994375 | 0.1110199987696632 | 0.0590200014557141 | F | F | F |
| 0.3847500086142546 | 0.4413599968097515 | 0.0698899999278808 | F | F | F |
| 0.3856300115637481 | 0.7774099707386029 | 0.0697999968969185 | F | F | F |
| 0.7216899990961423 | 0.1110199987696632 | 0.0616299994282770 | F | F | F |
| 0.7213600277433585 | 0.4436900019336107 | 0.0609799995887954 | F | F | F |
| 0.7239000201781849 | 0.7793800235195363 | 0.0617300011113215 | F | F | F |
| 0.0548500008969128 | 0.2779600024177142 | 0.0611100010467140 | F | F | F |
| 0.0548699982635696 | 0.6113299727824142 | 0.0609100013869721 | F | F | F |
| 0.0557399988174794 | 0.9441199898966843 | 0.0569700002542319 | F | F | F |
| 0.3894000053534441 | 0.2770200073944125 | 0.0612200014192723 | F | F | F |
| 0.3885200023536157 | 0.9449700116936768 | 0.0609200000764787 | F | F | F |
| 0.7219600081768291 | 0.2778800130081720 | 0.0612899996210956 | F | F | F |
| 0.7228400111134903 | 0.6104599833518947 | 0.0612800009690204 | F | F | F |
| 0.7218999862732431 | 0.9449999928237744 | 0.0611900016818296 | F | F | F |
| 0.2224700004002287 | 0.1112700029890163 | 0.0579399988155274 | F | F | F |
| 0.2239000052058842 | 0.4420799910817479 | 0.0698800012383671 | F | F | F |
| 0.2217099964610867 | 0.7781400084212819 | 0.0611599981631770 | F | F | F |
| 0.5554500222519394 | 0.1106600016727199 | 0.0609599985034350 | F | F | F |
| 0.5538799763018645 | 0.4459800124308089 | 0.0648500025197052 | F | F | F |
| 0.5577600002220393 | 0.7759199738370555 | 0.0699200034090950 | F | F | F |
| 0.8886299729346163 | 0.1112200022076308 | 0.0597000010326383 | F | F | F |
| 0.8891900181671417 | 0.4444000124669500 | 0.0609400011618462 | F | F | F |
| 0.8885800242332564 | 0.7773900031831715 | 0.0579899996383304 | F | F | F |
| 0.2204699963058161 | 0.2759700119173587 | 0.0616400018241308 | F | F | F |
| 0.2224200070404621 | 0.6142200231952089 | 0.0697799995553297 | F | F | F |
| 0.2220399975825629 | 0.9445899725293785 | 0.0577399991557783 | F | F | F |
| 0.5561599731237834 | 0.2784900069045193 | 0.0609700009367202 | F | F | F |
| 0.5584899783382440 | 0.6151199936777303 | 0.0699099972694697 | F | F | F |
| 0.5548200011515050 | 0.9423800111137410 | 0.0647599995261743 | F | F | F |
| 0.8888199925564066 | 0.2781499922028985 | 0.0615999996534029 | F | F | F |
| 0.8888300061197185 | 0.6107800006620749 | 0.0590399987973029 | F | F | F |
| 0.8892800212255736 | 0.9450600147559953 | 0.0582900010185554 | F | F | F |
| 0.2861438311606033 | 0.7714062168968034 | 0.2370498220146014 | T | T | T |
| 0.2027733765453200 | 0.6723670393544449 | 0.2086052453029074 | T | T | T |
| 0.2486578073116314 | 0.8110067267272791 | 0.2707239459616942 | T | T | T |
| 0.3829732275606950 | 0.8092601807723976 | 0.2324677009573241 | T | T | T |

|                    |                    |                    |   |   |   |
|--------------------|--------------------|--------------------|---|---|---|
| 0.1224676888295708 | 0.6711209135208834 | 0.1953776876255221 | T | T | T |
| 0.3083313457472615 | 0.8679201958963533 | 0.2883853149035581 | T | T | T |

Structure13

\*COCOOH

1.0000000000000000

|                     |                    |                    |
|---------------------|--------------------|--------------------|
| 14.7840003966999998 | 0.0000000000000000 | 0.0000000000000000 |
|---------------------|--------------------|--------------------|

|                     |                     |                    |
|---------------------|---------------------|--------------------|
| -7.3920001983999999 | 12.8033199130999993 | 0.0000000000000000 |
|---------------------|---------------------|--------------------|

|                    |                    |                     |
|--------------------|--------------------|---------------------|
| 0.0000000000000000 | 0.0000000000000000 | 26.7110004425000014 |
|--------------------|--------------------|---------------------|

|    |   |   |   |   |
|----|---|---|---|---|
| Cu | N | C | O | H |
|----|---|---|---|---|

|   |   |    |   |   |
|---|---|----|---|---|
| 4 | 9 | 64 | 3 | 1 |
|---|---|----|---|---|

Selective dynamics

Direct

|                    |                    |                    |   |   |   |
|--------------------|--------------------|--------------------|---|---|---|
| 0.3883999883824316 | 0.6109899878387068 | 0.1237199976883616 | F | F | F |
| 0.4162393589662553 | 0.5632326013668113 | 0.2030612534740958 | T | T | T |
| 0.2650059794534455 | 0.5903936838896142 | 0.1927366627570806 | T | T | T |
| 0.4393128249826702 | 0.7321992286947659 | 0.1925677683725277 | T | T | T |
| 0.3273999989159151 | 0.6724299788206594 | 0.0770300030666817 | F | F | F |
| 0.3273600042078257 | 0.4895400106801233 | 0.0762199982880674 | F | F | F |
| 0.5102499723826810 | 0.6724500060481091 | 0.0761599987757577 | F | F | F |
| 0.9996700287274507 | 0.0001800000324650 | 0.0573600009216477 | F | F | F |
| 0.0003299999634265 | 0.3344300090962307 | 0.0625099986649431 | F | F | F |
| 0.9996899962509573 | 0.6666100025562471 | 0.0586999989901287 | F | F | F |
| 0.3332400024166660 | 0.0001599999854633 | 0.0586900003380535 | F | F | F |
| 0.6654199958038518 | 0.9995099902101501 | 0.0625599995251847 | F | F | F |
| 0.6666899919723832 | 0.3331600129459886 | 0.0612300001087860 | F | F | F |
| 0.3321700096157301 | 0.3312500119332853 | 0.0634699985367249 | F | F | F |
| 0.6686199903697627 | 0.6676899790852886 | 0.0635500028781806 | F | F | F |
| 0.9991999865008054 | 0.1663299948336885 | 0.0593199990547291 | F | F | F |
| 0.0001500000141448 | 0.5002700090658863 | 0.0620899982600847 | F | F | F |
| 0.9999099969734431 | 0.8333100080615523 | 0.0571499988286135 | F | F | F |
| 0.3328500091896487 | 0.1653199940614059 | 0.0589599981996258 | F | F | F |
| 0.3319799900125986 | 0.8348799943726348 | 0.0628399997826108 | F | F | F |
| 0.6658499836809995 | 0.1663399934903538 | 0.0614599995434091 | F | F | F |
| 0.6657000184196491 | 0.4994199871907909 | 0.0623999982923920 | F | F | F |
| 0.6680499911019240 | 0.8350800275685089 | 0.0631899982792987 | F | F | F |
| 0.1665399968694743 | 0.9999399781380731 | 0.0571300014870246 | F | F | F |
| 0.1647700071264779 | 0.3318099975501880 | 0.0630899965588227 | F | F | F |
| 0.1649599969669993 | 0.6678699851318157 | 0.0628300011305356 | F | F | F |
| 0.4995799959066858 | 0.9996899962566772 | 0.0621200017787373 | F | F | F |
| 0.5004400015054742 | 0.3341600000654878 | 0.0623699985549493 | F | F | F |
| 0.8335300087518434 | 0.0006599999888621 | 0.0593699999149706 | F | F | F |
| 0.8335000276869380 | 0.3339900076717370 | 0.0614399984580416 | F | F | F |
| 0.8345299959310495 | 0.6670100092759697 | 0.0590099990224289 | F | F | F |

|                    |                    |                    |   |   |   |
|--------------------|--------------------|--------------------|---|---|---|
| 0.1655199974769772 | 0.1649699956211279 | 0.0588000007106046 | F | F | F |
| 0.1689099967855014 | 0.5010300278786701 | 0.0695900022914344 | F | F | F |
| 0.1661600023717327 | 0.8336899876319350 | 0.0583200007559981 | F | F | F |
| 0.5000299811505329 | 0.1666100025210966 | 0.0600900016626156 | F | F | F |
| 0.4982599914069894 | 0.5016000270702463 | 0.0694800019188762 | F | F | F |
| 0.4988099932978187 | 0.8309299945801385 | 0.0696299970120435 | F | F | F |
| 0.8332399726153312 | 0.1666100025210966 | 0.0610099993636766 | F | F | F |
| 0.8332399726178181 | 0.4998199939886163 | 0.0600900016626156 | F | F | F |
| 0.8348900079967692 | 0.8343399763111563 | 0.0588699989124351 | F | F | F |
| 0.0547900013529556 | 0.1105799972670667 | 0.0582499988478276 | F | F | F |
| 0.0574500001527696 | 0.4450300037547379 | 0.0647099986659398 | F | F | F |
| 0.0552599988734528 | 0.7778099775364282 | 0.0577500015516321 | F | F | F |
| 0.3890799879994375 | 0.1110199987696632 | 0.0590200014557141 | F | F | F |
| 0.3847500086142546 | 0.4413599968097515 | 0.0698899999278808 | F | F | F |
| 0.3856300115637481 | 0.7774099707386029 | 0.0697999968969185 | F | F | F |
| 0.7216899990961423 | 0.1110199987696632 | 0.0616299994282770 | F | F | F |
| 0.7213600277433585 | 0.4436900019336107 | 0.0609799995887954 | F | F | F |
| 0.7239000201781849 | 0.7793800235195363 | 0.0617300011113215 | F | F | F |
| 0.0548500008969128 | 0.2779600024177142 | 0.0611100010467140 | F | F | F |
| 0.0548699982635696 | 0.6113299727824142 | 0.0609100013869721 | F | F | F |
| 0.0557399988174794 | 0.9441199898966843 | 0.0569700002542319 | F | F | F |
| 0.3894000053534441 | 0.2770200073944125 | 0.0612200014192723 | F | F | F |
| 0.3885200023536157 | 0.9449700116936768 | 0.0609200000764787 | F | F | F |
| 0.7219600081768291 | 0.2778800130081720 | 0.0612899996210956 | F | F | F |
| 0.7228400111134903 | 0.6104599833518947 | 0.0612800009690204 | F | F | F |
| 0.7218999862732431 | 0.9449999928237744 | 0.0611900016818296 | F | F | F |
| 0.2224700004002287 | 0.1112700029890163 | 0.0579399988155274 | F | F | F |
| 0.2239000052058842 | 0.4420799910817479 | 0.0698800012383671 | F | F | F |
| 0.2217099964610867 | 0.7781400084212819 | 0.0611599981631770 | F | F | F |
| 0.5554500222519394 | 0.1106600016727199 | 0.0609599985034350 | F | F | F |
| 0.5538799763018645 | 0.4459800124308089 | 0.0648500025197052 | F | F | F |
| 0.5577600002220393 | 0.7759199738370555 | 0.0699200034090950 | F | F | F |
| 0.8886299729346163 | 0.1112200022076308 | 0.0597000010326383 | F | F | F |
| 0.8891900181671417 | 0.4444000124669500 | 0.0609400011618462 | F | F | F |
| 0.8885800242332564 | 0.7773900031831715 | 0.0579899996383304 | F | F | F |
| 0.2204699963058161 | 0.2759700119173587 | 0.0616400018241308 | F | F | F |
| 0.2224200070404621 | 0.6142200231952089 | 0.0697799995553297 | F | F | F |
| 0.2220399975825629 | 0.9445899725293785 | 0.0577399991557783 | F | F | F |
| 0.5561599731237834 | 0.2784900069045193 | 0.0609700009367202 | F | F | F |
| 0.5584899783382440 | 0.6151199936777303 | 0.0699099972694697 | F | F | F |
| 0.5548200011515050 | 0.9423800111137410 | 0.0647599995261743 | F | F | F |
| 0.8888199925564066 | 0.2781499922028985 | 0.0615999996534029 | F | F | F |
| 0.8888300061197185 | 0.6107800006620749 | 0.0590399987973029 | F | F | F |
| 0.8892800212255736 | 0.9450600147559953 | 0.0582900010185554 | F | F | F |

|                    |                    |                    |   |   |   |
|--------------------|--------------------|--------------------|---|---|---|
| 0.2808773090631205 | 0.7737227908911352 | 0.2425494168816579 | T | T | T |
| 0.2091840677270808 | 0.6800043613491740 | 0.2075332571658837 | T | T | T |
| 0.2566053590651750 | 0.8032859014481250 | 0.2795801013490002 | T | T | T |
| 0.3895189878346493 | 0.8197014573023867 | 0.2297658488278936 | T | T | T |
| 0.1337200984988373 | 0.6813480847201360 | 0.1891545130440186 | T | T | T |
| 0.4284238860377658 | 0.8731379594045968 | 0.2553146163163129 | T | T | T |

### Structure14

\*CHOHCOO\*

1.0000000000000000

|                     |                     |                     |
|---------------------|---------------------|---------------------|
| 14.7840003966999998 | 0.0000000000000000  | 0.0000000000000000  |
| -7.3920001983999999 | 12.8033199130999993 | 0.0000000000000000  |
| 0.0000000000000000  | 0.0000000000000000  | 26.7110004425000014 |

|    |   |    |   |   |
|----|---|----|---|---|
| Cu | N | C  | O | H |
| 4  | 9 | 64 | 3 | 2 |

Selective dynamics

Direct

|                    |                    |                    |   |   |   |
|--------------------|--------------------|--------------------|---|---|---|
| 0.3883999883824316 | 0.6109899878387068 | 0.1237199976883616 | F | F | F |
| 0.4313832636682087 | 0.5791029104276514 | 0.2036382473701648 | T | T | T |
| 0.2672399390815201 | 0.5845367941147057 | 0.1947846264576560 | T | T | T |
| 0.4328578503446432 | 0.7379282379673767 | 0.1931359868788291 | T | T | T |
| 0.3273999989159151 | 0.6724299788206594 | 0.0770300030666817 | F | F | F |
| 0.3273600042078257 | 0.4895400106801233 | 0.0762199982880674 | F | F | F |
| 0.5102499723826810 | 0.6724500060481091 | 0.0761599987757577 | F | F | F |
| 0.9996700287274507 | 0.0001800000324650 | 0.0573600009216477 | F | F | F |
| 0.0003299999634265 | 0.3344300090962307 | 0.0625099986649431 | F | F | F |
| 0.9996899962509573 | 0.6666100025562471 | 0.0586999989901287 | F | F | F |
| 0.3332400024166660 | 0.0001599999854633 | 0.0586900003380535 | F | F | F |
| 0.6654199958038518 | 0.9995099902101501 | 0.0625599995251847 | F | F | F |
| 0.6666899919723832 | 0.3331600129459886 | 0.0612300001087860 | F | F | F |
| 0.3321700096157301 | 0.3312500119332853 | 0.0634699985367249 | F | F | F |
| 0.6686199903697627 | 0.6676899790852886 | 0.0635500028781806 | F | F | F |
| 0.9991999865008054 | 0.1663299948336885 | 0.0593199990547291 | F | F | F |
| 0.0001500000141448 | 0.5002700090658863 | 0.0620899982600847 | F | F | F |
| 0.9999099969734431 | 0.8333100080615523 | 0.0571499988286135 | F | F | F |
| 0.3328500091896487 | 0.1653199940614059 | 0.0589599981996258 | F | F | F |
| 0.3319799900125986 | 0.8348799943726348 | 0.0628399997826108 | F | F | F |
| 0.6658499836809995 | 0.1663399934903538 | 0.0614599995434091 | F | F | F |
| 0.6657000184196491 | 0.4994199871907909 | 0.0623999982923920 | F | F | F |
| 0.6680499911019240 | 0.8350800275685089 | 0.0631899982792987 | F | F | F |
| 0.1665399968694743 | 0.9999399781380731 | 0.0571300014870246 | F | F | F |
| 0.1647700071264779 | 0.3318099975501880 | 0.0630899965588227 | F | F | F |
| 0.1649599969669993 | 0.6678699851318157 | 0.0628300011305356 | F | F | F |
| 0.4995799959066858 | 0.9996899962566772 | 0.0621200017787373 | F | F | F |

|                    |                    |                    |   |   |   |
|--------------------|--------------------|--------------------|---|---|---|
| 0.5004400015054742 | 0.3341600000654878 | 0.0623699985549493 | F | F | F |
| 0.8335300087518434 | 0.0006599999888621 | 0.0593699999149706 | F | F | F |
| 0.8335000276869380 | 0.3339900076717370 | 0.0614399984580416 | F | F | F |
| 0.8345299959310495 | 0.6670100092759697 | 0.0590099990224289 | F | F | F |
| 0.1655199974769772 | 0.1649699956211279 | 0.0588000007106046 | F | F | F |
| 0.1689099967855014 | 0.5010300278786701 | 0.0695900022914344 | F | F | F |
| 0.1661600023717327 | 0.8336899876319350 | 0.0583200007559981 | F | F | F |
| 0.5000299811505329 | 0.1666100025210966 | 0.0600900016626156 | F | F | F |
| 0.4982599914069894 | 0.5016000270702463 | 0.0694800019188762 | F | F | F |
| 0.4988099932978187 | 0.8309299945801385 | 0.0696299970120435 | F | F | F |
| 0.8332399726153312 | 0.1666100025210966 | 0.0610099993636766 | F | F | F |
| 0.8332399726178181 | 0.4998199939886163 | 0.0600900016626156 | F | F | F |
| 0.8348900079967692 | 0.8343399763111563 | 0.0588699989124351 | F | F | F |
| 0.0547900013529556 | 0.1105799972670667 | 0.0582499988478276 | F | F | F |
| 0.0574500001527696 | 0.4450300037547379 | 0.0647099986659398 | F | F | F |
| 0.0552599988734528 | 0.7778099775364282 | 0.0577500015516321 | F | F | F |
| 0.3890799879994375 | 0.1110199987696632 | 0.0590200014557141 | F | F | F |
| 0.3847500086142546 | 0.4413599968097515 | 0.0698899999278808 | F | F | F |
| 0.3856300115637481 | 0.7774099707386029 | 0.0697999968969185 | F | F | F |
| 0.7216899990961423 | 0.1110199987696632 | 0.0616299994282770 | F | F | F |
| 0.7213600277433585 | 0.4436900019336107 | 0.0609799995887954 | F | F | F |
| 0.7239000201781849 | 0.7793800235195363 | 0.0617300011113215 | F | F | F |
| 0.0548500008969128 | 0.2779600024177142 | 0.0611100010467140 | F | F | F |
| 0.0548699982635696 | 0.6113299727824142 | 0.0609100013869721 | F | F | F |
| 0.0557399988174794 | 0.9441199898966843 | 0.0569700002542319 | F | F | F |
| 0.3894000053534441 | 0.2770200073944125 | 0.0612200014192723 | F | F | F |
| 0.3885200023536157 | 0.9449700116936768 | 0.0609200000764787 | F | F | F |
| 0.7219600081768291 | 0.2778800130081720 | 0.0612899996210956 | F | F | F |
| 0.7228400111134903 | 0.6104599833518947 | 0.0612800009690204 | F | F | F |
| 0.7218999862732431 | 0.9449999928237744 | 0.0611900016818296 | F | F | F |
| 0.2224700004002287 | 0.1112700029890163 | 0.0579399988155274 | F | F | F |
| 0.2239000052058842 | 0.4420799910817479 | 0.0698800012383671 | F | F | F |
| 0.2217099964610867 | 0.7781400084212819 | 0.0611599981631770 | F | F | F |
| 0.5554500222519394 | 0.1106600016727199 | 0.0609599985034350 | F | F | F |
| 0.5538799763018645 | 0.4459800124308089 | 0.0648500025197052 | F | F | F |
| 0.5577600002220393 | 0.7759199738370555 | 0.0699200034090950 | F | F | F |
| 0.8886299729346163 | 0.1112200022076308 | 0.0597000010326383 | F | F | F |
| 0.8891900181671417 | 0.4444000124669500 | 0.0609400011618462 | F | F | F |
| 0.8885800242332564 | 0.7773900031831715 | 0.0579899996383304 | F | F | F |
| 0.2204699963058161 | 0.2759700119173587 | 0.0616400018241308 | F | F | F |
| 0.2224200070404621 | 0.6142200231952089 | 0.0697799995553297 | F | F | F |
| 0.2220399975825629 | 0.9445899725293785 | 0.0577399991557783 | F | F | F |
| 0.5561599731237834 | 0.2784900069045193 | 0.0609700009367202 | F | F | F |
| 0.5584899783382440 | 0.6151199936777303 | 0.0699099972694697 | F | F | F |



|                    |                    |                    |   |   |   |
|--------------------|--------------------|--------------------|---|---|---|
| 0.5548200011515050 | 0.9423800111137410 | 0.0647599995261743 | F | F | F |
| 0.8888199925564066 | 0.2781499922028985 | 0.0615999996534029 | F | F | F |
| 0.8888300061197185 | 0.6107800006620749 | 0.0590399987973029 | F | F | F |
| 0.8892800212255736 | 0.9450600147559953 | 0.0582900010185554 | F | F | F |
| 0.2768505516032303 | 0.7807878065012037 | 0.1977267331098790 | T | T | T |
| 0.2137981923788400 | 0.6740084112870429 | 0.2217852423116719 | T | T | T |
| 0.2264574542819070 | 0.8171979771181866 | 0.1763449602033709 | T | T | T |
| 0.3794673573708650 | 0.8300325798138194 | 0.1997692630322097 | T | T | T |
| 0.1062354688802463 | 0.6384432099107685 | 0.2182658495487599 | T | T | T |
| 0.1065134228168126 | 0.6948405179252728 | 0.1977889799235633 | T | T | T |
| 0.2369512836210806 | 0.6738726843466452 | 0.2611634724987489 | T | T | T |

Structure15

CH<sub>2</sub>\*OCOO\*

1.0000000000000000

|                     |                     |                     |
|---------------------|---------------------|---------------------|
| 14.7840003966999998 | 0.0000000000000000  | 0.0000000000000000  |
| -7.3920001983999999 | 12.8033199130999993 | 0.0000000000000000  |
| 0.0000000000000000  | 0.0000000000000000  | 26.7110004425000014 |

|    |   |    |   |   |
|----|---|----|---|---|
| Cu | N | C  | O | H |
| 4  | 9 | 64 | 3 | 2 |

Selective dynamics

Direct

|                    |                    |                    |   |   |   |
|--------------------|--------------------|--------------------|---|---|---|
| 0.3883999883824316 | 0.6109899878387068 | 0.1237199976883616 | F | F | F |
| 0.4229387523293178 | 0.5854622498906062 | 0.2070219355255214 | T | T | T |
| 0.2622827022516943 | 0.5812572770131941 | 0.1917852600632311 | T | T | T |
| 0.4184444093353271 | 0.7413860593608687 | 0.1894184855933912 | T | T | T |
| 0.3273999989159151 | 0.6724299788206594 | 0.0770300030666817 | F | F | F |
| 0.3273600042078257 | 0.4895400106801233 | 0.0762199982880674 | F | F | F |
| 0.5102499723826810 | 0.6724500060481091 | 0.0761599987757577 | F | F | F |
| 0.9996700287274507 | 0.0001800000324650 | 0.0573600009216477 | F | F | F |
| 0.0003299999634265 | 0.3344300090962307 | 0.0625099986649431 | F | F | F |
| 0.9996899962509573 | 0.6666100025562471 | 0.0586999989901287 | F | F | F |
| 0.3332400024166660 | 0.0001599999854633 | 0.0586900003380535 | F | F | F |
| 0.6654199958038518 | 0.9995099902101501 | 0.0625599995251847 | F | F | F |
| 0.6666899919723832 | 0.3331600129459886 | 0.0612300001087860 | F | F | F |
| 0.3321700096157301 | 0.3312500119332853 | 0.0634699985367249 | F | F | F |
| 0.6686199903697627 | 0.6676899790852886 | 0.0635500028781806 | F | F | F |
| 0.9991999865008054 | 0.1663299948336885 | 0.0593199990547291 | F | F | F |
| 0.0001500000141448 | 0.5002700090658863 | 0.0620899982600847 | F | F | F |
| 0.9999099969734431 | 0.8333100080615523 | 0.0571499988286135 | F | F | F |
| 0.3328500091896487 | 0.1653199940614059 | 0.0589599981996258 | F | F | F |
| 0.3319799900125986 | 0.8348799943726348 | 0.0628399997826108 | F | F | F |
| 0.6658499836809995 | 0.1663399934903538 | 0.0614599995434091 | F | F | F |
| 0.6657000184196491 | 0.4994199871907909 | 0.0623999982923920 | F | F | F |

|                    |                    |                    |   |   |   |
|--------------------|--------------------|--------------------|---|---|---|
| 0.6680499911019240 | 0.8350800275685089 | 0.0631899982792987 | F | F | F |
| 0.1665399968694743 | 0.9999399781380731 | 0.0571300014870246 | F | F | F |
| 0.1647700071264779 | 0.3318099975501880 | 0.0630899965588227 | F | F | F |
| 0.1649599969669993 | 0.6678699851318157 | 0.0628300011305356 | F | F | F |
| 0.4995799959066858 | 0.9996899962566772 | 0.0621200017787373 | F | F | F |
| 0.5004400015054742 | 0.3341600000654878 | 0.0623699985549493 | F | F | F |
| 0.8335300087518434 | 0.0006599999888621 | 0.0593699999149706 | F | F | F |
| 0.8335000276869380 | 0.3339900076717370 | 0.0614399984580416 | F | F | F |
| 0.8345299959310495 | 0.6670100092759697 | 0.0590099990224289 | F | F | F |
| 0.1655199974769772 | 0.1649699956211279 | 0.0588000007106046 | F | F | F |
| 0.1689099967855014 | 0.5010300278786701 | 0.0695900022914344 | F | F | F |
| 0.1661600023717327 | 0.8336899876319350 | 0.0583200007559981 | F | F | F |
| 0.5000299811505329 | 0.1666100025210966 | 0.0600900016626156 | F | F | F |
| 0.4982599914069894 | 0.5016000270702463 | 0.0694800019188762 | F | F | F |
| 0.4988099932978187 | 0.8309299945801385 | 0.0696299970120435 | F | F | F |
| 0.8332399726153312 | 0.1666100025210966 | 0.0610099993636766 | F | F | F |
| 0.8332399726178181 | 0.4998199939886163 | 0.0600900016626156 | F | F | F |
| 0.8348900079967692 | 0.8343399763111563 | 0.0588699989124351 | F | F | F |
| 0.0547900013529556 | 0.1105799972670667 | 0.0582499988478276 | F | F | F |
| 0.0574500001527696 | 0.4450300037547379 | 0.0647099986659398 | F | F | F |
| 0.0552599988734528 | 0.7778099775364282 | 0.0577500015516321 | F | F | F |
| 0.3890799879994375 | 0.1110199987696632 | 0.0590200014557141 | F | F | F |
| 0.3847500086142546 | 0.4413599968097515 | 0.0698899999278808 | F | F | F |
| 0.3856300115637481 | 0.7774099707386029 | 0.0697999968969185 | F | F | F |
| 0.7216899990961423 | 0.1110199987696632 | 0.0616299994282770 | F | F | F |
| 0.7213600277433585 | 0.4436900019336107 | 0.0609799995887954 | F | F | F |
| 0.7239000201781849 | 0.7793800235195363 | 0.0617300011113215 | F | F | F |
| 0.0548500008969128 | 0.2779600024177142 | 0.0611100010467140 | F | F | F |
| 0.0548699982635696 | 0.6113299727824142 | 0.0609100013869721 | F | F | F |
| 0.0557399988174794 | 0.9441199898966843 | 0.0569700002542319 | F | F | F |
| 0.3894000053534441 | 0.2770200073944125 | 0.0612200014192723 | F | F | F |
| 0.3885200023536157 | 0.9449700116936768 | 0.0609200000764787 | F | F | F |
| 0.7219600081768291 | 0.2778800130081720 | 0.0612899996210956 | F | F | F |
| 0.7228400111134903 | 0.6104599833518947 | 0.0612800009690204 | F | F | F |
| 0.7218999862732431 | 0.9449999928237744 | 0.0611900016818296 | F | F | F |
| 0.2224700004002287 | 0.1112700029890163 | 0.0579399988155274 | F | F | F |
| 0.2239000052058842 | 0.4420799910817479 | 0.0698800012383671 | F | F | F |
| 0.2217099964610867 | 0.7781400084212819 | 0.0611599981631770 | F | F | F |
| 0.5554500222519394 | 0.1106600016727199 | 0.0609599985034350 | F | F | F |
| 0.5538799763018645 | 0.4459800124308089 | 0.0648500025197052 | F | F | F |
| 0.5577600002220393 | 0.7759199738370555 | 0.0699200034090950 | F | F | F |
| 0.8886299729346163 | 0.1112200022076308 | 0.0597000010326383 | F | F | F |
| 0.8891900181671417 | 0.4444000124669500 | 0.0609400011618462 | F | F | F |
| 0.8885800242332564 | 0.7773900031831715 | 0.0579899996383304 | F | F | F |

|                    |                    |                    |   |   |   |
|--------------------|--------------------|--------------------|---|---|---|
| 0.2204699963058161 | 0.2759700119173587 | 0.0616400018241308 | F | F | F |
| 0.2224200070404621 | 0.6142200231952089 | 0.0697799995553297 | F | F | F |
| 0.2220399975825629 | 0.9445899725293785 | 0.0577399991557783 | F | F | F |
| 0.5561599731237834 | 0.2784900069045193 | 0.0609700009367202 | F | F | F |
| 0.5584899783382440 | 0.6151199936777303 | 0.0699099972694697 | F | F | F |
| 0.5548200011515050 | 0.9423800111137410 | 0.0647599995261743 | F | F | F |
| 0.8888199925564066 | 0.2781499922028985 | 0.0615999996534029 | F | F | F |
| 0.8888300061197185 | 0.6107800006620749 | 0.0590399987973029 | F | F | F |
| 0.8892800212255736 | 0.9450600147559953 | 0.0582900010185554 | F | F | F |
| 0.2817712143122613 | 0.8232086155241342 | 0.1899023912309786 | T | T | T |
| 0.2007778277004517 | 0.7257946561192820 | 0.2199912111353869 | T | T | T |
| 0.2533331268779675 | 0.8808912093611577 | 0.1698352981809542 | T | T | T |
| 0.3792704623837135 | 0.8435805285489693 | 0.1871382001554255 | T | T | T |
| 0.1685205397904952 | 0.6274629949933876 | 0.1974640257871457 | T | T | T |
| 0.2342555293941580 | 0.7319081921048173 | 0.2579086525520871 | T | T | T |
| 0.1313496189531879 | 0.7348393889612784 | 0.2238672976006353 | T | T | T |

Structure16

\*CHOCOHO

1.0000000000000000

14.7840003966999998 0.0000000000000000 0.0000000000000000

-7.3920001983999999 12.8033199130999993 0.0000000000000000

0.0000000000000000 0.0000000000000000 26.7110004425000014

Cu N C O H  
4 9 64 3 2

Selective dynamics

Direct

|                    |                    |                    |   |   |   |
|--------------------|--------------------|--------------------|---|---|---|
| 0.3883999883824316 | 0.6109899878387068 | 0.1237199976883616 | F | F | F |
| 0.4142669909469692 | 0.5483810163269539 | 0.1998490608382886 | T | T | T |
| 0.2582507775555905 | 0.5673642517501406 | 0.1890662960072681 | T | T | T |
| 0.4273802807462409 | 0.7124251534716194 | 0.2029302347526487 | T | T | T |
| 0.3273999989159151 | 0.6724299788206594 | 0.0770300030666817 | F | F | F |
| 0.3273600042078257 | 0.4895400106801233 | 0.0762199982880674 | F | F | F |
| 0.5102499723826810 | 0.6724500060481091 | 0.0761599987757577 | F | F | F |
| 0.9996700287274507 | 0.0001800000324650 | 0.0573600009216477 | F | F | F |
| 0.0003299999634265 | 0.3344300090962307 | 0.0625099986649431 | F | F | F |
| 0.9996899962509573 | 0.6666100025562471 | 0.0586999989901287 | F | F | F |
| 0.3332400024166660 | 0.0001599999854633 | 0.0586900003380535 | F | F | F |
| 0.6654199958038518 | 0.9995099902101501 | 0.0625599995251847 | F | F | F |
| 0.6666899919723832 | 0.3331600129459886 | 0.0612300001087860 | F | F | F |
| 0.3321700096157301 | 0.3312500119332853 | 0.0634699985367249 | F | F | F |
| 0.6686199903697627 | 0.6676899790852886 | 0.0635500028781806 | F | F | F |
| 0.9991999865008054 | 0.1663299948336885 | 0.0593199990547291 | F | F | F |
| 0.0001500000141448 | 0.5002700090658863 | 0.0620899982600847 | F | F | F |

|                    |                    |                    |   |   |   |
|--------------------|--------------------|--------------------|---|---|---|
| 0.9999099969734431 | 0.8333100080615523 | 0.0571499988286135 | F | F | F |
| 0.3328500091896487 | 0.1653199940614059 | 0.0589599981996258 | F | F | F |
| 0.3319799900125986 | 0.8348799943726348 | 0.0628399997826108 | F | F | F |
| 0.6658499836809995 | 0.1663399934903538 | 0.0614599995434091 | F | F | F |
| 0.6657000184196491 | 0.4994199871907909 | 0.0623999982923920 | F | F | F |
| 0.6680499911019240 | 0.8350800275685089 | 0.0631899982792987 | F | F | F |
| 0.1665399968694743 | 0.9999399781380731 | 0.0571300014870246 | F | F | F |
| 0.1647700071264779 | 0.3318099975501880 | 0.0630899965588227 | F | F | F |
| 0.1649599969669993 | 0.6678699851318157 | 0.0628300011305356 | F | F | F |
| 0.4995799959066858 | 0.9996899962566772 | 0.0621200017787373 | F | F | F |
| 0.5004400015054742 | 0.3341600000654878 | 0.0623699985549493 | F | F | F |
| 0.8335300087518434 | 0.0006599999888621 | 0.0593699999149706 | F | F | F |
| 0.8335000276869380 | 0.3339900076717370 | 0.0614399984580416 | F | F | F |
| 0.8345299959310495 | 0.6670100092759697 | 0.0590099990224289 | F | F | F |
| 0.1655199974769772 | 0.1649699956211279 | 0.0588000007106046 | F | F | F |
| 0.1689099967855014 | 0.5010300278786701 | 0.0695900022914344 | F | F | F |
| 0.1661600023717327 | 0.8336899876319350 | 0.0583200007559981 | F | F | F |
| 0.5000299811505329 | 0.1666100025210966 | 0.0600900016626156 | F | F | F |
| 0.4982599914069894 | 0.5016000270702463 | 0.0694800019188762 | F | F | F |
| 0.4988099932978187 | 0.8309299945801385 | 0.0696299970120435 | F | F | F |
| 0.8332399726153312 | 0.1666100025210966 | 0.0610099993636766 | F | F | F |
| 0.8332399726178181 | 0.4998199939886163 | 0.0600900016626156 | F | F | F |
| 0.8348900079967692 | 0.8343399763111563 | 0.0588699989124351 | F | F | F |
| 0.0547900013529556 | 0.1105799972670667 | 0.0582499988478276 | F | F | F |
| 0.0574500001527696 | 0.4450300037547379 | 0.0647099986659398 | F | F | F |
| 0.0552599988734528 | 0.7778099775364282 | 0.0577500015516321 | F | F | F |
| 0.3890799879994375 | 0.1110199987696632 | 0.0590200014557141 | F | F | F |
| 0.3847500086142546 | 0.4413599968097515 | 0.0698899999278808 | F | F | F |
| 0.3856300115637481 | 0.7774099707386029 | 0.0697999968969185 | F | F | F |
| 0.7216899990961423 | 0.1110199987696632 | 0.0616299994282770 | F | F | F |
| 0.7213600277433585 | 0.4436900019336107 | 0.0609799995887954 | F | F | F |
| 0.7239000201781849 | 0.7793800235195363 | 0.0617300011113215 | F | F | F |
| 0.0548500008969128 | 0.2779600024177142 | 0.0611100010467140 | F | F | F |
| 0.0548699982635696 | 0.6113299727824142 | 0.0609100013869721 | F | F | F |
| 0.0557399988174794 | 0.9441199898966843 | 0.0569700002542319 | F | F | F |
| 0.3894000053534441 | 0.2770200073944125 | 0.0612200014192723 | F | F | F |
| 0.3885200023536157 | 0.9449700116936768 | 0.0609200000764787 | F | F | F |
| 0.7219600081768291 | 0.2778800130081720 | 0.0612899996210956 | F | F | F |
| 0.7228400111134903 | 0.6104599833518947 | 0.0612800009690204 | F | F | F |
| 0.7218999862732431 | 0.9449999928237744 | 0.0611900016818296 | F | F | F |
| 0.2224700004002287 | 0.1112700029890163 | 0.0579399988155274 | F | F | F |
| 0.2239000052058842 | 0.4420799910817479 | 0.0698800012383671 | F | F | F |
| 0.2217099964610867 | 0.7781400084212819 | 0.0611599981631770 | F | F | F |
| 0.5554500222519394 | 0.1106600016727199 | 0.0609599985034350 | F | F | F |

|                    |                    |                    |   |   |   |
|--------------------|--------------------|--------------------|---|---|---|
| 0.5538799763018645 | 0.4459800124308089 | 0.0648500025197052 | F | F | F |
| 0.5577600002220393 | 0.7759199738370555 | 0.0699200034090950 | F | F | F |
| 0.8886299729346163 | 0.1112200022076308 | 0.0597000010326383 | F | F | F |
| 0.8891900181671417 | 0.4444000124669500 | 0.0609400011618462 | F | F | F |
| 0.8885800242332564 | 0.7773900031831715 | 0.0579899996383304 | F | F | F |
| 0.2204699963058161 | 0.2759700119173587 | 0.0616400018241308 | F | F | F |
| 0.2224200070404621 | 0.6142200231952089 | 0.0697799995553297 | F | F | F |
| 0.2220399975825629 | 0.9445899725293785 | 0.0577399991557783 | F | F | F |
| 0.5561599731237834 | 0.2784900069045193 | 0.0609700009367202 | F | F | F |
| 0.5584899783382440 | 0.6151199936777303 | 0.0699099972694697 | F | F | F |
| 0.5548200011515050 | 0.9423800111137410 | 0.0647599995261743 | F | F | F |
| 0.8888199925564066 | 0.2781499922028985 | 0.0615999996534029 | F | F | F |
| 0.8888300061197185 | 0.6107800006620749 | 0.0590399987973029 | F | F | F |
| 0.8892800212255736 | 0.9450600147559953 | 0.0582900010185554 | F | F | F |
| 0.2766295136799671 | 0.7553019251839465 | 0.2165166698477859 | T | T | T |
| 0.1886662071209995 | 0.6469637715851007 | 0.2209759752860022 | T | T | T |
| 0.2532081883901072 | 0.8226345360805601 | 0.1935818823266768 | T | T | T |
| 0.3696675534956944 | 0.7916848712551487 | 0.2338514658911367 | T | T | T |
| 0.0974660032520102 | 0.6160099435240513 | 0.2039011705417267 | T | T | T |
| 0.2023143093574021 | 0.6062463345783832 | 0.2537347889166430 | T | T | T |
| 0.3179937493175705 | 0.8902921599670165 | 0.1942765653232307 | T | T | T |

Structure17

\*CHOCOO\*H

1.0000000000000000

|                     |                     |                     |
|---------------------|---------------------|---------------------|
| 14.7840003966999998 | 0.0000000000000000  | 0.0000000000000000  |
| -7.3920001983999999 | 12.8033199130999993 | 0.0000000000000000  |
| 0.0000000000000000  | 0.0000000000000000  | 26.7110004425000014 |

|    |   |    |   |   |
|----|---|----|---|---|
| Cu | N | C  | O | H |
| 4  | 9 | 64 | 3 | 2 |

Selective dynamics

Direct

|                    |                    |                    |   |   |   |
|--------------------|--------------------|--------------------|---|---|---|
| 0.3883999883824316 | 0.6109899878387068 | 0.1237199976883616 | F | F | F |
| 0.4126669330281595 | 0.5462210011363531 | 0.2000585413137448 | T | T | T |
| 0.2599431199112150 | 0.5745906107738804 | 0.1887545628272491 | T | T | T |
| 0.4323925588048507 | 0.7128407583705986 | 0.2015167961381840 | T | T | T |
| 0.3273999989159151 | 0.6724299788206594 | 0.0770300030666817 | F | F | F |
| 0.3273600042078257 | 0.4895400106801233 | 0.0762199982880674 | F | F | F |
| 0.5102499723826810 | 0.6724500060481091 | 0.0761599987757577 | F | F | F |
| 0.9996700287274507 | 0.0001800000324650 | 0.0573600009216477 | F | F | F |
| 0.0003299999634265 | 0.3344300090962307 | 0.0625099986649431 | F | F | F |
| 0.9996899962509573 | 0.6666100025562471 | 0.0586999989901287 | F | F | F |
| 0.3332400024166660 | 0.0001599999854633 | 0.0586900003380535 | F | F | F |
| 0.6654199958038518 | 0.9995099902101501 | 0.0625599995251847 | F | F | F |

|                    |                    |                    |   |   |   |
|--------------------|--------------------|--------------------|---|---|---|
| 0.6666899919723832 | 0.3331600129459886 | 0.0612300001087860 | F | F | F |
| 0.3321700096157301 | 0.3312500119332853 | 0.0634699985367249 | F | F | F |
| 0.6686199903697627 | 0.6676899790852886 | 0.0635500028781806 | F | F | F |
| 0.9991999865008054 | 0.1663299948336885 | 0.0593199990547291 | F | F | F |
| 0.0001500000141448 | 0.5002700090658863 | 0.0620899982600847 | F | F | F |
| 0.9999099969734431 | 0.8333100080615523 | 0.0571499988286135 | F | F | F |
| 0.3328500091896487 | 0.1653199940614059 | 0.0589599981996258 | F | F | F |
| 0.3319799900125986 | 0.8348799943726348 | 0.0628399997826108 | F | F | F |
| 0.6658499836809995 | 0.1663399934903538 | 0.0614599995434091 | F | F | F |
| 0.6657000184196491 | 0.4994199871907909 | 0.0623999982923920 | F | F | F |
| 0.6680499911019240 | 0.8350800275685089 | 0.0631899982792987 | F | F | F |
| 0.1665399968694743 | 0.9999399781380731 | 0.0571300014870246 | F | F | F |
| 0.1647700071264779 | 0.3318099975501880 | 0.0630899965588227 | F | F | F |
| 0.1649599969669993 | 0.6678699851318157 | 0.0628300011305356 | F | F | F |
| 0.4995799959066858 | 0.9996899962566772 | 0.0621200017787373 | F | F | F |
| 0.5004400015054742 | 0.3341600000654878 | 0.0623699985549493 | F | F | F |
| 0.8335300087518434 | 0.0006599999888621 | 0.0593699999149706 | F | F | F |
| 0.8335000276869380 | 0.3339900076717370 | 0.0614399984580416 | F | F | F |
| 0.8345299959310495 | 0.6670100092759697 | 0.0590099990224289 | F | F | F |
| 0.1655199974769772 | 0.1649699956211279 | 0.0588000007106046 | F | F | F |
| 0.1689099967855014 | 0.5010300278786701 | 0.0695900022914344 | F | F | F |
| 0.1661600023717327 | 0.8336899876319350 | 0.0583200007559981 | F | F | F |
| 0.5000299811505329 | 0.1666100025210966 | 0.0600900016626156 | F | F | F |
| 0.4982599914069894 | 0.5016000270702463 | 0.0694800019188762 | F | F | F |
| 0.4988099932978187 | 0.8309299945801385 | 0.0696299970120435 | F | F | F |
| 0.8332399726153312 | 0.1666100025210966 | 0.0610099993636766 | F | F | F |
| 0.8332399726178181 | 0.4998199939886163 | 0.0600900016626156 | F | F | F |
| 0.8348900079967692 | 0.8343399763111563 | 0.0588699989124351 | F | F | F |
| 0.0547900013529556 | 0.1105799972670667 | 0.0582499988478276 | F | F | F |
| 0.0574500001527696 | 0.4450300037547379 | 0.0647099986659398 | F | F | F |
| 0.0552599988734528 | 0.7778099775364282 | 0.0577500015516321 | F | F | F |
| 0.3890799879994375 | 0.1110199987696632 | 0.0590200014557141 | F | F | F |
| 0.3847500086142546 | 0.4413599968097515 | 0.0698899999278808 | F | F | F |
| 0.3856300115637481 | 0.7774099707386029 | 0.0697999968969185 | F | F | F |
| 0.7216899990961423 | 0.1110199987696632 | 0.0616299994282770 | F | F | F |
| 0.7213600277433585 | 0.4436900019336107 | 0.0609799995887954 | F | F | F |
| 0.7239000201781849 | 0.7793800235195363 | 0.0617300011113215 | F | F | F |
| 0.0548500008969128 | 0.2779600024177142 | 0.0611100010467140 | F | F | F |
| 0.0548699982635696 | 0.6113299727824142 | 0.0609100013869721 | F | F | F |
| 0.0557399988174794 | 0.9441199898966843 | 0.0569700002542319 | F | F | F |
| 0.3894000053534441 | 0.2770200073944125 | 0.0612200014192723 | F | F | F |
| 0.3885200023536157 | 0.9449700116936768 | 0.0609200000764787 | F | F | F |
| 0.7219600081768291 | 0.2778800130081720 | 0.0612899996210956 | F | F | F |
| 0.7228400111134903 | 0.6104599833518947 | 0.0612800009690204 | F | F | F |

|                    |                    |                    |   |   |   |
|--------------------|--------------------|--------------------|---|---|---|
| 0.7218999862732431 | 0.9449999928237744 | 0.0611900016818296 | F | F | F |
| 0.2224700004002287 | 0.1112700029890163 | 0.0579399988155274 | F | F | F |
| 0.2239000052058842 | 0.4420799910817479 | 0.0698800012383671 | F | F | F |
| 0.2217099964610867 | 0.7781400084212819 | 0.0611599981631770 | F | F | F |
| 0.5554500222519394 | 0.1106600016727199 | 0.0609599985034350 | F | F | F |
| 0.5538799763018645 | 0.4459800124308089 | 0.0648500025197052 | F | F | F |
| 0.5577600002220393 | 0.7759199738370555 | 0.0699200034090950 | F | F | F |
| 0.8886299729346163 | 0.1112200022076308 | 0.0597000010326383 | F | F | F |
| 0.8891900181671417 | 0.4444000124669500 | 0.0609400011618462 | F | F | F |
| 0.8885800242332564 | 0.7773900031831715 | 0.0579899996383304 | F | F | F |
| 0.2204699963058161 | 0.2759700119173587 | 0.0616400018241308 | F | F | F |
| 0.2224200070404621 | 0.6142200231952089 | 0.0697799995553297 | F | F | F |
| 0.2220399975825629 | 0.9445899725293785 | 0.0577399991557783 | F | F | F |
| 0.5561599731237834 | 0.2784900069045193 | 0.0609700009367202 | F | F | F |
| 0.5584899783382440 | 0.6151199936777303 | 0.0699099972694697 | F | F | F |
| 0.5548200011515050 | 0.9423800111137410 | 0.0647599995261743 | F | F | F |
| 0.8888199925564066 | 0.2781499922028985 | 0.0615999996534029 | F | F | F |
| 0.8888300061197185 | 0.6107800006620749 | 0.0590399987973029 | F | F | F |
| 0.8892800212255736 | 0.9450600147559953 | 0.0582900010185554 | F | F | F |
| 0.2822310633704032 | 0.7696587846191887 | 0.2081522244393385 | T | T | T |
| 0.1970169494861521 | 0.6607136843199676 | 0.2179227594689356 | T | T | T |
| 0.2831324774320775 | 0.8380336845476147 | 0.1823897900367110 | T | T | T |
| 0.3794648546938080 | 0.7977027088722770 | 0.2367889286244683 | T | T | T |
| 0.1067454154645341 | 0.6260370676679821 | 0.1982729893104787 | T | T | T |
| 0.2069684895994849 | 0.6304736035294093 | 0.2550435390878540 | T | T | T |
| 0.4209795245994469 | 0.8736385633113567 | 0.2325638641088852 | T | T | T |

### Structure18

\*CHOHCOHO\*

1.0000000000000000

|                     |                     |                     |
|---------------------|---------------------|---------------------|
| 14.7840003966999998 | 0.0000000000000000  | 0.0000000000000000  |
| -7.3920001983999999 | 12.8033199130999993 | 0.0000000000000000  |
| 0.0000000000000000  | 0.0000000000000000  | 26.7110004425000014 |

|    |   |    |   |   |
|----|---|----|---|---|
| Cu | N | C  | O | H |
| 4  | 9 | 64 | 3 | 3 |

Selective dynamics

Direct

|                    |                    |                    |   |   |   |
|--------------------|--------------------|--------------------|---|---|---|
| 0.3883999883824316 | 0.6109899878387068 | 0.1237199976883616 | F | F | F |
| 0.4137677100225282 | 0.5661661045993702 | 0.2038323992550017 | T | T | T |
| 0.2577143729899863 | 0.5810786585845761 | 0.1896044663601419 | T | T | T |
| 0.4278665495079121 | 0.7315228458891687 | 0.1948169456502791 | T | T | T |
| 0.3273999989159151 | 0.6724299788206594 | 0.0770300030666817 | F | F | F |
| 0.3273600042078257 | 0.4895400106801233 | 0.0762199982880674 | F | F | F |
| 0.5102499723826810 | 0.6724500060481091 | 0.0761599987757577 | F | F | F |

|                    |                    |                    |   |   |   |
|--------------------|--------------------|--------------------|---|---|---|
| 0.9996700287274507 | 0.0001800000324650 | 0.0573600009216477 | F | F | F |
| 0.0003299999634265 | 0.3344300090962307 | 0.0625099986649431 | F | F | F |
| 0.9996899962509573 | 0.6666100025562471 | 0.0586999989901287 | F | F | F |
| 0.3332400024166660 | 0.0001599999854633 | 0.0586900003380535 | F | F | F |
| 0.6654199958038518 | 0.9995099902101501 | 0.0625599995251847 | F | F | F |
| 0.6666899919723832 | 0.3331600129459886 | 0.0612300001087860 | F | F | F |
| 0.3321700096157301 | 0.3312500119332853 | 0.0634699985367249 | F | F | F |
| 0.6686199903697627 | 0.6676899790852886 | 0.0635500028781806 | F | F | F |
| 0.9991999865008054 | 0.1663299948336885 | 0.0593199990547291 | F | F | F |
| 0.0001500000141448 | 0.5002700090658863 | 0.0620899982600847 | F | F | F |
| 0.9999099969734431 | 0.8333100080615523 | 0.0571499988286135 | F | F | F |
| 0.3328500091896487 | 0.1653199940614059 | 0.0589599981996258 | F | F | F |
| 0.3319799900125986 | 0.8348799943726348 | 0.0628399997826108 | F | F | F |
| 0.6658499836809995 | 0.1663399934903538 | 0.0614599995434091 | F | F | F |
| 0.6657000184196491 | 0.4994199871907909 | 0.0623999982923920 | F | F | F |
| 0.6680499911019240 | 0.8350800275685089 | 0.0631899982792987 | F | F | F |
| 0.1665399968694743 | 0.9999399781380731 | 0.0571300014870246 | F | F | F |
| 0.1647700071264779 | 0.3318099975501880 | 0.0630899965588227 | F | F | F |
| 0.1649599969669993 | 0.6678699851318157 | 0.0628300011305356 | F | F | F |
| 0.4995799959066858 | 0.9996899962566772 | 0.0621200017787373 | F | F | F |
| 0.5004400015054742 | 0.3341600000654878 | 0.0623699985549493 | F | F | F |
| 0.8335300087518434 | 0.0006599999888621 | 0.0593699999149706 | F | F | F |
| 0.8335000276869380 | 0.3339900076717370 | 0.0614399984580416 | F | F | F |
| 0.8345299959310495 | 0.6670100092759697 | 0.0590099990224289 | F | F | F |
| 0.1655199974769772 | 0.1649699956211279 | 0.0588000007106046 | F | F | F |
| 0.1689099967855014 | 0.5010300278786701 | 0.0695900022914344 | F | F | F |
| 0.1661600023717327 | 0.8336899876319350 | 0.0583200007559981 | F | F | F |
| 0.5000299811505329 | 0.1666100025210966 | 0.0600900016626156 | F | F | F |
| 0.4982599914069894 | 0.5016000270702463 | 0.0694800019188762 | F | F | F |
| 0.4988099932978187 | 0.8309299945801385 | 0.0696299970120435 | F | F | F |
| 0.8332399726153312 | 0.1666100025210966 | 0.0610099993636766 | F | F | F |
| 0.8332399726178181 | 0.4998199939886163 | 0.0600900016626156 | F | F | F |
| 0.8348900079967692 | 0.8343399763111563 | 0.0588699989124351 | F | F | F |
| 0.0547900013529556 | 0.1105799972670667 | 0.0582499988478276 | F | F | F |
| 0.0574500001527696 | 0.4450300037547379 | 0.0647099986659398 | F | F | F |
| 0.0552599988734528 | 0.7778099775364282 | 0.0577500015516321 | F | F | F |
| 0.3890799879994375 | 0.1110199987696632 | 0.0590200014557141 | F | F | F |
| 0.3847500086142546 | 0.4413599968097515 | 0.0698899999278808 | F | F | F |
| 0.3856300115637481 | 0.7774099707386029 | 0.0697999968969185 | F | F | F |
| 0.7216899990961423 | 0.1110199987696632 | 0.0616299994282770 | F | F | F |
| 0.7213600277433585 | 0.4436900019336107 | 0.0609799995887954 | F | F | F |
| 0.7239000201781849 | 0.7793800235195363 | 0.0617300011113215 | F | F | F |
| 0.0548500008969128 | 0.2779600024177142 | 0.0611100010467140 | F | F | F |
| 0.0548699982635696 | 0.6113299727824142 | 0.0609100013869721 | F | F | F |



|                    |                    |                    |   |   |   |
|--------------------|--------------------|--------------------|---|---|---|
| 0.0557399988174794 | 0.9441199898966843 | 0.0569700002542319 | F | F | F |
| 0.3894000053534441 | 0.2770200073944125 | 0.0612200014192723 | F | F | F |
| 0.3885200023536157 | 0.9449700116936768 | 0.0609200000764787 | F | F | F |
| 0.7219600081768291 | 0.2778800130081720 | 0.0612899996210956 | F | F | F |
| 0.7228400111134903 | 0.6104599833518947 | 0.0612800009690204 | F | F | F |
| 0.7218999862732431 | 0.9449999928237744 | 0.0611900016818296 | F | F | F |
| 0.2224700004002287 | 0.1112700029890163 | 0.0579399988155274 | F | F | F |
| 0.2239000052058842 | 0.4420799910817479 | 0.0698800012383671 | F | F | F |
| 0.2217099964610867 | 0.7781400084212819 | 0.0611599981631770 | F | F | F |
| 0.5554500222519394 | 0.1106600016727199 | 0.0609599985034350 | F | F | F |
| 0.5538799763018645 | 0.4459800124308089 | 0.0648500025197052 | F | F | F |
| 0.5577600002220393 | 0.7759199738370555 | 0.0699200034090950 | F | F | F |
| 0.8886299729346163 | 0.1112200022076308 | 0.0597000010326383 | F | F | F |
| 0.8891900181671417 | 0.4444000124669500 | 0.0609400011618462 | F | F | F |
| 0.8885800242332564 | 0.7773900031831715 | 0.0579899996383304 | F | F | F |
| 0.2204699963058161 | 0.2759700119173587 | 0.0616400018241308 | F | F | F |
| 0.2224200070404621 | 0.6142200231952089 | 0.0697799995553297 | F | F | F |
| 0.2220399975825629 | 0.9445899725293785 | 0.0577399991557783 | F | F | F |
| 0.5561599731237834 | 0.2784900069045193 | 0.0609700009367202 | F | F | F |
| 0.5584899783382440 | 0.6151199936777303 | 0.0699099972694697 | F | F | F |
| 0.5548200011515050 | 0.9423800111137410 | 0.0647599995261743 | F | F | F |
| 0.8888199925564066 | 0.2781499922028985 | 0.0615999996534029 | F | F | F |
| 0.8888300061197185 | 0.6107800006620749 | 0.0590399987973029 | F | F | F |
| 0.8892800212255736 | 0.9450600147559953 | 0.0582900010185554 | F | F | F |
| 0.2647121627167290 | 0.7647978547389555 | 0.2110494554969266 | T | T | T |
| 0.1985643107203300 | 0.6559808673014276 | 0.2272650511992926 | T | T | T |
| 0.2148351212569158 | 0.8126158282835910 | 0.1927233335892930 | T | T | T |
| 0.3636577799567897 | 0.8159452918136735 | 0.2112599364531790 | T | T | T |
| 0.0887302993796062 | 0.6249240278415347 | 0.2232767874303730 | T | T | T |
| 0.1396701376261943 | 0.7599500571504558 | 0.1968867363062591 | T | T | T |
| 0.2199406997424165 | 0.6440361053301112 | 0.2651907023330748 | T | T | T |
| 0.0612068831952987 | 0.6221878305403843 | 0.2567407173309100 | T | T | T |

Structure19

\*CHOHCOHO

1.0000000000000000

|                     |                     |                     |
|---------------------|---------------------|---------------------|
| 14.7840003966999998 | 0.0000000000000000  | 0.0000000000000000  |
| -7.3920001983999999 | 12.8033199130999993 | 0.0000000000000000  |
| 0.0000000000000000  | 0.0000000000000000  | 26.7110004425000014 |

| Cu | N | C  | O | H |
|----|---|----|---|---|
| 4  | 9 | 64 | 3 | 3 |

Selective dynamics

Direct

|                    |                    |                    |   |   |   |
|--------------------|--------------------|--------------------|---|---|---|
| 0.3883999883824316 | 0.6109899878387068 | 0.1237199976883616 | F | F | F |
|--------------------|--------------------|--------------------|---|---|---|

|                    |                    |                    |   |   |   |
|--------------------|--------------------|--------------------|---|---|---|
| 0.4071006227209017 | 0.5561790754850325 | 0.2029264582939007 | T | T | T |
| 0.2593851713475057 | 0.5852532344198533 | 0.1898602879289139 | T | T | T |
| 0.4348392342261472 | 0.7271548017190013 | 0.1968490416645048 | T | T | T |
| 0.3273999989159151 | 0.6724299788206594 | 0.0770300030666817 | F | F | F |
| 0.3273600042078257 | 0.4895400106801233 | 0.0762199982880674 | F | F | F |
| 0.5102499723826810 | 0.6724500060481091 | 0.0761599987757577 | F | F | F |
| 0.9996700287274507 | 0.0001800000324650 | 0.0573600009216477 | F | F | F |
| 0.0003299999634265 | 0.3344300090962307 | 0.0625099986649431 | F | F | F |
| 0.9996899962509573 | 0.6666100025562471 | 0.0586999989901287 | F | F | F |
| 0.3332400024166660 | 0.0001599999854633 | 0.0586900003380535 | F | F | F |
| 0.6654199958038518 | 0.9995099902101501 | 0.0625599995251847 | F | F | F |
| 0.6666899919723832 | 0.3331600129459886 | 0.0612300001087860 | F | F | F |
| 0.3321700096157301 | 0.3312500119332853 | 0.0634699985367249 | F | F | F |
| 0.6686199903697627 | 0.6676899790852886 | 0.0635500028781806 | F | F | F |
| 0.9991999865008054 | 0.1663299948336885 | 0.0593199990547291 | F | F | F |
| 0.0001500000141448 | 0.5002700090658863 | 0.0620899982600847 | F | F | F |
| 0.9999099969734431 | 0.8333100080615523 | 0.0571499988286135 | F | F | F |
| 0.3328500091896487 | 0.1653199940614059 | 0.0589599981996258 | F | F | F |
| 0.3319799900125986 | 0.8348799943726348 | 0.0628399997826108 | F | F | F |
| 0.6658499836809995 | 0.1663399934903538 | 0.0614599995434091 | F | F | F |
| 0.6657000184196491 | 0.4994199871907909 | 0.0623999982923920 | F | F | F |
| 0.6680499911019240 | 0.8350800275685089 | 0.0631899982792987 | F | F | F |
| 0.1665399968694743 | 0.9999399781380731 | 0.0571300014870246 | F | F | F |
| 0.1647700071264779 | 0.3318099975501880 | 0.0630899965588227 | F | F | F |
| 0.1649599969669993 | 0.6678699851318157 | 0.0628300011305356 | F | F | F |
| 0.4995799959066858 | 0.9996899962566772 | 0.0621200017787373 | F | F | F |
| 0.5004400015054742 | 0.3341600000654878 | 0.0623699985549493 | F | F | F |
| 0.8335300087518434 | 0.0006599999888621 | 0.0593699999149706 | F | F | F |
| 0.8335000276869380 | 0.3339900076717370 | 0.0614399984580416 | F | F | F |
| 0.8345299959310495 | 0.6670100092759697 | 0.0590099990224289 | F | F | F |
| 0.1655199974769772 | 0.1649699956211279 | 0.0588000007106046 | F | F | F |
| 0.1689099967855014 | 0.5010300278786701 | 0.0695900022914344 | F | F | F |
| 0.1661600023717327 | 0.8336899876319350 | 0.0583200007559981 | F | F | F |
| 0.5000299811505329 | 0.1666100025210966 | 0.0600900016626156 | F | F | F |
| 0.4982599914069894 | 0.5016000270702463 | 0.0694800019188762 | F | F | F |
| 0.4988099932978187 | 0.8309299945801385 | 0.0696299970120435 | F | F | F |
| 0.8332399726153312 | 0.1666100025210966 | 0.0610099993636766 | F | F | F |
| 0.8332399726178181 | 0.4998199939886163 | 0.0600900016626156 | F | F | F |
| 0.8348900079967692 | 0.8343399763111563 | 0.0588699989124351 | F | F | F |
| 0.0547900013529556 | 0.1105799972670667 | 0.0582499988478276 | F | F | F |
| 0.0574500001527696 | 0.4450300037547379 | 0.0647099986659398 | F | F | F |
| 0.0552599988734528 | 0.7778099775364282 | 0.0577500015516321 | F | F | F |
| 0.3890799879994375 | 0.1110199987696632 | 0.0590200014557141 | F | F | F |
| 0.3847500086142546 | 0.4413599968097515 | 0.0698899999278808 | F | F | F |

|                    |                    |                    |   |   |   |
|--------------------|--------------------|--------------------|---|---|---|
| 0.3856300115637481 | 0.7774099707386029 | 0.0697999968969185 | F | F | F |
| 0.7216899990961423 | 0.1110199987696632 | 0.0616299994282770 | F | F | F |
| 0.7213600277433585 | 0.4436900019336107 | 0.0609799995887954 | F | F | F |
| 0.7239000201781849 | 0.7793800235195363 | 0.0617300011113215 | F | F | F |
| 0.0548500008969128 | 0.2779600024177142 | 0.0611100010467140 | F | F | F |
| 0.0548699982635696 | 0.6113299727824142 | 0.0609100013869721 | F | F | F |
| 0.0557399988174794 | 0.9441199898966843 | 0.0569700002542319 | F | F | F |
| 0.3894000053534441 | 0.2770200073944125 | 0.0612200014192723 | F | F | F |
| 0.3885200023536157 | 0.9449700116936768 | 0.0609200000764787 | F | F | F |
| 0.7219600081768291 | 0.2778800130081720 | 0.0612899996210956 | F | F | F |
| 0.7228400111134903 | 0.6104599833518947 | 0.0612800009690204 | F | F | F |
| 0.7218999862732431 | 0.9449999928237744 | 0.0611900016818296 | F | F | F |
| 0.2224700004002287 | 0.1112700029890163 | 0.0579399988155274 | F | F | F |
| 0.2239000052058842 | 0.4420799910817479 | 0.0698800012383671 | F | F | F |
| 0.2217099964610867 | 0.7781400084212819 | 0.0611599981631770 | F | F | F |
| 0.5554500222519394 | 0.1106600016727199 | 0.0609599985034350 | F | F | F |
| 0.5538799763018645 | 0.4459800124308089 | 0.0648500025197052 | F | F | F |
| 0.5577600002220393 | 0.7759199738370555 | 0.0699200034090950 | F | F | F |
| 0.8886299729346163 | 0.1112200022076308 | 0.0597000010326383 | F | F | F |
| 0.8891900181671417 | 0.4444000124669500 | 0.0609400011618462 | F | F | F |
| 0.8885800242332564 | 0.7773900031831715 | 0.0579899996383304 | F | F | F |
| 0.2204699963058161 | 0.2759700119173587 | 0.0616400018241308 | F | F | F |
| 0.2224200070404621 | 0.6142200231952089 | 0.0697799995553297 | F | F | F |
| 0.2220399975825629 | 0.9445899725293785 | 0.0577399991557783 | F | F | F |
| 0.5561599731237834 | 0.2784900069045193 | 0.0609700009367202 | F | F | F |
| 0.5584899783382440 | 0.6151199936777303 | 0.0699099972694697 | F | F | F |
| 0.5548200011515050 | 0.9423800111137410 | 0.0647599995261743 | F | F | F |
| 0.8888199925564066 | 0.2781499922028985 | 0.0615999996534029 | F | F | F |
| 0.8888300061197185 | 0.6107800006620749 | 0.0590399987973029 | F | F | F |
| 0.8892800212255736 | 0.9450600147559953 | 0.0582900010185554 | F | F | F |
| 0.2772412588894713 | 0.7678104109341566 | 0.2145535170253430 | T | T | T |
| 0.2059416381224889 | 0.6630871031055755 | 0.2313653939086286 | T | T | T |
| 0.2306087159323841 | 0.8189088947157610 | 0.1941652870721233 | T | T | T |
| 0.3772160262201486 | 0.8164984860899666 | 0.2156423699636213 | T | T | T |
| 0.0980666321951096 | 0.6304561318794615 | 0.2330599023910870 | T | T | T |
| 0.0860946991905356 | 0.6746505369308269 | 0.2101175820759809 | T | T | T |
| 0.2303356155890679 | 0.6452147210455447 | 0.2671125896100873 | T | T | T |
| 0.2870525305007631 | 0.8851511108720413 | 0.1811694567082164 | T | T | T |

Structure20

HOCH<sub>2</sub>COO\*

1.0000000000000000

|                     |                     |                    |
|---------------------|---------------------|--------------------|
| 14.7840003966999998 | 0.0000000000000000  | 0.0000000000000000 |
| -7.3920001983999999 | 12.8033199130999993 | 0.0000000000000000 |

0.0000000000000000 0.0000000000000000 26.7110004425000014  
 Cu N C O H  
 4 9 64 3 3

Selective dynamics

Direct

|                    |                    |                    |   |   |   |
|--------------------|--------------------|--------------------|---|---|---|
| 0.3883999883824316 | 0.6109899878387068 | 0.1237199976883616 | F | F | F |
| 0.4715063535606444 | 0.6279750236771574 | 0.2020462934634048 | T | T | T |
| 0.2867382936459545 | 0.5309389943392452 | 0.1967112860251337 | T | T | T |
| 0.3755516172726853 | 0.7163422823619192 | 0.1924958856442612 | T | T | T |
| 0.3273999989159151 | 0.6724299788206594 | 0.0770300030666817 | F | F | F |
| 0.3273600042078257 | 0.4895400106801233 | 0.0762199982880674 | F | F | F |
| 0.5102499723826810 | 0.6724500060481091 | 0.0761599987757577 | F | F | F |
| 0.9996700287274507 | 0.0001800000324650 | 0.0573600009216477 | F | F | F |
| 0.0003299999634265 | 0.3344300090962307 | 0.0625099986649431 | F | F | F |
| 0.9996899962509573 | 0.6666100025562471 | 0.0586999989901287 | F | F | F |
| 0.3332400024166660 | 0.0001599999854633 | 0.0586900003380535 | F | F | F |
| 0.6654199958038518 | 0.9995099902101501 | 0.0625599995251847 | F | F | F |
| 0.6666899919723832 | 0.3331600129459886 | 0.0612300001087860 | F | F | F |
| 0.3321700096157301 | 0.3312500119332853 | 0.0634699985367249 | F | F | F |
| 0.6686199903697627 | 0.6676899790852886 | 0.0635500028781806 | F | F | F |
| 0.9991999865008054 | 0.1663299948336885 | 0.0593199990547291 | F | F | F |
| 0.0001500000141448 | 0.5002700090658863 | 0.0620899982600847 | F | F | F |
| 0.9999099969734431 | 0.8333100080615523 | 0.0571499988286135 | F | F | F |
| 0.3328500091896487 | 0.1653199940614059 | 0.0589599981996258 | F | F | F |
| 0.3319799900125986 | 0.8348799943726348 | 0.0628399997826108 | F | F | F |
| 0.6658499836809995 | 0.1663399934903538 | 0.0614599995434091 | F | F | F |
| 0.6657000184196491 | 0.4994199871907909 | 0.0623999982923920 | F | F | F |
| 0.6680499911019240 | 0.8350800275685089 | 0.0631899982792987 | F | F | F |
| 0.1665399968694743 | 0.9999399781380731 | 0.0571300014870246 | F | F | F |
| 0.1647700071264779 | 0.3318099975501880 | 0.0630899965588227 | F | F | F |
| 0.1649599969669993 | 0.6678699851318157 | 0.0628300011305356 | F | F | F |
| 0.4995799959066858 | 0.9996899962566772 | 0.0621200017787373 | F | F | F |
| 0.5004400015054742 | 0.3341600000654878 | 0.0623699985549493 | F | F | F |
| 0.8335300087518434 | 0.0006599999888621 | 0.0593699999149706 | F | F | F |
| 0.8335000276869380 | 0.3339900076717370 | 0.0614399984580416 | F | F | F |
| 0.8345299959310495 | 0.6670100092759697 | 0.0590099990224289 | F | F | F |
| 0.1655199974769772 | 0.1649699956211279 | 0.0588000007106046 | F | F | F |
| 0.1689099967855014 | 0.5010300278786701 | 0.0695900022914344 | F | F | F |
| 0.1661600023717327 | 0.8336899876319350 | 0.0583200007559981 | F | F | F |
| 0.5000299811505329 | 0.1666100025210966 | 0.0600900016626156 | F | F | F |
| 0.4982599914069894 | 0.5016000270702463 | 0.0694800019188762 | F | F | F |
| 0.4988099932978187 | 0.8309299945801385 | 0.0696299970120435 | F | F | F |
| 0.8332399726153312 | 0.1666100025210966 | 0.0610099993636766 | F | F | F |
| 0.8332399726178181 | 0.4998199939886163 | 0.0600900016626156 | F | F | F |

|                    |                    |                    |   |   |   |
|--------------------|--------------------|--------------------|---|---|---|
| 0.8348900079967692 | 0.8343399763111563 | 0.0588699989124351 | F | F | F |
| 0.0547900013529556 | 0.1105799972670667 | 0.0582499988478276 | F | F | F |
| 0.0574500001527696 | 0.4450300037547379 | 0.0647099986659398 | F | F | F |
| 0.0552599988734528 | 0.7778099775364282 | 0.0577500015516321 | F | F | F |
| 0.3890799879994375 | 0.1110199987696632 | 0.0590200014557141 | F | F | F |
| 0.3847500086142546 | 0.4413599968097515 | 0.0698899999278808 | F | F | F |
| 0.3856300115637481 | 0.7774099707386029 | 0.0697999968969185 | F | F | F |
| 0.7216899990961423 | 0.1110199987696632 | 0.0616299994282770 | F | F | F |
| 0.7213600277433585 | 0.4436900019336107 | 0.0609799995887954 | F | F | F |
| 0.7239000201781849 | 0.7793800235195363 | 0.0617300011113215 | F | F | F |
| 0.0548500008969128 | 0.2779600024177142 | 0.0611100010467140 | F | F | F |
| 0.0548699982635696 | 0.6113299727824142 | 0.0609100013869721 | F | F | F |
| 0.0557399988174794 | 0.9441199898966843 | 0.0569700002542319 | F | F | F |
| 0.3894000053534441 | 0.2770200073944125 | 0.0612200014192723 | F | F | F |
| 0.3885200023536157 | 0.9449700116936768 | 0.0609200000764787 | F | F | F |
| 0.7219600081768291 | 0.2778800130081720 | 0.0612899996210956 | F | F | F |
| 0.7228400111134903 | 0.6104599833518947 | 0.0612800009690204 | F | F | F |
| 0.7218999862732431 | 0.9449999928237744 | 0.0611900016818296 | F | F | F |
| 0.2224700004002287 | 0.1112700029890163 | 0.0579399988155274 | F | F | F |
| 0.2239000052058842 | 0.4420799910817479 | 0.0698800012383671 | F | F | F |
| 0.2217099964610867 | 0.7781400084212819 | 0.0611599981631770 | F | F | F |
| 0.5554500222519394 | 0.1106600016727199 | 0.0609599985034350 | F | F | F |
| 0.5538799763018645 | 0.4459800124308089 | 0.0648500025197052 | F | F | F |
| 0.5577600002220393 | 0.7759199738370555 | 0.0699200034090950 | F | F | F |
| 0.8886299729346163 | 0.1112200022076308 | 0.0597000010326383 | F | F | F |
| 0.8891900181671417 | 0.4444000124669500 | 0.0609400011618462 | F | F | F |
| 0.8885800242332564 | 0.7773900031831715 | 0.0579899996383304 | F | F | F |
| 0.2204699963058161 | 0.2759700119173587 | 0.0616400018241308 | F | F | F |
| 0.2224200070404621 | 0.6142200231952089 | 0.0697799995553297 | F | F | F |
| 0.2220399975825629 | 0.9445899725293785 | 0.0577399991557783 | F | F | F |
| 0.5561599731237834 | 0.2784900069045193 | 0.0609700009367202 | F | F | F |
| 0.5584899783382440 | 0.6151199936777303 | 0.0699099972694697 | F | F | F |
| 0.5548200011515050 | 0.9423800111137410 | 0.0647599995261743 | F | F | F |
| 0.8888199925564066 | 0.2781499922028985 | 0.0615999996534029 | F | F | F |
| 0.8888300061197185 | 0.6107800006620749 | 0.0590399987973029 | F | F | F |
| 0.8892800212255736 | 0.9450600147559953 | 0.0582900010185554 | F | F | F |
| 0.2504210888781649 | 0.8104945131265926 | 0.2000438697923958 | T | T | T |
| 0.1666313381389699 | 0.7100561719728218 | 0.2254070877318236 | T | T | T |
| 0.2246013613637422 | 0.8746002939501075 | 0.1859999382214882 | T | T | T |
| 0.3437914482878136 | 0.8233009181964195 | 0.1948061589297154 | T | T | T |
| 0.0694758984890998 | 0.7069746282353594 | 0.2260257633127617 | T | T | T |
| 0.0875314293638778 | 0.7752265555674378 | 0.2111751600445579 | T | T | T |
| 0.1930738063619811 | 0.7070393671866915 | 0.2637916240149855 | T | T | T |
| 0.1605830268244610 | 0.6419319315325979 | 0.2049032301168459 | T | T | T |

Structure21

\*CHOHCOHO

1.0000000000000000

|                     |                     |                     |
|---------------------|---------------------|---------------------|
| 14.7840003966999998 | 0.0000000000000000  | 0.0000000000000000  |
| -7.3920001983999999 | 12.8033199130999993 | 0.0000000000000000  |
| 0.0000000000000000  | 0.0000000000000000  | 26.7110004425000014 |

|    |   |    |   |   |
|----|---|----|---|---|
| Cu | N | C  | O | H |
| 4  | 9 | 64 | 3 | 3 |

Selective dynamics

Direct

|                    |                    |                    |   |   |   |
|--------------------|--------------------|--------------------|---|---|---|
| 0.3883999883824316 | 0.6109899878387068 | 0.1237199976883616 | F | F | F |
| 0.4126077352208609 | 0.5653239271131899 | 0.2038751997754915 | T | T | T |
| 0.2586281140677277 | 0.5825117821708886 | 0.1890289509851615 | T | T | T |
| 0.4280463969735188 | 0.7312677353460800 | 0.1942083787532942 | T | T | T |
| 0.3273999989159151 | 0.6724299788206594 | 0.0770300030666817 | F | F | F |
| 0.3273600042078257 | 0.4895400106801233 | 0.0762199982880674 | F | F | F |
| 0.5102499723826810 | 0.6724500060481091 | 0.0761599987757577 | F | F | F |
| 0.9996700287274507 | 0.0001800000324650 | 0.0573600009216477 | F | F | F |
| 0.0003299999634265 | 0.3344300090962307 | 0.0625099986649431 | F | F | F |
| 0.9996899962509573 | 0.6666100025562471 | 0.0586999989901287 | F | F | F |
| 0.3332400024166660 | 0.0001599999854633 | 0.0586900003380535 | F | F | F |
| 0.6654199958038518 | 0.9995099902101501 | 0.0625599995251847 | F | F | F |
| 0.6666899919723832 | 0.3331600129459886 | 0.0612300001087860 | F | F | F |
| 0.3321700096157301 | 0.3312500119332853 | 0.0634699985367249 | F | F | F |
| 0.6686199903697627 | 0.6676899790852886 | 0.0635500028781806 | F | F | F |
| 0.9991999865008054 | 0.1663299948336885 | 0.0593199990547291 | F | F | F |
| 0.0001500000141448 | 0.5002700090658863 | 0.0620899982600847 | F | F | F |
| 0.9999099969734431 | 0.8333100080615523 | 0.0571499988286135 | F | F | F |
| 0.3328500091896487 | 0.1653199940614059 | 0.0589599981996258 | F | F | F |
| 0.3319799900125986 | 0.8348799943726348 | 0.0628399997826108 | F | F | F |
| 0.6658499836809995 | 0.1663399934903538 | 0.0614599995434091 | F | F | F |
| 0.6657000184196491 | 0.4994199871907909 | 0.0623999982923920 | F | F | F |
| 0.6680499911019240 | 0.8350800275685089 | 0.0631899982792987 | F | F | F |
| 0.1665399968694743 | 0.9999399781380731 | 0.0571300014870246 | F | F | F |
| 0.1647700071264779 | 0.3318099975501880 | 0.0630899965588227 | F | F | F |
| 0.1649599969669993 | 0.6678699851318157 | 0.0628300011305356 | F | F | F |
| 0.4995799959066858 | 0.9996899962566772 | 0.0621200017787373 | F | F | F |
| 0.5004400015054742 | 0.3341600000654878 | 0.0623699985549493 | F | F | F |
| 0.8335300087518434 | 0.0006599999888621 | 0.0593699999149706 | F | F | F |
| 0.8335000276869380 | 0.3339900076717370 | 0.0614399984580416 | F | F | F |
| 0.8345299959310495 | 0.6670100092759697 | 0.0590099990224289 | F | F | F |
| 0.1655199974769772 | 0.1649699956211279 | 0.0588000007106046 | F | F | F |
| 0.1689099967855014 | 0.5010300278786701 | 0.0695900022914344 | F | F | F |

|                    |                    |                    |   |   |   |
|--------------------|--------------------|--------------------|---|---|---|
| 0.1661600023717327 | 0.8336899876319350 | 0.0583200007559981 | F | F | F |
| 0.5000299811505329 | 0.1666100025210966 | 0.0600900016626156 | F | F | F |
| 0.4982599914069894 | 0.5016000270702463 | 0.0694800019188762 | F | F | F |
| 0.4988099932978187 | 0.8309299945801385 | 0.0696299970120435 | F | F | F |
| 0.8332399726153312 | 0.1666100025210966 | 0.0610099993636766 | F | F | F |
| 0.8332399726178181 | 0.4998199939886163 | 0.0600900016626156 | F | F | F |
| 0.8348900079967692 | 0.8343399763111563 | 0.0588699989124351 | F | F | F |
| 0.0547900013529556 | 0.1105799972670667 | 0.0582499988478276 | F | F | F |
| 0.0574500001527696 | 0.4450300037547379 | 0.0647099986659398 | F | F | F |
| 0.0552599988734528 | 0.7778099775364282 | 0.0577500015516321 | F | F | F |
| 0.3890799879994375 | 0.1110199987696632 | 0.0590200014557141 | F | F | F |
| 0.3847500086142546 | 0.4413599968097515 | 0.0698899999278808 | F | F | F |
| 0.3856300115637481 | 0.7774099707386029 | 0.0697999968969185 | F | F | F |
| 0.7216899990961423 | 0.1110199987696632 | 0.0616299994282770 | F | F | F |
| 0.7213600277433585 | 0.4436900019336107 | 0.0609799995887954 | F | F | F |
| 0.7239000201781849 | 0.7793800235195363 | 0.0617300011113215 | F | F | F |
| 0.0548500008969128 | 0.2779600024177142 | 0.0611100010467140 | F | F | F |
| 0.0548699982635696 | 0.6113299727824142 | 0.0609100013869721 | F | F | F |
| 0.0557399988174794 | 0.9441199898966843 | 0.0569700002542319 | F | F | F |
| 0.3894000053534441 | 0.2770200073944125 | 0.0612200014192723 | F | F | F |
| 0.3885200023536157 | 0.9449700116936768 | 0.0609200000764787 | F | F | F |
| 0.7219600081768291 | 0.2778800130081720 | 0.0612899996210956 | F | F | F |
| 0.7228400111134903 | 0.6104599833518947 | 0.0612800009690204 | F | F | F |
| 0.7218999862732431 | 0.9449999928237744 | 0.0611900016818296 | F | F | F |
| 0.2224700004002287 | 0.1112700029890163 | 0.0579399988155274 | F | F | F |
| 0.2239000052058842 | 0.4420799910817479 | 0.0698800012383671 | F | F | F |
| 0.2217099964610867 | 0.7781400084212819 | 0.0611599981631770 | F | F | F |
| 0.5554500222519394 | 0.1106600016727199 | 0.0609599985034350 | F | F | F |
| 0.5538799763018645 | 0.4459800124308089 | 0.0648500025197052 | F | F | F |
| 0.5577600002220393 | 0.7759199738370555 | 0.0699200034090950 | F | F | F |
| 0.8886299729346163 | 0.1112200022076308 | 0.0597000010326383 | F | F | F |
| 0.8891900181671417 | 0.4444000124669500 | 0.0609400011618462 | F | F | F |
| 0.8885800242332564 | 0.7773900031831715 | 0.0579899996383304 | F | F | F |
| 0.2204699963058161 | 0.2759700119173587 | 0.0616400018241308 | F | F | F |
| 0.2224200070404621 | 0.6142200231952089 | 0.0697799995553297 | F | F | F |
| 0.2220399975825629 | 0.9445899725293785 | 0.0577399991557783 | F | F | F |
| 0.5561599731237834 | 0.2784900069045193 | 0.0609700009367202 | F | F | F |
| 0.5584899783382440 | 0.6151199936777303 | 0.0699099972694697 | F | F | F |
| 0.5548200011515050 | 0.9423800111137410 | 0.0647599995261743 | F | F | F |
| 0.8888199925564066 | 0.2781499922028985 | 0.0615999996534029 | F | F | F |
| 0.8888300061197185 | 0.6107800006620749 | 0.0590399987973029 | F | F | F |
| 0.8892800212255736 | 0.9450600147559953 | 0.0582900010185554 | F | F | F |
| 0.2636002583902679 | 0.7637924399232233 | 0.2110309204460184 | T | T | T |
| 0.1978223760731063 | 0.6555529865743995 | 0.2271274858966024 | T | T | T |

|                    |                    |                    |   |   |   |
|--------------------|--------------------|--------------------|---|---|---|
| 0.2146480777541513 | 0.8123517092796664 | 0.1923775595300646 | T | T | T |
| 0.3631033365486986 | 0.8160296720341358 | 0.2115693896367877 | T | T | T |
| 0.0884574590553676 | 0.6229242575054447 | 0.2233598647724273 | T | T | T |
| 0.1389618537567721 | 0.7621038521519414 | 0.1966330931067366 | T | T | T |
| 0.2199237533256605 | 0.6426673157758584 | 0.2646765625495209 | T | T | T |
| 0.0622782960248592 | 0.6241863883289649 | 0.2567493089304795 | T | T | T |

Structure22

\*OCHCHOHO

1.0000000000000000

|                     |                     |                     |
|---------------------|---------------------|---------------------|
| 14.7840003966999998 | 0.0000000000000000  | 0.0000000000000000  |
| -7.3920001983999999 | 12.8033199130999993 | 0.0000000000000000  |
| 0.0000000000000000  | 0.0000000000000000  | 26.7110004425000014 |

|    |   |    |   |   |
|----|---|----|---|---|
| Cu | N | C  | O | H |
| 4  | 9 | 64 | 3 | 3 |

Selective dynamics

Direct

|                    |                    |                    |   |   |   |
|--------------------|--------------------|--------------------|---|---|---|
| 0.3883999883824316 | 0.6109899878387068 | 0.1237199976883616 | F | F | F |
| 0.4441495740063037 | 0.5761256500833661 | 0.1989578513160357 | T | T | T |
| 0.2759479386565185 | 0.5640557724887877 | 0.1970247351990492 | T | T | T |
| 0.4290854362740009 | 0.7300187170012036 | 0.1967899119074001 | T | T | T |
| 0.3273999989159151 | 0.6724299788206594 | 0.0770300030666817 | F | F | F |
| 0.3273600042078257 | 0.4895400106801233 | 0.0762199982880674 | F | F | F |
| 0.5102499723826810 | 0.6724500060481091 | 0.0761599987757577 | F | F | F |
| 0.9996700287274507 | 0.0001800000324650 | 0.0573600009216477 | F | F | F |
| 0.0003299999634265 | 0.3344300090962307 | 0.0625099986649431 | F | F | F |
| 0.9996899962509573 | 0.6666100025562471 | 0.0586999989901287 | F | F | F |
| 0.3332400024166660 | 0.0001599999854633 | 0.0586900003380535 | F | F | F |
| 0.6654199958038518 | 0.9995099902101501 | 0.0625599995251847 | F | F | F |
| 0.6666899919723832 | 0.3331600129459886 | 0.0612300001087860 | F | F | F |
| 0.3321700096157301 | 0.3312500119332853 | 0.0634699985367249 | F | F | F |
| 0.6686199903697627 | 0.6676899790852886 | 0.0635500028781806 | F | F | F |
| 0.9991999865008054 | 0.1663299948336885 | 0.0593199990547291 | F | F | F |
| 0.0001500000141448 | 0.5002700090658863 | 0.0620899982600847 | F | F | F |
| 0.9999099969734431 | 0.8333100080615523 | 0.0571499988286135 | F | F | F |
| 0.3328500091896487 | 0.1653199940614059 | 0.0589599981996258 | F | F | F |
| 0.3319799900125986 | 0.8348799943726348 | 0.0628399997826108 | F | F | F |
| 0.6658499836809995 | 0.1663399934903538 | 0.0614599995434091 | F | F | F |
| 0.6657000184196491 | 0.4994199871907909 | 0.0623999982923920 | F | F | F |
| 0.6680499911019240 | 0.8350800275685089 | 0.0631899982792987 | F | F | F |
| 0.1665399968694743 | 0.9999399781380731 | 0.0571300014870246 | F | F | F |
| 0.1647700071264779 | 0.3318099975501880 | 0.0630899965588227 | F | F | F |
| 0.1649599969669993 | 0.6678699851318157 | 0.0628300011305356 | F | F | F |
| 0.4995799959066858 | 0.9996899962566772 | 0.0621200017787373 | F | F | F |



|                    |                    |                    |   |   |   |
|--------------------|--------------------|--------------------|---|---|---|
| 0.5004400015054742 | 0.3341600000654878 | 0.0623699985549493 | F | F | F |
| 0.8335300087518434 | 0.0006599999888621 | 0.0593699999149706 | F | F | F |
| 0.8335000276869380 | 0.3339900076717370 | 0.0614399984580416 | F | F | F |
| 0.8345299959310495 | 0.6670100092759697 | 0.0590099990224289 | F | F | F |
| 0.1655199974769772 | 0.1649699956211279 | 0.0588000007106046 | F | F | F |
| 0.1689099967855014 | 0.5010300278786701 | 0.0695900022914344 | F | F | F |
| 0.1661600023717327 | 0.8336899876319350 | 0.0583200007559981 | F | F | F |
| 0.5000299811505329 | 0.1666100025210966 | 0.0600900016626156 | F | F | F |
| 0.4982599914069894 | 0.5016000270702463 | 0.0694800019188762 | F | F | F |
| 0.4988099932978187 | 0.8309299945801385 | 0.0696299970120435 | F | F | F |
| 0.8332399726153312 | 0.1666100025210966 | 0.0610099993636766 | F | F | F |
| 0.8332399726178181 | 0.4998199939886163 | 0.0600900016626156 | F | F | F |
| 0.8348900079967692 | 0.8343399763111563 | 0.0588699989124351 | F | F | F |
| 0.0547900013529556 | 0.1105799972670667 | 0.0582499988478276 | F | F | F |
| 0.0574500001527696 | 0.4450300037547379 | 0.0647099986659398 | F | F | F |
| 0.0552599988734528 | 0.7778099775364282 | 0.0577500015516321 | F | F | F |
| 0.3890799879994375 | 0.1110199987696632 | 0.0590200014557141 | F | F | F |
| 0.3847500086142546 | 0.4413599968097515 | 0.0698899999278808 | F | F | F |
| 0.3856300115637481 | 0.7774099707386029 | 0.0697999968969185 | F | F | F |
| 0.7216899990961423 | 0.1110199987696632 | 0.0616299994282770 | F | F | F |
| 0.7213600277433585 | 0.4436900019336107 | 0.0609799995887954 | F | F | F |
| 0.7239000201781849 | 0.7793800235195363 | 0.0617300011113215 | F | F | F |
| 0.0548500008969128 | 0.2779600024177142 | 0.0611100010467140 | F | F | F |
| 0.0548699982635696 | 0.6113299727824142 | 0.0609100013869721 | F | F | F |
| 0.0557399988174794 | 0.9441199898966843 | 0.0569700002542319 | F | F | F |
| 0.3894000053534441 | 0.2770200073944125 | 0.0612200014192723 | F | F | F |
| 0.3885200023536157 | 0.9449700116936768 | 0.0609200000764787 | F | F | F |
| 0.7219600081768291 | 0.2778800130081720 | 0.0612899996210956 | F | F | F |
| 0.7228400111134903 | 0.6104599833518947 | 0.0612800009690204 | F | F | F |
| 0.7218999862732431 | 0.9449999928237744 | 0.0611900016818296 | F | F | F |
| 0.2224700004002287 | 0.1112700029890163 | 0.0579399988155274 | F | F | F |
| 0.2239000052058842 | 0.4420799910817479 | 0.0698800012383671 | F | F | F |
| 0.2217099964610867 | 0.7781400084212819 | 0.0611599981631770 | F | F | F |
| 0.5554500222519394 | 0.1106600016727199 | 0.0609599985034350 | F | F | F |
| 0.5538799763018645 | 0.4459800124308089 | 0.0648500025197052 | F | F | F |
| 0.5577600002220393 | 0.7759199738370555 | 0.0699200034090950 | F | F | F |
| 0.8886299729346163 | 0.1112200022076308 | 0.0597000010326383 | F | F | F |
| 0.8891900181671417 | 0.4444000124669500 | 0.0609400011618462 | F | F | F |
| 0.8885800242332564 | 0.7773900031831715 | 0.0579899996383304 | F | F | F |
| 0.2204699963058161 | 0.2759700119173587 | 0.0616400018241308 | F | F | F |
| 0.2224200070404621 | 0.6142200231952089 | 0.0697799995553297 | F | F | F |
| 0.2220399975825629 | 0.9445899725293785 | 0.0577399991557783 | F | F | F |
| 0.5561599731237834 | 0.2784900069045193 | 0.0609700009367202 | F | F | F |
| 0.5584899783382440 | 0.6151199936777303 | 0.0699099972694697 | F | F | F |

|                    |                    |                    |   |   |   |
|--------------------|--------------------|--------------------|---|---|---|
| 0.5548200011515050 | 0.9423800111137410 | 0.0647599995261743 | F | F | F |
| 0.8888199925564066 | 0.2781499922028985 | 0.0615999996534029 | F | F | F |
| 0.8888300061197185 | 0.6107800006620749 | 0.0590399987973029 | F | F | F |
| 0.8892800212255736 | 0.9450600147559953 | 0.0582900010185554 | F | F | F |
| 0.2845393901339313 | 0.7818685805609882 | 0.2356629221759757 | T | T | T |
| 0.2277085574008972 | 0.6806522096810924 | 0.2660941632428289 | T | T | T |
| 0.2366245467870048 | 0.7699002675569495 | 0.1878424530795755 | T | T | T |
| 0.3885632671523415 | 0.8105081023492763 | 0.2349111678434690 | T | T | T |
| 0.2040174691981390 | 0.5915448522424742 | 0.2508895500717461 | T | T | T |
| 0.2507980092895608 | 0.7213782110080585 | 0.1688570678955630 | T | T | T |
| 0.2109859001959498 | 0.6876861665312267 | 0.3059299998217750 | T | T | T |
| 0.2732949146807028 | 0.8420772748574330 | 0.2547623135914960 | T | T | T |

### Structure23

#### CH<sub>2</sub>OHCOHO\*

1.0000000000000000

|                     |                     |                     |
|---------------------|---------------------|---------------------|
| 14.7840003966999998 | 0.0000000000000000  | 0.0000000000000000  |
| -7.3920001983999999 | 12.8033199130999993 | 0.0000000000000000  |
| 0.0000000000000000  | 0.0000000000000000  | 26.7110004425000014 |

|    |   |    |   |   |
|----|---|----|---|---|
| Cu | N | C  | O | H |
| 4  | 9 | 64 | 3 | 4 |

Selective dynamics

Direct

|                    |                    |                    |   |   |   |
|--------------------|--------------------|--------------------|---|---|---|
| 0.3883999883824316 | 0.6109899878387068 | 0.1237199976883616 | F | F | F |
| 0.4711524657654217 | 0.6248629274786374 | 0.2021768639024163 | T | T | T |
| 0.2778781715024806 | 0.5279156239178041 | 0.1949030725276964 | T | T | T |
| 0.3779694237804416 | 0.7136871799478038 | 0.1926886985867140 | T | T | T |
| 0.3273999989159151 | 0.6724299788206594 | 0.0770300030666817 | F | F | F |
| 0.3273600042078257 | 0.4895400106801233 | 0.0762199982880674 | F | F | F |
| 0.5102499723826810 | 0.6724500060481091 | 0.0761599987757577 | F | F | F |
| 0.9996700287274507 | 0.0001800000324650 | 0.0573600009216477 | F | F | F |
| 0.0003299999634265 | 0.3344300090962307 | 0.0625099986649431 | F | F | F |
| 0.9996899962509573 | 0.6666100025562471 | 0.0586999989901287 | F | F | F |
| 0.3332400024166660 | 0.0001599999854633 | 0.0586900003380535 | F | F | F |
| 0.6654199958038518 | 0.9995099902101501 | 0.0625599995251847 | F | F | F |
| 0.6666899919723832 | 0.3331600129459886 | 0.0612300001087860 | F | F | F |
| 0.3321700096157301 | 0.3312500119332853 | 0.0634699985367249 | F | F | F |
| 0.6686199903697627 | 0.6676899790852886 | 0.0635500028781806 | F | F | F |
| 0.9991999865008054 | 0.1663299948336885 | 0.0593199990547291 | F | F | F |
| 0.0001500000141448 | 0.5002700090658863 | 0.0620899982600847 | F | F | F |
| 0.9999099969734431 | 0.8333100080615523 | 0.0571499988286135 | F | F | F |
| 0.3328500091896487 | 0.1653199940614059 | 0.0589599981996258 | F | F | F |
| 0.3319799900125986 | 0.8348799943726348 | 0.0628399997826108 | F | F | F |
| 0.6658499836809995 | 0.1663399934903538 | 0.0614599995434091 | F | F | F |

|                    |                    |                    |   |   |   |
|--------------------|--------------------|--------------------|---|---|---|
| 0.6657000184196491 | 0.4994199871907909 | 0.0623999982923920 | F | F | F |
| 0.6680499911019240 | 0.8350800275685089 | 0.0631899982792987 | F | F | F |
| 0.1665399968694743 | 0.9999399781380731 | 0.0571300014870246 | F | F | F |
| 0.1647700071264779 | 0.3318099975501880 | 0.0630899965588227 | F | F | F |
| 0.1649599969669993 | 0.6678699851318157 | 0.0628300011305356 | F | F | F |
| 0.4995799959066858 | 0.9996899962566772 | 0.0621200017787373 | F | F | F |
| 0.5004400015054742 | 0.3341600000654878 | 0.0623699985549493 | F | F | F |
| 0.8335300087518434 | 0.0006599999888621 | 0.0593699999149706 | F | F | F |
| 0.8335000276869380 | 0.3339900076717370 | 0.0614399984580416 | F | F | F |
| 0.8345299959310495 | 0.6670100092759697 | 0.0590099990224289 | F | F | F |
| 0.1655199974769772 | 0.1649699956211279 | 0.0588000007106046 | F | F | F |
| 0.1689099967855014 | 0.5010300278786701 | 0.0695900022914344 | F | F | F |
| 0.1661600023717327 | 0.8336899876319350 | 0.0583200007559981 | F | F | F |
| 0.5000299811505329 | 0.1666100025210966 | 0.0600900016626156 | F | F | F |
| 0.4982599914069894 | 0.5016000270702463 | 0.0694800019188762 | F | F | F |
| 0.4988099932978187 | 0.8309299945801385 | 0.0696299970120435 | F | F | F |
| 0.8332399726153312 | 0.1666100025210966 | 0.0610099993636766 | F | F | F |
| 0.8332399726178181 | 0.4998199939886163 | 0.0600900016626156 | F | F | F |
| 0.8348900079967692 | 0.8343399763111563 | 0.0588699989124351 | F | F | F |
| 0.0547900013529556 | 0.1105799972670667 | 0.0582499988478276 | F | F | F |
| 0.0574500001527696 | 0.4450300037547379 | 0.0647099986659398 | F | F | F |
| 0.0552599988734528 | 0.7778099775364282 | 0.0577500015516321 | F | F | F |
| 0.3890799879994375 | 0.1110199987696632 | 0.0590200014557141 | F | F | F |
| 0.3847500086142546 | 0.4413599968097515 | 0.0698899999278808 | F | F | F |
| 0.3856300115637481 | 0.7774099707386029 | 0.0697999968969185 | F | F | F |
| 0.7216899990961423 | 0.1110199987696632 | 0.0616299994282770 | F | F | F |
| 0.7213600277433585 | 0.4436900019336107 | 0.0609799995887954 | F | F | F |
| 0.7239000201781849 | 0.7793800235195363 | 0.0617300011113215 | F | F | F |
| 0.0548500008969128 | 0.2779600024177142 | 0.0611100010467140 | F | F | F |
| 0.0548699982635696 | 0.6113299727824142 | 0.0609100013869721 | F | F | F |
| 0.0557399988174794 | 0.9441199898966843 | 0.0569700002542319 | F | F | F |
| 0.3894000053534441 | 0.2770200073944125 | 0.0612200014192723 | F | F | F |
| 0.3885200023536157 | 0.9449700116936768 | 0.0609200000764787 | F | F | F |
| 0.7219600081768291 | 0.2778800130081720 | 0.0612899996210956 | F | F | F |
| 0.7228400111134903 | 0.6104599833518947 | 0.0612800009690204 | F | F | F |
| 0.7218999862732431 | 0.9449999928237744 | 0.0611900016818296 | F | F | F |
| 0.2224700004002287 | 0.1112700029890163 | 0.0579399988155274 | F | F | F |
| 0.2239000052058842 | 0.4420799910817479 | 0.0698800012383671 | F | F | F |
| 0.2217099964610867 | 0.7781400084212819 | 0.0611599981631770 | F | F | F |
| 0.5554500222519394 | 0.1106600016727199 | 0.0609599985034350 | F | F | F |
| 0.5538799763018645 | 0.4459800124308089 | 0.0648500025197052 | F | F | F |
| 0.5577600002220393 | 0.7759199738370555 | 0.0699200034090950 | F | F | F |
| 0.8886299729346163 | 0.1112200022076308 | 0.0597000010326383 | F | F | F |
| 0.8891900181671417 | 0.4444000124669500 | 0.0609400011618462 | F | F | F |

|                    |                    |                    |   |   |   |
|--------------------|--------------------|--------------------|---|---|---|
| 0.8885800242332564 | 0.7773900031831715 | 0.0579899996383304 | F | F | F |
| 0.2204699963058161 | 0.2759700119173587 | 0.0616400018241308 | F | F | F |
| 0.2224200070404621 | 0.6142200231952089 | 0.0697799995553297 | F | F | F |
| 0.2220399975825629 | 0.9445899725293785 | 0.0577399991557783 | F | F | F |
| 0.5561599731237834 | 0.2784900069045193 | 0.0609700009367202 | F | F | F |
| 0.5584899783382440 | 0.6151199936777303 | 0.0699099972694697 | F | F | F |
| 0.5548200011515050 | 0.9423800111137410 | 0.0647599995261743 | F | F | F |
| 0.8888199925564066 | 0.2781499922028985 | 0.0615999996534029 | F | F | F |
| 0.8888300061197185 | 0.6107800006620749 | 0.0590399987973029 | F | F | F |
| 0.8892800212255736 | 0.9450600147559953 | 0.0582900010185554 | F | F | F |
| 0.2476925295040627 | 0.8037883316398658 | 0.2093907300221377 | T | T | T |
| 0.1593048066640053 | 0.7029830934517467 | 0.2299170774781802 | T | T | T |
| 0.2257987921727974 | 0.8790115568000855 | 0.1994697957951242 | T | T | T |
| 0.3365978729921634 | 0.8182473292636611 | 0.2013855240663857 | T | T | T |
| 0.0662746942088946 | 0.7100433491144170 | 0.2278366703425413 | T | T | T |
| 0.1510670748429322 | 0.8500743154043262 | 0.2078734187698840 | T | T | T |
| 0.1796593151478309 | 0.6930843635880195 | 0.2684908299721841 | T | T | T |
| 0.1541900574487102 | 0.6374363880824947 | 0.2074047406565155 | T | T | T |
| 0.0144289289895423 | 0.6608167673244191 | 0.2510291589259181 | T | T | T |

#### Structure24

HOCH<sub>2</sub>CO\*OH

1.0000000000000000

|                     |                     |                     |
|---------------------|---------------------|---------------------|
| 14.7840003966999998 | 0.0000000000000000  | 0.0000000000000000  |
| -7.3920001983999999 | 12.8033199130999993 | 0.0000000000000000  |
| 0.0000000000000000  | 0.0000000000000000  | 26.7110004425000014 |

|    |   |    |   |   |
|----|---|----|---|---|
| Cu | N | C  | O | H |
| 4  | 9 | 64 | 3 | 4 |

#### Selective dynamics

Direct

|                    |                    |                    |   |   |   |
|--------------------|--------------------|--------------------|---|---|---|
| 0.3883999883824316 | 0.6109899878387068 | 0.1237199976883616 | F | F | F |
| 0.4771578068964031 | 0.6234391113586617 | 0.2004272335182445 | T | T | T |
| 0.2824937380325295 | 0.5264255682423826 | 0.1959918928061018 | T | T | T |
| 0.3835377549378599 | 0.7114400783657649 | 0.1941258250461820 | T | T | T |
| 0.3273999989159151 | 0.6724299788206594 | 0.0770300030666817 | F | F | F |
| 0.3273600042078257 | 0.4895400106801233 | 0.0762199982880674 | F | F | F |
| 0.5102499723826810 | 0.6724500060481091 | 0.0761599987757577 | F | F | F |
| 0.9996700287274507 | 0.0001800000324650 | 0.0573600009216477 | F | F | F |
| 0.000329999634265  | 0.3344300090962307 | 0.0625099986649431 | F | F | F |
| 0.9996899962509573 | 0.6666100025562471 | 0.0586999989901287 | F | F | F |
| 0.3332400024166660 | 0.0001599999854633 | 0.0586900003380535 | F | F | F |
| 0.6654199958038518 | 0.9995099902101501 | 0.0625599995251847 | F | F | F |
| 0.6666899919723832 | 0.3331600129459886 | 0.0612300001087860 | F | F | F |
| 0.3321700096157301 | 0.3312500119332853 | 0.0634699985367249 | F | F | F |

|                    |                    |                    |   |   |   |
|--------------------|--------------------|--------------------|---|---|---|
| 0.6686199903697627 | 0.6676899790852886 | 0.0635500028781806 | F | F | F |
| 0.9991999865008054 | 0.1663299948336885 | 0.0593199990547291 | F | F | F |
| 0.0001500000141448 | 0.5002700090658863 | 0.0620899982600847 | F | F | F |
| 0.9999099969734431 | 0.8333100080615523 | 0.0571499988286135 | F | F | F |
| 0.3328500091896487 | 0.1653199940614059 | 0.0589599981996258 | F | F | F |
| 0.3319799900125986 | 0.8348799943726348 | 0.0628399997826108 | F | F | F |
| 0.6658499836809995 | 0.1663399934903538 | 0.0614599995434091 | F | F | F |
| 0.6657000184196491 | 0.4994199871907909 | 0.0623999982923920 | F | F | F |
| 0.6680499911019240 | 0.8350800275685089 | 0.0631899982792987 | F | F | F |
| 0.1665399968694743 | 0.9999399781380731 | 0.0571300014870246 | F | F | F |
| 0.1647700071264779 | 0.3318099975501880 | 0.0630899965588227 | F | F | F |
| 0.1649599969669993 | 0.6678699851318157 | 0.0628300011305356 | F | F | F |
| 0.4995799959066858 | 0.9996899962566772 | 0.0621200017787373 | F | F | F |
| 0.5004400015054742 | 0.3341600000654878 | 0.0623699985549493 | F | F | F |
| 0.8335300087518434 | 0.0006599999888621 | 0.0593699999149706 | F | F | F |
| 0.8335000276869380 | 0.3339900076717370 | 0.0614399984580416 | F | F | F |
| 0.8345299959310495 | 0.6670100092759697 | 0.0590099990224289 | F | F | F |
| 0.1655199974769772 | 0.1649699956211279 | 0.0588000007106046 | F | F | F |
| 0.1689099967855014 | 0.5010300278786701 | 0.0695900022914344 | F | F | F |
| 0.1661600023717327 | 0.8336899876319350 | 0.0583200007559981 | F | F | F |
| 0.5000299811505329 | 0.1666100025210966 | 0.0600900016626156 | F | F | F |
| 0.4982599914069894 | 0.5016000270702463 | 0.0694800019188762 | F | F | F |
| 0.4988099932978187 | 0.8309299945801385 | 0.0696299970120435 | F | F | F |
| 0.8332399726153312 | 0.1666100025210966 | 0.0610099993636766 | F | F | F |
| 0.8332399726178181 | 0.4998199939886163 | 0.0600900016626156 | F | F | F |
| 0.8348900079967692 | 0.8343399763111563 | 0.0588699989124351 | F | F | F |
| 0.0547900013529556 | 0.1105799972670667 | 0.0582499988478276 | F | F | F |
| 0.0574500001527696 | 0.4450300037547379 | 0.0647099986659398 | F | F | F |
| 0.0552599988734528 | 0.7778099775364282 | 0.0577500015516321 | F | F | F |
| 0.3890799879994375 | 0.1110199987696632 | 0.0590200014557141 | F | F | F |
| 0.3847500086142546 | 0.4413599968097515 | 0.0698899999278808 | F | F | F |
| 0.3856300115637481 | 0.7774099707386029 | 0.0697999968969185 | F | F | F |
| 0.7216899990961423 | 0.1110199987696632 | 0.0616299994282770 | F | F | F |
| 0.7213600277433585 | 0.4436900019336107 | 0.0609799995887954 | F | F | F |
| 0.7239000201781849 | 0.7793800235195363 | 0.0617300011113215 | F | F | F |
| 0.0548500008969128 | 0.2779600024177142 | 0.0611100010467140 | F | F | F |
| 0.0548699982635696 | 0.6113299727824142 | 0.0609100013869721 | F | F | F |
| 0.0557399988174794 | 0.9441199898966843 | 0.0569700002542319 | F | F | F |
| 0.3894000053534441 | 0.2770200073944125 | 0.0612200014192723 | F | F | F |
| 0.3885200023536157 | 0.9449700116936768 | 0.0609200000764787 | F | F | F |
| 0.7219600081768291 | 0.2778800130081720 | 0.0612899996210956 | F | F | F |
| 0.7228400111134903 | 0.6104599833518947 | 0.0612800009690204 | F | F | F |
| 0.7218999862732431 | 0.9449999928237744 | 0.0611900016818296 | F | F | F |
| 0.2224700004002287 | 0.1112700029890163 | 0.0579399988155274 | F | F | F |

|                    |                    |                    |   |   |   |
|--------------------|--------------------|--------------------|---|---|---|
| 0.2239000052058842 | 0.4420799910817479 | 0.0698800012383671 | F | F | F |
| 0.2217099964610867 | 0.7781400084212819 | 0.0611599981631770 | F | F | F |
| 0.5554500222519394 | 0.1106600016727199 | 0.0609599985034350 | F | F | F |
| 0.5538799763018645 | 0.4459800124308089 | 0.0648500025197052 | F | F | F |
| 0.5577600002220393 | 0.7759199738370555 | 0.0699200034090950 | F | F | F |
| 0.8886299729346163 | 0.1112200022076308 | 0.0597000010326383 | F | F | F |
| 0.8891900181671417 | 0.4444000124669500 | 0.0609400011618462 | F | F | F |
| 0.8885800242332564 | 0.7773900031831715 | 0.0579899996383304 | F | F | F |
| 0.2204699963058161 | 0.2759700119173587 | 0.0616400018241308 | F | F | F |
| 0.2224200070404621 | 0.6142200231952089 | 0.0697799995553297 | F | F | F |
| 0.2220399975825629 | 0.9445899725293785 | 0.0577399991557783 | F | F | F |
| 0.5561599731237834 | 0.2784900069045193 | 0.0609700009367202 | F | F | F |
| 0.5584899783382440 | 0.6151199936777303 | 0.0699099972694697 | F | F | F |
| 0.5548200011515050 | 0.9423800111137410 | 0.0647599995261743 | F | F | F |
| 0.8888199925564066 | 0.2781499922028985 | 0.0615999996534029 | F | F | F |
| 0.8888300061197185 | 0.6107800006620749 | 0.0590399987973029 | F | F | F |
| 0.8892800212255736 | 0.9450600147559953 | 0.0582900010185554 | F | F | F |
| 0.2479931956048037 | 0.8157874171044524 | 0.2057224119093103 | T | T | T |
| 0.1647166973041319 | 0.7120378626438947 | 0.2254152847918096 | T | T | T |
| 0.2346247518171990 | 0.8862991075901155 | 0.1916927080960098 | T | T | T |
| 0.3471471455620938 | 0.8261700161744010 | 0.2049266911063777 | T | T | T |
| 0.0654825491933628 | 0.7034876213666738 | 0.2234272890137342 | T | T | T |
| 0.0756893993124413 | 0.7705461860833497 | 0.2114741201611257 | T | T | T |
| 0.1857362859504574 | 0.7036232407806591 | 0.2642292233634257 | T | T | T |
| 0.1666904147604439 | 0.6490371493477126 | 0.2035847039417632 | T | T | T |
| 0.3951014682543810 | 0.8952005876879200 | 0.1907104363327685 | T | T | T |

#### Structure25

HOCH<sub>2</sub>CHOO\*

1.0000000000000000

|                     |                     |                     |
|---------------------|---------------------|---------------------|
| 14.7840003966999998 | 0.0000000000000000  | 0.0000000000000000  |
| -7.3920001983999999 | 12.8033199130999993 | 0.0000000000000000  |
| 0.0000000000000000  | 0.0000000000000000  | 26.7110004425000014 |

| Cu | N | C  | O | H |
|----|---|----|---|---|
| 4  | 9 | 64 | 3 | 4 |

#### Selective dynamics

Direct

|                    |                    |                    |   |   |   |
|--------------------|--------------------|--------------------|---|---|---|
| 0.3883999883824316 | 0.6109899878387068 | 0.1237199976883616 | F | F | F |
| 0.4439989793630489 | 0.6064180590942303 | 0.2059261571578168 | T | T | T |
| 0.2701969719268145 | 0.5753908308211158 | 0.1940032564681583 | T | T | T |
| 0.4095148807132905 | 0.7449670686211255 | 0.1885268695657492 | T | T | T |
| 0.3273999989159151 | 0.6724299788206594 | 0.0770300030666817 | F | F | F |
| 0.3273600042078257 | 0.4895400106801233 | 0.0762199982880674 | F | F | F |
| 0.5102499723826810 | 0.6724500060481091 | 0.0761599987757577 | F | F | F |

|                    |                    |                    |   |   |   |
|--------------------|--------------------|--------------------|---|---|---|
| 0.9996700287274507 | 0.0001800000324650 | 0.0573600009216477 | F | F | F |
| 0.0003299999634265 | 0.3344300090962307 | 0.0625099986649431 | F | F | F |
| 0.9996899962509573 | 0.6666100025562471 | 0.0586999989901287 | F | F | F |
| 0.3332400024166660 | 0.0001599999854633 | 0.0586900003380535 | F | F | F |
| 0.6654199958038518 | 0.9995099902101501 | 0.0625599995251847 | F | F | F |
| 0.6666899919723832 | 0.3331600129459886 | 0.0612300001087860 | F | F | F |
| 0.3321700096157301 | 0.3312500119332853 | 0.0634699985367249 | F | F | F |
| 0.6686199903697627 | 0.6676899790852886 | 0.0635500028781806 | F | F | F |
| 0.9991999865008054 | 0.1663299948336885 | 0.0593199990547291 | F | F | F |
| 0.0001500000141448 | 0.5002700090658863 | 0.0620899982600847 | F | F | F |
| 0.9999099969734431 | 0.8333100080615523 | 0.0571499988286135 | F | F | F |
| 0.3328500091896487 | 0.1653199940614059 | 0.0589599981996258 | F | F | F |
| 0.3319799900125986 | 0.8348799943726348 | 0.0628399997826108 | F | F | F |
| 0.6658499836809995 | 0.1663399934903538 | 0.0614599995434091 | F | F | F |
| 0.6657000184196491 | 0.4994199871907909 | 0.0623999982923920 | F | F | F |
| 0.6680499911019240 | 0.8350800275685089 | 0.0631899982792987 | F | F | F |
| 0.1665399968694743 | 0.9999399781380731 | 0.0571300014870246 | F | F | F |
| 0.1647700071264779 | 0.3318099975501880 | 0.0630899965588227 | F | F | F |
| 0.1649599969669993 | 0.6678699851318157 | 0.0628300011305356 | F | F | F |
| 0.4995799959066858 | 0.9996899962566772 | 0.0621200017787373 | F | F | F |
| 0.5004400015054742 | 0.3341600000654878 | 0.0623699985549493 | F | F | F |
| 0.8335300087518434 | 0.0006599999888621 | 0.0593699999149706 | F | F | F |
| 0.8335000276869380 | 0.3339900076717370 | 0.0614399984580416 | F | F | F |
| 0.8345299959310495 | 0.6670100092759697 | 0.0590099990224289 | F | F | F |
| 0.1655199974769772 | 0.1649699956211279 | 0.0588000007106046 | F | F | F |
| 0.1689099967855014 | 0.5010300278786701 | 0.0695900022914344 | F | F | F |
| 0.1661600023717327 | 0.8336899876319350 | 0.0583200007559981 | F | F | F |
| 0.5000299811505329 | 0.1666100025210966 | 0.0600900016626156 | F | F | F |
| 0.4982599914069894 | 0.5016000270702463 | 0.0694800019188762 | F | F | F |
| 0.4988099932978187 | 0.8309299945801385 | 0.0696299970120435 | F | F | F |
| 0.8332399726153312 | 0.1666100025210966 | 0.0610099993636766 | F | F | F |
| 0.8332399726178181 | 0.4998199939886163 | 0.0600900016626156 | F | F | F |
| 0.8348900079967692 | 0.8343399763111563 | 0.0588699989124351 | F | F | F |
| 0.0547900013529556 | 0.1105799972670667 | 0.0582499988478276 | F | F | F |
| 0.0574500001527696 | 0.4450300037547379 | 0.0647099986659398 | F | F | F |
| 0.0552599988734528 | 0.7778099775364282 | 0.0577500015516321 | F | F | F |
| 0.3890799879994375 | 0.1110199987696632 | 0.0590200014557141 | F | F | F |
| 0.3847500086142546 | 0.4413599968097515 | 0.0698899999278808 | F | F | F |
| 0.3856300115637481 | 0.7774099707386029 | 0.0697999968969185 | F | F | F |
| 0.7216899990961423 | 0.1110199987696632 | 0.0616299994282770 | F | F | F |
| 0.7213600277433585 | 0.4436900019336107 | 0.0609799995887954 | F | F | F |
| 0.7239000201781849 | 0.7793800235195363 | 0.0617300011113215 | F | F | F |
| 0.0548500008969128 | 0.2779600024177142 | 0.0611100010467140 | F | F | F |
| 0.0548699982635696 | 0.6113299727824142 | 0.0609100013869721 | F | F | F |

|                    |                    |                    |   |   |   |
|--------------------|--------------------|--------------------|---|---|---|
| 0.0557399988174794 | 0.9441199898966843 | 0.0569700002542319 | F | F | F |
| 0.3894000053534441 | 0.2770200073944125 | 0.0612200014192723 | F | F | F |
| 0.3885200023536157 | 0.9449700116936768 | 0.0609200000764787 | F | F | F |
| 0.7219600081768291 | 0.2778800130081720 | 0.0612899996210956 | F | F | F |
| 0.7228400111134903 | 0.6104599833518947 | 0.0612800009690204 | F | F | F |
| 0.7218999862732431 | 0.9449999928237744 | 0.0611900016818296 | F | F | F |
| 0.2224700004002287 | 0.1112700029890163 | 0.0579399988155274 | F | F | F |
| 0.2239000052058842 | 0.4420799910817479 | 0.0698800012383671 | F | F | F |
| 0.2217099964610867 | 0.7781400084212819 | 0.0611599981631770 | F | F | F |
| 0.5554500222519394 | 0.1106600016727199 | 0.0609599985034350 | F | F | F |
| 0.5538799763018645 | 0.4459800124308089 | 0.0648500025197052 | F | F | F |
| 0.5577600002220393 | 0.7759199738370555 | 0.0699200034090950 | F | F | F |
| 0.8886299729346163 | 0.1112200022076308 | 0.0597000010326383 | F | F | F |
| 0.8891900181671417 | 0.4444000124669500 | 0.0609400011618462 | F | F | F |
| 0.8885800242332564 | 0.7773900031831715 | 0.0579899996383304 | F | F | F |
| 0.2204699963058161 | 0.2759700119173587 | 0.0616400018241308 | F | F | F |
| 0.2224200070404621 | 0.6142200231952089 | 0.0697799995553297 | F | F | F |
| 0.2220399975825629 | 0.9445899725293785 | 0.0577399991557783 | F | F | F |
| 0.5561599731237834 | 0.2784900069045193 | 0.0609700009367202 | F | F | F |
| 0.5584899783382440 | 0.6151199936777303 | 0.0699099972694697 | F | F | F |
| 0.5548200011515050 | 0.9423800111137410 | 0.0647599995261743 | F | F | F |
| 0.8888199925564066 | 0.2781499922028985 | 0.0615999996534029 | F | F | F |
| 0.8888300061197185 | 0.6107800006620749 | 0.0590399987973029 | F | F | F |
| 0.8892800212255736 | 0.9450600147559953 | 0.0582900010185554 | F | F | F |
| 0.2678461346140633 | 0.8235413371131401 | 0.2001102386970959 | T | T | T |
| 0.1905572723623730 | 0.7159259531705870 | 0.2265524981686125 | T | T | T |
| 0.2200932540700571 | 0.8287593597171333 | 0.1577528439834982 | T | T | T |
| 0.3700907506272788 | 0.8423819716286459 | 0.1955356559335718 | T | T | T |
| 0.0890872416918576 | 0.6942451332062318 | 0.2178056932429767 | T | T | T |
| 0.1027121948377671 | 0.7377493871747126 | 0.1864191333338881 | T | T | T |
| 0.2054189594541827 | 0.7128115415342395 | 0.2666966273015338 | T | T | T |
| 0.2072204277359728 | 0.6551932700133619 | 0.2065295221394857 | T | T | T |
| 0.2722875029405160 | 0.8830253820340156 | 0.2280187282856667 | T | T | T |

Structure26

CH<sub>3</sub>OH+\*OCO

1.0000000000000000

|                     |                     |                     |
|---------------------|---------------------|---------------------|
| 14.7840003966999998 | 0.0000000000000000  | 0.0000000000000000  |
| -7.3920001983999999 | 12.8033199130999993 | 0.0000000000000000  |
| 0.0000000000000000  | 0.0000000000000000  | 26.7110004425000014 |

| Cu | N | C  | O | H |
|----|---|----|---|---|
| 4  | 9 | 64 | 3 | 4 |

Selective dynamics

Direct



|                    |                    |                    |   |   |   |
|--------------------|--------------------|--------------------|---|---|---|
| 0.3881900012654427 | 0.6059700250918354 | 0.1243999973027243 | F | F | F |
| 0.4714620304639258 | 0.6018762380710464 | 0.2004878574503819 | T | T | T |
| 0.2796638135907770 | 0.5380300372684276 | 0.1975422656617482 | T | T | T |
| 0.4066631051358789 | 0.7174421023872454 | 0.1940331744621729 | T | T | T |
| 0.3271900117312896 | 0.6674100160737950 | 0.0777100026436059 | F | F | F |
| 0.3271499871871910 | 0.4845199882612334 | 0.0768999979024301 | F | F | F |
| 0.5100399851915896 | 0.6674299836292192 | 0.0768399983526749 | F | F | F |
| 0.9994599819312597 | 0.9951599836198284 | 0.0580400004985719 | F | F | F |
| 0.0001200000273016 | 0.3294099867554436 | 0.0631899982792987 | F | F | F |
| 0.9994800090598659 | 0.6615899801373502 | 0.0593799986044843 | F | F | F |
| 0.3330299853944041 | 0.9951400160644042 | 0.0593699999149706 | F | F | F |
| 0.6652100086192263 | 0.9944900274632786 | 0.0632399991021018 | F | F | F |
| 0.6664800048203432 | 0.3281399906052016 | 0.0619099996857031 | F | F | F |
| 0.3319599926627319 | 0.3262299895143883 | 0.0641499981136491 | F | F | F |
| 0.6684100031460858 | 0.6626700162603143 | 0.0642300024551048 | F | F | F |
| 0.9989899993077103 | 0.1613100021727050 | 0.0599999986690847 | F | F | F |
| 0.9999399781436722 | 0.4952499866469964 | 0.0627700015807804 | F | F | F |
| 0.9997000098499953 | 0.8282899856426624 | 0.0578299984429691 | F | F | F |
| 0.3326399922060688 | 0.1603000014785252 | 0.0596400015203216 | F | F | F |
| 0.3317700028605586 | 0.8298599720318478 | 0.0635199993969664 | F | F | F |
| 0.6656399965269628 | 0.1613200009074731 | 0.0621399991203262 | F | F | F |
| 0.6654899716065188 | 0.4943999946079103 | 0.0630799979067476 | F | F | F |
| 0.6678400040175276 | 0.8300600052277218 | 0.0638699978562229 | F | F | F |
| 0.1663299947648440 | 0.9949200153131059 | 0.0578100010639488 | F | F | F |
| 0.1645600050914879 | 0.3267900049673074 | 0.0637700036232900 | F | F | F |
| 0.1647499948623761 | 0.6628500223068414 | 0.0635100007074527 | F | F | F |
| 0.4993700087155943 | 0.9946699738377873 | 0.0627999976118829 | F | F | F |
| 0.5002300143514304 | 0.3291400074826143 | 0.0630500018756450 | F | F | F |
| 0.8333200216341652 | 0.9956399798271960 | 0.0600499994918877 | F | F | F |
| 0.8332899809043965 | 0.3289699852528472 | 0.0621200017787373 | F | F | F |
| 0.8343200087790095 | 0.6619899869351826 | 0.0596899986367845 | F | F | F |
| 0.1653099954419872 | 0.1599500030382472 | 0.0594800002875289 | F | F | F |
| 0.1686999946458201 | 0.4960100054597802 | 0.0702700019057900 | F | F | F |
| 0.1659500003061538 | 0.8286700248850636 | 0.0590000003703537 | F | F | F |
| 0.4998199939779653 | 0.1615899950202078 | 0.0607700012769783 | F | F | F |
| 0.4980500042549494 | 0.4965800047294593 | 0.0701600015332318 | F | F | F |
| 0.4986000061067273 | 0.8259099721612486 | 0.0703099965889677 | F | F | F |
| 0.8330299854427636 | 0.1615899950202078 | 0.0616899989405937 | F | F | F |
| 0.8330299854637815 | 0.4948000014057357 | 0.0607700012769783 | F | F | F |
| 0.8346800207730922 | 0.8293200134861820 | 0.0595499984893522 | F | F | F |
| 0.0545799993282259 | 0.1055599972642369 | 0.0589299984247518 | F | F | F |
| 0.0572400018380179 | 0.4400100111718572 | 0.0653899982428570 | F | F | F |
| 0.0550500005567045 | 0.7727900147114539 | 0.0584300011285492 | F | F | F |
| 0.3888700008556611 | 0.1059999987668334 | 0.0597000010326383 | F | F | F |

|                    |                    |                    |   |   |   |
|--------------------|--------------------|--------------------|---|---|---|
| 0.3845399916306746 | 0.4363400042268708 | 0.0705699995048050 | F | F | F |
| 0.3854199946172159 | 0.7723900079917314 | 0.0704799965112741 | F | F | F |
| 0.7214800119523659 | 0.1059999987668334 | 0.0623099990051941 | F | F | F |
| 0.7211499809978719 | 0.4386700093507301 | 0.0616599992031510 | F | F | F |
| 0.7236899733956434 | 0.7743600011006464 | 0.0624100007256772 | F | F | F |
| 0.0546399987942863 | 0.2729400098348336 | 0.0617900006610697 | F | F | F |
| 0.0546599998791706 | 0.6063100099574470 | 0.0615900010013277 | F | F | F |
| 0.0555300005007311 | 0.9391000270717100 | 0.0576499998685875 | F | F | F |
| 0.3891899883698571 | 0.2720000148115318 | 0.0619000010336279 | F | F | F |
| 0.3883099854396690 | 0.9399499893528898 | 0.0615999996534029 | F | F | F |
| 0.7217500209857377 | 0.2728599905892821 | 0.0619699992354583 | F | F | F |
| 0.7226300239574499 | 0.6054400205269204 | 0.0619600005459446 | F | F | F |
| 0.7216899991212031 | 0.9399799704829874 | 0.0618700012587539 | F | F | F |
| 0.2222599983078553 | 0.1062500029861866 | 0.0586199983924445 | F | F | F |
| 0.2236900031708942 | 0.4370599984988672 | 0.0705600008527298 | F | F | F |
| 0.2214999944280933 | 0.7731199860804949 | 0.0618400014838727 | F | F | F |
| 0.5552399754776616 | 0.1056400015917802 | 0.0616400018241308 | F | F | F |
| 0.5536699891107730 | 0.4409599900119190 | 0.0655300021340608 | F | F | F |
| 0.5575500131050575 | 0.7709000110901840 | 0.0706000029860192 | F | F | F |
| 0.8884199857517885 | 0.1062000021266982 | 0.0603800006095554 | F | F | F |
| 0.8889799714236517 | 0.4393799901261630 | 0.0616200007387633 | F | F | F |
| 0.8883699774897735 | 0.7723699808423845 | 0.0586699992526860 | F | F | F |
| 0.2202599942728227 | 0.2709499895765717 | 0.0623200014384864 | F | F | F |
| 0.2222100049007807 | 0.6092000007763190 | 0.0704599991322468 | F | F | F |
| 0.2218299955455691 | 0.9395700097044042 | 0.0584199987327025 | F | F | F |
| 0.5559499859697397 | 0.2734700143216386 | 0.0616500005136444 | F | F | F |
| 0.5582799911471525 | 0.6100999712588333 | 0.0705899968838253 | F | F | F |
| 0.5546100139604135 | 0.9373599886948512 | 0.0654399991030985 | F | F | F |
| 0.8886100054023700 | 0.2731299996200178 | 0.0622799992677585 | F | F | F |
| 0.8886200189676785 | 0.6057599783212879 | 0.0597199983742271 | F | F | F |
| 0.8890699744430322 | 0.9400399923371054 | 0.0589700005954796 | F | F | F |
| 0.3578712369424437 | 0.8949363358920945 | 0.2005700130872554 | T | T | T |
| 0.1125408297528828 | 0.6702334528230031 | 0.2496949193032740 | T | T | T |
| 0.3078764505038887 | 0.9344608404574340 | 0.1920261341198788 | T | T | T |
| 0.4081557270895421 | 0.8547636278507716 | 0.2095260554390026 | T | T | T |
| 0.0173215255278341 | 0.6654323944240351 | 0.2350530242364929 | T | T | T |
| 0.0330814561009221 | 0.7180420639780881 | 0.2095125483491372 | T | T | T |
| 0.0924388343855540 | 0.6105022253219869 | 0.2786730515551208 | T | T | T |
| 0.1504230806055113 | 0.6524491999830916 | 0.2184829313533601 | T | T | T |
| 0.1687303377898463 | 0.7468498681432297 | 0.2660374439874085 | T | T | T |

Structure27

CH<sub>3</sub>COO\*+H<sub>2</sub>O

1.0000000000000000

|                     |                     |                     |
|---------------------|---------------------|---------------------|
| 14.7840003966999998 | 0.0000000000000000  | 0.0000000000000000  |
| -7.3920001983999999 | 12.8033199130999993 | 0.0000000000000000  |
| 0.0000000000000000  | 0.0000000000000000  | 26.7110004425000014 |

|    |   |    |   |   |
|----|---|----|---|---|
| Cu | N | C  | O | H |
| 4  | 9 | 64 | 3 | 5 |

Selective dynamics

Direct

|                    |                    |                    |   |   |   |
|--------------------|--------------------|--------------------|---|---|---|
| 0.3883999883824316 | 0.6109899878387068 | 0.1237199976883616 | F | F | F |
| 0.4764118495982494 | 0.6380618695953797 | 0.2016253740275553 | T | T | T |
| 0.2925172462166464 | 0.5263812781366372 | 0.1975289337914915 | T | T | T |
| 0.3659273307517042 | 0.7107401020793481 | 0.1924139859537418 | T | T | T |
| 0.3273999989159151 | 0.6724299788206594 | 0.0770300030666817 | F | F | F |
| 0.3273600042078257 | 0.4895400106801233 | 0.0762199982880674 | F | F | F |
| 0.5102499723826810 | 0.6724500060481091 | 0.0761599987757577 | F | F | F |
| 0.9996700287274507 | 0.0001800000324650 | 0.0573600009216477 | F | F | F |
| 0.0003299999634265 | 0.3344300090962307 | 0.0625099986649431 | F | F | F |
| 0.9996899962509573 | 0.6666100025562471 | 0.0586999989901287 | F | F | F |
| 0.3332400024166660 | 0.0001599999854633 | 0.0586900003380535 | F | F | F |
| 0.6654199958038518 | 0.9995099902101501 | 0.0625599995251847 | F | F | F |
| 0.6666899919723832 | 0.3331600129459886 | 0.0612300001087860 | F | F | F |
| 0.3321700096157301 | 0.3312500119332853 | 0.0634699985367249 | F | F | F |
| 0.6686199903697627 | 0.6676899790852886 | 0.0635500028781806 | F | F | F |
| 0.9991999865008054 | 0.1663299948336885 | 0.0593199990547291 | F | F | F |
| 0.0001500000141448 | 0.5002700090658863 | 0.0620899982600847 | F | F | F |
| 0.9999099969734431 | 0.8333100080615523 | 0.0571499988286135 | F | F | F |
| 0.3328500091896487 | 0.1653199940614059 | 0.0589599981996258 | F | F | F |
| 0.3319799900125986 | 0.8348799943726348 | 0.0628399997826108 | F | F | F |
| 0.6658499836809995 | 0.1663399934903538 | 0.0614599995434091 | F | F | F |
| 0.6657000184196491 | 0.4994199871907909 | 0.0623999982923920 | F | F | F |
| 0.6680499911019240 | 0.8350800275685089 | 0.0631899982792987 | F | F | F |
| 0.1665399968694743 | 0.9999399781380731 | 0.0571300014870246 | F | F | F |
| 0.1647700071264779 | 0.3318099975501880 | 0.0630899965588227 | F | F | F |
| 0.1649599969669993 | 0.6678699851318157 | 0.0628300011305356 | F | F | F |
| 0.4995799959066858 | 0.9996899962566772 | 0.0621200017787373 | F | F | F |
| 0.5004400015054742 | 0.3341600000654878 | 0.0623699985549493 | F | F | F |
| 0.8335300087518434 | 0.0006599999888621 | 0.0593699999149706 | F | F | F |
| 0.8335000276869380 | 0.3339900076717370 | 0.0614399984580416 | F | F | F |
| 0.8345299959310495 | 0.6670100092759697 | 0.0590099990224289 | F | F | F |
| 0.1655199974769772 | 0.1649699956211279 | 0.0588000007106046 | F | F | F |
| 0.1689099967855014 | 0.5010300278786701 | 0.0695900022914344 | F | F | F |
| 0.1661600023717327 | 0.8336899876319350 | 0.0583200007559981 | F | F | F |
| 0.5000299811505329 | 0.1666100025210966 | 0.0600900016626156 | F | F | F |
| 0.4982599914069894 | 0.5016000270702463 | 0.0694800019188762 | F | F | F |
| 0.4988099932978187 | 0.8309299945801385 | 0.0696299970120435 | F | F | F |

|                     |                    |                    |   |   |   |
|---------------------|--------------------|--------------------|---|---|---|
| 0.8332399726153312  | 0.1666100025210966 | 0.0610099993636766 | F | F | F |
| 0.8332399726178181  | 0.4998199939886163 | 0.0600900016626156 | F | F | F |
| 0.8348900079967692  | 0.8343399763111563 | 0.0588699989124351 | F | F | F |
| 0.0547900013529556  | 0.1105799972670667 | 0.0582499988478276 | F | F | F |
| 0.0574500001527696  | 0.4450300037547379 | 0.0647099986659398 | F | F | F |
| 0.0552599988734528  | 0.7778099775364282 | 0.0577500015516321 | F | F | F |
| 0.3890799879994375  | 0.1110199987696632 | 0.0590200014557141 | F | F | F |
| 0.3847500086142546  | 0.4413599968097515 | 0.069889999278808  | F | F | F |
| 0.3856300115637481  | 0.7774099707386029 | 0.0697999968969185 | F | F | F |
| 0.7216899990961423  | 0.1110199987696632 | 0.0616299994282770 | F | F | F |
| 0.7213600277433585  | 0.4436900019336107 | 0.0609799995887954 | F | F | F |
| 0.7239000201781849  | 0.7793800235195363 | 0.0617300011113215 | F | F | F |
| 0.0548500008969128  | 0.2779600024177142 | 0.0611100010467140 | F | F | F |
| 0.0548699982635696  | 0.6113299727824142 | 0.0609100013869721 | F | F | F |
| 0.0557399988174794  | 0.9441199898966843 | 0.0569700002542319 | F | F | F |
| 0.3894000053534441  | 0.2770200073944125 | 0.0612200014192723 | F | F | F |
| 0.3885200023536157  | 0.9449700116936768 | 0.0609200000764787 | F | F | F |
| 0.7219600081768291  | 0.2778800130081720 | 0.0612899996210956 | F | F | F |
| 0.7228400111134903  | 0.6104599833518947 | 0.0612800009690204 | F | F | F |
| 0.7218999862732431  | 0.9449999928237744 | 0.0611900016818296 | F | F | F |
| 0.2224700004002287  | 0.1112700029890163 | 0.0579399988155274 | F | F | F |
| 0.2239000052058842  | 0.4420799910817479 | 0.0698800012383671 | F | F | F |
| 0.2217099964610867  | 0.7781400084212819 | 0.0611599981631770 | F | F | F |
| 0.5554500222519394  | 0.1106600016727199 | 0.0609599985034350 | F | F | F |
| 0.5538799763018645  | 0.4459800124308089 | 0.0648500025197052 | F | F | F |
| 0.5577600002220393  | 0.7759199738370555 | 0.0699200034090950 | F | F | F |
| 0.8886299729346163  | 0.1112200022076308 | 0.0597000010326383 | F | F | F |
| 0.8891900181671417  | 0.4444000124669500 | 0.0609400011618462 | F | F | F |
| 0.8885800242332564  | 0.7773900031831715 | 0.0579899996383304 | F | F | F |
| 0.2204699963058161  | 0.2759700119173587 | 0.0616400018241308 | F | F | F |
| 0.2224200070404621  | 0.6142200231952089 | 0.0697799995553297 | F | F | F |
| 0.2220399975825629  | 0.9445899725293785 | 0.0577399991557783 | F | F | F |
| 0.5561599731237834  | 0.2784900069045193 | 0.0609700009367202 | F | F | F |
| 0.5584899783382440  | 0.6151199936777303 | 0.0699099972694697 | F | F | F |
| 0.5548200011515050  | 0.9423800111137410 | 0.0647599995261743 | F | F | F |
| 0.8888199925564066  | 0.2781499922028985 | 0.0615999996534029 | F | F | F |
| 0.8888300061197185  | 0.6107800006620749 | 0.0590399987973029 | F | F | F |
| 0.8892800212255736  | 0.9450600147559953 | 0.0582900010185554 | F | F | F |
| 0.2390303808514098  | 0.8033807220689431 | 0.2101901809791510 | T | T | T |
| 0.1824413486368251  | 0.7257566465965596 | 0.2523382213096020 | T | T | T |
| 0.2026402565250490  | 0.8564613981521810 | 0.1921936310327256 | T | T | T |
| 0.3265696503894305  | 0.8120396692480850 | 0.1941704821271331 | T | T | T |
| -0.0082356235569018 | 0.7646978159242845 | 0.1779987507969880 | T | T | T |
| 0.0676648639153330  | 0.8018828134179992 | 0.1863067023909757 | T | T | T |

|                     |                    |                    |   |   |   |
|---------------------|--------------------|--------------------|---|---|---|
| 0.2378846570997827  | 0.7335372783383819 | 0.2817122735893008 | T | T | T |
| 0.1471363097875476  | 0.6457316588159933 | 0.2374937422154533 | T | T | T |
| -0.0414278566529305 | 0.7780799550195663 | 0.2061036940991791 | T | T | T |
| 0.1204607294010010  | 0.7369248174967316 | 0.2683688786266443 | T | T | T |

Structure28

\*CH<sub>2</sub>COHO+H<sub>2</sub>O

1.0000000000000000

|                     |                     |                     |
|---------------------|---------------------|---------------------|
| 14.7840003966999998 | 0.0000000000000000  | 0.0000000000000000  |
| -7.3920001983999999 | 12.8033199130999993 | 0.0000000000000000  |
| 0.0000000000000000  | 0.0000000000000000  | 26.7110004425000014 |

|    |   |    |   |   |
|----|---|----|---|---|
| Cu | N | C  | O | H |
| 4  | 9 | 64 | 3 | 5 |

Selective dynamics

Direct

|                    |                    |                    |   |   |   |
|--------------------|--------------------|--------------------|---|---|---|
| 0.3883999883824316 | 0.6109899878387068 | 0.1237199976883616 | F | F | F |
| 0.4798503564294138 | 0.6886879195531482 | 0.1989174548712853 | T | T | T |
| 0.3359810033960908 | 0.5187202735887192 | 0.2005003854406673 | T | T | T |
| 0.3065345397761070 | 0.6639590947067125 | 0.1946152216479018 | T | T | T |
| 0.3273999989159151 | 0.6724299788206594 | 0.0770300030666817 | F | F | F |
| 0.3273600042078257 | 0.4895400106801233 | 0.0762199982880674 | F | F | F |
| 0.5102499723826810 | 0.6724500060481091 | 0.0761599987757577 | F | F | F |
| 0.9996700287274507 | 0.0001800000324650 | 0.0573600009216477 | F | F | F |
| 0.0003299999634265 | 0.3344300090962307 | 0.0625099986649431 | F | F | F |
| 0.9996899962509573 | 0.6666100025562471 | 0.0586999989901287 | F | F | F |
| 0.3332400024166660 | 0.0001599999854633 | 0.0586900003380535 | F | F | F |
| 0.6654199958038518 | 0.9995099902101501 | 0.0625599995251847 | F | F | F |
| 0.6666899919723832 | 0.3331600129459886 | 0.0612300001087860 | F | F | F |
| 0.3321700096157301 | 0.3312500119332853 | 0.0634699985367249 | F | F | F |
| 0.6686199903697627 | 0.6676899790852886 | 0.0635500028781806 | F | F | F |
| 0.9991999865008054 | 0.1663299948336885 | 0.0593199990547291 | F | F | F |
| 0.0001500000141448 | 0.5002700090658863 | 0.0620899982600847 | F | F | F |
| 0.9999099969734431 | 0.8333100080615523 | 0.0571499988286135 | F | F | F |
| 0.3328500091896487 | 0.1653199940614059 | 0.0589599981996258 | F | F | F |
| 0.3319799900125986 | 0.8348799943726348 | 0.0628399997826108 | F | F | F |
| 0.6658499836809995 | 0.1663399934903538 | 0.0614599995434091 | F | F | F |
| 0.6657000184196491 | 0.4994199871907909 | 0.0623999982923920 | F | F | F |
| 0.6680499911019240 | 0.8350800275685089 | 0.0631899982792987 | F | F | F |
| 0.1665399968694743 | 0.9999399781380731 | 0.0571300014870246 | F | F | F |
| 0.1647700071264779 | 0.3318099975501880 | 0.0630899965588227 | F | F | F |
| 0.1649599969669993 | 0.6678699851318157 | 0.0628300011305356 | F | F | F |
| 0.4995799959066858 | 0.9996899962566772 | 0.0621200017787373 | F | F | F |
| 0.5004400015054742 | 0.3341600000654878 | 0.0623699985549493 | F | F | F |
| 0.8335300087518434 | 0.0006599999888621 | 0.0593699999149706 | F | F | F |

|                    |                    |                    |   |   |   |
|--------------------|--------------------|--------------------|---|---|---|
| 0.8335000276869380 | 0.3339900076717370 | 0.0614399984580416 | F | F | F |
| 0.8345299959310495 | 0.6670100092759697 | 0.0590099990224289 | F | F | F |
| 0.1655199974769772 | 0.1649699956211279 | 0.0588000007106046 | F | F | F |
| 0.1689099967855014 | 0.5010300278786701 | 0.0695900022914344 | F | F | F |
| 0.1661600023717327 | 0.8336899876319350 | 0.0583200007559981 | F | F | F |
| 0.5000299811505329 | 0.1666100025210966 | 0.0600900016626156 | F | F | F |
| 0.4982599914069894 | 0.5016000270702463 | 0.0694800019188762 | F | F | F |
| 0.4988099932978187 | 0.8309299945801385 | 0.0696299970120435 | F | F | F |
| 0.8332399726153312 | 0.1666100025210966 | 0.0610099993636766 | F | F | F |
| 0.8332399726178181 | 0.4998199939886163 | 0.0600900016626156 | F | F | F |
| 0.8348900079967692 | 0.8343399763111563 | 0.0588699989124351 | F | F | F |
| 0.0547900013529556 | 0.1105799972670667 | 0.0582499988478276 | F | F | F |
| 0.0574500001527696 | 0.4450300037547379 | 0.0647099986659398 | F | F | F |
| 0.0552599988734528 | 0.7778099775364282 | 0.0577500015516321 | F | F | F |
| 0.3890799879994375 | 0.1110199987696632 | 0.0590200014557141 | F | F | F |
| 0.3847500086142546 | 0.4413599968097515 | 0.0698899999278808 | F | F | F |
| 0.3856300115637481 | 0.7774099707386029 | 0.0697999968969185 | F | F | F |
| 0.7216899990961423 | 0.1110199987696632 | 0.0616299994282770 | F | F | F |
| 0.7213600277433585 | 0.4436900019336107 | 0.0609799995887954 | F | F | F |
| 0.7239000201781849 | 0.7793800235195363 | 0.0617300011113215 | F | F | F |
| 0.0548500008969128 | 0.2779600024177142 | 0.0611100010467140 | F | F | F |
| 0.0548699982635696 | 0.6113299727824142 | 0.0609100013869721 | F | F | F |
| 0.0557399988174794 | 0.9441199898966843 | 0.0569700002542319 | F | F | F |
| 0.3894000053534441 | 0.2770200073944125 | 0.0612200014192723 | F | F | F |
| 0.3885200023536157 | 0.9449700116936768 | 0.0609200000764787 | F | F | F |
| 0.7219600081768291 | 0.2778800130081720 | 0.0612899996210956 | F | F | F |
| 0.7228400111134903 | 0.6104599833518947 | 0.0612800009690204 | F | F | F |
| 0.7218999862732431 | 0.9449999928237744 | 0.0611900016818296 | F | F | F |
| 0.2224700004002287 | 0.1112700029890163 | 0.0579399988155274 | F | F | F |
| 0.2239000052058842 | 0.4420799910817479 | 0.0698800012383671 | F | F | F |
| 0.2217099964610867 | 0.7781400084212819 | 0.0611599981631770 | F | F | F |
| 0.5554500222519394 | 0.1106600016727199 | 0.0609599985034350 | F | F | F |
| 0.5538799763018645 | 0.4459800124308089 | 0.0648500025197052 | F | F | F |
| 0.5577600002220393 | 0.7759199738370555 | 0.0699200034090950 | F | F | F |
| 0.8886299729346163 | 0.1112200022076308 | 0.0597000010326383 | F | F | F |
| 0.8891900181671417 | 0.4444000124669500 | 0.0609400011618462 | F | F | F |
| 0.8885800242332564 | 0.7773900031831715 | 0.0579899996383304 | F | F | F |
| 0.2204699963058161 | 0.2759700119173587 | 0.0616400018241308 | F | F | F |
| 0.2224200070404621 | 0.6142200231952089 | 0.0697799995553297 | F | F | F |
| 0.2220399975825629 | 0.9445899725293785 | 0.0577399991557783 | F | F | F |
| 0.5561599731237834 | 0.2784900069045193 | 0.0609700009367202 | F | F | F |
| 0.5584899783382440 | 0.6151199936777303 | 0.0699099972694697 | F | F | F |
| 0.5548200011515050 | 0.9423800111137410 | 0.0647599995261743 | F | F | F |
| 0.8888199925564066 | 0.2781499922028985 | 0.0615999996534029 | F | F | F |

|                    |                    |                    |   |   |   |
|--------------------|--------------------|--------------------|---|---|---|
| 0.8888300061197185 | 0.6107800006620749 | 0.0590399987973029 | F | F | F |
| 0.8892800212255736 | 0.9450600147559953 | 0.0582900010185554 | F | F | F |
| 0.2710881254411933 | 0.8369601861178950 | 0.2025850278947823 | T | T | T |
| 0.2166683119385849 | 0.7203965070311650 | 0.2117691878815941 | T | T | T |
| 0.2195518378482971 | 0.8880105090417555 | 0.2170311520409834 | T | T | T |
| 0.3570696484702505 | 0.8884195025334175 | 0.1829376190564443 | T | T | T |
| 0.0151117206089740 | 0.7424407786333483 | 0.2483815375227542 | T | T | T |
| 0.1491378175853811 | 0.8376182064991889 | 0.2298680838966357 | T | T | T |
| 0.1900032486543680 | 0.7038236821583099 | 0.2511017899180853 | T | T | T |
| 0.1457914924541859 | 0.6821971624796993 | 0.1880386142173114 | T | T | T |
| 0.0222103911386755 | 0.6803814310326162 | 0.2491559828265125 | T | T | T |
| 0.0079343066244253 | 0.7480860326193995 | 0.2817422770749434 | T | T | T |

Structure29

HOCH<sub>2</sub>CHOHO

1.0000000000000000

|                     |                     |                     |
|---------------------|---------------------|---------------------|
| 14.7840003966999998 | 0.0000000000000000  | 0.0000000000000000  |
| -7.3920001983999999 | 12.8033199130999993 | 0.0000000000000000  |
| 0.0000000000000000  | 0.0000000000000000  | 26.7110004425000014 |

|    |   |    |   |   |
|----|---|----|---|---|
| Cu | N | C  | O | H |
| 4  | 9 | 64 | 3 | 5 |

Selective dynamics

Direct

|                    |                    |                    |   |   |   |
|--------------------|--------------------|--------------------|---|---|---|
| 0.3883999883824316 | 0.6109899878387068 | 0.1237199976883616 | F | F | F |
| 0.4690661371543391 | 0.6299105168735926 | 0.2027984680377659 | T | T | T |
| 0.2850792884563159 | 0.5289444195369907 | 0.1959282276305792 | T | T | T |
| 0.3676158678135732 | 0.7131776915532815 | 0.1931860642568256 | T | T | T |
| 0.3273999989159151 | 0.6724299788206594 | 0.0770300030666817 | F | F | F |
| 0.3273600042078257 | 0.4895400106801233 | 0.0762199982880674 | F | F | F |
| 0.5102499723826810 | 0.6724500060481091 | 0.0761599987757577 | F | F | F |
| 0.9996700287274507 | 0.0001800000324650 | 0.0573600009216477 | F | F | F |
| 0.0003299999634265 | 0.3344300090962307 | 0.0625099986649431 | F | F | F |
| 0.9996899962509573 | 0.6666100025562471 | 0.0586999989901287 | F | F | F |
| 0.3332400024166660 | 0.0001599999854633 | 0.0586900003380535 | F | F | F |
| 0.6654199958038518 | 0.9995099902101501 | 0.0625599995251847 | F | F | F |
| 0.6666899919723832 | 0.3331600129459886 | 0.0612300001087860 | F | F | F |
| 0.3321700096157301 | 0.3312500119332853 | 0.0634699985367249 | F | F | F |
| 0.6686199903697627 | 0.6676899790852886 | 0.0635500028781806 | F | F | F |
| 0.9991999865008054 | 0.1663299948336885 | 0.0593199990547291 | F | F | F |
| 0.0001500000141448 | 0.5002700090658863 | 0.0620899982600847 | F | F | F |
| 0.9999099969734431 | 0.8333100080615523 | 0.0571499988286135 | F | F | F |
| 0.3328500091896487 | 0.1653199940614059 | 0.0589599981996258 | F | F | F |
| 0.3319799900125986 | 0.8348799943726348 | 0.0628399997826108 | F | F | F |
| 0.6658499836809995 | 0.1663399934903538 | 0.0614599995434091 | F | F | F |

|                    |                    |                    |   |   |   |
|--------------------|--------------------|--------------------|---|---|---|
| 0.6657000184196491 | 0.4994199871907909 | 0.0623999982923920 | F | F | F |
| 0.6680499911019240 | 0.8350800275685089 | 0.0631899982792987 | F | F | F |
| 0.1665399968694743 | 0.9999399781380731 | 0.0571300014870246 | F | F | F |
| 0.1647700071264779 | 0.3318099975501880 | 0.0630899965588227 | F | F | F |
| 0.1649599969669993 | 0.6678699851318157 | 0.0628300011305356 | F | F | F |
| 0.4995799959066858 | 0.9996899962566772 | 0.0621200017787373 | F | F | F |
| 0.5004400015054742 | 0.3341600000654878 | 0.0623699985549493 | F | F | F |
| 0.8335300087518434 | 0.0006599999888621 | 0.0593699999149706 | F | F | F |
| 0.8335000276869380 | 0.3339900076717370 | 0.0614399984580416 | F | F | F |
| 0.8345299959310495 | 0.6670100092759697 | 0.0590099990224289 | F | F | F |
| 0.1655199974769772 | 0.1649699956211279 | 0.0588000007106046 | F | F | F |
| 0.1689099967855014 | 0.5010300278786701 | 0.0695900022914344 | F | F | F |
| 0.1661600023717327 | 0.8336899876319350 | 0.0583200007559981 | F | F | F |
| 0.5000299811505329 | 0.1666100025210966 | 0.0600900016626156 | F | F | F |
| 0.4982599914069894 | 0.5016000270702463 | 0.0694800019188762 | F | F | F |
| 0.4988099932978187 | 0.8309299945801385 | 0.0696299970120435 | F | F | F |
| 0.8332399726153312 | 0.1666100025210966 | 0.0610099993636766 | F | F | F |
| 0.8332399726178181 | 0.4998199939886163 | 0.0600900016626156 | F | F | F |
| 0.8348900079967692 | 0.8343399763111563 | 0.0588699989124351 | F | F | F |
| 0.0547900013529556 | 0.1105799972670667 | 0.0582499988478276 | F | F | F |
| 0.0574500001527696 | 0.4450300037547379 | 0.0647099986659398 | F | F | F |
| 0.0552599988734528 | 0.7778099775364282 | 0.0577500015516321 | F | F | F |
| 0.3890799879994375 | 0.1110199987696632 | 0.0590200014557141 | F | F | F |
| 0.3847500086142546 | 0.4413599968097515 | 0.0698899999278808 | F | F | F |
| 0.3856300115637481 | 0.7774099707386029 | 0.0697999968969185 | F | F | F |
| 0.7216899990961423 | 0.1110199987696632 | 0.0616299994282770 | F | F | F |
| 0.7213600277433585 | 0.4436900019336107 | 0.0609799995887954 | F | F | F |
| 0.7239000201781849 | 0.7793800235195363 | 0.0617300011113215 | F | F | F |
| 0.0548500008969128 | 0.2779600024177142 | 0.0611100010467140 | F | F | F |
| 0.0548699982635696 | 0.6113299727824142 | 0.0609100013869721 | F | F | F |
| 0.0557399988174794 | 0.9441199898966843 | 0.0569700002542319 | F | F | F |
| 0.3894000053534441 | 0.2770200073944125 | 0.0612200014192723 | F | F | F |
| 0.3885200023536157 | 0.9449700116936768 | 0.0609200000764787 | F | F | F |
| 0.7219600081768291 | 0.2778800130081720 | 0.0612899996210956 | F | F | F |
| 0.7228400111134903 | 0.6104599833518947 | 0.0612800009690204 | F | F | F |
| 0.7218999862732431 | 0.9449999928237744 | 0.0611900016818296 | F | F | F |
| 0.2224700004002287 | 0.1112700029890163 | 0.0579399988155274 | F | F | F |
| 0.2239000052058842 | 0.4420799910817479 | 0.0698800012383671 | F | F | F |
| 0.2217099964610867 | 0.7781400084212819 | 0.0611599981631770 | F | F | F |
| 0.5554500222519394 | 0.1106600016727199 | 0.0609599985034350 | F | F | F |
| 0.5538799763018645 | 0.4459800124308089 | 0.0648500025197052 | F | F | F |
| 0.5577600002220393 | 0.7759199738370555 | 0.0699200034090950 | F | F | F |
| 0.8886299729346163 | 0.1112200022076308 | 0.0597000010326383 | F | F | F |
| 0.8891900181671417 | 0.4444000124669500 | 0.0609400011618462 | F | F | F |



|                    |                    |                    |   |   |   |
|--------------------|--------------------|--------------------|---|---|---|
| 0.8885800242332564 | 0.7773900031831715 | 0.0579899996383304 | F | F | F |
| 0.2204699963058161 | 0.2759700119173587 | 0.0616400018241308 | F | F | F |
| 0.2224200070404621 | 0.6142200231952089 | 0.0697799995553297 | F | F | F |
| 0.2220399975825629 | 0.9445899725293785 | 0.0577399991557783 | F | F | F |
| 0.5561599731237834 | 0.2784900069045193 | 0.0609700009367202 | F | F | F |
| 0.5584899783382440 | 0.6151199936777303 | 0.0699099972694697 | F | F | F |
| 0.5548200011515050 | 0.9423800111137410 | 0.0647599995261743 | F | F | F |
| 0.8888199925564066 | 0.2781499922028985 | 0.0615999996534029 | F | F | F |
| 0.8888300061197185 | 0.6107800006620749 | 0.0590399987973029 | F | F | F |
| 0.8892800212255736 | 0.9450600147559953 | 0.0582900010185554 | F | F | F |
| 0.2532988350037718 | 0.8175537677957692 | 0.2208559195622413 | T | T | T |
| 0.1609634777575922 | 0.7065496889278755 | 0.2293327163471637 | T | T | T |
| 0.2234384081951891 | 0.8670369992061974 | 0.1821905439277418 | T | T | T |
| 0.3425368321145649 | 0.8194609963966331 | 0.2066194831313250 | T | T | T |
| 0.0674141658980650 | 0.7120661150827857 | 0.2375688997681067 | T | T | T |
| 0.1558544205160948 | 0.8573727193230158 | 0.1928076280223718 | T | T | T |
| 0.1781449305148434 | 0.6711970865857748 | 0.2616318933762659 | T | T | T |
| 0.1530865520020676 | 0.6604098049912549 | 0.1952893015264216 | T | T | T |
| 0.0231457516365806 | 0.6584657310779118 | 0.2613319183032465 | T | T | T |
| 0.2665522964448495 | 0.8634623474488291 | 0.2559600973342469 | T | T | T |

Structure30

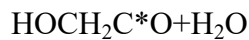

1.0000000000000000

|                     |                     |                     |
|---------------------|---------------------|---------------------|
| 14.7840003966999998 | 0.0000000000000000  | 0.0000000000000000  |
| -7.3920001983999999 | 12.8033199130999993 | 0.0000000000000000  |
| 0.0000000000000000  | 0.0000000000000000  | 26.7110004425000014 |

|    |   |    |   |   |
|----|---|----|---|---|
| Cu | N | C  | O | H |
| 4  | 9 | 64 | 3 | 5 |

Selective dynamics

Direct

|                    |                    |                    |   |   |   |
|--------------------|--------------------|--------------------|---|---|---|
| 0.3883999883824316 | 0.6109899878387068 | 0.1237199976883616 | F | F | F |
| 0.4782253680274717 | 0.6609416038733837 | 0.2010213000923506 | T | T | T |
| 0.3060409230921195 | 0.5205377202999684 | 0.1987438491332285 | T | T | T |
| 0.3326313364379811 | 0.6937594935715402 | 0.1916044712043393 | T | T | T |
| 0.3273999989159151 | 0.6724299788206594 | 0.0770300030666817 | F | F | F |
| 0.3273600042078257 | 0.4895400106801233 | 0.0762199982880674 | F | F | F |
| 0.5102499723826810 | 0.6724500060481091 | 0.0761599987757577 | F | F | F |
| 0.9996700287274507 | 0.0001800000324650 | 0.0573600009216477 | F | F | F |
| 0.0003299999634265 | 0.3344300090962307 | 0.0625099986649431 | F | F | F |
| 0.9996899962509573 | 0.6666100025562471 | 0.0586999989901287 | F | F | F |
| 0.3332400024166660 | 0.0001599999854633 | 0.0586900003380535 | F | F | F |
| 0.6654199958038518 | 0.9995099902101501 | 0.0625599995251847 | F | F | F |
| 0.6666899919723832 | 0.3331600129459886 | 0.0612300001087860 | F | F | F |

|                    |                    |                    |   |   |   |
|--------------------|--------------------|--------------------|---|---|---|
| 0.3321700096157301 | 0.3312500119332853 | 0.0634699985367249 | F | F | F |
| 0.6686199903697627 | 0.6676899790852886 | 0.0635500028781806 | F | F | F |
| 0.9991999865008054 | 0.1663299948336885 | 0.0593199990547291 | F | F | F |
| 0.0001500000141448 | 0.5002700090658863 | 0.0620899982600847 | F | F | F |
| 0.9999099969734431 | 0.8333100080615523 | 0.0571499988286135 | F | F | F |
| 0.3328500091896487 | 0.1653199940614059 | 0.0589599981996258 | F | F | F |
| 0.3319799900125986 | 0.8348799943726348 | 0.0628399997826108 | F | F | F |
| 0.6658499836809995 | 0.1663399934903538 | 0.0614599995434091 | F | F | F |
| 0.6657000184196491 | 0.4994199871907909 | 0.0623999982923920 | F | F | F |
| 0.6680499911019240 | 0.8350800275685089 | 0.0631899982792987 | F | F | F |
| 0.1665399968694743 | 0.9999399781380731 | 0.0571300014870246 | F | F | F |
| 0.1647700071264779 | 0.3318099975501880 | 0.0630899965588227 | F | F | F |
| 0.1649599969669993 | 0.6678699851318157 | 0.0628300011305356 | F | F | F |
| 0.4995799959066858 | 0.9996899962566772 | 0.0621200017787373 | F | F | F |
| 0.5004400015054742 | 0.3341600000654878 | 0.0623699985549493 | F | F | F |
| 0.8335300087518434 | 0.0006599999888621 | 0.0593699999149706 | F | F | F |
| 0.8335000276869380 | 0.3339900076717370 | 0.0614399984580416 | F | F | F |
| 0.8345299959310495 | 0.6670100092759697 | 0.0590099990224289 | F | F | F |
| 0.1655199974769772 | 0.1649699956211279 | 0.0588000007106046 | F | F | F |
| 0.1689099967855014 | 0.5010300278786701 | 0.0695900022914344 | F | F | F |
| 0.1661600023717327 | 0.8336899876319350 | 0.0583200007559981 | F | F | F |
| 0.5000299811505329 | 0.1666100025210966 | 0.0600900016626156 | F | F | F |
| 0.4982599914069894 | 0.5016000270702463 | 0.0694800019188762 | F | F | F |
| 0.4988099932978187 | 0.8309299945801385 | 0.0696299970120435 | F | F | F |
| 0.8332399726153312 | 0.1666100025210966 | 0.0610099993636766 | F | F | F |
| 0.8332399726178181 | 0.4998199939886163 | 0.0600900016626156 | F | F | F |
| 0.8348900079967692 | 0.8343399763111563 | 0.0588699989124351 | F | F | F |
| 0.0547900013529556 | 0.1105799972670667 | 0.0582499988478276 | F | F | F |
| 0.0574500001527696 | 0.4450300037547379 | 0.0647099986659398 | F | F | F |
| 0.0552599988734528 | 0.7778099775364282 | 0.0577500015516321 | F | F | F |
| 0.3890799879994375 | 0.1110199987696632 | 0.0590200014557141 | F | F | F |
| 0.3847500086142546 | 0.4413599968097515 | 0.0698899999278808 | F | F | F |
| 0.3856300115637481 | 0.7774099707386029 | 0.0697999968969185 | F | F | F |
| 0.7216899990961423 | 0.1110199987696632 | 0.0616299994282770 | F | F | F |
| 0.7213600277433585 | 0.4436900019336107 | 0.0609799995887954 | F | F | F |
| 0.7239000201781849 | 0.7793800235195363 | 0.0617300011113215 | F | F | F |
| 0.0548500008969128 | 0.2779600024177142 | 0.0611100010467140 | F | F | F |
| 0.0548699982635696 | 0.6113299727824142 | 0.0609100013869721 | F | F | F |
| 0.0557399988174794 | 0.9441199898966843 | 0.0569700002542319 | F | F | F |
| 0.3894000053534441 | 0.2770200073944125 | 0.0612200014192723 | F | F | F |
| 0.3885200023536157 | 0.9449700116936768 | 0.0609200000764787 | F | F | F |
| 0.7219600081768291 | 0.2778800130081720 | 0.0612899996210956 | F | F | F |
| 0.7228400111134903 | 0.6104599833518947 | 0.0612800009690204 | F | F | F |
| 0.7218999862732431 | 0.9449999928237744 | 0.0611900016818296 | F | F | F |

|                    |                    |                    |   |   |   |
|--------------------|--------------------|--------------------|---|---|---|
| 0.2224700004002287 | 0.1112700029890163 | 0.0579399988155274 | F | F | F |
| 0.2239000052058842 | 0.4420799910817479 | 0.0698800012383671 | F | F | F |
| 0.2217099964610867 | 0.7781400084212819 | 0.0611599981631770 | F | F | F |
| 0.5554500222519394 | 0.1106600016727199 | 0.0609599985034350 | F | F | F |
| 0.5538799763018645 | 0.4459800124308089 | 0.0648500025197052 | F | F | F |
| 0.5577600002220393 | 0.7759199738370555 | 0.0699200034090950 | F | F | F |
| 0.8886299729346163 | 0.1112200022076308 | 0.0597000010326383 | F | F | F |
| 0.8891900181671417 | 0.4444000124669500 | 0.0609400011618462 | F | F | F |
| 0.8885800242332564 | 0.7773900031831715 | 0.0579899996383304 | F | F | F |
| 0.2204699963058161 | 0.2759700119173587 | 0.0616400018241308 | F | F | F |
| 0.2224200070404621 | 0.6142200231952089 | 0.0697799995553297 | F | F | F |
| 0.2220399975825629 | 0.9445899725293785 | 0.0577399991557783 | F | F | F |
| 0.5561599731237834 | 0.2784900069045193 | 0.0609700009367202 | F | F | F |
| 0.5584899783382440 | 0.6151199936777303 | 0.0699099972694697 | F | F | F |
| 0.5548200011515050 | 0.9423800111137410 | 0.0647599995261743 | F | F | F |
| 0.8888199925564066 | 0.2781499922028985 | 0.0615999996534029 | F | F | F |
| 0.8888300061197185 | 0.6107800006620749 | 0.0590399987973029 | F | F | F |
| 0.8892800212255736 | 0.9450600147559953 | 0.0582900010185554 | F | F | F |
| 0.2613393745943962 | 0.7702646359552237 | 0.2046530675911113 | T | T | T |
| 0.1555607829129260 | 0.7091781298781106 | 0.2304891595738969 | T | T | T |
| 0.1849283546359360 | 0.9703552441098989 | 0.1799946414414887 | T | T | T |
| 0.2963972845836955 | 0.8622629013414232 | 0.1919890134843712 | T | T | T |
| 0.1039707098110404 | 0.7677528475495266 | 0.2394210497583136 | T | T | T |
| 0.1229176727906637 | 0.9232046040476495 | 0.1990316243459028 | T | T | T |
| 0.1700473248003182 | 0.6788701504193227 | 0.2656932025098054 | T | T | T |
| 0.1083681692346188 | 0.6402028235240693 | 0.2063131756442660 | T | T | T |
| 0.0439929180739392 | 0.7260721994749995 | 0.2607872881361403 | T | T | T |
| 0.2295166450827061 | 0.9393095311147064 | 0.1862469373301348 | T | T | T |

### Structure31

#### CH<sub>3</sub>COO\*

1.0000000000000000

|                     |                     |                     |
|---------------------|---------------------|---------------------|
| 14.7840003966999998 | 0.0000000000000000  | 0.0000000000000000  |
| -7.3920001983999999 | 12.8033199130999993 | 0.0000000000000000  |
| 0.0000000000000000  | 0.0000000000000000  | 26.7110004425000014 |

| Cu | N | C  | O | H |
|----|---|----|---|---|
| 4  | 9 | 64 | 2 | 3 |

Selective dynamics

Direct

|                    |                    |                    |   |   |   |
|--------------------|--------------------|--------------------|---|---|---|
| 0.3883999883824316 | 0.6109899878387068 | 0.1237199976883616 | F | F | F |
| 0.4763614185375661 | 0.6454855535850536 | 0.2017677434202137 | T | T | T |
| 0.2934678813593881 | 0.5305946533110054 | 0.1983064149499415 | T | T | T |
| 0.3619332547310436 | 0.7133143614120774 | 0.1901759425136809 | T | T | T |
| 0.3273999989159151 | 0.6724299788206594 | 0.0770300030666817 | F | F | F |

|                    |                    |                    |   |   |   |
|--------------------|--------------------|--------------------|---|---|---|
| 0.3273600042078257 | 0.4895400106801233 | 0.0762199982880674 | F | F | F |
| 0.5102499723826810 | 0.6724500060481091 | 0.0761599987757577 | F | F | F |
| 0.9996700287274507 | 0.0001800000324650 | 0.0573600009216477 | F | F | F |
| 0.0003299999634265 | 0.3344300090962307 | 0.0625099986649431 | F | F | F |
| 0.9996899962509573 | 0.6666100025562471 | 0.0586999989901287 | F | F | F |
| 0.3332400024166660 | 0.0001599999854633 | 0.0586900003380535 | F | F | F |
| 0.6654199958038518 | 0.9995099902101501 | 0.0625599995251847 | F | F | F |
| 0.6666899919723832 | 0.3331600129459886 | 0.0612300001087860 | F | F | F |
| 0.3321700096157301 | 0.3312500119332853 | 0.0634699985367249 | F | F | F |
| 0.6686199903697627 | 0.6676899790852886 | 0.0635500028781806 | F | F | F |
| 0.9991999865008054 | 0.1663299948336885 | 0.0593199990547291 | F | F | F |
| 0.0001500000141448 | 0.5002700090658863 | 0.0620899982600847 | F | F | F |
| 0.9999099969734431 | 0.8333100080615523 | 0.0571499988286135 | F | F | F |
| 0.3328500091896487 | 0.1653199940614059 | 0.0589599981996258 | F | F | F |
| 0.3319799900125986 | 0.8348799943726348 | 0.0628399997826108 | F | F | F |
| 0.6658499836809995 | 0.1663399934903538 | 0.0614599995434091 | F | F | F |
| 0.6657000184196491 | 0.4994199871907909 | 0.0623999982923920 | F | F | F |
| 0.6680499911019240 | 0.8350800275685089 | 0.0631899982792987 | F | F | F |
| 0.1665399968694743 | 0.9999399781380731 | 0.0571300014870246 | F | F | F |
| 0.1647700071264779 | 0.3318099975501880 | 0.0630899965588227 | F | F | F |
| 0.1649599969669993 | 0.6678699851318157 | 0.0628300011305356 | F | F | F |
| 0.4995799959066858 | 0.9996899962566772 | 0.0621200017787373 | F | F | F |
| 0.5004400015054742 | 0.3341600000654878 | 0.0623699985549493 | F | F | F |
| 0.8335300087518434 | 0.0006599999888621 | 0.0593699999149706 | F | F | F |
| 0.8335000276869380 | 0.3339900076717370 | 0.0614399984580416 | F | F | F |
| 0.8345299959310495 | 0.6670100092759697 | 0.0590099990224289 | F | F | F |
| 0.1655199974769772 | 0.1649699956211279 | 0.0588000007106046 | F | F | F |
| 0.1689099967855014 | 0.5010300278786701 | 0.0695900022914344 | F | F | F |
| 0.1661600023717327 | 0.8336899876319350 | 0.0583200007559981 | F | F | F |
| 0.5000299811505329 | 0.1666100025210966 | 0.0600900016626156 | F | F | F |
| 0.4982599914069894 | 0.5016000270702463 | 0.0694800019188762 | F | F | F |
| 0.4988099932978187 | 0.8309299945801385 | 0.0696299970120435 | F | F | F |
| 0.8332399726153312 | 0.1666100025210966 | 0.0610099993636766 | F | F | F |
| 0.8332399726178181 | 0.4998199939886163 | 0.0600900016626156 | F | F | F |
| 0.8348900079967692 | 0.8343399763111563 | 0.0588699989124351 | F | F | F |
| 0.0547900013529556 | 0.1105799972670667 | 0.0582499988478276 | F | F | F |
| 0.0574500001527696 | 0.4450300037547379 | 0.0647099986659398 | F | F | F |
| 0.0552599988734528 | 0.7778099775364282 | 0.0577500015516321 | F | F | F |
| 0.3890799879994375 | 0.1110199987696632 | 0.0590200014557141 | F | F | F |
| 0.3847500086142546 | 0.4413599968097515 | 0.0698899999278808 | F | F | F |
| 0.3856300115637481 | 0.7774099707386029 | 0.0697999968969185 | F | F | F |
| 0.7216899990961423 | 0.1110199987696632 | 0.0616299994282770 | F | F | F |
| 0.7213600277433585 | 0.4436900019336107 | 0.0609799995887954 | F | F | F |
| 0.7239000201781849 | 0.7793800235195363 | 0.0617300011113215 | F | F | F |

|                    |                    |                    |   |   |   |
|--------------------|--------------------|--------------------|---|---|---|
| 0.0548500008969128 | 0.2779600024177142 | 0.0611100010467140 | F | F | F |
| 0.0548699982635696 | 0.6113299727824142 | 0.0609100013869721 | F | F | F |
| 0.0557399988174794 | 0.9441199898966843 | 0.0569700002542319 | F | F | F |
| 0.3894000053534441 | 0.2770200073944125 | 0.0612200014192723 | F | F | F |
| 0.3885200023536157 | 0.9449700116936768 | 0.0609200000764787 | F | F | F |
| 0.7219600081768291 | 0.2778800130081720 | 0.0612899996210956 | F | F | F |
| 0.7228400111134903 | 0.6104599833518947 | 0.0612800009690204 | F | F | F |
| 0.7218999862732431 | 0.9449999928237744 | 0.0611900016818296 | F | F | F |
| 0.2224700004002287 | 0.1112700029890163 | 0.0579399988155274 | F | F | F |
| 0.2239000052058842 | 0.4420799910817479 | 0.0698800012383671 | F | F | F |
| 0.2217099964610867 | 0.7781400084212819 | 0.0611599981631770 | F | F | F |
| 0.5554500222519394 | 0.1106600016727199 | 0.0609599985034350 | F | F | F |
| 0.5538799763018645 | 0.4459800124308089 | 0.0648500025197052 | F | F | F |
| 0.5577600002220393 | 0.7759199738370555 | 0.0699200034090950 | F | F | F |
| 0.8886299729346163 | 0.1112200022076308 | 0.0597000010326383 | F | F | F |
| 0.8891900181671417 | 0.4444000124669500 | 0.0609400011618462 | F | F | F |
| 0.8885800242332564 | 0.7773900031831715 | 0.0579899996383304 | F | F | F |
| 0.2204699963058161 | 0.2759700119173587 | 0.0616400018241308 | F | F | F |
| 0.2224200070404621 | 0.6142200231952089 | 0.0697799995553297 | F | F | F |
| 0.2220399975825629 | 0.9445899725293785 | 0.0577399991557783 | F | F | F |
| 0.5561599731237834 | 0.2784900069045193 | 0.0609700009367202 | F | F | F |
| 0.5584899783382440 | 0.6151199936777303 | 0.0699099972694697 | F | F | F |
| 0.5548200011515050 | 0.9423800111137410 | 0.0647599995261743 | F | F | F |
| 0.8888199925564066 | 0.2781499922028985 | 0.0615999996534029 | F | F | F |
| 0.8888300061197185 | 0.6107800006620749 | 0.0590399987973029 | F | F | F |
| 0.8892800212255736 | 0.9450600147559953 | 0.0582900010185554 | F | F | F |
| 0.2370529598450425 | 0.8112268859927030 | 0.2056220681471617 | T | T | T |
| 0.1813555867842432 | 0.7370550595821098 | 0.2491886858372931 | T | T | T |
| 0.2041750748608059 | 0.8667966450727175 | 0.1880548935872817 | T | T | T |
| 0.3215303788335679 | 0.8129978291535208 | 0.1882122831221635 | T | T | T |
| 0.2367064651661980 | 0.7506721369282672 | 0.2796379793382353 | T | T | T |
| 0.1499671185452704 | 0.6557714312993823 | 0.2368031607842542 | T | T | T |
| 0.1173892524383771 | 0.7473215992506060 | 0.2631893795131346 | T | T | T |

### Structure32

#### CH<sub>3</sub>COHO\*

1.0000000000000000

|                     |                     |                     |
|---------------------|---------------------|---------------------|
| 14.7840003966999998 | 0.0000000000000000  | 0.0000000000000000  |
| -7.3920001983999999 | 12.8033199130999993 | 0.0000000000000000  |
| 0.0000000000000000  | 0.0000000000000000  | 26.7110004425000014 |

| Cu | N | C  | O | H |
|----|---|----|---|---|
| 4  | 9 | 64 | 2 | 4 |

Selective dynamics

Direct

|                    |                    |                    |   |   |   |
|--------------------|--------------------|--------------------|---|---|---|
| 0.3883999883824316 | 0.6109899878387068 | 0.1237199976883616 | F | F | F |
| 0.4677066243814490 | 0.6305110768187754 | 0.2034736155767387 | T | T | T |
| 0.2751451163440408 | 0.5305390290429318 | 0.1947462526836431 | T | T | T |
| 0.3719877250748259 | 0.7158025906612733 | 0.1899224042481085 | T | T | T |
| 0.3273999989159151 | 0.6724299788206594 | 0.0770300030666817 | F | F | F |
| 0.3273600042078257 | 0.4895400106801233 | 0.0762199982880674 | F | F | F |
| 0.5102499723826810 | 0.6724500060481091 | 0.0761599987757577 | F | F | F |
| 0.9996700287274507 | 0.0001800000324650 | 0.0573600009216477 | F | F | F |
| 0.0003299999634265 | 0.3344300090962307 | 0.0625099986649431 | F | F | F |
| 0.9996899962509573 | 0.6666100025562471 | 0.0586999989901287 | F | F | F |
| 0.3332400024166660 | 0.0001599999854633 | 0.0586900003380535 | F | F | F |
| 0.6654199958038518 | 0.9995099902101501 | 0.0625599995251847 | F | F | F |
| 0.6666899919723832 | 0.3331600129459886 | 0.0612300001087860 | F | F | F |
| 0.3321700096157301 | 0.3312500119332853 | 0.0634699985367249 | F | F | F |
| 0.6686199903697627 | 0.6676899790852886 | 0.0635500028781806 | F | F | F |
| 0.9991999865008054 | 0.1663299948336885 | 0.0593199990547291 | F | F | F |
| 0.0001500000141448 | 0.5002700090658863 | 0.0620899982600847 | F | F | F |
| 0.9999099969734431 | 0.8333100080615523 | 0.0571499988286135 | F | F | F |
| 0.3328500091896487 | 0.1653199940614059 | 0.0589599981996258 | F | F | F |
| 0.3319799900125986 | 0.8348799943726348 | 0.0628399997826108 | F | F | F |
| 0.6658499836809995 | 0.1663399934903538 | 0.0614599995434091 | F | F | F |
| 0.6657000184196491 | 0.4994199871907909 | 0.0623999982923920 | F | F | F |
| 0.6680499911019240 | 0.8350800275685089 | 0.0631899982792987 | F | F | F |
| 0.1665399968694743 | 0.9999399781380731 | 0.0571300014870246 | F | F | F |
| 0.1647700071264779 | 0.3318099975501880 | 0.0630899965588227 | F | F | F |
| 0.1649599969669993 | 0.6678699851318157 | 0.0628300011305356 | F | F | F |
| 0.4995799959066858 | 0.9996899962566772 | 0.0621200017787373 | F | F | F |
| 0.5004400015054742 | 0.3341600000654878 | 0.0623699985549493 | F | F | F |
| 0.8335300087518434 | 0.0006599999888621 | 0.0593699999149706 | F | F | F |
| 0.8335000276869380 | 0.3339900076717370 | 0.0614399984580416 | F | F | F |
| 0.8345299959310495 | 0.6670100092759697 | 0.0590099990224289 | F | F | F |
| 0.1655199974769772 | 0.1649699956211279 | 0.0588000007106046 | F | F | F |
| 0.1689099967855014 | 0.5010300278786701 | 0.0695900022914344 | F | F | F |
| 0.1661600023717327 | 0.8336899876319350 | 0.0583200007559981 | F | F | F |
| 0.5000299811505329 | 0.1666100025210966 | 0.0600900016626156 | F | F | F |
| 0.4982599914069894 | 0.5016000270702463 | 0.0694800019188762 | F | F | F |
| 0.4988099932978187 | 0.8309299945801385 | 0.0696299970120435 | F | F | F |
| 0.8332399726153312 | 0.1666100025210966 | 0.0610099993636766 | F | F | F |
| 0.8332399726178181 | 0.4998199939886163 | 0.0600900016626156 | F | F | F |
| 0.8348900079967692 | 0.8343399763111563 | 0.0588699989124351 | F | F | F |
| 0.0547900013529556 | 0.1105799972670667 | 0.0582499988478276 | F | F | F |
| 0.0574500001527696 | 0.4450300037547379 | 0.0647099986659398 | F | F | F |
| 0.0552599988734528 | 0.7778099775364282 | 0.0577500015516321 | F | F | F |
| 0.3890799879994375 | 0.1110199987696632 | 0.0590200014557141 | F | F | F |

|                    |                    |                    |   |   |   |
|--------------------|--------------------|--------------------|---|---|---|
| 0.3847500086142546 | 0.4413599968097515 | 0.0698899999278808 | F | F | F |
| 0.3856300115637481 | 0.7774099707386029 | 0.0697999968969185 | F | F | F |
| 0.7216899990961423 | 0.1110199987696632 | 0.0616299994282770 | F | F | F |
| 0.7213600277433585 | 0.4436900019336107 | 0.0609799995887954 | F | F | F |
| 0.7239000201781849 | 0.7793800235195363 | 0.0617300011113215 | F | F | F |
| 0.0548500008969128 | 0.2779600024177142 | 0.0611100010467140 | F | F | F |
| 0.0548699982635696 | 0.6113299727824142 | 0.0609100013869721 | F | F | F |
| 0.0557399988174794 | 0.9441199898966843 | 0.0569700002542319 | F | F | F |
| 0.3894000053534441 | 0.2770200073944125 | 0.0612200014192723 | F | F | F |
| 0.3885200023536157 | 0.9449700116936768 | 0.0609200000764787 | F | F | F |
| 0.7219600081768291 | 0.2778800130081720 | 0.0612899996210956 | F | F | F |
| 0.7228400111134903 | 0.6104599833518947 | 0.0612800009690204 | F | F | F |
| 0.7218999862732431 | 0.9449999928237744 | 0.0611900016818296 | F | F | F |
| 0.2224700004002287 | 0.1112700029890163 | 0.0579399988155274 | F | F | F |
| 0.2239000052058842 | 0.4420799910817479 | 0.0698800012383671 | F | F | F |
| 0.2217099964610867 | 0.7781400084212819 | 0.0611599981631770 | F | F | F |
| 0.5554500222519394 | 0.1106600016727199 | 0.0609599985034350 | F | F | F |
| 0.5538799763018645 | 0.4459800124308089 | 0.0648500025197052 | F | F | F |
| 0.5577600002220393 | 0.7759199738370555 | 0.0699200034090950 | F | F | F |
| 0.8886299729346163 | 0.1112200022076308 | 0.0597000010326383 | F | F | F |
| 0.8891900181671417 | 0.4444000124669500 | 0.0609400011618462 | F | F | F |
| 0.8885800242332564 | 0.7773900031831715 | 0.0579899996383304 | F | F | F |
| 0.2204699963058161 | 0.2759700119173587 | 0.0616400018241308 | F | F | F |
| 0.2224200070404621 | 0.6142200231952089 | 0.0697799995553297 | F | F | F |
| 0.2220399975825629 | 0.9445899725293785 | 0.0577399991557783 | F | F | F |
| 0.5561599731237834 | 0.2784900069045193 | 0.0609700009367202 | F | F | F |
| 0.5584899783382440 | 0.6151199936777303 | 0.0699099972694697 | F | F | F |
| 0.5548200011515050 | 0.9423800111137410 | 0.0647599995261743 | F | F | F |
| 0.8888199925564066 | 0.2781499922028985 | 0.0615999996534029 | F | F | F |
| 0.8888300061197185 | 0.6107800006620749 | 0.0590399987973029 | F | F | F |
| 0.8892800212255736 | 0.9450600147559953 | 0.0582900010185554 | F | F | F |
| 0.2500258019276656 | 0.8106391287189022 | 0.2185583302655617 | T | T | T |
| 0.1810529008490704 | 0.7232728129026640 | 0.2529535256694494 | T | T | T |
| 0.2263103490215417 | 0.8856562633811057 | 0.2078228832430179 | T | T | T |
| 0.3293070428229826 | 0.8187779834933511 | 0.1983121119712365 | T | T | T |
| 0.2218149658144918 | 0.7335231948927784 | 0.2887949114815606 | T | T | T |
| 0.1694731598100850 | 0.6493992758216084 | 0.2366233954364084 | T | T | T |
| 0.1054489920161334 | 0.7180550068493925 | 0.2601295420630861 | T | T | T |
| 0.1625363882198224 | 0.8717611540234418 | 0.2251958273207881 | T | T | T |

Structure33

CH<sub>3</sub>COO\*H

1.0000000000000000

14.7840003966999998      0.0000000000000000      0.0000000000000000

|                     |                     |                     |   |   |
|---------------------|---------------------|---------------------|---|---|
| -7.3920001983999999 | 12.8033199130999993 | 0.0000000000000000  |   |   |
| 0.0000000000000000  | 0.0000000000000000  | 26.7110004425000014 |   |   |
| Cu                  | N                   | C                   | O | H |
| 4                   | 9                   | 64                  | 2 | 4 |

Selective dynamics

Direct

|                    |                    |                    |   |   |   |
|--------------------|--------------------|--------------------|---|---|---|
| 0.3883999883824316 | 0.6109899878387068 | 0.1237199976883616 | F | F | F |
| 0.4749039612393310 | 0.6289392249394167 | 0.2015534089338769 | T | T | T |
| 0.2813610511480797 | 0.5256406801472054 | 0.1957445958469515 | T | T | T |
| 0.3754012709996615 | 0.7107705975956521 | 0.1920042462079355 | T | T | T |
| 0.3273999989159151 | 0.6724299788206594 | 0.0770300030666817 | F | F | F |
| 0.3273600042078257 | 0.4895400106801233 | 0.0762199982880674 | F | F | F |
| 0.5102499723826810 | 0.6724500060481091 | 0.0761599987757577 | F | F | F |
| 0.9996700287274507 | 0.0001800000324650 | 0.0573600009216477 | F | F | F |
| 0.0003299999634265 | 0.3344300090962307 | 0.0625099986649431 | F | F | F |
| 0.9996899962509573 | 0.6666100025562471 | 0.0586999989901287 | F | F | F |
| 0.3332400024166660 | 0.0001599999854633 | 0.0586900003380535 | F | F | F |
| 0.6654199958038518 | 0.9995099902101501 | 0.0625599995251847 | F | F | F |
| 0.6666899919723832 | 0.3331600129459886 | 0.0612300001087860 | F | F | F |
| 0.3321700096157301 | 0.3312500119332853 | 0.0634699985367249 | F | F | F |
| 0.6686199903697627 | 0.6676899790852886 | 0.0635500028781806 | F | F | F |
| 0.9991999865008054 | 0.1663299948336885 | 0.0593199990547291 | F | F | F |
| 0.0001500000141448 | 0.5002700090658863 | 0.0620899982600847 | F | F | F |
| 0.9999099969734431 | 0.8333100080615523 | 0.0571499988286135 | F | F | F |
| 0.3328500091896487 | 0.1653199940614059 | 0.0589599981996258 | F | F | F |
| 0.3319799900125986 | 0.8348799943726348 | 0.0628399997826108 | F | F | F |
| 0.6658499836809995 | 0.1663399934903538 | 0.0614599995434091 | F | F | F |
| 0.6657000184196491 | 0.4994199871907909 | 0.0623999982923920 | F | F | F |
| 0.6680499911019240 | 0.8350800275685089 | 0.0631899982792987 | F | F | F |
| 0.1665399968694743 | 0.9999399781380731 | 0.0571300014870246 | F | F | F |
| 0.1647700071264779 | 0.3318099975501880 | 0.0630899965588227 | F | F | F |
| 0.1649599969669993 | 0.6678699851318157 | 0.0628300011305356 | F | F | F |
| 0.4995799959066858 | 0.9996899962566772 | 0.0621200017787373 | F | F | F |
| 0.5004400015054742 | 0.3341600000654878 | 0.0623699985549493 | F | F | F |
| 0.8335300087518434 | 0.0006599999888621 | 0.0593699999149706 | F | F | F |
| 0.8335000276869380 | 0.3339900076717370 | 0.0614399984580416 | F | F | F |
| 0.8345299959310495 | 0.6670100092759697 | 0.0590099990224289 | F | F | F |
| 0.1655199974769772 | 0.1649699956211279 | 0.0588000007106046 | F | F | F |
| 0.1689099967855014 | 0.5010300278786701 | 0.0695900022914344 | F | F | F |
| 0.1661600023717327 | 0.8336899876319350 | 0.0583200007559981 | F | F | F |
| 0.5000299811505329 | 0.1666100025210966 | 0.0600900016626156 | F | F | F |
| 0.4982599914069894 | 0.5016000270702463 | 0.0694800019188762 | F | F | F |
| 0.4988099932978187 | 0.8309299945801385 | 0.0696299970120435 | F | F | F |
| 0.8332399726153312 | 0.1666100025210966 | 0.0610099993636766 | F | F | F |



|                    |                    |                    |   |   |   |
|--------------------|--------------------|--------------------|---|---|---|
| 0.8332399726178181 | 0.4998199939886163 | 0.0600900016626156 | F | F | F |
| 0.8348900079967692 | 0.8343399763111563 | 0.0588699989124351 | F | F | F |
| 0.0547900013529556 | 0.1105799972670667 | 0.0582499988478276 | F | F | F |
| 0.0574500001527696 | 0.4450300037547379 | 0.0647099986659398 | F | F | F |
| 0.0552599988734528 | 0.7778099775364282 | 0.0577500015516321 | F | F | F |
| 0.3890799879994375 | 0.1110199987696632 | 0.0590200014557141 | F | F | F |
| 0.3847500086142546 | 0.4413599968097515 | 0.0698899999278808 | F | F | F |
| 0.3856300115637481 | 0.7774099707386029 | 0.0697999968969185 | F | F | F |
| 0.7216899990961423 | 0.1110199987696632 | 0.0616299994282770 | F | F | F |
| 0.7213600277433585 | 0.4436900019336107 | 0.0609799995887954 | F | F | F |
| 0.7239000201781849 | 0.7793800235195363 | 0.0617300011113215 | F | F | F |
| 0.0548500008969128 | 0.2779600024177142 | 0.0611100010467140 | F | F | F |
| 0.0548699982635696 | 0.6113299727824142 | 0.0609100013869721 | F | F | F |
| 0.0557399988174794 | 0.9441199898966843 | 0.0569700002542319 | F | F | F |
| 0.3894000053534441 | 0.2770200073944125 | 0.0612200014192723 | F | F | F |
| 0.3885200023536157 | 0.9449700116936768 | 0.0609200000764787 | F | F | F |
| 0.7219600081768291 | 0.2778800130081720 | 0.0612899996210956 | F | F | F |
| 0.7228400111134903 | 0.6104599833518947 | 0.0612800009690204 | F | F | F |
| 0.7218999862732431 | 0.9449999928237744 | 0.0611900016818296 | F | F | F |
| 0.2224700004002287 | 0.1112700029890163 | 0.0579399988155274 | F | F | F |
| 0.2239000052058842 | 0.4420799910817479 | 0.0698800012383671 | F | F | F |
| 0.2217099964610867 | 0.7781400084212819 | 0.0611599981631770 | F | F | F |
| 0.5554500222519394 | 0.1106600016727199 | 0.0609599985034350 | F | F | F |
| 0.5538799763018645 | 0.4459800124308089 | 0.0648500025197052 | F | F | F |
| 0.5577600002220393 | 0.7759199738370555 | 0.0699200034090950 | F | F | F |
| 0.8886299729346163 | 0.1112200022076308 | 0.0597000010326383 | F | F | F |
| 0.8891900181671417 | 0.4444000124669500 | 0.0609400011618462 | F | F | F |
| 0.8885800242332564 | 0.7773900031831715 | 0.0579899996383304 | F | F | F |
| 0.2204699963058161 | 0.2759700119173587 | 0.0616400018241308 | F | F | F |
| 0.2224200070404621 | 0.6142200231952089 | 0.0697799995553297 | F | F | F |
| 0.2220399975825629 | 0.9445899725293785 | 0.0577399991557783 | F | F | F |
| 0.5561599731237834 | 0.2784900069045193 | 0.0609700009367202 | F | F | F |
| 0.5584899783382440 | 0.6151199936777303 | 0.0699099972694697 | F | F | F |
| 0.5548200011515050 | 0.9423800111137410 | 0.0647599995261743 | F | F | F |
| 0.8888199925564066 | 0.2781499922028985 | 0.0615999996534029 | F | F | F |
| 0.8888300061197185 | 0.6107800006620749 | 0.0590399987973029 | F | F | F |
| 0.8892800212255736 | 0.9450600147559953 | 0.0582900010185554 | F | F | F |
| 0.2442137217065798 | 0.8171581412775363 | 0.2166394730448001 | T | T | T |
| 0.1869148011723605 | 0.7276360433169595 | 0.2517528627796637 | T | T | T |
| 0.2210959431644694 | 0.8806647704437957 | 0.2024664595152149 | T | T | T |
| 0.3373448580441887 | 0.8234876774875378 | 0.1991422122243126 | T | T | T |
| 0.2353174601562631 | 0.7381418793284531 | 0.2848848606331422 | T | T | T |
| 0.1721988498554659 | 0.6542999285706171 | 0.2337127052051023 | T | T | T |
| 0.1135727722413001 | 0.7229636373489805 | 0.2629628248452106 | T | T | T |

0.3682170133915197 0.8812148459701903 0.1749086242466414 T T T

Structure34

CH<sub>4</sub>+COO\*

1.0000000000000000

14.7840003966999998 0.0000000000000000 0.0000000000000000

-7.3920001983999999 12.8033199130999993 0.0000000000000000

0.0000000000000000 0.0000000000000000 26.7110004425000014

Cu N C O H

4 9 64 2 4

Selective dynamics

Direct

0.3883999883824316 0.6109899878387068 0.1237199976883616 F F F

0.4755845446011821 0.6131452131860792 0.1996177698310020 T T T

0.2818818106643254 0.5369972509558243 0.1968308635725388 T T T

0.3998819168986962 0.7190776927129693 0.1936957453326602 T T T

0.3273999989159151 0.6724299788206594 0.0770300030666817 F F F

0.3273600042078257 0.4895400106801233 0.0762199982880674 F F F

0.5102499723826810 0.6724500060481091 0.0761599987757577 F F F

0.9996700287274507 0.0001800000324650 0.0573600009216477 F F F

0.0003299999634265 0.3344300090962307 0.0625099986649431 F F F

0.9996899962509573 0.6666100025562471 0.0586999989901287 F F F

0.3332400024166660 0.0001599999854633 0.0586900003380535 F F F

0.6654199958038518 0.9995099902101501 0.0625599995251847 F F F

0.6666899919723832 0.3331600129459886 0.0612300001087860 F F F

0.3321700096157301 0.3312500119332853 0.0634699985367249 F F F

0.6686199903697627 0.6676899790852886 0.0635500028781806 F F F

0.9991999865008054 0.1663299948336885 0.0593199990547291 F F F

0.0001500000141448 0.5002700090658863 0.0620899982600847 F F F

0.9999099969734431 0.8333100080615523 0.0571499988286135 F F F

0.3328500091896487 0.1653199940614059 0.0589599981996258 F F F

0.3319799900125986 0.8348799943726348 0.0628399997826108 F F F

0.6658499836809995 0.1663399934903538 0.0614599995434091 F F F

0.6657000184196491 0.4994199871907909 0.0623999982923920 F F F

0.6680499911019240 0.8350800275685089 0.0631899982792987 F F F

0.1665399968694743 0.9999399781380731 0.0571300014870246 F F F

0.1647700071264779 0.3318099975501880 0.0630899965588227 F F F

0.1649599969669993 0.6678699851318157 0.0628300011305356 F F F

0.4995799959066858 0.9996899962566772 0.0621200017787373 F F F

0.5004400015054742 0.3341600000654878 0.0623699985549493 F F F

0.8335300087518434 0.0006599999888621 0.0593699999149706 F F F

0.8335000276869380 0.3339900076717370 0.0614399984580416 F F F

0.8345299959310495 0.6670100092759697 0.0590099990224289 F F F

0.1655199974769772 0.1649699956211279 0.0588000007106046 F F F

|                    |                    |                    |   |   |   |
|--------------------|--------------------|--------------------|---|---|---|
| 0.1689099967855014 | 0.5010300278786701 | 0.0695900022914344 | F | F | F |
| 0.1661600023717327 | 0.8336899876319350 | 0.0583200007559981 | F | F | F |
| 0.5000299811505329 | 0.1666100025210966 | 0.0600900016626156 | F | F | F |
| 0.4982599914069894 | 0.5016000270702463 | 0.0694800019188762 | F | F | F |
| 0.4988099932978187 | 0.8309299945801385 | 0.0696299970120435 | F | F | F |
| 0.8332399726153312 | 0.1666100025210966 | 0.0610099993636766 | F | F | F |
| 0.8332399726178181 | 0.4998199939886163 | 0.0600900016626156 | F | F | F |
| 0.8348900079967692 | 0.8343399763111563 | 0.0588699989124351 | F | F | F |
| 0.0547900013529556 | 0.1105799972670667 | 0.0582499988478276 | F | F | F |
| 0.0574500001527696 | 0.4450300037547379 | 0.0647099986659398 | F | F | F |
| 0.0552599988734528 | 0.7778099775364282 | 0.0577500015516321 | F | F | F |
| 0.3890799879994375 | 0.1110199987696632 | 0.0590200014557141 | F | F | F |
| 0.3847500086142546 | 0.4413599968097515 | 0.0698899999278808 | F | F | F |
| 0.3856300115637481 | 0.7774099707386029 | 0.0697999968969185 | F | F | F |
| 0.7216899990961423 | 0.1110199987696632 | 0.0616299994282770 | F | F | F |
| 0.7213600277433585 | 0.4436900019336107 | 0.0609799995887954 | F | F | F |
| 0.7239000201781849 | 0.7793800235195363 | 0.0617300011113215 | F | F | F |
| 0.0548500008969128 | 0.2779600024177142 | 0.0611100010467140 | F | F | F |
| 0.0548699982635696 | 0.6113299727824142 | 0.0609100013869721 | F | F | F |
| 0.0557399988174794 | 0.9441199898966843 | 0.0569700002542319 | F | F | F |
| 0.3894000053534441 | 0.2770200073944125 | 0.0612200014192723 | F | F | F |
| 0.3885200023536157 | 0.9449700116936768 | 0.0609200000764787 | F | F | F |
| 0.7219600081768291 | 0.2778800130081720 | 0.0612899996210956 | F | F | F |
| 0.7228400111134903 | 0.6104599833518947 | 0.0612800009690204 | F | F | F |
| 0.7218999862732431 | 0.9449999928237744 | 0.0611900016818296 | F | F | F |
| 0.2224700004002287 | 0.1112700029890163 | 0.0579399988155274 | F | F | F |
| 0.2239000052058842 | 0.4420799910817479 | 0.0698800012383671 | F | F | F |
| 0.2217099964610867 | 0.7781400084212819 | 0.0611599981631770 | F | F | F |
| 0.5554500222519394 | 0.1106600016727199 | 0.0609599985034350 | F | F | F |
| 0.5538799763018645 | 0.4459800124308089 | 0.0648500025197052 | F | F | F |
| 0.5577600002220393 | 0.7759199738370555 | 0.0699200034090950 | F | F | F |
| 0.8886299729346163 | 0.1112200022076308 | 0.0597000010326383 | F | F | F |
| 0.8891900181671417 | 0.4444000124669500 | 0.0609400011618462 | F | F | F |
| 0.8885800242332564 | 0.7773900031831715 | 0.0579899996383304 | F | F | F |
| 0.2204699963058161 | 0.2759700119173587 | 0.0616400018241308 | F | F | F |
| 0.2224200070404621 | 0.6142200231952089 | 0.0697799995553297 | F | F | F |
| 0.2220399975825629 | 0.9445899725293785 | 0.0577399991557783 | F | F | F |
| 0.5561599731237834 | 0.2784900069045193 | 0.0609700009367202 | F | F | F |
| 0.5584899783382440 | 0.6151199936777303 | 0.0699099972694697 | F | F | F |
| 0.5548200011515050 | 0.9423800111137410 | 0.0647599995261743 | F | F | F |
| 0.8888199925564066 | 0.2781499922028985 | 0.0615999996534029 | F | F | F |
| 0.8888300061197185 | 0.6107800006620749 | 0.0590399987973029 | F | F | F |
| 0.8892800212255736 | 0.9450600147559953 | 0.0582900010185554 | F | F | F |
| 0.3332343291090298 | 0.8839900460371114 | 0.1993952762991621 | T | T | T |

|                    |                    |                    |   |   |   |
|--------------------|--------------------|--------------------|---|---|---|
| 0.1346663236560453 | 0.6594597365955891 | 0.2810811315652428 | T | T | T |
| 0.2802308130614445 | 0.9197115751095249 | 0.1900061774491749 | T | T | T |
| 0.3872727223551249 | 0.8483712819757883 | 0.2091499456245928 | T | T | T |
| 0.1874197192417089 | 0.6942739713063292 | 0.3130485769349098 | T | T | T |
| 0.0608881929108320 | 0.5930790082003563 | 0.2939623133658509 | T | T | T |
| 0.1188194485602852 | 0.7175329665209967 | 0.2639004198748358 | T | T | T |
| 0.1705637038285290 | 0.6319342173853291 | 0.2534531301520043 | T | T | T |

Structure35

CH<sub>3</sub>CHOO\*

1.0000000000000000

|                     |                     |                     |
|---------------------|---------------------|---------------------|
| 14.7840003966999998 | 0.0000000000000000  | 0.0000000000000000  |
| -7.3920001983999999 | 12.8033199130999993 | 0.0000000000000000  |
| 0.0000000000000000  | 0.0000000000000000  | 26.7110004425000014 |

|    |   |    |   |   |
|----|---|----|---|---|
| Cu | N | C  | O | H |
| 4  | 9 | 64 | 2 | 4 |

Selective dynamics

Direct

|                    |                    |                    |   |   |   |
|--------------------|--------------------|--------------------|---|---|---|
| 0.3883999883824316 | 0.6109899878387068 | 0.1237199976883616 | F | F | F |
| 0.4657770734261124 | 0.6292376695229401 | 0.2042030487356850 | T | T | T |
| 0.2826204837703634 | 0.5497373828805636 | 0.1975190354980762 | T | T | T |
| 0.3841854768167346 | 0.7315597036592816 | 0.1896410360965249 | T | T | T |
| 0.3273999989159151 | 0.6724299788206594 | 0.0770300030666817 | F | F | F |
| 0.3273600042078257 | 0.4895400106801233 | 0.0762199982880674 | F | F | F |
| 0.5102499723826810 | 0.6724500060481091 | 0.0761599987757577 | F | F | F |
| 0.9996700287274507 | 0.0001800000324650 | 0.0573600009216477 | F | F | F |
| 0.0003299999634265 | 0.3344300090962307 | 0.0625099986649431 | F | F | F |
| 0.9996899962509573 | 0.6666100025562471 | 0.0586999989901287 | F | F | F |
| 0.3332400024166660 | 0.0001599999854633 | 0.0586900003380535 | F | F | F |
| 0.6654199958038518 | 0.9995099902101501 | 0.0625599995251847 | F | F | F |
| 0.6666899919723832 | 0.3331600129459886 | 0.0612300001087860 | F | F | F |
| 0.3321700096157301 | 0.3312500119332853 | 0.0634699985367249 | F | F | F |
| 0.6686199903697627 | 0.6676899790852886 | 0.0635500028781806 | F | F | F |
| 0.9991999865008054 | 0.1663299948336885 | 0.0593199990547291 | F | F | F |
| 0.0001500000141448 | 0.5002700090658863 | 0.0620899982600847 | F | F | F |
| 0.9999099969734431 | 0.8333100080615523 | 0.0571499988286135 | F | F | F |
| 0.3328500091896487 | 0.1653199940614059 | 0.0589599981996258 | F | F | F |
| 0.3319799900125986 | 0.8348799943726348 | 0.0628399997826108 | F | F | F |
| 0.6658499836809995 | 0.1663399934903538 | 0.0614599995434091 | F | F | F |
| 0.6657000184196491 | 0.4994199871907909 | 0.0623999982923920 | F | F | F |
| 0.6680499911019240 | 0.8350800275685089 | 0.0631899982792987 | F | F | F |
| 0.1665399968694743 | 0.9999399781380731 | 0.0571300014870246 | F | F | F |
| 0.1647700071264779 | 0.3318099975501880 | 0.0630899965588227 | F | F | F |
| 0.1649599969669993 | 0.6678699851318157 | 0.0628300011305356 | F | F | F |

|                    |                    |                    |   |   |   |
|--------------------|--------------------|--------------------|---|---|---|
| 0.4995799959066858 | 0.9996899962566772 | 0.0621200017787373 | F | F | F |
| 0.5004400015054742 | 0.3341600000654878 | 0.0623699985549493 | F | F | F |
| 0.8335300087518434 | 0.0006599999888621 | 0.0593699999149706 | F | F | F |
| 0.8335000276869380 | 0.3339900076717370 | 0.0614399984580416 | F | F | F |
| 0.8345299959310495 | 0.6670100092759697 | 0.0590099990224289 | F | F | F |
| 0.1655199974769772 | 0.1649699956211279 | 0.0588000007106046 | F | F | F |
| 0.1689099967855014 | 0.5010300278786701 | 0.0695900022914344 | F | F | F |
| 0.1661600023717327 | 0.8336899876319350 | 0.0583200007559981 | F | F | F |
| 0.5000299811505329 | 0.1666100025210966 | 0.0600900016626156 | F | F | F |
| 0.4982599914069894 | 0.5016000270702463 | 0.0694800019188762 | F | F | F |
| 0.4988099932978187 | 0.8309299945801385 | 0.0696299970120435 | F | F | F |
| 0.8332399726153312 | 0.1666100025210966 | 0.0610099993636766 | F | F | F |
| 0.8332399726178181 | 0.4998199939886163 | 0.0600900016626156 | F | F | F |
| 0.8348900079967692 | 0.8343399763111563 | 0.0588699989124351 | F | F | F |
| 0.0547900013529556 | 0.1105799972670667 | 0.0582499988478276 | F | F | F |
| 0.0574500001527696 | 0.4450300037547379 | 0.0647099986659398 | F | F | F |
| 0.0552599988734528 | 0.7778099775364282 | 0.0577500015516321 | F | F | F |
| 0.3890799879994375 | 0.1110199987696632 | 0.0590200014557141 | F | F | F |
| 0.3847500086142546 | 0.4413599968097515 | 0.0698899999278808 | F | F | F |
| 0.3856300115637481 | 0.7774099707386029 | 0.0697999968969185 | F | F | F |
| 0.7216899990961423 | 0.1110199987696632 | 0.0616299994282770 | F | F | F |
| 0.7213600277433585 | 0.4436900019336107 | 0.0609799995887954 | F | F | F |
| 0.7239000201781849 | 0.7793800235195363 | 0.0617300011113215 | F | F | F |
| 0.0548500008969128 | 0.2779600024177142 | 0.0611100010467140 | F | F | F |
| 0.0548699982635696 | 0.6113299727824142 | 0.0609100013869721 | F | F | F |
| 0.0557399988174794 | 0.9441199898966843 | 0.0569700002542319 | F | F | F |
| 0.3894000053534441 | 0.2770200073944125 | 0.0612200014192723 | F | F | F |
| 0.3885200023536157 | 0.9449700116936768 | 0.0609200000764787 | F | F | F |
| 0.7219600081768291 | 0.2778800130081720 | 0.0612899996210956 | F | F | F |
| 0.7228400111134903 | 0.6104599833518947 | 0.0612800009690204 | F | F | F |
| 0.7218999862732431 | 0.9449999928237744 | 0.0611900016818296 | F | F | F |
| 0.2224700004002287 | 0.1112700029890163 | 0.0579399988155274 | F | F | F |
| 0.2239000052058842 | 0.4420799910817479 | 0.0698800012383671 | F | F | F |
| 0.2217099964610867 | 0.7781400084212819 | 0.0611599981631770 | F | F | F |
| 0.5554500222519394 | 0.1106600016727199 | 0.0609599985034350 | F | F | F |
| 0.5538799763018645 | 0.4459800124308089 | 0.0648500025197052 | F | F | F |
| 0.5577600002220393 | 0.7759199738370555 | 0.0699200034090950 | F | F | F |
| 0.8886299729346163 | 0.1112200022076308 | 0.0597000010326383 | F | F | F |
| 0.8891900181671417 | 0.4444000124669500 | 0.0609400011618462 | F | F | F |
| 0.8885800242332564 | 0.7773900031831715 | 0.0579899996383304 | F | F | F |
| 0.2204699963058161 | 0.2759700119173587 | 0.0616400018241308 | F | F | F |
| 0.2224200070404621 | 0.6142200231952089 | 0.0697799995553297 | F | F | F |
| 0.2220399975825629 | 0.9445899725293785 | 0.0577399991557783 | F | F | F |
| 0.5561599731237834 | 0.2784900069045193 | 0.0609700009367202 | F | F | F |

|                    |                    |                    |   |   |   |
|--------------------|--------------------|--------------------|---|---|---|
| 0.5584899783382440 | 0.6151199936777303 | 0.0699099972694697 | F | F | F |
| 0.5548200011515050 | 0.9423800111137410 | 0.0647599995261743 | F | F | F |
| 0.8888199925564066 | 0.2781499922028985 | 0.0615999996534029 | F | F | F |
| 0.8888300061197185 | 0.6107800006620749 | 0.0590399987973029 | F | F | F |
| 0.8892800212255736 | 0.9450600147559953 | 0.0582900010185554 | F | F | F |
| 0.2565523662163358 | 0.8299703265137628 | 0.1969735704925791 | T | T | T |
| 0.1879573042821823 | 0.7403971154049869 | 0.2339287671390730 | T | T | T |
| 0.2066010620741253 | 0.8246864800161217 | 0.1541155996735737 | T | T | T |
| 0.3557365675533778 | 0.8361957927914712 | 0.1905392676542281 | T | T | T |
| 0.2279493328008693 | 0.7515363679834480 | 0.2700269509852779 | T | T | T |
| 0.1739061211216176 | 0.6664174152138965 | 0.2168134083194414 | T | T | T |
| 0.1125779958429031 | 0.7367054240273126 | 0.2399690261991368 | T | T | T |
| 0.2770888365448410 | 0.9048974145960597 | 0.2172255688921859 | T | T | T |

### Structure36

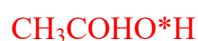

1.0000000000000000

|                     |                     |                     |
|---------------------|---------------------|---------------------|
| 14.7840003966999998 | 0.0000000000000000  | 0.0000000000000000  |
| -7.3920001983999999 | 12.8033199130999993 | 0.0000000000000000  |
| 0.0000000000000000  | 0.0000000000000000  | 26.7110004425000014 |

|    |   |    |   |   |
|----|---|----|---|---|
| Cu | N | C  | O | H |
| 4  | 9 | 64 | 2 | 5 |

Selective dynamics

Direct

|                    |                    |                    |   |   |   |
|--------------------|--------------------|--------------------|---|---|---|
| 0.3883999883824316 | 0.6109899878387068 | 0.1237199976883616 | F | F | F |
| 0.4748743839168369 | 0.6597642423759066 | 0.2016431646035037 | T | T | T |
| 0.3001769112517537 | 0.5271223287210509 | 0.1984556401943546 | T | T | T |
| 0.3374761603011390 | 0.7040001982210840 | 0.1942467581169666 | T | T | T |
| 0.3273999989159151 | 0.6724299788206594 | 0.0770300030666817 | F | F | F |
| 0.3273600042078257 | 0.4895400106801233 | 0.0762199982880674 | F | F | F |
| 0.5102499723826810 | 0.6724500060481091 | 0.0761599987757577 | F | F | F |
| 0.9996700287274507 | 0.0001800000324650 | 0.0573600009216477 | F | F | F |
| 0.0003299999634265 | 0.3344300090962307 | 0.0625099986649431 | F | F | F |
| 0.9996899962509573 | 0.6666100025562471 | 0.0586999989901287 | F | F | F |
| 0.3332400024166660 | 0.0001599999854633 | 0.0586900003380535 | F | F | F |
| 0.6654199958038518 | 0.9995099902101501 | 0.0625599995251847 | F | F | F |
| 0.6666899919723832 | 0.3331600129459886 | 0.0612300001087860 | F | F | F |
| 0.3321700096157301 | 0.3312500119332853 | 0.0634699985367249 | F | F | F |
| 0.6686199903697627 | 0.6676899790852886 | 0.0635500028781806 | F | F | F |
| 0.9991999865008054 | 0.1663299948336885 | 0.0593199990547291 | F | F | F |
| 0.0001500000141448 | 0.5002700090658863 | 0.0620899982600847 | F | F | F |
| 0.9999099969734431 | 0.8333100080615523 | 0.0571499988286135 | F | F | F |
| 0.3328500091896487 | 0.1653199940614059 | 0.0589599981996258 | F | F | F |
| 0.3319799900125986 | 0.8348799943726348 | 0.0628399997826108 | F | F | F |

|                    |                    |                    |   |   |   |
|--------------------|--------------------|--------------------|---|---|---|
| 0.6658499836809995 | 0.1663399934903538 | 0.0614599995434091 | F | F | F |
| 0.6657000184196491 | 0.4994199871907909 | 0.0623999982923920 | F | F | F |
| 0.6680499911019240 | 0.8350800275685089 | 0.0631899982792987 | F | F | F |
| 0.1665399968694743 | 0.9999399781380731 | 0.0571300014870246 | F | F | F |
| 0.1647700071264779 | 0.3318099975501880 | 0.0630899965588227 | F | F | F |
| 0.1649599969669993 | 0.6678699851318157 | 0.0628300011305356 | F | F | F |
| 0.4995799959066858 | 0.9996899962566772 | 0.0621200017787373 | F | F | F |
| 0.5004400015054742 | 0.3341600000654878 | 0.0623699985549493 | F | F | F |
| 0.8335300087518434 | 0.0006599999888621 | 0.0593699999149706 | F | F | F |
| 0.8335000276869380 | 0.3339900076717370 | 0.0614399984580416 | F | F | F |
| 0.8345299959310495 | 0.6670100092759697 | 0.0590099990224289 | F | F | F |
| 0.1655199974769772 | 0.1649699956211279 | 0.0588000007106046 | F | F | F |
| 0.1689099967855014 | 0.5010300278786701 | 0.0695900022914344 | F | F | F |
| 0.1661600023717327 | 0.8336899876319350 | 0.0583200007559981 | F | F | F |
| 0.5000299811505329 | 0.1666100025210966 | 0.0600900016626156 | F | F | F |
| 0.4982599914069894 | 0.5016000270702463 | 0.0694800019188762 | F | F | F |
| 0.4988099932978187 | 0.8309299945801385 | 0.0696299970120435 | F | F | F |
| 0.8332399726153312 | 0.1666100025210966 | 0.0610099993636766 | F | F | F |
| 0.8332399726178181 | 0.4998199939886163 | 0.0600900016626156 | F | F | F |
| 0.8348900079967692 | 0.8343399763111563 | 0.0588699989124351 | F | F | F |
| 0.0547900013529556 | 0.1105799972670667 | 0.0582499988478276 | F | F | F |
| 0.0574500001527696 | 0.4450300037547379 | 0.0647099986659398 | F | F | F |
| 0.0552599988734528 | 0.7778099775364282 | 0.0577500015516321 | F | F | F |
| 0.3890799879994375 | 0.1110199987696632 | 0.0590200014557141 | F | F | F |
| 0.3847500086142546 | 0.4413599968097515 | 0.0698899999278808 | F | F | F |
| 0.3856300115637481 | 0.7774099707386029 | 0.0697999968969185 | F | F | F |
| 0.7216899990961423 | 0.1110199987696632 | 0.0616299994282770 | F | F | F |
| 0.7213600277433585 | 0.4436900019336107 | 0.0609799995887954 | F | F | F |
| 0.7239000201781849 | 0.7793800235195363 | 0.0617300011113215 | F | F | F |
| 0.0548500008969128 | 0.2779600024177142 | 0.0611100010467140 | F | F | F |
| 0.0548699982635696 | 0.6113299727824142 | 0.0609100013869721 | F | F | F |
| 0.0557399988174794 | 0.9441199898966843 | 0.0569700002542319 | F | F | F |
| 0.3894000053534441 | 0.2770200073944125 | 0.0612200014192723 | F | F | F |
| 0.3885200023536157 | 0.9449700116936768 | 0.0609200000764787 | F | F | F |
| 0.7219600081768291 | 0.2778800130081720 | 0.0612899996210956 | F | F | F |
| 0.7228400111134903 | 0.6104599833518947 | 0.0612800009690204 | F | F | F |
| 0.7218999862732431 | 0.9449999928237744 | 0.0611900016818296 | F | F | F |
| 0.2224700004002287 | 0.1112700029890163 | 0.0579399988155274 | F | F | F |
| 0.2239000052058842 | 0.4420799910817479 | 0.0698800012383671 | F | F | F |
| 0.2217099964610867 | 0.7781400084212819 | 0.0611599981631770 | F | F | F |
| 0.5554500222519394 | 0.1106600016727199 | 0.0609599985034350 | F | F | F |
| 0.5538799763018645 | 0.4459800124308089 | 0.0648500025197052 | F | F | F |
| 0.5577600002220393 | 0.7759199738370555 | 0.0699200034090950 | F | F | F |
| 0.8886299729346163 | 0.1112200022076308 | 0.0597000010326383 | F | F | F |

|                    |                     |                    |   |   |   |
|--------------------|---------------------|--------------------|---|---|---|
| 0.8891900181671417 | 0.4444000124669500  | 0.0609400011618462 | F | F | F |
| 0.8885800242332564 | 0.7773900031831715  | 0.0579899996383304 | F | F | F |
| 0.2204699963058161 | 0.2759700119173587  | 0.0616400018241308 | F | F | F |
| 0.2224200070404621 | 0.6142200231952089  | 0.0697799995553297 | F | F | F |
| 0.2220399975825629 | 0.9445899725293785  | 0.0577399991557783 | F | F | F |
| 0.5561599731237834 | 0.2784900069045193  | 0.0609700009367202 | F | F | F |
| 0.5584899783382440 | 0.6151199936777303  | 0.0699099972694697 | F | F | F |
| 0.5548200011515050 | 0.94238001111137410 | 0.0647599995261743 | F | F | F |
| 0.8888199925564066 | 0.2781499922028985  | 0.0615999996534029 | F | F | F |
| 0.8888300061197185 | 0.6107800006620749  | 0.0590399987973029 | F | F | F |
| 0.8892800212255736 | 0.9450600147559953  | 0.0582900010185554 | F | F | F |
| 0.2835211655402245 | 0.7923849769878659  | 0.2205245435470498 | T | T | T |
| 0.1925207897872332 | 0.7365998830162817  | 0.2570482197994516 | T | T | T |
| 0.2537092110801060 | 0.8327724758575807  | 0.1794656160642959 | T | T | T |
| 0.3671780449158802 | 0.8848510841689295  | 0.2448391507664679 | T | T | T |
| 0.1664152336173921 | 0.7910891358423465  | 0.2700816878959826 | T | T | T |
| 0.2146822733774343 | 0.7073728574114123  | 0.2900440907413296 | T | T | T |
| 0.1266215616344708 | 0.6696514622767752  | 0.2386232122705924 | T | T | T |
| 0.2354783507730484 | 0.8833009393495075  | 0.1933312687911859 | T | T | T |
| 0.3831859882596407 | 0.8625659117245666  | 0.2763031938889041 | T | T | T |

### Structure37

CH<sub>3</sub>CHOHO\*

1.0000000000000000

|                     |                     |                     |
|---------------------|---------------------|---------------------|
| 14.7840003966999998 | 0.0000000000000000  | 0.0000000000000000  |
| -7.3920001983999999 | 12.8033199130999993 | 0.0000000000000000  |
| 0.0000000000000000  | 0.0000000000000000  | 26.7110004425000014 |

| Cu | N | C  | O | H |
|----|---|----|---|---|
| 4  | 9 | 64 | 2 | 5 |

### Selective dynamics

Direct

|                    |                    |                    |   |   |   |
|--------------------|--------------------|--------------------|---|---|---|
| 0.3883999883824316 | 0.6109899878387068 | 0.1237199976883616 | F | F | F |
| 0.4663149183782191 | 0.6268292640410343 | 0.2031002750488433 | T | T | T |
| 0.2823076165771550 | 0.5316445750754593 | 0.1952464712415719 | T | T | T |
| 0.3710257807130588 | 0.7162186416058270 | 0.1926989958574349 | T | T | T |
| 0.327399989159151  | 0.6724299788206594 | 0.0770300030666817 | F | F | F |
| 0.3273600042078257 | 0.4895400106801233 | 0.0762199982880674 | F | F | F |
| 0.5102499723826810 | 0.6724500060481091 | 0.0761599987757577 | F | F | F |
| 0.9996700287274507 | 0.0001800000324650 | 0.0573600009216477 | F | F | F |
| 0.0003299999634265 | 0.3344300090962307 | 0.0625099986649431 | F | F | F |
| 0.9996899962509573 | 0.6666100025562471 | 0.0586999989901287 | F | F | F |
| 0.3332400024166660 | 0.0001599999854633 | 0.0586900003380535 | F | F | F |
| 0.6654199958038518 | 0.9995099902101501 | 0.0625599995251847 | F | F | F |
| 0.6666899919723832 | 0.3331600129459886 | 0.0612300001087860 | F | F | F |



|                    |                    |                    |   |   |   |
|--------------------|--------------------|--------------------|---|---|---|
| 0.3321700096157301 | 0.3312500119332853 | 0.0634699985367249 | F | F | F |
| 0.6686199903697627 | 0.6676899790852886 | 0.0635500028781806 | F | F | F |
| 0.9991999865008054 | 0.1663299948336885 | 0.0593199990547291 | F | F | F |
| 0.0001500000141448 | 0.5002700090658863 | 0.0620899982600847 | F | F | F |
| 0.9999099969734431 | 0.8333100080615523 | 0.0571499988286135 | F | F | F |
| 0.3328500091896487 | 0.1653199940614059 | 0.0589599981996258 | F | F | F |
| 0.3319799900125986 | 0.8348799943726348 | 0.0628399997826108 | F | F | F |
| 0.6658499836809995 | 0.1663399934903538 | 0.0614599995434091 | F | F | F |
| 0.6657000184196491 | 0.4994199871907909 | 0.0623999982923920 | F | F | F |
| 0.6680499911019240 | 0.8350800275685089 | 0.0631899982792987 | F | F | F |
| 0.1665399968694743 | 0.9999399781380731 | 0.0571300014870246 | F | F | F |
| 0.1647700071264779 | 0.3318099975501880 | 0.0630899965588227 | F | F | F |
| 0.1649599969669993 | 0.6678699851318157 | 0.0628300011305356 | F | F | F |
| 0.4995799959066858 | 0.9996899962566772 | 0.0621200017787373 | F | F | F |
| 0.5004400015054742 | 0.3341600000654878 | 0.0623699985549493 | F | F | F |
| 0.8335300087518434 | 0.0006599999888621 | 0.0593699999149706 | F | F | F |
| 0.8335000276869380 | 0.3339900076717370 | 0.0614399984580416 | F | F | F |
| 0.8345299959310495 | 0.6670100092759697 | 0.0590099990224289 | F | F | F |
| 0.1655199974769772 | 0.1649699956211279 | 0.0588000007106046 | F | F | F |
| 0.1689099967855014 | 0.5010300278786701 | 0.0695900022914344 | F | F | F |
| 0.1661600023717327 | 0.8336899876319350 | 0.0583200007559981 | F | F | F |
| 0.5000299811505329 | 0.1666100025210966 | 0.0600900016626156 | F | F | F |
| 0.4982599914069894 | 0.5016000270702463 | 0.0694800019188762 | F | F | F |
| 0.4988099932978187 | 0.8309299945801385 | 0.0696299970120435 | F | F | F |
| 0.8332399726153312 | 0.1666100025210966 | 0.0610099993636766 | F | F | F |
| 0.8332399726178181 | 0.4998199939886163 | 0.0600900016626156 | F | F | F |
| 0.8348900079967692 | 0.8343399763111563 | 0.0588699989124351 | F | F | F |
| 0.0547900013529556 | 0.1105799972670667 | 0.0582499988478276 | F | F | F |
| 0.0574500001527696 | 0.4450300037547379 | 0.0647099986659398 | F | F | F |
| 0.0552599988734528 | 0.7778099775364282 | 0.0577500015516321 | F | F | F |
| 0.3890799879994375 | 0.1110199987696632 | 0.0590200014557141 | F | F | F |
| 0.3847500086142546 | 0.4413599968097515 | 0.0698899999278808 | F | F | F |
| 0.3856300115637481 | 0.7774099707386029 | 0.0697999968969185 | F | F | F |
| 0.7216899990961423 | 0.1110199987696632 | 0.0616299994282770 | F | F | F |
| 0.7213600277433585 | 0.4436900019336107 | 0.0609799995887954 | F | F | F |
| 0.7239000201781849 | 0.7793800235195363 | 0.0617300011113215 | F | F | F |
| 0.0548500008969128 | 0.2779600024177142 | 0.0611100010467140 | F | F | F |
| 0.0548699982635696 | 0.6113299727824142 | 0.0609100013869721 | F | F | F |
| 0.0557399988174794 | 0.9441199898966843 | 0.0569700002542319 | F | F | F |
| 0.3894000053534441 | 0.2770200073944125 | 0.0612200014192723 | F | F | F |
| 0.3885200023536157 | 0.9449700116936768 | 0.0609200000764787 | F | F | F |
| 0.7219600081768291 | 0.2778800130081720 | 0.0612899996210956 | F | F | F |
| 0.7228400111134903 | 0.6104599833518947 | 0.0612800009690204 | F | F | F |
| 0.7218999862732431 | 0.9449999928237744 | 0.0611900016818296 | F | F | F |

|                    |                    |                    |   |   |   |
|--------------------|--------------------|--------------------|---|---|---|
| 0.2224700004002287 | 0.1112700029890163 | 0.0579399988155274 | F | F | F |
| 0.2239000052058842 | 0.4420799910817479 | 0.0698800012383671 | F | F | F |
| 0.2217099964610867 | 0.7781400084212819 | 0.0611599981631770 | F | F | F |
| 0.5554500222519394 | 0.1106600016727199 | 0.0609599985034350 | F | F | F |
| 0.5538799763018645 | 0.4459800124308089 | 0.0648500025197052 | F | F | F |
| 0.5577600002220393 | 0.7759199738370555 | 0.0699200034090950 | F | F | F |
| 0.8886299729346163 | 0.1112200022076308 | 0.0597000010326383 | F | F | F |
| 0.8891900181671417 | 0.4444000124669500 | 0.0609400011618462 | F | F | F |
| 0.8885800242332564 | 0.7773900031831715 | 0.0579899996383304 | F | F | F |
| 0.2204699963058161 | 0.2759700119173587 | 0.0616400018241308 | F | F | F |
| 0.2224200070404621 | 0.6142200231952089 | 0.0697799995553297 | F | F | F |
| 0.2220399975825629 | 0.9445899725293785 | 0.0577399991557783 | F | F | F |
| 0.5561599731237834 | 0.2784900069045193 | 0.0609700009367202 | F | F | F |
| 0.5584899783382440 | 0.6151199936777303 | 0.0699099972694697 | F | F | F |
| 0.5548200011515050 | 0.9423800111137410 | 0.0647599995261743 | F | F | F |
| 0.8888199925564066 | 0.2781499922028985 | 0.0615999996534029 | F | F | F |
| 0.8888300061197185 | 0.6107800006620749 | 0.0590399987973029 | F | F | F |
| 0.8892800212255736 | 0.9450600147559953 | 0.0582900010185554 | F | F | F |
| 0.2705184772190041 | 0.8316718155604936 | 0.2242398748385989 | T | T | T |
| 0.1944927745581485 | 0.7324612558424938 | 0.2528075700276897 | T | T | T |
| 0.2124516938287034 | 0.8536297165994943 | 0.1860859117764112 | T | T | T |
| 0.3495482823622154 | 0.8262976062534556 | 0.2006596581926452 | T | T | T |
| 0.2365281714911024 | 0.7152613576399605 | 0.2817825382444551 | T | T | T |
| 0.1591200907122040 | 0.6669593859092170 | 0.2261915618096031 | T | T | T |
| 0.1317989600954118 | 0.7400915228735993 | 0.2709804233158504 | T | T | T |
| 0.1760125284894678 | 0.8840453464246909 | 0.2034399176887006 | T | T | T |
| 0.3040151692044495 | 0.8994959771159272 | 0.2505327860750022 | T | T | T |

### Structure38

CH<sub>3</sub>CO\*+H<sub>2</sub>O

1.0000000000000000

|                     |                     |                     |
|---------------------|---------------------|---------------------|
| 14.7840003966999998 | 0.0000000000000000  | 0.0000000000000000  |
| -7.3920001983999999 | 12.8033199130999993 | 0.0000000000000000  |
| 0.0000000000000000  | 0.0000000000000000  | 26.7110004425000014 |

|    |   |    |   |   |
|----|---|----|---|---|
| Cu | N | C  | O | H |
| 4  | 9 | 64 | 2 | 5 |

### Selective dynamics

Direct

|                    |                    |                    |   |   |   |
|--------------------|--------------------|--------------------|---|---|---|
| 0.3883999883824316 | 0.6109899878387068 | 0.1237199976883616 | F | F | F |
| 0.4695639373291928 | 0.6212493781956795 | 0.2012968231717038 | T | T | T |
| 0.2840768384622285 | 0.5386424158839971 | 0.1977063044074894 | T | T | T |
| 0.3825282169153792 | 0.7213878518958597 | 0.1922396772014727 | T | T | T |
| 0.3273999989159151 | 0.6724299788206594 | 0.0770300030666817 | F | F | F |
| 0.3273600042078257 | 0.4895400106801233 | 0.0762199982880674 | F | F | F |

|                    |                    |                    |   |   |   |
|--------------------|--------------------|--------------------|---|---|---|
| 0.5102499723826810 | 0.6724500060481091 | 0.0761599987757577 | F | F | F |
| 0.9996700287274507 | 0.0001800000324650 | 0.0573600009216477 | F | F | F |
| 0.0003299999634265 | 0.3344300090962307 | 0.0625099986649431 | F | F | F |
| 0.9996899962509573 | 0.6666100025562471 | 0.0586999989901287 | F | F | F |
| 0.3332400024166660 | 0.0001599999854633 | 0.0586900003380535 | F | F | F |
| 0.6654199958038518 | 0.9995099902101501 | 0.0625599995251847 | F | F | F |
| 0.6666899919723832 | 0.3331600129459886 | 0.0612300001087860 | F | F | F |
| 0.3321700096157301 | 0.3312500119332853 | 0.0634699985367249 | F | F | F |
| 0.6686199903697627 | 0.6676899790852886 | 0.0635500028781806 | F | F | F |
| 0.9991999865008054 | 0.1663299948336885 | 0.0593199990547291 | F | F | F |
| 0.0001500000141448 | 0.5002700090658863 | 0.0620899982600847 | F | F | F |
| 0.9999099969734431 | 0.8333100080615523 | 0.0571499988286135 | F | F | F |
| 0.3328500091896487 | 0.1653199940614059 | 0.0589599981996258 | F | F | F |
| 0.3319799900125986 | 0.8348799943726348 | 0.0628399997826108 | F | F | F |
| 0.6658499836809995 | 0.1663399934903538 | 0.0614599995434091 | F | F | F |
| 0.6657000184196491 | 0.4994199871907909 | 0.0623999982923920 | F | F | F |
| 0.6680499911019240 | 0.8350800275685089 | 0.0631899982792987 | F | F | F |
| 0.1665399968694743 | 0.9999399781380731 | 0.0571300014870246 | F | F | F |
| 0.1647700071264779 | 0.3318099975501880 | 0.0630899965588227 | F | F | F |
| 0.1649599969669993 | 0.6678699851318157 | 0.0628300011305356 | F | F | F |
| 0.4995799959066858 | 0.9996899962566772 | 0.0621200017787373 | F | F | F |
| 0.5004400015054742 | 0.3341600000654878 | 0.0623699985549493 | F | F | F |
| 0.8335300087518434 | 0.0006599999888621 | 0.0593699999149706 | F | F | F |
| 0.8335000276869380 | 0.3339900076717370 | 0.0614399984580416 | F | F | F |
| 0.8345299959310495 | 0.6670100092759697 | 0.0590099990224289 | F | F | F |
| 0.1655199974769772 | 0.1649699956211279 | 0.0588000007106046 | F | F | F |
| 0.1689099967855014 | 0.5010300278786701 | 0.0695900022914344 | F | F | F |
| 0.1661600023717327 | 0.8336899876319350 | 0.0583200007559981 | F | F | F |
| 0.5000299811505329 | 0.1666100025210966 | 0.0600900016626156 | F | F | F |
| 0.4982599914069894 | 0.5016000270702463 | 0.0694800019188762 | F | F | F |
| 0.4988099932978187 | 0.8309299945801385 | 0.0696299970120435 | F | F | F |
| 0.8332399726153312 | 0.1666100025210966 | 0.0610099993636766 | F | F | F |
| 0.8332399726178181 | 0.4998199939886163 | 0.0600900016626156 | F | F | F |
| 0.8348900079967692 | 0.8343399763111563 | 0.0588699989124351 | F | F | F |
| 0.0547900013529556 | 0.1105799972670667 | 0.0582499988478276 | F | F | F |
| 0.0574500001527696 | 0.4450300037547379 | 0.0647099986659398 | F | F | F |
| 0.0552599988734528 | 0.7778099775364282 | 0.0577500015516321 | F | F | F |
| 0.3890799879994375 | 0.1110199987696632 | 0.0590200014557141 | F | F | F |
| 0.3847500086142546 | 0.4413599968097515 | 0.0698899999278808 | F | F | F |
| 0.3856300115637481 | 0.7774099707386029 | 0.0697999968969185 | F | F | F |
| 0.7216899990961423 | 0.1110199987696632 | 0.0616299994282770 | F | F | F |
| 0.7213600277433585 | 0.4436900019336107 | 0.0609799995887954 | F | F | F |
| 0.7239000201781849 | 0.7793800235195363 | 0.0617300011113215 | F | F | F |
| 0.0548500008969128 | 0.2779600024177142 | 0.0611100010467140 | F | F | F |

|                    |                    |                    |   |   |   |
|--------------------|--------------------|--------------------|---|---|---|
| 0.0548699982635696 | 0.6113299727824142 | 0.0609100013869721 | F | F | F |
| 0.0557399988174794 | 0.9441199898966843 | 0.0569700002542319 | F | F | F |
| 0.3894000053534441 | 0.2770200073944125 | 0.0612200014192723 | F | F | F |
| 0.3885200023536157 | 0.9449700116936768 | 0.0609200000764787 | F | F | F |
| 0.7219600081768291 | 0.2778800130081720 | 0.0612899996210956 | F | F | F |
| 0.7228400111134903 | 0.6104599833518947 | 0.0612800009690204 | F | F | F |
| 0.7218999862732431 | 0.9449999928237744 | 0.0611900016818296 | F | F | F |
| 0.2224700004002287 | 0.1112700029890163 | 0.0579399988155274 | F | F | F |
| 0.2239000052058842 | 0.4420799910817479 | 0.0698800012383671 | F | F | F |
| 0.2217099964610867 | 0.7781400084212819 | 0.0611599981631770 | F | F | F |
| 0.5554500222519394 | 0.1106600016727199 | 0.0609599985034350 | F | F | F |
| 0.5538799763018645 | 0.4459800124308089 | 0.0648500025197052 | F | F | F |
| 0.5577600002220393 | 0.7759199738370555 | 0.0699200034090950 | F | F | F |
| 0.8886299729346163 | 0.1112200022076308 | 0.0597000010326383 | F | F | F |
| 0.8891900181671417 | 0.4444000124669500 | 0.0609400011618462 | F | F | F |
| 0.8885800242332564 | 0.7773900031831715 | 0.0579899996383304 | F | F | F |
| 0.2204699963058161 | 0.2759700119173587 | 0.0616400018241308 | F | F | F |
| 0.2224200070404621 | 0.6142200231952089 | 0.0697799995553297 | F | F | F |
| 0.2220399975825629 | 0.9445899725293785 | 0.0577399991557783 | F | F | F |
| 0.5561599731237834 | 0.2784900069045193 | 0.0609700009367202 | F | F | F |
| 0.5584899783382440 | 0.6151199936777303 | 0.0699099972694697 | F | F | F |
| 0.5548200011515050 | 0.9423800111137410 | 0.0647599995261743 | F | F | F |
| 0.8888199925564066 | 0.2781499922028985 | 0.0615999996534029 | F | F | F |
| 0.8888300061197185 | 0.6107800006620749 | 0.0590399987973029 | F | F | F |
| 0.8892800212255736 | 0.9450600147559953 | 0.0582900010185554 | F | F | F |
| 0.2629269864335645 | 0.8218078768726514 | 0.2156172100867216 | T | T | T |
| 0.1829074991766449 | 0.7216905164438501 | 0.2395539426010219 | T | T | T |
| 0.2115156074313790 | 0.9737898531208996 | 0.1784567138104126 | T | T | T |
| 0.3444810725673454 | 0.8265444265511163 | 0.1986252160635638 | T | T | T |
| 0.1808828992085895 | 0.7358814531267746 | 0.2799815017306643 | T | T | T |
| 0.2022528231030510 | 0.6582923024301295 | 0.2336916864831195 | T | T | T |
| 0.1045622689221475 | 0.6982498200874712 | 0.2250845379829883 | T | T | T |
| 0.2103016316358783 | 0.0164382065646028 | 0.2058423494332938 | T | T | T |
| 0.2325496744676952 | 0.9252906425500894 | 0.1950580723230790 | T | T | T |

### Structure39

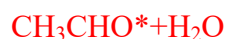

1.0000000000000000

|                     |                     |                     |
|---------------------|---------------------|---------------------|
| 14.7840003966999998 | 0.0000000000000000  | 0.0000000000000000  |
| -7.3920001983999999 | 12.8033199130999993 | 0.0000000000000000  |
| 0.0000000000000000  | 0.0000000000000000  | 26.7110004425000014 |

Cu N C O H  
4 9 64 2 6

Selective dynamics

Direct

|                    |                    |                    |   |   |   |
|--------------------|--------------------|--------------------|---|---|---|
| 0.3883999883824316 | 0.6109899878387068 | 0.1237199976883616 | F | F | F |
| 0.4648606246473940 | 0.6048034029906986 | 0.2010908136597050 | T | T | T |
| 0.2748731560394414 | 0.5310358616224727 | 0.1936197345951261 | T | T | T |
| 0.3921689600731948 | 0.7143449565069115 | 0.1964524909122460 | T | T | T |
| 0.3273999989159151 | 0.6724299788206594 | 0.0770300030666817 | F | F | F |
| 0.3273600042078257 | 0.4895400106801233 | 0.0762199982880674 | F | F | F |
| 0.5102499723826810 | 0.6724500060481091 | 0.0761599987757577 | F | F | F |
| 0.9996700287274507 | 0.0001800000324650 | 0.0573600009216477 | F | F | F |
| 0.0003299999634265 | 0.3344300090962307 | 0.0625099986649431 | F | F | F |
| 0.9996899962509573 | 0.6666100025562471 | 0.0586999989901287 | F | F | F |
| 0.3332400024166660 | 0.0001599999854633 | 0.0586900003380535 | F | F | F |
| 0.6654199958038518 | 0.9995099902101501 | 0.0625599995251847 | F | F | F |
| 0.6666899919723832 | 0.3331600129459886 | 0.0612300001087860 | F | F | F |
| 0.3321700096157301 | 0.3312500119332853 | 0.0634699985367249 | F | F | F |
| 0.6686199903697627 | 0.6676899790852886 | 0.0635500028781806 | F | F | F |
| 0.9991999865008054 | 0.1663299948336885 | 0.0593199990547291 | F | F | F |
| 0.0001500000141448 | 0.5002700090658863 | 0.0620899982600847 | F | F | F |
| 0.9999099969734431 | 0.8333100080615523 | 0.0571499988286135 | F | F | F |
| 0.3328500091896487 | 0.1653199940614059 | 0.0589599981996258 | F | F | F |
| 0.3319799900125986 | 0.8348799943726348 | 0.0628399997826108 | F | F | F |
| 0.6658499836809995 | 0.1663399934903538 | 0.0614599995434091 | F | F | F |
| 0.6657000184196491 | 0.4994199871907909 | 0.0623999982923920 | F | F | F |
| 0.6680499911019240 | 0.8350800275685089 | 0.0631899982792987 | F | F | F |
| 0.1665399968694743 | 0.9999399781380731 | 0.0571300014870246 | F | F | F |
| 0.1647700071264779 | 0.3318099975501880 | 0.0630899965588227 | F | F | F |
| 0.1649599969669993 | 0.6678699851318157 | 0.0628300011305356 | F | F | F |
| 0.4995799959066858 | 0.9996899962566772 | 0.0621200017787373 | F | F | F |
| 0.5004400015054742 | 0.3341600000654878 | 0.0623699985549493 | F | F | F |
| 0.8335300087518434 | 0.0006599999888621 | 0.0593699999149706 | F | F | F |
| 0.8335000276869380 | 0.3339900076717370 | 0.0614399984580416 | F | F | F |
| 0.8345299959310495 | 0.6670100092759697 | 0.0590099990224289 | F | F | F |
| 0.1655199974769772 | 0.1649699956211279 | 0.0588000007106046 | F | F | F |
| 0.1689099967855014 | 0.5010300278786701 | 0.0695900022914344 | F | F | F |
| 0.1661600023717327 | 0.8336899876319350 | 0.0583200007559981 | F | F | F |
| 0.5000299811505329 | 0.1666100025210966 | 0.0600900016626156 | F | F | F |
| 0.4982599914069894 | 0.5016000270702463 | 0.0694800019188762 | F | F | F |
| 0.4988099932978187 | 0.8309299945801385 | 0.0696299970120435 | F | F | F |
| 0.8332399726153312 | 0.1666100025210966 | 0.0610099993636766 | F | F | F |
| 0.8332399726178181 | 0.4998199939886163 | 0.0600900016626156 | F | F | F |
| 0.8348900079967692 | 0.8343399763111563 | 0.0588699989124351 | F | F | F |
| 0.0547900013529556 | 0.1105799972670667 | 0.0582499988478276 | F | F | F |
| 0.0574500001527696 | 0.4450300037547379 | 0.0647099986659398 | F | F | F |
| 0.0552599988734528 | 0.7778099775364282 | 0.0577500015516321 | F | F | F |

|                    |                    |                    |   |   |   |
|--------------------|--------------------|--------------------|---|---|---|
| 0.3890799879994375 | 0.1110199987696632 | 0.0590200014557141 | F | F | F |
| 0.3847500086142546 | 0.4413599968097515 | 0.0698899999278808 | F | F | F |
| 0.3856300115637481 | 0.7774099707386029 | 0.0697999968969185 | F | F | F |
| 0.7216899990961423 | 0.1110199987696632 | 0.0616299994282770 | F | F | F |
| 0.7213600277433585 | 0.4436900019336107 | 0.0609799995887954 | F | F | F |
| 0.7239000201781849 | 0.7793800235195363 | 0.0617300011113215 | F | F | F |
| 0.0548500008969128 | 0.2779600024177142 | 0.0611100010467140 | F | F | F |
| 0.0548699982635696 | 0.6113299727824142 | 0.0609100013869721 | F | F | F |
| 0.0557399988174794 | 0.9441199898966843 | 0.0569700002542319 | F | F | F |
| 0.3894000053534441 | 0.2770200073944125 | 0.0612200014192723 | F | F | F |
| 0.3885200023536157 | 0.9449700116936768 | 0.0609200000764787 | F | F | F |
| 0.7219600081768291 | 0.2778800130081720 | 0.0612899996210956 | F | F | F |
| 0.7228400111134903 | 0.6104599833518947 | 0.0612800009690204 | F | F | F |
| 0.7218999862732431 | 0.9449999928237744 | 0.0611900016818296 | F | F | F |
| 0.2224700004002287 | 0.1112700029890163 | 0.0579399988155274 | F | F | F |
| 0.2239000052058842 | 0.4420799910817479 | 0.0698800012383671 | F | F | F |
| 0.2217099964610867 | 0.7781400084212819 | 0.0611599981631770 | F | F | F |
| 0.5554500222519394 | 0.1106600016727199 | 0.0609599985034350 | F | F | F |
| 0.5538799763018645 | 0.4459800124308089 | 0.0648500025197052 | F | F | F |
| 0.5577600002220393 | 0.7759199738370555 | 0.0699200034090950 | F | F | F |
| 0.8886299729346163 | 0.1112200022076308 | 0.0597000010326383 | F | F | F |
| 0.8891900181671417 | 0.4444000124669500 | 0.0609400011618462 | F | F | F |
| 0.8885800242332564 | 0.7773900031831715 | 0.0579899996383304 | F | F | F |
| 0.2204699963058161 | 0.2759700119173587 | 0.0616400018241308 | F | F | F |
| 0.2224200070404621 | 0.6142200231952089 | 0.0697799995553297 | F | F | F |
| 0.2220399975825629 | 0.9445899725293785 | 0.0577399991557783 | F | F | F |
| 0.5561599731237834 | 0.2784900069045193 | 0.0609700009367202 | F | F | F |
| 0.5584899783382440 | 0.6151199936777303 | 0.0699099972694697 | F | F | F |
| 0.5548200011515050 | 0.9423800111137410 | 0.0647599995261743 | F | F | F |
| 0.8888199925564066 | 0.2781499922028985 | 0.0615999996534029 | F | F | F |
| 0.8888300061197185 | 0.6107800006620749 | 0.0590399987973029 | F | F | F |
| 0.8892800212255736 | 0.9450600147559953 | 0.0582900010185554 | F | F | F |
| 0.3150111624452654 | 0.8334831016882869 | 0.2466624865518805 | T | T | T |
| 0.2310833872199345 | 0.7404237864680248 | 0.2724881139586914 | T | T | T |
| 0.1684636217824755 | 0.8996959510867953 | 0.1911523180454489 | T | T | T |
| 0.3819408339438923 | 0.8310456545605323 | 0.2186526621043217 | T | T | T |
| 0.2589603400583127 | 0.7314875506903465 | 0.3094861880641430 | T | T | T |
| 0.2111392940926350 | 0.6690985827542822 | 0.2507448191638864 | T | T | T |
| 0.1620480527758859 | 0.7487022645394763 | 0.2784107226001339 | T | T | T |
| 0.1220275781618468 | 0.9277192922564416 | 0.1960741653672690 | T | T | T |
| 0.3193131372286991 | 0.9096350347662920 | 0.2513893706711380 | T | T | T |
| 0.1737840445991609 | 0.8963827755722105 | 0.1548730635682532 | T | T | T |

Structure40

CH<sub>3</sub>CHOHO\*H

1.0000000000000000

|                     |                     |                     |
|---------------------|---------------------|---------------------|
| 14.7840003966999998 | 0.0000000000000000  | 0.0000000000000000  |
| -7.3920001983999999 | 12.8033199130999993 | 0.0000000000000000  |
| 0.0000000000000000  | 0.0000000000000000  | 26.7110004425000014 |

|    |   |    |   |   |
|----|---|----|---|---|
| Cu | N | C  | O | H |
| 4  | 9 | 64 | 2 | 6 |

Selective dynamics

Direct

|                    |                    |                    |   |   |   |
|--------------------|--------------------|--------------------|---|---|---|
| 0.3883999883824316 | 0.6109899878387068 | 0.1237199976883616 | F | F | F |
| 0.4772723941839648 | 0.6299365847910584 | 0.2007291099232602 | T | T | T |
| 0.2868232584173071 | 0.5348218876448382 | 0.1977597637765525 | T | T | T |
| 0.3840912320429274 | 0.7197349509441580 | 0.1906350036791457 | T | T | T |
| 0.3273999989159151 | 0.6724299788206594 | 0.0770300030666817 | F | F | F |
| 0.3273600042078257 | 0.4895400106801233 | 0.0762199982880674 | F | F | F |
| 0.5102499723826810 | 0.6724500060481091 | 0.0761599987757577 | F | F | F |
| 0.9996700287274507 | 0.0001800000324650 | 0.0573600009216477 | F | F | F |
| 0.0003299999634265 | 0.3344300090962307 | 0.0625099986649431 | F | F | F |
| 0.9996899962509573 | 0.6666100025562471 | 0.0586999989901287 | F | F | F |
| 0.3332400024166660 | 0.0001599999854633 | 0.0586900003380535 | F | F | F |
| 0.6654199958038518 | 0.9995099902101501 | 0.0625599995251847 | F | F | F |
| 0.6666899919723832 | 0.3331600129459886 | 0.0612300001087860 | F | F | F |
| 0.3321700096157301 | 0.3312500119332853 | 0.0634699985367249 | F | F | F |
| 0.6686199903697627 | 0.6676899790852886 | 0.0635500028781806 | F | F | F |
| 0.9991999865008054 | 0.1663299948336885 | 0.0593199990547291 | F | F | F |
| 0.0001500000141448 | 0.5002700090658863 | 0.0620899982600847 | F | F | F |
| 0.9999099969734431 | 0.8333100080615523 | 0.0571499988286135 | F | F | F |
| 0.3328500091896487 | 0.1653199940614059 | 0.0589599981996258 | F | F | F |
| 0.3319799900125986 | 0.8348799943726348 | 0.0628399997826108 | F | F | F |
| 0.6658499836809995 | 0.1663399934903538 | 0.0614599995434091 | F | F | F |
| 0.6657000184196491 | 0.4994199871907909 | 0.0623999982923920 | F | F | F |
| 0.6680499911019240 | 0.8350800275685089 | 0.0631899982792987 | F | F | F |
| 0.1665399968694743 | 0.9999399781380731 | 0.0571300014870246 | F | F | F |
| 0.1647700071264779 | 0.3318099975501880 | 0.0630899965588227 | F | F | F |
| 0.1649599969669993 | 0.6678699851318157 | 0.0628300011305356 | F | F | F |
| 0.4995799959066858 | 0.9996899962566772 | 0.0621200017787373 | F | F | F |
| 0.5004400015054742 | 0.3341600000654878 | 0.0623699985549493 | F | F | F |
| 0.8335300087518434 | 0.0006599999888621 | 0.0593699999149706 | F | F | F |
| 0.8335000276869380 | 0.3339900076717370 | 0.0614399984580416 | F | F | F |
| 0.8345299959310495 | 0.6670100092759697 | 0.0590099990224289 | F | F | F |
| 0.1655199974769772 | 0.1649699956211279 | 0.0588000007106046 | F | F | F |
| 0.1689099967855014 | 0.5010300278786701 | 0.0695900022914344 | F | F | F |
| 0.1661600023717327 | 0.8336899876319350 | 0.0583200007559981 | F | F | F |
| 0.5000299811505329 | 0.1666100025210966 | 0.0600900016626156 | F | F | F |

|                    |                    |                    |   |   |   |
|--------------------|--------------------|--------------------|---|---|---|
| 0.4982599914069894 | 0.5016000270702463 | 0.0694800019188762 | F | F | F |
| 0.4988099932978187 | 0.8309299945801385 | 0.0696299970120435 | F | F | F |
| 0.8332399726153312 | 0.1666100025210966 | 0.0610099993636766 | F | F | F |
| 0.8332399726178181 | 0.4998199939886163 | 0.0600900016626156 | F | F | F |
| 0.8348900079967692 | 0.8343399763111563 | 0.0588699989124351 | F | F | F |
| 0.0547900013529556 | 0.1105799972670667 | 0.0582499988478276 | F | F | F |
| 0.0574500001527696 | 0.4450300037547379 | 0.0647099986659398 | F | F | F |
| 0.0552599988734528 | 0.7778099775364282 | 0.0577500015516321 | F | F | F |
| 0.3890799879994375 | 0.1110199987696632 | 0.0590200014557141 | F | F | F |
| 0.3847500086142546 | 0.4413599968097515 | 0.0698899999278808 | F | F | F |
| 0.3856300115637481 | 0.7774099707386029 | 0.0697999968969185 | F | F | F |
| 0.7216899990961423 | 0.1110199987696632 | 0.0616299994282770 | F | F | F |
| 0.7213600277433585 | 0.4436900019336107 | 0.0609799995887954 | F | F | F |
| 0.7239000201781849 | 0.7793800235195363 | 0.0617300011113215 | F | F | F |
| 0.0548500008969128 | 0.2779600024177142 | 0.0611100010467140 | F | F | F |
| 0.0548699982635696 | 0.6113299727824142 | 0.0609100013869721 | F | F | F |
| 0.0557399988174794 | 0.9441199898966843 | 0.0569700002542319 | F | F | F |
| 0.3894000053534441 | 0.2770200073944125 | 0.0612200014192723 | F | F | F |
| 0.3885200023536157 | 0.9449700116936768 | 0.0609200000764787 | F | F | F |
| 0.7219600081768291 | 0.2778800130081720 | 0.0612899996210956 | F | F | F |
| 0.7228400111134903 | 0.6104599833518947 | 0.0612800009690204 | F | F | F |
| 0.7218999862732431 | 0.9449999928237744 | 0.0611900016818296 | F | F | F |
| 0.2224700004002287 | 0.1112700029890163 | 0.0579399988155274 | F | F | F |
| 0.2239000052058842 | 0.4420799910817479 | 0.0698800012383671 | F | F | F |
| 0.2217099964610867 | 0.7781400084212819 | 0.0611599981631770 | F | F | F |
| 0.5554500222519394 | 0.1106600016727199 | 0.0609599985034350 | F | F | F |
| 0.5538799763018645 | 0.4459800124308089 | 0.0648500025197052 | F | F | F |
| 0.5577600002220393 | 0.7759199738370555 | 0.0699200034090950 | F | F | F |
| 0.8886299729346163 | 0.1112200022076308 | 0.0597000010326383 | F | F | F |
| 0.8891900181671417 | 0.4444000124669500 | 0.0609400011618462 | F | F | F |
| 0.8885800242332564 | 0.7773900031831715 | 0.0579899996383304 | F | F | F |
| 0.2204699963058161 | 0.2759700119173587 | 0.0616400018241308 | F | F | F |
| 0.2224200070404621 | 0.6142200231952089 | 0.0697799995553297 | F | F | F |
| 0.2220399975825629 | 0.9445899725293785 | 0.0577399991557783 | F | F | F |
| 0.5561599731237834 | 0.2784900069045193 | 0.0609700009367202 | F | F | F |
| 0.5584899783382440 | 0.6151199936777303 | 0.0699099972694697 | F | F | F |
| 0.5548200011515050 | 0.9423800111137410 | 0.0647599995261743 | F | F | F |
| 0.8888199925564066 | 0.2781499922028985 | 0.0615999996534029 | F | F | F |
| 0.8888300061197185 | 0.6107800006620749 | 0.0590399987973029 | F | F | F |
| 0.8892800212255736 | 0.9450600147559953 | 0.0582900010185554 | F | F | F |
| 0.2765195325757848 | 0.8424895305477071 | 0.2150366771134804 | T | T | T |
| 0.2656322430064844 | 0.8084227607392624 | 0.2690009391171762 | T | T | T |
| 0.1891468667854466 | 0.7688378715908489 | 0.1886140115181157 | T | T | T |
| 0.3737959176528142 | 0.8488615008661988 | 0.1960567039346766 | T | T | T |



|                    |                    |                    |   |   |   |
|--------------------|--------------------|--------------------|---|---|---|
| 0.3331287752877500 | 0.8642262095004566 | 0.2910742805096120 | T | T | T |
| 0.2593424934091613 | 0.7310343121098466 | 0.2706961535445971 | T | T | T |
| 0.1942073068495147 | 0.8019550990262669 | 0.2848320168148238 | T | T | T |
| 0.1884919613462047 | 0.7942667132469955 | 0.1549194716950464 | T | T | T |
| 0.2885703755260926 | 0.9220197314152568 | 0.2106932966501604 | T | T | T |
| 0.3914988375223561 | 0.8844878204788080 | 0.1635891320531192 | T | T | T |

Structure41

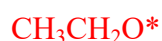

1.0000000000000000

|                     |                     |                     |
|---------------------|---------------------|---------------------|
| 14.7840003966999998 | 0.0000000000000000  | 0.0000000000000000  |
| -7.3920001983999999 | 12.8033199130999993 | 0.0000000000000000  |
| 0.0000000000000000  | 0.0000000000000000  | 26.7110004425000014 |

|    |   |    |   |   |
|----|---|----|---|---|
| Cu | N | C  | O | H |
| 4  | 9 | 64 | 1 | 4 |

Selective dynamics

Direct

|                    |                    |                    |   |   |   |
|--------------------|--------------------|--------------------|---|---|---|
| 0.3883999883824316 | 0.6109899878387068 | 0.1237199976883616 | F | F | F |
| 0.4596043953092761 | 0.6046801921152019 | 0.2025707438562477 | T | T | T |
| 0.2705346642843558 | 0.5365114117445404 | 0.1927103556021999 | T | T | T |
| 0.3929704661126489 | 0.7187567568592818 | 0.1943406005077922 | T | T | T |
| 0.3273999989159151 | 0.6724299788206594 | 0.0770300030666817 | F | F | F |
| 0.3273600042078257 | 0.4895400106801233 | 0.0762199982880674 | F | F | F |
| 0.5102499723826810 | 0.6724500060481091 | 0.0761599987757577 | F | F | F |
| 0.9996700287274507 | 0.0001800000324650 | 0.0573600009216477 | F | F | F |
| 0.0003299999634265 | 0.3344300090962307 | 0.0625099986649431 | F | F | F |
| 0.9996899962509573 | 0.6666100025562471 | 0.0586999989901287 | F | F | F |
| 0.3332400024166660 | 0.0001599999854633 | 0.0586900003380535 | F | F | F |
| 0.6654199958038518 | 0.9995099902101501 | 0.0625599995251847 | F | F | F |
| 0.6666899919723832 | 0.3331600129459886 | 0.0612300001087860 | F | F | F |
| 0.3321700096157301 | 0.3312500119332853 | 0.0634699985367249 | F | F | F |
| 0.6686199903697627 | 0.6676899790852886 | 0.0635500028781806 | F | F | F |
| 0.9991999865008054 | 0.1663299948336885 | 0.0593199990547291 | F | F | F |
| 0.0001500000141448 | 0.5002700090658863 | 0.0620899982600847 | F | F | F |
| 0.9999099969734431 | 0.8333100080615523 | 0.0571499988286135 | F | F | F |
| 0.3328500091896487 | 0.1653199940614059 | 0.0589599981996258 | F | F | F |
| 0.3319799900125986 | 0.8348799943726348 | 0.0628399997826108 | F | F | F |
| 0.6658499836809995 | 0.1663399934903538 | 0.0614599995434091 | F | F | F |
| 0.6657000184196491 | 0.4994199871907909 | 0.0623999982923920 | F | F | F |
| 0.6680499911019240 | 0.8350800275685089 | 0.0631899982792987 | F | F | F |
| 0.1665399968694743 | 0.9999399781380731 | 0.0571300014870246 | F | F | F |
| 0.1647700071264779 | 0.3318099975501880 | 0.0630899965588227 | F | F | F |
| 0.1649599969669993 | 0.6678699851318157 | 0.0628300011305356 | F | F | F |
| 0.4995799959066858 | 0.9996899962566772 | 0.0621200017787373 | F | F | F |

|                    |                    |                    |   |   |   |
|--------------------|--------------------|--------------------|---|---|---|
| 0.5004400015054742 | 0.3341600000654878 | 0.0623699985549493 | F | F | F |
| 0.8335300087518434 | 0.0006599999888621 | 0.0593699999149706 | F | F | F |
| 0.8335000276869380 | 0.3339900076717370 | 0.0614399984580416 | F | F | F |
| 0.8345299959310495 | 0.6670100092759697 | 0.0590099990224289 | F | F | F |
| 0.1655199974769772 | 0.1649699956211279 | 0.0588000007106046 | F | F | F |
| 0.1689099967855014 | 0.5010300278786701 | 0.0695900022914344 | F | F | F |
| 0.1661600023717327 | 0.8336899876319350 | 0.0583200007559981 | F | F | F |
| 0.5000299811505329 | 0.1666100025210966 | 0.0600900016626156 | F | F | F |
| 0.4982599914069894 | 0.5016000270702463 | 0.0694800019188762 | F | F | F |
| 0.4988099932978187 | 0.8309299945801385 | 0.0696299970120435 | F | F | F |
| 0.8332399726153312 | 0.1666100025210966 | 0.0610099993636766 | F | F | F |
| 0.8332399726178181 | 0.4998199939886163 | 0.0600900016626156 | F | F | F |
| 0.8348900079967692 | 0.8343399763111563 | 0.0588699989124351 | F | F | F |
| 0.0547900013529556 | 0.1105799972670667 | 0.0582499988478276 | F | F | F |
| 0.0574500001527696 | 0.4450300037547379 | 0.0647099986659398 | F | F | F |
| 0.0552599988734528 | 0.7778099775364282 | 0.0577500015516321 | F | F | F |
| 0.3890799879994375 | 0.1110199987696632 | 0.0590200014557141 | F | F | F |
| 0.3847500086142546 | 0.4413599968097515 | 0.0698899999278808 | F | F | F |
| 0.3856300115637481 | 0.7774099707386029 | 0.0697999968969185 | F | F | F |
| 0.7216899990961423 | 0.1110199987696632 | 0.0616299994282770 | F | F | F |
| 0.7213600277433585 | 0.4436900019336107 | 0.0609799995887954 | F | F | F |
| 0.7239000201781849 | 0.7793800235195363 | 0.0617300011113215 | F | F | F |
| 0.0548500008969128 | 0.2779600024177142 | 0.0611100010467140 | F | F | F |
| 0.0548699982635696 | 0.6113299727824142 | 0.0609100013869721 | F | F | F |
| 0.0557399988174794 | 0.9441199898966843 | 0.0569700002542319 | F | F | F |
| 0.3894000053534441 | 0.2770200073944125 | 0.0612200014192723 | F | F | F |
| 0.3885200023536157 | 0.9449700116936768 | 0.0609200000764787 | F | F | F |
| 0.7219600081768291 | 0.2778800130081720 | 0.0612899996210956 | F | F | F |
| 0.7228400111134903 | 0.6104599833518947 | 0.0612800009690204 | F | F | F |
| 0.7218999862732431 | 0.9449999928237744 | 0.0611900016818296 | F | F | F |
| 0.2224700004002287 | 0.1112700029890163 | 0.0579399988155274 | F | F | F |
| 0.2239000052058842 | 0.4420799910817479 | 0.0698800012383671 | F | F | F |
| 0.2217099964610867 | 0.7781400084212819 | 0.0611599981631770 | F | F | F |
| 0.5554500222519394 | 0.1106600016727199 | 0.0609599985034350 | F | F | F |
| 0.5538799763018645 | 0.4459800124308089 | 0.0648500025197052 | F | F | F |
| 0.5577600002220393 | 0.7759199738370555 | 0.0699200034090950 | F | F | F |
| 0.8886299729346163 | 0.1112200022076308 | 0.0597000010326383 | F | F | F |
| 0.8891900181671417 | 0.4444000124669500 | 0.0609400011618462 | F | F | F |
| 0.8885800242332564 | 0.7773900031831715 | 0.0579899996383304 | F | F | F |
| 0.2204699963058161 | 0.2759700119173587 | 0.0616400018241308 | F | F | F |
| 0.2224200070404621 | 0.6142200231952089 | 0.0697799995553297 | F | F | F |
| 0.2220399975825629 | 0.9445899725293785 | 0.0577399991557783 | F | F | F |
| 0.5561599731237834 | 0.2784900069045193 | 0.0609700009367202 | F | F | F |
| 0.5584899783382440 | 0.6151199936777303 | 0.0699099972694697 | F | F | F |

|                    |                    |                    |   |   |   |
|--------------------|--------------------|--------------------|---|---|---|
| 0.5548200011515050 | 0.9423800111137410 | 0.0647599995261743 | F | F | F |
| 0.8888199925564066 | 0.2781499922028985 | 0.0615999996534029 | F | F | F |
| 0.8888300061197185 | 0.6107800006620749 | 0.0590399987973029 | F | F | F |
| 0.8892800212255736 | 0.9450600147559953 | 0.0582900010185554 | F | F | F |
| 0.3169853944998203 | 0.8368916815209246 | 0.2447859496066516 | T | T | T |
| 0.2474213684083037 | 0.7460302299371021 | 0.2764490869378008 | T | T | T |
| 0.3793170577244047 | 0.8347257042980065 | 0.2131314109379504 | T | T | T |
| 0.2937189929333158 | 0.7287811555059380 | 0.3032118436995728 | T | T | T |
| 0.2066391573509804 | 0.6752707488928772 | 0.2524256709958465 | T | T | T |
| 0.1907283710797811 | 0.7586152473966554 | 0.2973218901908217 | T | T | T |
| 0.3140957436773210 | 0.9098954830716061 | 0.2474905604593713 | T | T | T |

### Structure42

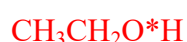

1.0000000000000000

|                     |                     |                     |
|---------------------|---------------------|---------------------|
| 14.7840003966999998 | 0.0000000000000000  | 0.0000000000000000  |
| -7.3920001983999999 | 12.8033199130999993 | 0.0000000000000000  |
| 0.0000000000000000  | 0.0000000000000000  | 26.7110004425000014 |

Cu N C O H  
4 9 64 1 6

Selective dynamics

Direct

|                    |                    |                    |   |   |   |
|--------------------|--------------------|--------------------|---|---|---|
| 0.3883999883824316 | 0.6109899878387068 | 0.1237199976883616 | F | F | F |
| 0.4767606302833553 | 0.6224468775089463 | 0.2000064597543145 | T | T | T |
| 0.2844670184113550 | 0.5350426964698241 | 0.1970176943154922 | T | T | T |
| 0.3919186497416836 | 0.7202929323357500 | 0.1919784810063168 | T | T | T |
| 0.3273999989159151 | 0.6724299788206594 | 0.0770300030666817 | F | F | F |
| 0.3273600042078257 | 0.4895400106801233 | 0.0762199982880674 | F | F | F |
| 0.5102499723826810 | 0.6724500060481091 | 0.0761599987757577 | F | F | F |
| 0.9996700287274507 | 0.0001800000324650 | 0.0573600009216477 | F | F | F |
| 0.0003299999634265 | 0.3344300090962307 | 0.0625099986649431 | F | F | F |
| 0.9996899962509573 | 0.6666100025562471 | 0.0586999989901287 | F | F | F |
| 0.3332400024166660 | 0.0001599999854633 | 0.0586900003380535 | F | F | F |
| 0.6654199958038518 | 0.9995099902101501 | 0.0625599995251847 | F | F | F |
| 0.6666899919723832 | 0.3331600129459886 | 0.0612300001087860 | F | F | F |
| 0.3321700096157301 | 0.3312500119332853 | 0.0634699985367249 | F | F | F |
| 0.6686199903697627 | 0.6676899790852886 | 0.0635500028781806 | F | F | F |
| 0.9991999865008054 | 0.1663299948336885 | 0.0593199990547291 | F | F | F |
| 0.0001500000141448 | 0.5002700090658863 | 0.0620899982600847 | F | F | F |
| 0.9999099969734431 | 0.8333100080615523 | 0.0571499988286135 | F | F | F |
| 0.3328500091896487 | 0.1653199940614059 | 0.0589599981996258 | F | F | F |
| 0.3319799900125986 | 0.8348799943726348 | 0.0628399997826108 | F | F | F |
| 0.6658499836809995 | 0.1663399934903538 | 0.0614599995434091 | F | F | F |
| 0.6657000184196491 | 0.4994199871907909 | 0.0623999982923920 | F | F | F |

|                    |                    |                    |   |   |   |
|--------------------|--------------------|--------------------|---|---|---|
| 0.6680499911019240 | 0.8350800275685089 | 0.0631899982792987 | F | F | F |
| 0.1665399968694743 | 0.9999399781380731 | 0.0571300014870246 | F | F | F |
| 0.1647700071264779 | 0.3318099975501880 | 0.0630899965588227 | F | F | F |
| 0.1649599969669993 | 0.6678699851318157 | 0.0628300011305356 | F | F | F |
| 0.4995799959066858 | 0.9996899962566772 | 0.0621200017787373 | F | F | F |
| 0.5004400015054742 | 0.3341600000654878 | 0.0623699985549493 | F | F | F |
| 0.8335300087518434 | 0.0006599999888621 | 0.0593699999149706 | F | F | F |
| 0.8335000276869380 | 0.3339900076717370 | 0.0614399984580416 | F | F | F |
| 0.8345299959310495 | 0.6670100092759697 | 0.0590099990224289 | F | F | F |
| 0.1655199974769772 | 0.1649699956211279 | 0.0588000007106046 | F | F | F |
| 0.1689099967855014 | 0.5010300278786701 | 0.0695900022914344 | F | F | F |
| 0.1661600023717327 | 0.8336899876319350 | 0.0583200007559981 | F | F | F |
| 0.5000299811505329 | 0.1666100025210966 | 0.0600900016626156 | F | F | F |
| 0.4982599914069894 | 0.5016000270702463 | 0.0694800019188762 | F | F | F |
| 0.4988099932978187 | 0.8309299945801385 | 0.0696299970120435 | F | F | F |
| 0.8332399726153312 | 0.1666100025210966 | 0.0610099993636766 | F | F | F |
| 0.8332399726178181 | 0.4998199939886163 | 0.0600900016626156 | F | F | F |
| 0.8348900079967692 | 0.8343399763111563 | 0.0588699989124351 | F | F | F |
| 0.0547900013529556 | 0.1105799972670667 | 0.0582499988478276 | F | F | F |
| 0.0574500001527696 | 0.4450300037547379 | 0.0647099986659398 | F | F | F |
| 0.0552599988734528 | 0.7778099775364282 | 0.0577500015516321 | F | F | F |
| 0.3890799879994375 | 0.1110199987696632 | 0.0590200014557141 | F | F | F |
| 0.3847500086142546 | 0.4413599968097515 | 0.0698899999278808 | F | F | F |
| 0.3856300115637481 | 0.7774099707386029 | 0.0697999968969185 | F | F | F |
| 0.7216899990961423 | 0.1110199987696632 | 0.0616299994282770 | F | F | F |
| 0.7213600277433585 | 0.4436900019336107 | 0.0609799995887954 | F | F | F |
| 0.7239000201781849 | 0.7793800235195363 | 0.0617300011113215 | F | F | F |
| 0.0548500008969128 | 0.2779600024177142 | 0.0611100010467140 | F | F | F |
| 0.0548699982635696 | 0.6113299727824142 | 0.0609100013869721 | F | F | F |
| 0.0557399988174794 | 0.9441199898966843 | 0.0569700002542319 | F | F | F |
| 0.3894000053534441 | 0.2770200073944125 | 0.0612200014192723 | F | F | F |
| 0.3885200023536157 | 0.9449700116936768 | 0.0609200000764787 | F | F | F |
| 0.7219600081768291 | 0.2778800130081720 | 0.0612899996210956 | F | F | F |
| 0.7228400111134903 | 0.6104599833518947 | 0.0612800009690204 | F | F | F |
| 0.7218999862732431 | 0.9449999928237744 | 0.0611900016818296 | F | F | F |
| 0.2224700004002287 | 0.1112700029890163 | 0.0579399988155274 | F | F | F |
| 0.2239000052058842 | 0.4420799910817479 | 0.0698800012383671 | F | F | F |
| 0.2217099964610867 | 0.7781400084212819 | 0.0611599981631770 | F | F | F |
| 0.5554500222519394 | 0.1106600016727199 | 0.0609599985034350 | F | F | F |
| 0.5538799763018645 | 0.4459800124308089 | 0.0648500025197052 | F | F | F |
| 0.5577600002220393 | 0.7759199738370555 | 0.0699200034090950 | F | F | F |
| 0.8886299729346163 | 0.1112200022076308 | 0.0597000010326383 | F | F | F |
| 0.8891900181671417 | 0.4444000124669500 | 0.0609400011618462 | F | F | F |
| 0.8885800242332564 | 0.7773900031831715 | 0.0579899996383304 | F | F | F |

|                    |                    |                    |   |   |   |
|--------------------|--------------------|--------------------|---|---|---|
| 0.2204699963058161 | 0.2759700119173587 | 0.0616400018241308 | F | F | F |
| 0.2224200070404621 | 0.6142200231952089 | 0.0697799995553297 | F | F | F |
| 0.2220399975825629 | 0.9445899725293785 | 0.0577399991557783 | F | F | F |
| 0.5561599731237834 | 0.2784900069045193 | 0.0609700009367202 | F | F | F |
| 0.5584899783382440 | 0.6151199936777303 | 0.0699099972694697 | F | F | F |
| 0.5548200011515050 | 0.9423800111137410 | 0.0647599995261743 | F | F | F |
| 0.8888199925564066 | 0.2781499922028985 | 0.0615999996534029 | F | F | F |
| 0.8888300061197185 | 0.6107800006620749 | 0.0590399987973029 | F | F | F |
| 0.8892800212255736 | 0.9450600147559953 | 0.0582900010185554 | F | F | F |
| 0.3317045268346591 | 0.8610240993497179 | 0.2483708463857186 | T | T | T |
| 0.2358180023810314 | 0.7632355472887478 | 0.2668965020640841 | T | T | T |
| 0.3727544188514800 | 0.8437729056009979 | 0.2015253983454232 | T | T | T |
| 0.2524129915455309 | 0.6987756050404293 | 0.2706296019977566 | T | T | T |
| 0.1691823050412700 | 0.7378106395481537 | 0.2413265766850067 | T | T | T |
| 0.2126442353874427 | 0.7777941422398564 | 0.3037949380007956 | T | T | T |
| 0.3162655177073744 | 0.9255783290627082 | 0.2419097144990589 | T | T | T |
| 0.3968529185577816 | 0.8877623588340980 | 0.2749216342050113 | T | T | T |
| 0.3335614355267980 | 0.8481076716106128 | 0.1731223470237350 | T | T | T |

### Structure43

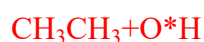

1.0000000000000000

|                     |                     |                     |
|---------------------|---------------------|---------------------|
| 14.7840003966999998 | 0.0000000000000000  | 0.0000000000000000  |
| -7.3920001983999999 | 12.8033199130999993 | 0.0000000000000000  |
| 0.0000000000000000  | 0.0000000000000000  | 26.7110004425000014 |

|    |   |    |   |   |
|----|---|----|---|---|
| Cu | N | C  | O | H |
| 4  | 9 | 64 | 1 | 7 |

Selective dynamics

Direct

|                    |                    |                    |   |   |   |
|--------------------|--------------------|--------------------|---|---|---|
| 0.3883999883824316 | 0.6109899878387068 | 0.1237199976883616 | F | F | F |
| 0.4634080160917425 | 0.6000102909223368 | 0.2003098206193247 | T | T | T |
| 0.2926285877648873 | 0.5744336770838464 | 0.1995092424778430 | T | T | T |
| 0.4382611989665887 | 0.7463391139893893 | 0.1910820152421392 | T | T | T |
| 0.3273999989159151 | 0.6724299788206594 | 0.0770300030666817 | F | F | F |
| 0.3273600042078257 | 0.4895400106801233 | 0.0762199982880674 | F | F | F |
| 0.5102499723826810 | 0.6724500060481091 | 0.0761599987757577 | F | F | F |
| 0.9996700287274507 | 0.0001800000324650 | 0.0573600009216477 | F | F | F |
| 0.0003299999634265 | 0.3344300090962307 | 0.0625099986649431 | F | F | F |
| 0.9996899962509573 | 0.6666100025562471 | 0.0586999989901287 | F | F | F |
| 0.3332400024166660 | 0.0001599999854633 | 0.0586900003380535 | F | F | F |
| 0.6654199958038518 | 0.9995099902101501 | 0.0625599995251847 | F | F | F |
| 0.6666899919723832 | 0.3331600129459886 | 0.0612300001087860 | F | F | F |
| 0.3321700096157301 | 0.3312500119332853 | 0.0634699985367249 | F | F | F |
| 0.6686199903697627 | 0.6676899790852886 | 0.0635500028781806 | F | F | F |

|                    |                    |                    |   |   |   |
|--------------------|--------------------|--------------------|---|---|---|
| 0.9991999865008054 | 0.1663299948336885 | 0.0593199990547291 | F | F | F |
| 0.0001500000141448 | 0.5002700090658863 | 0.0620899982600847 | F | F | F |
| 0.9999099969734431 | 0.8333100080615523 | 0.0571499988286135 | F | F | F |
| 0.3328500091896487 | 0.1653199940614059 | 0.0589599981996258 | F | F | F |
| 0.3319799900125986 | 0.8348799943726348 | 0.0628399997826108 | F | F | F |
| 0.6658499836809995 | 0.1663399934903538 | 0.0614599995434091 | F | F | F |
| 0.6657000184196491 | 0.4994199871907909 | 0.0623999982923920 | F | F | F |
| 0.6680499911019240 | 0.8350800275685089 | 0.0631899982792987 | F | F | F |
| 0.1665399968694743 | 0.9999399781380731 | 0.0571300014870246 | F | F | F |
| 0.1647700071264779 | 0.3318099975501880 | 0.0630899965588227 | F | F | F |
| 0.1649599969669993 | 0.6678699851318157 | 0.0628300011305356 | F | F | F |
| 0.4995799959066858 | 0.9996899962566772 | 0.0621200017787373 | F | F | F |
| 0.5004400015054742 | 0.3341600000654878 | 0.0623699985549493 | F | F | F |
| 0.8335300087518434 | 0.0006599999888621 | 0.0593699999149706 | F | F | F |
| 0.8335000276869380 | 0.3339900076717370 | 0.0614399984580416 | F | F | F |
| 0.8345299959310495 | 0.6670100092759697 | 0.0590099990224289 | F | F | F |
| 0.1655199974769772 | 0.1649699956211279 | 0.0588000007106046 | F | F | F |
| 0.1689099967855014 | 0.5010300278786701 | 0.0695900022914344 | F | F | F |
| 0.1661600023717327 | 0.8336899876319350 | 0.0583200007559981 | F | F | F |
| 0.5000299811505329 | 0.1666100025210966 | 0.0600900016626156 | F | F | F |
| 0.4982599914069894 | 0.5016000270702463 | 0.0694800019188762 | F | F | F |
| 0.4988099932978187 | 0.8309299945801385 | 0.0696299970120435 | F | F | F |
| 0.8332399726153312 | 0.1666100025210966 | 0.0610099993636766 | F | F | F |
| 0.8332399726178181 | 0.4998199939886163 | 0.0600900016626156 | F | F | F |
| 0.8348900079967692 | 0.8343399763111563 | 0.0588699989124351 | F | F | F |
| 0.0547900013529556 | 0.1105799972670667 | 0.0582499988478276 | F | F | F |
| 0.0574500001527696 | 0.4450300037547379 | 0.0647099986659398 | F | F | F |
| 0.0552599988734528 | 0.7778099775364282 | 0.0577500015516321 | F | F | F |
| 0.3890799879994375 | 0.1110199987696632 | 0.0590200014557141 | F | F | F |
| 0.3847500086142546 | 0.4413599968097515 | 0.0698899999278808 | F | F | F |
| 0.3856300115637481 | 0.7774099707386029 | 0.0697999968969185 | F | F | F |
| 0.7216899990961423 | 0.1110199987696632 | 0.0616299994282770 | F | F | F |
| 0.7213600277433585 | 0.4436900019336107 | 0.0609799995887954 | F | F | F |
| 0.7239000201781849 | 0.7793800235195363 | 0.0617300011113215 | F | F | F |
| 0.0548500008969128 | 0.2779600024177142 | 0.0611100010467140 | F | F | F |
| 0.0548699982635696 | 0.6113299727824142 | 0.0609100013869721 | F | F | F |
| 0.0557399988174794 | 0.9441199898966843 | 0.0569700002542319 | F | F | F |
| 0.3894000053534441 | 0.2770200073944125 | 0.0612200014192723 | F | F | F |
| 0.3885200023536157 | 0.9449700116936768 | 0.0609200000764787 | F | F | F |
| 0.7219600081768291 | 0.2778800130081720 | 0.0612899996210956 | F | F | F |
| 0.7228400111134903 | 0.6104599833518947 | 0.0612800009690204 | F | F | F |
| 0.7218999862732431 | 0.9449999928237744 | 0.0611900016818296 | F | F | F |
| 0.2224700004002287 | 0.1112700029890163 | 0.0579399988155274 | F | F | F |
| 0.2239000052058842 | 0.4420799910817479 | 0.0698800012383671 | F | F | F |

|                    |                    |                    |   |   |   |
|--------------------|--------------------|--------------------|---|---|---|
| 0.2217099964610867 | 0.7781400084212819 | 0.0611599981631770 | F | F | F |
| 0.5554500222519394 | 0.1106600016727199 | 0.0609599985034350 | F | F | F |
| 0.5538799763018645 | 0.4459800124308089 | 0.0648500025197052 | F | F | F |
| 0.5577600002220393 | 0.7759199738370555 | 0.0699200034090950 | F | F | F |
| 0.8886299729346163 | 0.1112200022076308 | 0.0597000010326383 | F | F | F |
| 0.8891900181671417 | 0.4444000124669500 | 0.0609400011618462 | F | F | F |
| 0.8885800242332564 | 0.7773900031831715 | 0.0579899996383304 | F | F | F |
| 0.2204699963058161 | 0.2759700119173587 | 0.0616400018241308 | F | F | F |
| 0.2224200070404621 | 0.6142200231952089 | 0.0697799995553297 | F | F | F |
| 0.2220399975825629 | 0.9445899725293785 | 0.0577399991557783 | F | F | F |
| 0.5561599731237834 | 0.2784900069045193 | 0.0609700009367202 | F | F | F |
| 0.5584899783382440 | 0.6151199936777303 | 0.0699099972694697 | F | F | F |
| 0.5548200011515050 | 0.9423800111137410 | 0.0647599995261743 | F | F | F |
| 0.8888199925564066 | 0.2781499922028985 | 0.0615999996534029 | F | F | F |
| 0.8888300061197185 | 0.6107800006620749 | 0.0590399987973029 | F | F | F |
| 0.8892800212255736 | 0.9450600147559953 | 0.0582900010185554 | F | F | F |
| 0.2981969298630693 | 0.8573441374017721 | 0.3140561130484694 | T | T | T |
| 0.2098296874667740 | 0.7529913305327995 | 0.2947863017081379 | T | T | T |
| 0.4821430597767001 | 0.8842956174204857 | 0.1934119706550159 | T | T | T |
| 0.2112957292863225 | 0.6868718405913868 | 0.3128197316734219 | T | T | T |
| 0.2162463560039617 | 0.7454351743546298 | 0.2541338558647399 | T | T | T |
| 0.1328947632172105 | 0.7446391035983306 | 0.3023120368023366 | T | T | T |
| 0.2966260563752672 | 0.9235963989617524 | 0.2962574205798876 | T | T | T |
| 0.2930108284238272 | 0.8651498209662680 | 0.3547563319843859 | T | T | T |
| 0.4744161317646729 | 0.9076931222328002 | 0.2263602664294350 | T | T | T |
| 0.3750148379889189 | 0.8655326528404683 | 0.3062470913414597 | T | T | T |

#### Structure44

#### O\*H

1.0000000000000000

|                     |                     |                     |
|---------------------|---------------------|---------------------|
| 14.7840003966999998 | 0.0000000000000000  | 0.0000000000000000  |
| -7.3920001983999999 | 12.8033199130999993 | 0.0000000000000000  |
| 0.0000000000000000  | 0.0000000000000000  | 26.7110004425000014 |

|    |   |    |   |   |
|----|---|----|---|---|
| Cu | N | C  | O | H |
| 4  | 9 | 62 | 1 | 1 |

#### Selective dynamics

#### Direct

|                    |                    |                    |   |   |   |
|--------------------|--------------------|--------------------|---|---|---|
| 0.3883999883824316 | 0.6109899878387068 | 0.1237199976883616 | F | F | F |
| 0.4634099900707298 | 0.6000099778136345 | 0.2003100067523818 | T | T | T |
| 0.2926299869793780 | 0.5744299888558544 | 0.1995099932131623 | T | T | T |
| 0.4382599890270527 | 0.7463399768073415 | 0.1910800039851424 | T | T | T |
| 0.3273999989159151 | 0.6724299788206594 | 0.0770300030666817 | F | F | F |
| 0.3273600042078257 | 0.4895400106801233 | 0.0762199982880674 | F | F | F |
| 0.5102499723826810 | 0.6724500060481091 | 0.0761599987757577 | F | F | F |

|                    |                    |                    |   |   |   |
|--------------------|--------------------|--------------------|---|---|---|
| 0.9996700287274507 | 0.0001800000324650 | 0.0573600009216477 | F | F | F |
| 0.0003299999634265 | 0.3344300090962307 | 0.0625099986649431 | F | F | F |
| 0.9996899962509573 | 0.6666100025562471 | 0.0586999989901287 | F | F | F |
| 0.3332400024166660 | 0.0001599999854633 | 0.0586900003380535 | F | F | F |
| 0.6654199958038518 | 0.9995099902101501 | 0.0625599995251847 | F | F | F |
| 0.6666899919723832 | 0.3331600129459886 | 0.0612300001087860 | F | F | F |
| 0.3321700096157301 | 0.3312500119332853 | 0.0634699985367249 | F | F | F |
| 0.6686199903697627 | 0.6676899790852886 | 0.0635500028781806 | F | F | F |
| 0.9991999865008054 | 0.1663299948336885 | 0.0593199990547291 | F | F | F |
| 0.0001500000141448 | 0.5002700090658863 | 0.0620899982600847 | F | F | F |
| 0.9999099969734431 | 0.8333100080615523 | 0.0571499988286135 | F | F | F |
| 0.3328500091896487 | 0.1653199940614059 | 0.0589599981996258 | F | F | F |
| 0.3319799900125986 | 0.8348799943726348 | 0.0628399997826108 | F | F | F |
| 0.6658499836809995 | 0.1663399934903538 | 0.0614599995434091 | F | F | F |
| 0.6657000184196491 | 0.4994199871907909 | 0.0623999982923920 | F | F | F |
| 0.6680499911019240 | 0.8350800275685089 | 0.0631899982792987 | F | F | F |
| 0.1665399968694743 | 0.9999399781380731 | 0.0571300014870246 | F | F | F |
| 0.1647700071264779 | 0.3318099975501880 | 0.0630899965588227 | F | F | F |
| 0.1649599969669993 | 0.6678699851318157 | 0.0628300011305356 | F | F | F |
| 0.4995799959066858 | 0.9996899962566772 | 0.0621200017787373 | F | F | F |
| 0.5004400015054742 | 0.3341600000654878 | 0.0623699985549493 | F | F | F |
| 0.8335300087518434 | 0.0006599999888621 | 0.0593699999149706 | F | F | F |
| 0.8335000276869380 | 0.3339900076717370 | 0.0614399984580416 | F | F | F |
| 0.8345299959310495 | 0.6670100092759697 | 0.0590099990224289 | F | F | F |
| 0.1655199974769772 | 0.1649699956211279 | 0.0588000007106046 | F | F | F |
| 0.1689099967855014 | 0.5010300278786701 | 0.0695900022914344 | F | F | F |
| 0.1661600023717327 | 0.8336899876319350 | 0.0583200007559981 | F | F | F |
| 0.5000299811505329 | 0.1666100025210966 | 0.0600900016626156 | F | F | F |
| 0.4982599914069894 | 0.5016000270702463 | 0.0694800019188762 | F | F | F |
| 0.4988099932978187 | 0.8309299945801385 | 0.0696299970120435 | F | F | F |
| 0.8332399726153312 | 0.1666100025210966 | 0.0610099993636766 | F | F | F |
| 0.8332399726178181 | 0.4998199939886163 | 0.0600900016626156 | F | F | F |
| 0.8348900079967692 | 0.8343399763111563 | 0.0588699989124351 | F | F | F |
| 0.0547900013529556 | 0.1105799972670667 | 0.0582499988478276 | F | F | F |
| 0.0574500001527696 | 0.4450300037547379 | 0.0647099986659398 | F | F | F |
| 0.0552599988734528 | 0.7778099775364282 | 0.0577500015516321 | F | F | F |
| 0.3890799879994375 | 0.1110199987696632 | 0.0590200014557141 | F | F | F |
| 0.3847500086142546 | 0.4413599968097515 | 0.0698899999278808 | F | F | F |
| 0.3856300115637481 | 0.7774099707386029 | 0.0697999968969185 | F | F | F |
| 0.7216899990961423 | 0.1110199987696632 | 0.0616299994282770 | F | F | F |
| 0.7213600277433585 | 0.4436900019336107 | 0.0609799995887954 | F | F | F |
| 0.7239000201781849 | 0.7793800235195363 | 0.0617300011113215 | F | F | F |
| 0.0548500008969128 | 0.2779600024177142 | 0.0611100010467140 | F | F | F |
| 0.0548699982635696 | 0.6113299727824142 | 0.0609100013869721 | F | F | F |



|                    |                    |                    |   |   |   |
|--------------------|--------------------|--------------------|---|---|---|
| 0.0557399988174794 | 0.9441199898966843 | 0.0569700002542319 | F | F | F |
| 0.3894000053534441 | 0.2770200073944125 | 0.0612200014192723 | F | F | F |
| 0.3885200023536157 | 0.9449700116936768 | 0.0609200000764787 | F | F | F |
| 0.7219600081768291 | 0.2778800130081720 | 0.0612899996210956 | F | F | F |
| 0.7228400111134903 | 0.6104599833518947 | 0.0612800009690204 | F | F | F |
| 0.7218999862732431 | 0.9449999928237744 | 0.0611900016818296 | F | F | F |
| 0.2224700004002287 | 0.1112700029890163 | 0.0579399988155274 | F | F | F |
| 0.2239000052058842 | 0.4420799910817479 | 0.0698800012383671 | F | F | F |
| 0.2217099964610867 | 0.7781400084212819 | 0.0611599981631770 | F | F | F |
| 0.5554500222519394 | 0.1106600016727199 | 0.0609599985034350 | F | F | F |
| 0.5538799763018645 | 0.4459800124308089 | 0.0648500025197052 | F | F | F |
| 0.5577600002220393 | 0.7759199738370555 | 0.0699200034090950 | F | F | F |
| 0.8886299729346163 | 0.1112200022076308 | 0.0597000010326383 | F | F | F |
| 0.8891900181671417 | 0.4444000124669500 | 0.0609400011618462 | F | F | F |
| 0.8885800242332564 | 0.7773900031831715 | 0.0579899996383304 | F | F | F |
| 0.2204699963058161 | 0.2759700119173587 | 0.0616400018241308 | F | F | F |
| 0.2224200070404621 | 0.6142200231952089 | 0.0697799995553297 | F | F | F |
| 0.2220399975825629 | 0.9445899725293785 | 0.0577399991557783 | F | F | F |
| 0.5561599731237834 | 0.2784900069045193 | 0.0609700009367202 | F | F | F |
| 0.5584899783382440 | 0.6151199936777303 | 0.0699099972694697 | F | F | F |
| 0.5548200011515050 | 0.9423800111137410 | 0.0647599995261743 | F | F | F |
| 0.8888199925564066 | 0.2781499922028985 | 0.0615999996534029 | F | F | F |
| 0.8888300061197185 | 0.6107800006620749 | 0.0590399987973029 | F | F | F |
| 0.8892800212255736 | 0.9450600147559953 | 0.0582900010185554 | F | F | F |
| 0.4821400046111322 | 0.8842999935052518 | 0.1934099942501604 | T | T | T |
| 0.4744200110684034 | 0.9076899886028187 | 0.2263599932176135 | T | T | T |

### Structure45

H<sub>2</sub>O\*

1.0000000000000000

|                     |                     |                     |
|---------------------|---------------------|---------------------|
| 14.7840003966999998 | 0.0000000000000000  | 0.0000000000000000  |
| -7.3920001983999999 | 12.8033199130999993 | 0.0000000000000000  |
| 0.0000000000000000  | 0.0000000000000000  | 26.7110004425000014 |

| Cu | N | C  | O | H |
|----|---|----|---|---|
| 4  | 9 | 62 | 1 | 2 |

Selective dynamics

Direct

|                    |                    |                    |   |   |   |
|--------------------|--------------------|--------------------|---|---|---|
| 0.3883999883824316 | 0.6109899878387068 | 0.1237199976883616 | F | F | F |
| 0.4651500862699671 | 0.5955047876313943 | 0.1997110794663279 | T | T | T |
| 0.2851814716709609 | 0.5669628361035106 | 0.1983531718066067 | T | T | T |
| 0.4335287845398628 | 0.7361989446016884 | 0.1913878594651489 | T | T | T |
| 0.3273999989159151 | 0.6724299788206594 | 0.0770300030666817 | F | F | F |
| 0.3273600042078257 | 0.4895400106801233 | 0.0762199982880674 | F | F | F |
| 0.5102499723826810 | 0.6724500060481091 | 0.0761599987757577 | F | F | F |

|                    |                    |                    |   |   |   |
|--------------------|--------------------|--------------------|---|---|---|
| 0.9996700287274507 | 0.0001800000324650 | 0.0573600009216477 | F | F | F |
| 0.0003299999634265 | 0.3344300090962307 | 0.0625099986649431 | F | F | F |
| 0.9996899962509573 | 0.6666100025562471 | 0.0586999989901287 | F | F | F |
| 0.3332400024166660 | 0.0001599999854633 | 0.0586900003380535 | F | F | F |
| 0.6654199958038518 | 0.9995099902101501 | 0.0625599995251847 | F | F | F |
| 0.6666899919723832 | 0.3331600129459886 | 0.0612300001087860 | F | F | F |
| 0.3321700096157301 | 0.3312500119332853 | 0.0634699985367249 | F | F | F |
| 0.6686199903697627 | 0.6676899790852886 | 0.0635500028781806 | F | F | F |
| 0.9991999865008054 | 0.1663299948336885 | 0.0593199990547291 | F | F | F |
| 0.0001500000141448 | 0.5002700090658863 | 0.0620899982600847 | F | F | F |
| 0.9999099969734431 | 0.8333100080615523 | 0.0571499988286135 | F | F | F |
| 0.3328500091896487 | 0.1653199940614059 | 0.0589599981996258 | F | F | F |
| 0.3319799900125986 | 0.8348799943726348 | 0.0628399997826108 | F | F | F |
| 0.6658499836809995 | 0.1663399934903538 | 0.0614599995434091 | F | F | F |
| 0.6657000184196491 | 0.4994199871907909 | 0.0623999982923920 | F | F | F |
| 0.6680499911019240 | 0.8350800275685089 | 0.0631899982792987 | F | F | F |
| 0.1665399968694743 | 0.9999399781380731 | 0.0571300014870246 | F | F | F |
| 0.1647700071264779 | 0.3318099975501880 | 0.0630899965588227 | F | F | F |
| 0.1649599969669993 | 0.6678699851318157 | 0.0628300011305356 | F | F | F |
| 0.4995799959066858 | 0.9996899962566772 | 0.0621200017787373 | F | F | F |
| 0.5004400015054742 | 0.3341600000654878 | 0.0623699985549493 | F | F | F |
| 0.8335300087518434 | 0.0006599999888621 | 0.0593699999149706 | F | F | F |
| 0.8335000276869380 | 0.3339900076717370 | 0.0614399984580416 | F | F | F |
| 0.8345299959310495 | 0.6670100092759697 | 0.0590099990224289 | F | F | F |
| 0.1655199974769772 | 0.1649699956211279 | 0.0588000007106046 | F | F | F |
| 0.1689099967855014 | 0.5010300278786701 | 0.0695900022914344 | F | F | F |
| 0.1661600023717327 | 0.8336899876319350 | 0.0583200007559981 | F | F | F |
| 0.5000299811505329 | 0.1666100025210966 | 0.0600900016626156 | F | F | F |
| 0.4982599914069894 | 0.5016000270702463 | 0.0694800019188762 | F | F | F |
| 0.4988099932978187 | 0.8309299945801385 | 0.0696299970120435 | F | F | F |
| 0.8332399726153312 | 0.1666100025210966 | 0.0610099993636766 | F | F | F |
| 0.8332399726178181 | 0.4998199939886163 | 0.0600900016626156 | F | F | F |
| 0.8348900079967692 | 0.8343399763111563 | 0.0588699989124351 | F | F | F |
| 0.0547900013529556 | 0.1105799972670667 | 0.0582499988478276 | F | F | F |
| 0.0574500001527696 | 0.4450300037547379 | 0.0647099986659398 | F | F | F |
| 0.0552599988734528 | 0.7778099775364282 | 0.0577500015516321 | F | F | F |
| 0.3890799879994375 | 0.1110199987696632 | 0.0590200014557141 | F | F | F |
| 0.3847500086142546 | 0.4413599968097515 | 0.0698899999278808 | F | F | F |
| 0.3856300115637481 | 0.7774099707386029 | 0.0697999968969185 | F | F | F |
| 0.7216899990961423 | 0.1110199987696632 | 0.0616299994282770 | F | F | F |
| 0.7213600277433585 | 0.4436900019336107 | 0.0609799995887954 | F | F | F |
| 0.7239000201781849 | 0.7793800235195363 | 0.0617300011113215 | F | F | F |
| 0.0548500008969128 | 0.2779600024177142 | 0.0611100010467140 | F | F | F |
| 0.0548699982635696 | 0.6113299727824142 | 0.0609100013869721 | F | F | F |

|                    |                    |                    |   |   |   |
|--------------------|--------------------|--------------------|---|---|---|
| 0.0557399988174794 | 0.9441199898966843 | 0.0569700002542319 | F | F | F |
| 0.3894000053534441 | 0.2770200073944125 | 0.0612200014192723 | F | F | F |
| 0.3885200023536157 | 0.9449700116936768 | 0.0609200000764787 | F | F | F |
| 0.7219600081768291 | 0.2778800130081720 | 0.0612899996210956 | F | F | F |
| 0.7228400111134903 | 0.6104599833518947 | 0.0612800009690204 | F | F | F |
| 0.7218999862732431 | 0.9449999928237744 | 0.0611900016818296 | F | F | F |
| 0.2224700004002287 | 0.1112700029890163 | 0.0579399988155274 | F | F | F |
| 0.2239000052058842 | 0.4420799910817479 | 0.0698800012383671 | F | F | F |
| 0.2217099964610867 | 0.7781400084212819 | 0.0611599981631770 | F | F | F |
| 0.5554500222519394 | 0.1106600016727199 | 0.0609599985034350 | F | F | F |
| 0.5538799763018645 | 0.4459800124308089 | 0.0648500025197052 | F | F | F |
| 0.5577600002220393 | 0.7759199738370555 | 0.0699200034090950 | F | F | F |
| 0.8886299729346163 | 0.1112200022076308 | 0.0597000010326383 | F | F | F |
| 0.8891900181671417 | 0.4444000124669500 | 0.0609400011618462 | F | F | F |
| 0.8885800242332564 | 0.7773900031831715 | 0.0579899996383304 | F | F | F |
| 0.2204699963058161 | 0.2759700119173587 | 0.0616400018241308 | F | F | F |
| 0.2224200070404621 | 0.6142200231952089 | 0.0697799995553297 | F | F | F |
| 0.2220399975825629 | 0.9445899725293785 | 0.0577399991557783 | F | F | F |
| 0.5561599731237834 | 0.2784900069045193 | 0.0609700009367202 | F | F | F |
| 0.5584899783382440 | 0.6151199936777303 | 0.0699099972694697 | F | F | F |
| 0.5548200011515050 | 0.9423800111137410 | 0.0647599995261743 | F | F | F |
| 0.8888199925564066 | 0.2781499922028985 | 0.0615999996534029 | F | F | F |
| 0.8888300061197185 | 0.6107800006620749 | 0.0590399987973029 | F | F | F |
| 0.8892800212255736 | 0.9450600147559953 | 0.0582900010185554 | F | F | F |
| 0.4895549086583598 | 0.8893367196557923 | 0.2041081545219007 | T | T | T |
| 0.4581602893087315 | 0.9113594943521099 | 0.2299144594836041 | T | T | T |
| 0.5649756423139066 | 0.9319331591363834 | 0.2077688129785838 | T | T | T |
